# Supplementary material
Source: PubMed Central journal article supplement (PMC2747258)
Supplement: NIHMS135773-supplement-1_si_001.pdf [file NIHMS135773-supplement-1_si_001.pdf]

Efficient Enantio- and Diastereodivergent Synthesis of Poison-frog Alkaloids **2510** and **223B**

Naoki Toyooka,<sup>\*,1</sup> Dejun Zhou,<sup>1</sup> Hideo Nemoto,<sup>1</sup> Yasuhiro Tezuka,<sup>2</sup> Shigetoshi Kadota,<sup>2</sup> Nirina R. Andriamaharavo,<sup>3</sup> H. Martin Garraffo,<sup>3</sup> Thomas F. Spande,<sup>3</sup> and John W. Daly<sup>3</sup>

*1. Graduate School of Medicine and Pharmaceutical Sciences, University of Toyama, Sugitani 2630, Toyama 930-0194, Japan*

*2 Institute of Natural Medicine, University of Toyama, Sugitani 2630, Toyama 930-0194, Japan*

*3 Laboratory of Bioorganic Chemistry, National Institute of Diabetes and Digestive and Kidney Diseases, National Institutes of Health, DHHS, Bethesda, MD 20892, USA*

### Supporting Information

#### Table of Contents

|                                                                                                                                                                |     |        |
|----------------------------------------------------------------------------------------------------------------------------------------------------------------|-----|--------|
| General Information                                                                                                                                            | --- | S6     |
| Experimental details for ent- <b>4</b> , ent- <b>5</b> , ent- <b>6</b> , ent- <b>7</b> , ent- <b>11</b> , ent- <b>12</b> , ent- <b>13</b> , and ent- <b>14</b> | --- | S6~S11 |
| <sup>1</sup> H NMR spectrum of (2 <i>R</i> )-(-)-2-(But-3-enyl)-5-oxopyrrolidine-1-carboxylic acid <i>tert</i> -butyl ester                                    | --- | S12    |
| <sup>13</sup> C NMR spectrum of (2 <i>R</i> )-(-)-2-(But-3-enyl)-5-oxopyrrolidine-1-carboxylic acid <i>tert</i> -butyl ester                                   | --- | S13    |
| Dept spectrum of (2 <i>R</i> )-(-)-2-(But-3-enyl)-5-oxopyrrolidine-1-carboxylic acid <i>tert</i> -butyl ester                                                  | --- | S14    |
| <sup>1</sup> H NMR spectrum of Compound ( <b>3</b> , R = <i>n</i> -Pr)                                                                                         | --- | S15    |
| <sup>13</sup> C NMR spectrum of Compound ( <b>3</b> , R = <i>n</i> -Pr)                                                                                        | --- | S16    |
| Dept spectrum of Compound ( <b>3</b> , R = <i>n</i> -Pr)                                                                                                       | --- | S17    |
| <sup>1</sup> H NMR spectrum of Compound ( <b>3</b> , R = <i>n</i> -C <sub>7</sub> H <sub>15</sub> )                                                            | --- | S18    |
| <sup>13</sup> C NMR spectrum of Compound ( <b>3</b> , R = <i>n</i> -C <sub>7</sub> H <sub>15</sub> )                                                           | --- | S19    |
| Dept spectrum of Compound ( <b>3</b> , R = <i>n</i> -C <sub>7</sub> H <sub>15</sub> )                                                                          | --- | S20    |
| <sup>1</sup> H NMR spectrum of Compound ( <b>4</b> , R = <i>n</i> -Pr)                                                                                         | --- | S21    |
| <sup>13</sup> C NMR spectrum of Compound ( <b>4</b> , R = <i>n</i> -Pr)                                                                                        | --- | S22    |
| Dept spectrum of Compound ( <b>4</b> , R = <i>n</i> -Pr)                                                                                                       | --- | S23    |
| <sup>1</sup> H NMR spectrum of Compound ( <b>4</b> , R = <i>n</i> -C <sub>7</sub> H <sub>15</sub> )                                                            | --- | S24    |
| <sup>13</sup> C NMR spectrum of Compound ( <b>4</b> , R = <i>n</i> -C <sub>7</sub> H <sub>15</sub> )                                                           | --- | S25    |

|                                                                                                                         |     |     |
|-------------------------------------------------------------------------------------------------------------------------|-----|-----|
| Dept spectrum of Compound ( <b>4</b> , R = <i>n</i> -C <sub>7</sub> H <sub>15</sub> )                                   | --- | S26 |
| <sup>1</sup> H NMR spectrum of Compound ( <b>5</b> , R = <i>n</i> -Pr)                                                  | --- | S27 |
| <sup>13</sup> C NMR spectrum of Compound ( <b>5</b> , R = <i>n</i> -Pr)                                                 | --- | S28 |
| Dept spectrum of Compound ( <b>5</b> , R = <i>n</i> -Pr)                                                                | --- | S29 |
| <sup>1</sup> H NMR spectrum of Compound ( <b>5</b> , R = <i>n</i> -C <sub>7</sub> H <sub>15</sub> )                     | --- | S30 |
| <sup>13</sup> C NMR spectrum of Compound ( <b>5</b> , R = <i>n</i> -C <sub>7</sub> H <sub>15</sub> )                    | --- | S31 |
| Dept spectrum of Compound ( <b>5</b> , R = <i>n</i> -C <sub>7</sub> H <sub>15</sub> )                                   | --- | S32 |
| <sup>1</sup> H NMR spectrum of Compound ( <b>6</b> , R = Et)                                                            | --- | S33 |
| <sup>13</sup> C NMR spectrum of Compound ( <b>6</b> , R = Et)                                                           | --- | S34 |
| Dept spectrum of Compound ( <b>6</b> , R = Et)                                                                          | --- | S35 |
| <sup>1</sup> H NMR spectrum of Compound ( <b>6</b> , R = <i>n</i> -C <sub>6</sub> H <sub>13</sub> )                     | --- | S36 |
| <sup>13</sup> C NMR spectrum of Compound ( <b>6</b> , R = <i>n</i> -C <sub>6</sub> H <sub>13</sub> )                    | --- | S37 |
| Dept spectrum of Compound ( <b>6</b> , R = <i>n</i> -C <sub>6</sub> H <sub>13</sub> )                                   | --- | S38 |
| <sup>1</sup> H NMR spectrum of olefin by Wittig reaction of Compound ( <b>6</b> , R = Et)                               | --- | S39 |
| <sup>1</sup> H NMR spectrum of Compound ( <b>7</b> , R = <i>n</i> -Pr, R' = <i>n</i> -C <sub>7</sub> H <sub>15</sub> )  | --- | S40 |
| <sup>13</sup> C NMR spectrum of Compound ( <b>7</b> , R = <i>n</i> -Pr, R' = <i>n</i> -C <sub>7</sub> H <sub>15</sub> ) | --- | S41 |
| Dept spectrum of Compound ( <b>7</b> , R = <i>n</i> -Pr, R' = <i>n</i> -C <sub>7</sub> H <sub>15</sub> )                | --- | S42 |
| <sup>1</sup> H NMR spectrum of (3 <i>R</i> ,5 <i>S</i> ,8 <i>S</i> )-(+)-3-Allyl-5-propylhexahydropyrrolizine           | --- | S43 |
| <sup>13</sup> C NMR spectrum of (3 <i>R</i> ,5 <i>S</i> ,8 <i>S</i> )-(+)-3-Allyl-5-propylhexahydropyrrolizine          | --- | S44 |
| Dept spectrum of (3 <i>R</i> ,5 <i>S</i> ,8 <i>S</i> )-(+)-3-Allyl-5-propylhexahydropyrrolizine                         | --- | S45 |
| <sup>1</sup> H NMR spectrum of Compound ( <b>7</b> , R = <i>n</i> -C <sub>7</sub> H <sub>15</sub> , R' = <i>n</i> -Pr)  | --- | S46 |
| <sup>13</sup> C NMR spectrum of Compound ( <b>7</b> , R = <i>n</i> -C <sub>7</sub> H <sub>15</sub> , R' = <i>n</i> -Pr) | --- | S47 |
| Dept spectrum of Compound ( <b>7</b> , R = <i>n</i> -C <sub>7</sub> H <sub>15</sub> , R' = <i>n</i> -Pr)                | --- | S48 |
| <sup>1</sup> H NMR spectrum of Compound ( <b>8</b> , R = <i>n</i> -Pr)                                                  | --- | S49 |
| <sup>13</sup> C NMR spectrum of Compound ( <b>8</b> , R = <i>n</i> -Pr)                                                 | --- | S50 |
| Dept spectrum of Compound ( <b>8</b> , R = <i>n</i> -Pr)                                                                | --- | S51 |
| <sup>1</sup> H NMR spectrum of Compound ( <b>8</b> , R = <i>n</i> -C <sub>7</sub> H <sub>15</sub> )                     | --- | S52 |
| <sup>13</sup> C NMR spectrum of Compound ( <b>8</b> , R = <i>n</i> -C <sub>7</sub> H <sub>15</sub> )                    | --- | S53 |
| Dept spectrum of Compound ( <b>8</b> , R = <i>n</i> -C <sub>7</sub> H <sub>15</sub> )                                   | --- | S54 |
| <sup>1</sup> H NMR spectrum of (5 <i>R</i> )-(-)-5-Propyl-2-oxopyrrolidine-1-carboxylic acid <i>tert</i> -butyl ester   | --- | S55 |
| <sup>13</sup> C NMR spectrum of (2 <i>R</i> )-(-)-5-Propyl-2-oxopyrrolidine-1-carboxylic acid <i>tert</i> -butyl ester  | --- | S56 |

|                                                                                                                             |     |     |
|-----------------------------------------------------------------------------------------------------------------------------|-----|-----|
| Dept spectrum of (2 <i>R</i> )-(-)-5-Propyl-2-oxopyrrolidine-1-carboxylic acid <i>tert</i> -butyl ester                     | --- | S57 |
| <sup>1</sup> H NMR spectrum of (2 <i>R</i> )-(-)-2-Heptyl-5-oxopyrrolidine-1-carboxylic acid <i>tert</i> -butyl ester       | --- | S58 |
| <sup>13</sup> C NMR spectrum of (2 <i>R</i> )-(-)-2-Heptyl-5-oxopyrrolidine-1-carboxylic acid <i>tert</i> -butyl ester      | --- | S59 |
| Dept spectrum of (2 <i>R</i> )-(-)-2-Heptyl-5-oxopyrrolidine-1-carboxylic acid <i>tert</i> -butyl ester                     | --- | S60 |
| <sup>1</sup> H NMR spectrum of Compound ( <b>9</b> , R = <i>n</i> -Pr)                                                      | --- | S61 |
| <sup>13</sup> C NMR spectrum of Compound ( <b>9</b> , R = <i>n</i> -Pr)                                                     | --- | S62 |
| Dept spectrum of Compound ( <b>9</b> , R = <i>n</i> -Pr)                                                                    | --- | S63 |
| <sup>1</sup> H NMR spectrum of Compound ( <b>9</b> , R = <i>n</i> -C <sub>7</sub> H <sub>15</sub> )                         | --- | S64 |
| <sup>13</sup> C NMR spectrum of Compound ( <b>9</b> , R = <i>n</i> -C <sub>7</sub> H <sub>15</sub> )                        | --- | S65 |
| Dept spectrum of Compound ( <b>9</b> , R = <i>n</i> -C <sub>7</sub> H <sub>15</sub> )                                       | --- | S66 |
| <sup>1</sup> H NMR spectrum of Compound (ent- <b>4</b> , R = <i>n</i> -Pr)                                                  | --- | S67 |
| <sup>13</sup> C NMR spectrum of Compound (ent- <b>4</b> , R = <i>n</i> -Pr)                                                 | --- | S68 |
| Dept spectrum of Compound (ent- <b>4</b> , R = <i>n</i> -Pr)                                                                | --- | S69 |
| <sup>1</sup> H NMR spectrum of Compound (ent- <b>5</b> , R = <i>n</i> -Pr)                                                  | --- | S70 |
| <sup>13</sup> C NMR spectrum of Compound (ent- <b>5</b> , R = <i>n</i> -Pr)                                                 | --- | S71 |
| Dept spectrum of Compound (ent- <b>5</b> , R = <i>n</i> -Pr)                                                                | --- | S72 |
| <sup>1</sup> H NMR spectrum of Compound (ent- <b>5</b> , R = <i>n</i> -C <sub>7</sub> H <sub>15</sub> )                     | --- | S73 |
| <sup>13</sup> C NMR spectrum of Compound (ent- <b>5</b> , R = <i>n</i> -C <sub>7</sub> H <sub>15</sub> )                    | --- | S74 |
| Dept spectrum of Compound (ent- <b>5</b> , R = <i>n</i> -C <sub>7</sub> H <sub>15</sub> )                                   | --- | S75 |
| <sup>1</sup> H NMR spectrum of Compound (ent- <b>6</b> , R = Et)                                                            | --- | S76 |
| <sup>13</sup> C NMR spectrum of Compound (ent- <b>6</b> , R = Et)                                                           | --- | S77 |
| Dept spectrum of Compound (ent- <b>6</b> , R = Et)                                                                          | --- | S78 |
| <sup>1</sup> H NMR spectrum of Compound (ent- <b>6</b> , R = <i>n</i> -C <sub>6</sub> H <sub>13</sub> )                     | --- | S79 |
| <sup>13</sup> C NMR spectrum of Compound (ent- <b>6</b> , R = <i>n</i> -C <sub>6</sub> H <sub>13</sub> )                    | --- | S80 |
| Dept spectrum of Compound (ent- <b>6</b> , R = <i>n</i> -C <sub>6</sub> H <sub>13</sub> )                                   | --- | S81 |
| <sup>1</sup> H NMR spectrum of olefin by Wittig reaction of Compound (ent- <b>6</b> , R = Et)                               | --- | S82 |
| <sup>1</sup> H NMR spectrum of Compound (ent- <b>7</b> , R = <i>n</i> -Pr, R' = <i>n</i> -C <sub>7</sub> H <sub>15</sub> )  | --- | S83 |
| <sup>13</sup> C NMR spectrum of Compound (ent- <b>7</b> , R = <i>n</i> -Pr, R' = <i>n</i> -C <sub>7</sub> H <sub>15</sub> ) | --- | S84 |
| Dept spectrum of Compound (ent- <b>7</b> , R = <i>n</i> -Pr, R' = <i>n</i> -C <sub>7</sub> H <sub>15</sub> )                | --- | S85 |

|                                                                                                                             |     |      |
|-----------------------------------------------------------------------------------------------------------------------------|-----|------|
| <sup>1</sup> H NMR spectrum of (3 <i>S</i> ,5 <i>R</i> ,8 <i>R</i> )-(-)-3-Allyl-5-propylhexahydropyrrolizine               | --- | S86  |
| <sup>13</sup> C NMR spectrum of (3 <i>S</i> ,5 <i>R</i> ,8 <i>R</i> )-(-)-3-Allyl-5-propylhexahydropyrrolizine              | --- | S87  |
| Dept spectrum of (3 <i>S</i> ,5 <i>R</i> ,8 <i>R</i> )-(-)-3-Allyl-5-propylhexahydropyrrolizine                             | --- | S88  |
| <sup>1</sup> H NMR spectrum of Compound (ent- <b>7</b> , R = <i>n</i> -C <sub>7</sub> H <sub>15</sub> , R' = <i>n</i> -Pr)  | --- | S89  |
| <sup>13</sup> C NMR spectrum of Compound (ent- <b>7</b> , R = <i>n</i> -C <sub>7</sub> H <sub>15</sub> , R' = <i>n</i> -Pr) | --- | S90  |
| Dept spectrum of Compound (ent- <b>7</b> , R = <i>n</i> -C <sub>7</sub> H <sub>15</sub> , R' = <i>n</i> -Pr)                | --- | S91  |
| <sup>1</sup> H NMR spectrum of Compound ( <b>10</b> )                                                                       | --- | S92  |
| <sup>13</sup> C NMR spectrum of Compound ( <b>10</b> )                                                                      | --- | S93  |
| Dept spectrum of Compound ( <b>10</b> )                                                                                     | --- | S94  |
| <sup>1</sup> H NMR spectrum of Compound ( <b>11</b> )                                                                       | --- | S95  |
| <sup>13</sup> C NMR spectrum of Compound ( <b>11</b> )                                                                      | --- | S96  |
| Dept spectrum of Compound ( <b>11</b> )                                                                                     | --- | S97  |
| <sup>1</sup> H NMR spectrum of Compound ( <b>12</b> )                                                                       | --- | S98  |
| <sup>13</sup> C NMR spectrum of Compound ( <b>12</b> )                                                                      | --- | S99  |
| Dept spectrum of Compound ( <b>12</b> )                                                                                     | --- | S100 |
| <sup>1</sup> H NMR spectrum of Compound ( <b>13</b> )                                                                       | --- | S101 |
| <sup>13</sup> C NMR spectrum of Compound ( <b>13</b> )                                                                      | --- | S102 |
| Dept spectrum of Compound ( <b>13</b> )                                                                                     | --- | S103 |
| <sup>1</sup> H NMR spectrum of olefin by Wittig reaction of Compound ( <b>13</b> )                                          | --- | S104 |
| <sup>1</sup> H NMR spectrum of Compound ( <b>14</b> )                                                                       | --- | S105 |
| <sup>13</sup> C NMR spectrum of Compound ( <b>14</b> )                                                                      | --- | S106 |
| Dept spectrum of Compound ( <b>14</b> )                                                                                     | --- | S107 |
| <sup>1</sup> H NMR spectrum of (2 <i>R</i> )-(-)-2-Butyl-5-oxopyrrolidine-1-carboxylic acid <i>tert</i> -butyl ester        | --- | S108 |
| <sup>13</sup> C NMR spectrum of (2 <i>R</i> )-(-)-2-Butyl-5-oxopyrrolidine-1-carboxylic acid <i>tert</i> -butyl ester       | --- | S109 |
| Dept spectrum of (2 <i>R</i> )-(-)-2-Butyl-5-oxopyrrolidine-1-carboxylic acid <i>tert</i> -butyl ester                      | --- | S110 |
| <sup>1</sup> H NMR spectrum of Compound ( <b>15</b> )                                                                       | --- | S111 |
| <sup>13</sup> C NMR spectrum of Compound ( <b>15</b> )                                                                      | --- | S112 |
| Dept spectrum of Compound ( <b>15</b> )                                                                                     | --- | S113 |
| <sup>1</sup> H NMR spectrum of Compound (ent- <b>11</b> )                                                                   | --- | S114 |
| <sup>13</sup> C NMR spectrum of Compound (ent- <b>11</b> )                                                                  | --- | S115 |

|                                                                                                                                                                                                 |     |      |
|-------------------------------------------------------------------------------------------------------------------------------------------------------------------------------------------------|-----|------|
| Dept spectrum of Compound (ent- <b>11</b> )                                                                                                                                                     | --- | S116 |
| <sup>1</sup> H NMR spectrum of Compound (ent- <b>12</b> )                                                                                                                                       | --- | S117 |
| <sup>13</sup> C NMR spectrum of Compound (ent- <b>12</b> )                                                                                                                                      | --- | S118 |
| Dept spectrum of Compound (ent- <b>12</b> )                                                                                                                                                     | --- | S119 |
| <sup>1</sup> H NMR spectrum of Compound (ent- <b>13</b> )                                                                                                                                       | --- | S120 |
| <sup>13</sup> C NMR spectrum of Compound (ent- <b>13</b> )                                                                                                                                      | --- | S121 |
| Dept spectrum of Compound (ent- <b>13</b> )                                                                                                                                                     | --- | S122 |
| <sup>1</sup> H NMR spectrum of olefin by Wittig reaction of Compound (ent- <b>13</b> )                                                                                                          | --- | S123 |
| <sup>1</sup> H NMR spectrum of Compound (ent- <b>14</b> )                                                                                                                                       | --- | S124 |
| <sup>13</sup> C NMR spectrum of Compound (ent- <b>14</b> )                                                                                                                                      | --- | S125 |
| Dept spectrum of Compound (ent- <b>14</b> )                                                                                                                                                     | --- | S126 |
| FT-IR spectrum of <b>7</b> (R = <i>n</i> -C <sub>7</sub> H <sub>15</sub> , R' = <i>n</i> -Pr)                                                                                                   | --- | S127 |
| FT-IR spectrum of ent- <b>7</b> (R = <i>n</i> -C <sub>7</sub> H <sub>15</sub> , R' = <i>n</i> -Pr)                                                                                              | --- | S128 |
| FT-IR spectrum of <b>7</b> (R = <i>n</i> -Pr, R' = <i>n</i> -C <sub>7</sub> H <sub>15</sub> )                                                                                                   | --- | S129 |
| FT-IR spectrum of ent- <b>7</b> (R = <i>n</i> -Pr, R' = <i>n</i> -C <sub>7</sub> H <sub>15</sub> )                                                                                              | --- | S130 |
| FT-IR spectrum of natural <b>2510</b> from <i>M. baroni</i>                                                                                                                                     | --- | S131 |
| FT-IR spectrum of natural <b>2510</b> from <i>M. bernhardi</i>                                                                                                                                  | --- | S132 |
| GC-MS of a coinjection of ent- <b>7</b> (R = <i>n</i> -Pr, R' = <i>n</i> -C <sub>7</sub> H <sub>15</sub> ) and ent- <b>7</b> (R = <i>n</i> -C <sub>7</sub> H <sub>15</sub> , R' = <i>n</i> -Pr) | --- | S133 |
| GC-MS of a coinjection of ent- <b>7</b> (R = <i>n</i> -Pr, R' = <i>n</i> -C <sub>7</sub> H <sub>15</sub> ) and <i>M. baroni</i>                                                                 | --- | S134 |
| GC-MS of a coinjection of ent- <b>7</b> (R = <i>n</i> -C <sub>7</sub> H <sub>15</sub> , R' = <i>n</i> -Pr) and <i>M. baroni</i>                                                                 | --- | S135 |

## General

All reactions were performed under argon atmosphere. All commercially available reagents were used without further purification unless otherwise noted. Column chromatography was performed with silica gel (0.063-0.2 mm). Solvents were evaporated under reduced pressure. All yields given refer to as isolated yields. Optical rotations were measured on a precision automated polarimeter. NMR spectra were recorded on a 300 or 500 MHz spectrometer. Chemical shifts ( $\delta$ ) are reported in ppm downfield from tetramethylsilane. Coupling constants ( $J$  values) are reported in Hertz. IR spectra were recorded on a FT-IR spectrometer. MS and HRMS experiments were performed on a high/low resolution magnetic sector mass spectrometer. GCMS experiments were performed using a mass selective detector GC/MS system.

### **(2*S*,5*R*)-(+)-2-But-3-enyl-5-propylpyrrolidine-1-carboxylic acid *tert*-butyl ester (ent-4, R = *n*-Pr)**

To a stirred solution of **9** (R = *n*-Pr, 1.22 g, 4.31 mmol) in CH<sub>2</sub>Cl<sub>2</sub> (20 mL) was added a solution of (C<sub>6</sub>F<sub>5</sub>)<sub>3</sub>B (441 mg, 0.86 mmol) and Ph<sub>3</sub>SiH (2.25 g, 8.62 mmol) in CH<sub>2</sub>Cl<sub>2</sub> (25 mL) at -78 °C, and the reaction mixture was stirred at -78 °C for 30 min, and then at room temperature for 20 h. The reaction was quenched with Et<sub>3</sub>N (4.0 mL), and the resulting mixture was stirred at room temperature for 20 min. The mixture was diluted with Et<sub>2</sub>O, and the organic layer was washed successively with 10% AcOH (aq) solution and satd. NaHCO<sub>3</sub> (aq) solution, dried over MgSO<sub>4</sub>, and evaporated to give a pale yellow oil, that was chromatographed on silica gel (60 g, hexane/acetone=200:1-150:1) to give ent-4 (R = *n*-Pr, 839 mg, 73%) as a colorless oil.

The spectral data were identical with those of **4** (R = *n*-Pr).  $[\alpha]_D^{26} +3.14$  ( $c$  1.07, CHCl<sub>3</sub>).

### **(2*S*,5*R*)-(+)-2-But-3-enyl-5-heptylpyrrolidine-1-carboxylic acid *tert*-butyl ester (ent-4, R = *n*-C<sub>7</sub>H<sub>15</sub>)**

To a stirred solution of **9** (R = *n*-C<sub>7</sub>H<sub>15</sub>, 786 mg, 2.32 mmol) in CH<sub>2</sub>Cl<sub>2</sub> (30 mL) was added a solution of (C<sub>6</sub>F<sub>5</sub>)<sub>3</sub>B (238 mg, 0.46 mmol) and Ph<sub>3</sub>SiH (1.21 g, 4.64 mmol) in CH<sub>2</sub>Cl<sub>2</sub> (5 mL) at -78 °C, and the reaction mixture was stirred at -78 °C for 30 min, and then at room temperature for 22 h. The reaction was quenched with Et<sub>3</sub>N (2.5 mL), and the resulting mixture was stirred at room temperature for 20 min. The mixture was diluted with Et<sub>2</sub>O, and the organic layer was washed successively with 10% AcOH (aq) solution and satd. NaHCO<sub>3</sub> (aq) solution, dried over MgSO<sub>4</sub>, and evaporated to give a pale yellow oil, that was

chromatographed on silica gel (40 g, hexane/acetone=200:1-150:1) to give ent-**4** (R = *n*-C<sub>7</sub>H<sub>15</sub>, 644 mg, 86%) as a colorless oil.

The spectral data were identical with those of **4** (R = *n*-C<sub>7</sub>H<sub>15</sub>).  $[\alpha]_D^{26} +0.92$  (*c* 1.03, CHCl<sub>3</sub>).

**(2*S*,5*R*)-(+)-2-(4-Ethoxycarbonylbut-3-enyl)-5-propylpyrrolidine-1-carboxylic acid  
tert-butyl ester (ent-**5**, R = *n*-Pr)**

To a stirred solution of ent-**4** (R = *n*-Pr, 637 mg, 2.38 mmol) in CH<sub>2</sub>Cl<sub>2</sub> (25 mL) were added Grubbs 2<sup>nd</sup> catalyst (81 mg, 0.095 mmol) and ethyl acrylate (1.3 mL, 11.90 mmol), and the resulting mixture was refluxed for 6 h. After cooling, the solvent was removed under reduced pressure, and the residue was chromatographed on silica gel (40 g, hexane/acetone=100:1-60:1) to give ent-**5** (R = *n*-Pr, 784 mg, 97%) as a pale yellow oil.

The spectral data were identical with those of **5** (R = *n*-Pr).  $[\alpha]_D^{26} +6.42$  (*c* 0.70, CHCl<sub>3</sub>).

**(2*S*,5*R*)-(+)-2-(4-Ethoxycarbonylbut-3-enyl)-5-heptylpyrrolidine-1-carboxylic acid  
tert-butyl ester (ent-**5**, R = *n*-C<sub>7</sub>H<sub>15</sub>)**

To a stirred solution of ent-**4** (R = *n*-C<sub>7</sub>H<sub>15</sub>, 644 mg, 1.99 mmol) in CH<sub>2</sub>Cl<sub>2</sub> (25 mL) were added Grubbs 2<sup>nd</sup> catalyst (68 mg, 0.080 mmol) and ethyl acrylate (1.0 mL, 9.97 mmol), and the resulting mixture was refluxed for 5.5 h. After cooling, the solvent was removed under reduced pressure, and the residue was chromatographed on silica gel (20 g, hexane/acetone=100:1-60:1) to give ent-**5** (R = *n*-C<sub>7</sub>H<sub>15</sub>, 748 mg, 95%) as a pale yellow oil.

The spectral data were identical with those of **5** (R = *n*-C<sub>7</sub>H<sub>15</sub>).  $[\alpha]_D^{26} +1.59$  (*c* 0.71, CHCl<sub>3</sub>).

**(3*R*,5*S*,8*S*)-(-)-(5-Propylhexahydropyrrolizin-3-yl)acetic acid ethyl ester (ent-**6**, R = *n*-Pr)**

To a stirred solution of ent-**5** (R = *n*-Pr, 240 mg, 0.71 mmol) in CH<sub>2</sub>Cl<sub>2</sub> (20 mL) was added AlCl<sub>3</sub> (206 mg, 1.56 mmol) at 0 °C, and the resulting suspension was stirred at room temperature for 24 h. The reaction was quenched with satd. NaHCO<sub>3</sub> (aq) solution, and the organic layer was separated. The aqueous layer was extracted with CHCl<sub>3</sub> (15 mL x 5), and the organic layer and extracts were combined, dried over K<sub>2</sub>CO<sub>3</sub>, and evaporated to give a residue. To a stirred solution of this residue in CH<sub>2</sub>Cl<sub>2</sub> (20 mL) was added K<sub>2</sub>CO<sub>3</sub> (200 mg, 1.42 mmol), and the resulting suspension was stirred at room temperature for 48 h. The insoluble material was filtered off, and washed with CH<sub>2</sub>Cl<sub>2</sub>. The filtrate was evaporated to afford the residue, that was chromatographed on silica gel (20 g, hexane/acetone=20:1-8:1) to give ent-**6** (R = *n*-Pr, 157 mg, 93%) as a pale yellow oil.

The spectral data were identical with those of **6** (R = Et).  $[\alpha]_D^{26}$  -29.06 (*c* 0.53, CHCl<sub>3</sub>).

**(3*S*,5*R*,8*R*)-(-)-(5-Heptylhexahydropyrrolizin-3-yl)acetic acid ethyl ester (ent-6, R = *n*-C<sub>7</sub>H<sub>15</sub>)**

To a stirred solution of ent-**5** (R = *n*-C<sub>7</sub>H<sub>15</sub>, 120 mg, 0.30 mmol) in CH<sub>2</sub>Cl<sub>2</sub> (10 mL) was added AlCl<sub>3</sub> (89 mg, 0.67 mmol) at 0 °C, and the resulting suspension was stirred at room temperature for 24 h. The reaction was quenched with satd. NaHCO<sub>3</sub> (aq) solution, and the organic layer was separated. The aqueous layer was extracted with CHCl<sub>3</sub> (10 mL x 5), and the organic layer and extracts were combined, dried over K<sub>2</sub>CO<sub>3</sub>, and evaporated to give a residue. To a stirred solution of this residue in CH<sub>2</sub>Cl<sub>2</sub> (10 mL) was added K<sub>2</sub>CO<sub>3</sub> (84 mg, 0.60 mmol), and the resulting suspension was stirred at room temperature for 48 h. The insoluble material was filtered off, and washed with CH<sub>2</sub>Cl<sub>2</sub>. The filtrate was evaporated to afford the residue, that was chromatographed on silica gel (20 g, hexane/acetone=20:1-8:1) to give ent-**6** (R = *n*-C<sub>7</sub>H<sub>15</sub>, 82 mg, 91%) as a pale yellow oil.

The spectral data were identical with those of **6** (R = *n*-C<sub>6</sub>H<sub>13</sub>).  $[\alpha]_D^{26}$  -18.65 (*c* 1.00, CHCl<sub>3</sub>).

**(3*R*,5*R*,8*R*)-(-)-3-Heptyl-5-propylhexahydropyrrolizine (ent-7 R = *n*-Pr, R' = *n*-C<sub>7</sub>H<sub>15</sub>)**

To a stirred solution of ent-**6** (R = *n*-Pr, 81 mg, 0.33 mmol) in CH<sub>2</sub>Cl<sub>2</sub> (7 mL) was added a solution of DIBAL (0.98 M in hexane, 0.37 mL, 0.36 mmol) at -50 °C, and the reaction mixture was stirred at -50 °C for 30 min. The reaction was quenched with MeOH, and satd. Rochelle (aq) solution, and the organic layer was separated. The aqueous layer was extracted with CH<sub>2</sub>Cl<sub>2</sub> (5 mL x 3), and the organic layer and extracts were combined, dried over K<sub>2</sub>CO<sub>3</sub>, and evaporated to give a pale yellow oil, that was used directly in the next step.

To a stirred suspension of *n*-C<sub>5</sub>H<sub>11</sub>P<sup>+</sup>Ph<sub>3</sub>Br<sup>-</sup> (556 mg, 1.32 mmol) in THF (10 mL) was added a solution of *n*-BuLi (1.6 M in hexane, 0.72 mL, 1.16 mmol) at 0 °C, and the resulting orange suspension was stirred at 0 °C for 10 min. To the suspension was added a solution of the above aldehyde in THF (3 mL) at 0 °C, and the resulting suspension was stirred at room temperature for 21 h. The reaction was quenched with H<sub>2</sub>O, and the aqueous mixture was extracted with Et<sub>2</sub>O (15 mL x 4). The organic extracts were combined, dried over K<sub>2</sub>CO<sub>3</sub>, and evaporated to give a residue, that was chromatographed on silica gel (20 g, hexane/acetone=25:1-10:1) to give the corresponding olefin (39 mg, 48%) as a mixture of *E*- and *Z*-isomers.

The <sup>1</sup>H NMR spectrum was identical with that of the enantiomer.



To a stirred solution of the above olefin (20 mg, 0.08 mmol) in EtOAc (3 mL) was added 10% Pd/C (10 mg), and the resulting suspension was stirred under a hydrogen atmosphere at 1 atm for 40 h. The catalyst was removed by filtration and the filtrate was evaporated to give ent-**7** (R = *n*-Pr, R' = *n*-C<sub>7</sub>H<sub>15</sub>, 19 mg, 96%) as a pale yellow oil.

The spectral data were identical with those of **7** (R = *n*-Pr, R' = *n*-C<sub>7</sub>H<sub>15</sub>).  $[\alpha]_{\text{D}}^{26} +35.77$  (*c* 0.37, CHCl<sub>3</sub>).

**(3S,5R,8R)-(-)-3-Allyl-5-heptylhexahydropyrrolizine**

To a stirred solution of ent-**6** (R = *n*-C<sub>6</sub>H<sub>13</sub>, 95 mg, 0.32 mmol) in CH<sub>2</sub>Cl<sub>2</sub> (7 mL) was added a solution of DIBAL (0.98 M in hexane, 0.36 mL, 0.35 mmol) at -50 °C, and the reaction mixture was stirred at -50 °C for 30 min. The reaction was quenched with MeOH, and then satd. Rochelle (aq) solution, and the organic layer was separated. The aqueous layer was extracted with CH<sub>2</sub>Cl<sub>2</sub> (5 mL x 3), and the organic layer and extracts were combined, dried over K<sub>2</sub>CO<sub>3</sub>, and evaporated to give a pale yellow oil, that was used directly in the next step.

To a stirred suspension of MeP<sup>+</sup>Ph<sub>3</sub>I<sup>-</sup> (517 mg, 1.28 mmol) in THF (10 mL) was added a solution of *n*-BuLi (1.6 M in hexane, 0.70 mL, 1.12 mmol) at 0 °C, and the resulting orange suspension was stirred at 0 °C for 10 min. To the suspension was added a solution of the above aldehyde in THF (3 mL) at 0 °C, and the resulting suspension was stirred at room temperature for 31 h. The reaction was quenched with H<sub>2</sub>O, and the aqueous mixture was extracted with Et<sub>2</sub>O (15 mL x 4). The organic extracts were combined, dried over K<sub>2</sub>CO<sub>3</sub>, and evaporated to give a residue, that was chromatographed on silica gel (20 g, hexane/acetone=20:1-10:1) to give the corresponding olefin (41 mg, 52%) as a pale yellow oil.

The spectral data were identical with those of the enantiomer.  $[\alpha]_{\text{D}}^{26} -22.99$  (*c* 0.10, CHCl<sub>3</sub>).

**(3R,5R,8S)-(-)-3-Heptyl-5-propylhexahydropyrrolizine (ent-7 R = *n*-C<sub>7</sub>H<sub>15</sub>, R' = *n*-Pr)**

To a stirred solution of the above olefin (22 mg, 0.09mmol) in EtOAc (3 mL) was added 10% Pd/C (10 mg), and the resulting suspension was stirred under a hydrogen atmosphere at 1 atm for 48 h. The catalyst was removed by filtration and the filtrate was evaporated to give ent-**7** (R = *n*-C<sub>7</sub>H<sub>15</sub>, R' = *n*-Pr, 22 mg, quant) as a pale yellow oil.

The spectral data were identical with those of **7** (R = *n*-C<sub>7</sub>H<sub>15</sub>, R' = *n*-Pr).  $[\alpha]_{\text{D}}^{26} -26.07$  (*c* 0.25, CHCl<sub>3</sub>).

**(2*S*,5*R*)-(+)-2-But-3-enyl-5-butylpyrrolidine-1-carboxylic acid *tert*-butyl ester (ent-11)**

To a stirred solution of **11** (155 mg, 0.52 mmol) in CH<sub>2</sub>Cl<sub>2</sub> (5 mL) was added a solution of (C<sub>6</sub>F<sub>5</sub>)<sub>3</sub>B (54 mg, 0.10 mmol) and Ph<sub>3</sub>SiH (260 mg, 1.04 mmol) in CH<sub>2</sub>Cl<sub>2</sub> (10 mL) at -78 °C, and the reaction mixture was stirred at -78 °C for 30 min, and then at room temperature for 26 h. The reaction was quenched with Et<sub>3</sub>N (1.0 mL), and the resulting mixture was stirred at room temperature for 20 min. The mixture was diluted with Et<sub>2</sub>O, and the organic layer was washed successively with 10% AcOH (aq) solution and satd. NaHCO<sub>3</sub> (aq) solution, dried over MgSO<sub>4</sub>, and evaporated to give a pale yellow oil, that was chromatographed on silica gel (20 g, hexane/acetone=200:1-150:1) to give ent-**11** (105 mg, 72%) as a colorless oil.

The spectral data were identical with those of **11**.  $[\alpha]_D^{26} +3.10$  (*c* 0.46, CHCl<sub>3</sub>).

**(2*S*,5*R*)-(+)-2-(4-Ethoxycarbonylbut-3-enyl)-5-butylpyrrolidine-1-carboxylic acid *tert*-butyl ester (ent-12)**

To a stirred solution of ent-**11** (270 mg, 0.96 mmol) in CH<sub>2</sub>Cl<sub>2</sub> (15 mL) were added Grubbs 2<sup>nd</sup> catalyst (33 mg, 0.04 mmol) and ethyl acrylate (0.52 mL, 4.80 mmol), and the resulting mixture was refluxed for 7 h. After cooling, the solvent was removed under reduced pressure, and the residue was chromatographed on silica gel (20 g, hexane/acetone=100:1-60:1) to give ent-**12** (286 mg, 84%) as a pale yellow oil.

The spectral data were identical with those of **12**.  $[\alpha]_D^{26} +2.81$  (*c* 0.42, CHCl<sub>3</sub>).

**(3*S*,5*R*,8*R*)-(-)-(5-Butylhexahydropyrrolizin-3-yl)acetic acid ethyl ester (ent-13)**

To a stirred solution of ent-**12** (276 mg, 0.78 mmol) in CH<sub>2</sub>Cl<sub>2</sub> (15 mL) was added AlCl<sub>3</sub> (229 mg, 1.72 mmol) at 0 °C, and the resulting suspension was stirred at room temperature for 24 h. The reaction was quenched with satd. NaHCO<sub>3</sub> (aq) solution, and the organic layer was separated. The aqueous layer was extracted with CHCl<sub>3</sub> (20 mL x 5), and the organic layer and extracts were combined, dried over K<sub>2</sub>CO<sub>3</sub>, and evaporated to give a residue. To a stirred solution of this residue in CH<sub>2</sub>Cl<sub>2</sub> (15 mL) was added K<sub>2</sub>CO<sub>3</sub> (168 mg, 1.22 mmol), and the resulting suspension was stirred at room temperature for 58 h. The insoluble material was filtered off, and washed with CH<sub>2</sub>Cl<sub>2</sub>. The filtrate was evaporated to afford a residue, that was chromatographed on silica gel (30 g, hexane/acetone=20:1-8:1) to give ent-**13** (174 mg, 88%) as a pale yellow oil.

The spectral data were identical with those of **13**.  $[\alpha]_D^{26} -24.01$  (*c* 0.87, CHCl<sub>3</sub>).

**(3*R*,5*R*,8*R*)-(-)-3,5-Dibutylhexahydropyrrolizine (ent-14)**

To a stirred solution of ent-**13** (75 mg, 0.30 mmol) in CH<sub>2</sub>Cl<sub>2</sub> (7 mL) was added a solution of DIBAL (0.98 M in hexane, 0.34 mL, 0.33 mmol) at -50 °C, and the reaction mixture was stirred at -50 °C for 30 min. The reaction was quenched with MeOH, and satd. Rochelle (aq) solution, and the organic layer was separated. The aqueous layer was extracted with CH<sub>2</sub>Cl<sub>2</sub> (5 mL x 3), and the organic layer and extracts were combined, dried over K<sub>2</sub>CO<sub>3</sub>, and evaporated to give a pale yellow oil, that was used directly in the next step.

To a stirred suspension of EtP<sup>+</sup>Ph<sub>3</sub>Br<sup>-</sup> (440 mg, 1.20 mmol) in THF (10 mL) was added a solution of *n*-BuLi (1.6 M in hexane, 0.64 mL, 1.05 mmol) at 0 °C, and the resulting orange suspension was stirred at 0 °C for 10 min. To the suspension was added a solution of the above aldehyde in THF (3 mL) at 0 °C, and the resulting suspension was stirred at room temperature for 23 h. The reaction was quenched with H<sub>2</sub>O, and the aqueous mixture was extracted with Et<sub>2</sub>O (15 mL x 4). The organic extracts were combined, dried over K<sub>2</sub>CO<sub>3</sub>, and evaporated to give a residue, that was chromatographed on silica gel (20 g, hexane/acetone=25:1-10:1) to give the corresponding olefin (35 mg, 53%) as a mixture of *E*- and *Z*-isomers.

The <sup>1</sup>H NMR spectrum was identical with that of the enantiomer.

To a stirred solution of the above olefin (30 mg, 0.14 mmol) in EtOAc (5 mL) was added 10% Pd/C (20 mg), and the resulting suspension was stirred under a hydrogen atmosphere at 1 atm for 48 h. The catalyst was removed by filtration and the filtrate was evaporated to give ent-**14** (30 mg, quant) as a pale yellow oil.

The spectral data were identical with those of **14**.  $[\alpha]_D^{26} -29.94$  (*c* 1.32, CHCl<sub>3</sub>).

## STANDARD PROTON PARAMETERS

Pulse Sequence: s2pu1

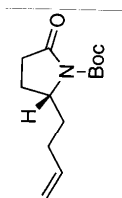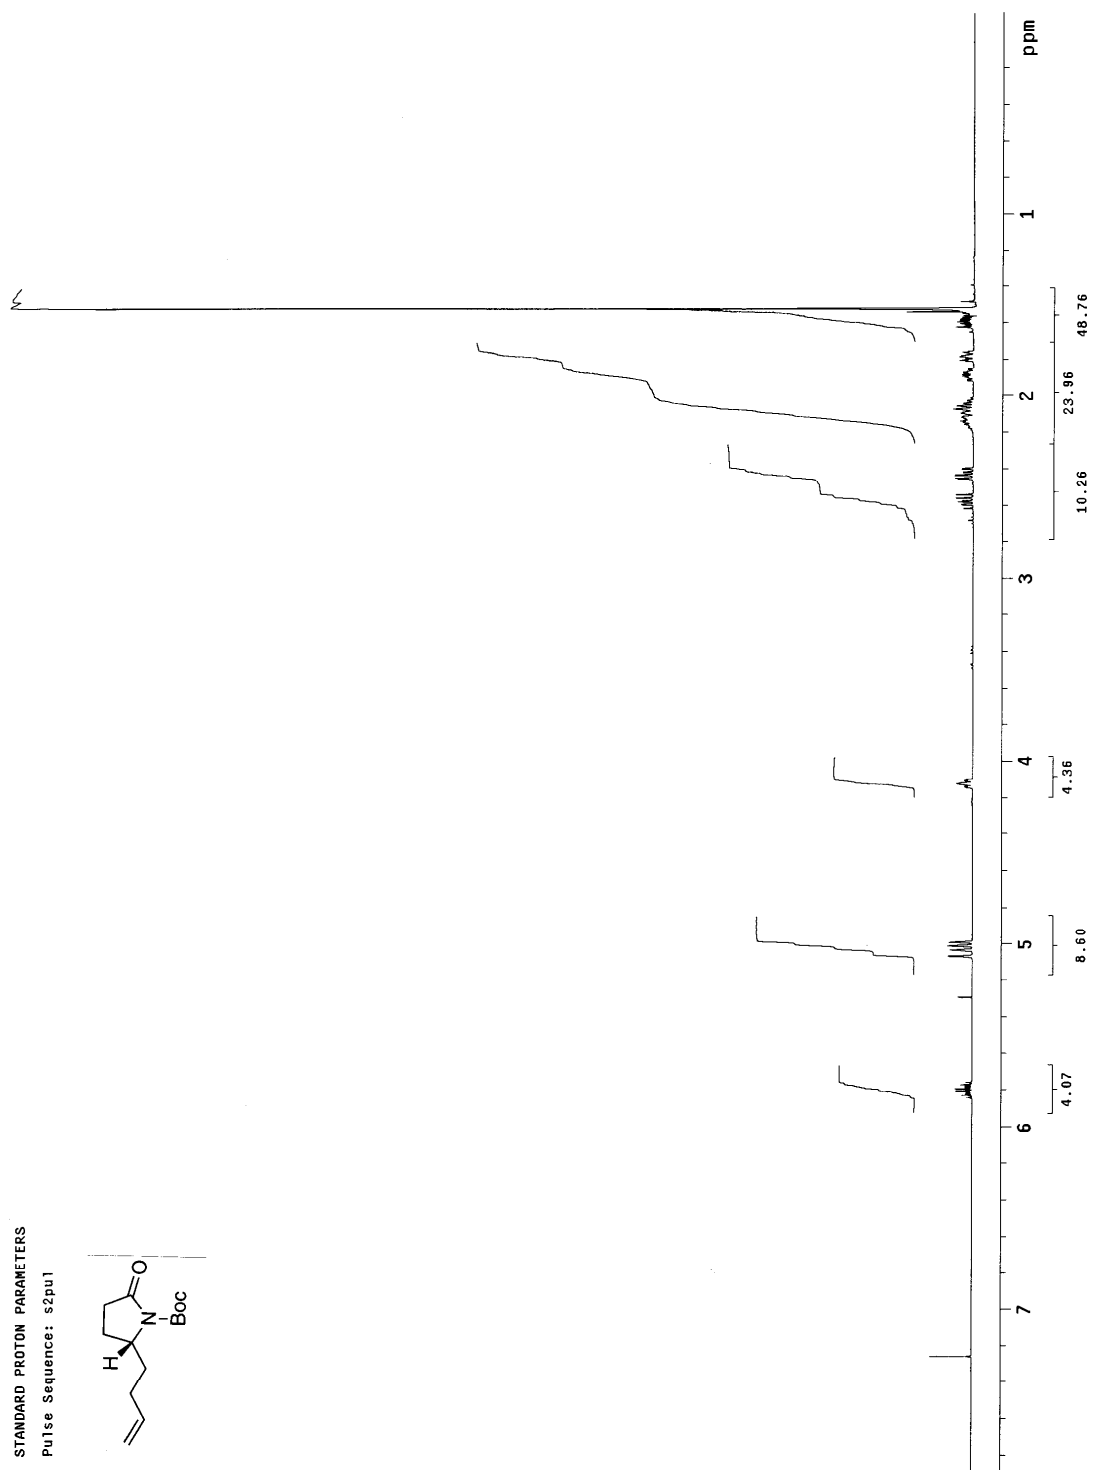

| INDEX | FREQUENCY PPM | HEIGHT    |
|-------|---------------|-----------|
| 1     | 13108.832     | 173.737 S |
| 2     | 11285.457     | 149.306 S |
| 3     | 10310.809     | 138.654 d |
| 4     | 8673.746      | 114.957 k |
| 5     | 6202.893      | 82.210 S  |
| 6     | 5841.502      | 77.421 /  |
| 7     | 5808.581      | 76.980 /  |
| 8     | 5776.841      | 76.563 /  |
| 9     | 4307.025      | 57.083 d  |
| 10    | 2441.677      | 32.361 k  |
| 11    | 2335.469      | 30.953 k  |
| 12    | 2230.482      | 29.562 k  |
| 13    | 2090.093      | 27.701 k  |
| 14    | 1655.496      | 21.941 k  |

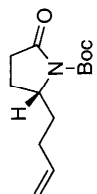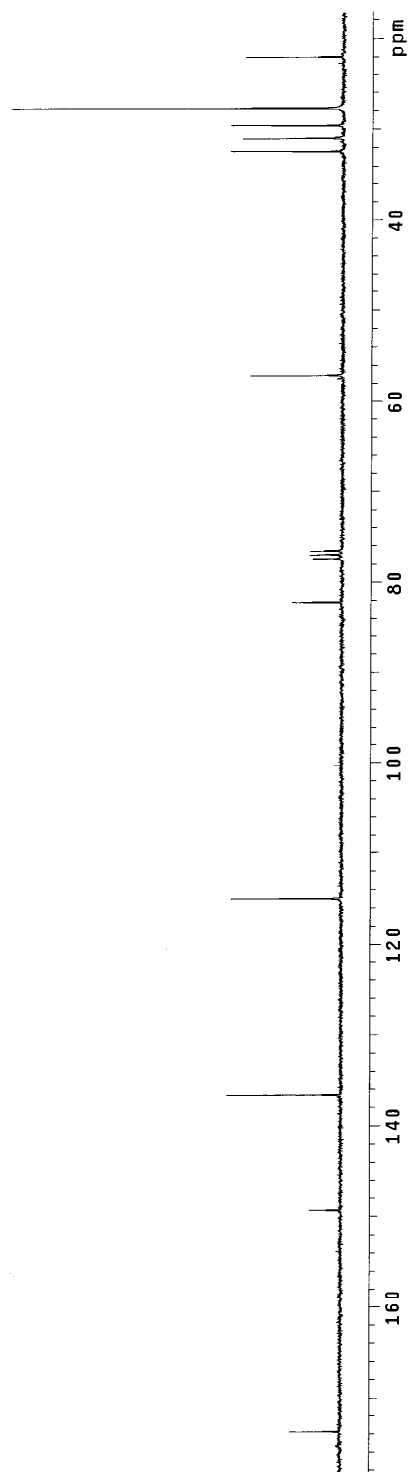

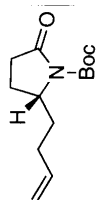

CH3 carbons

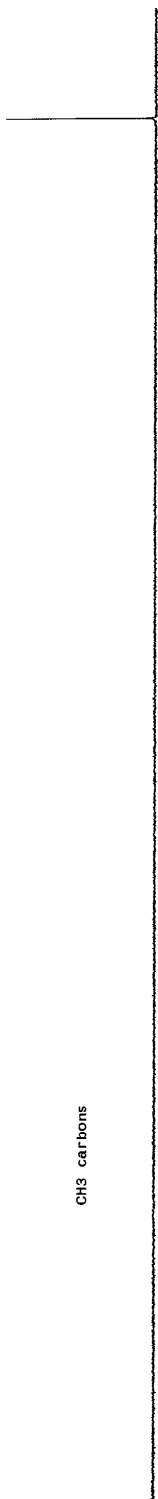

CH2 carbons

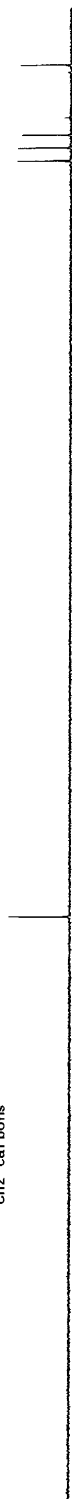

CH carbons

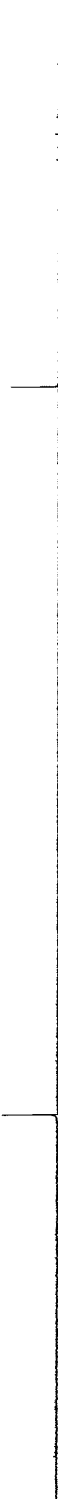

all protonated carbons

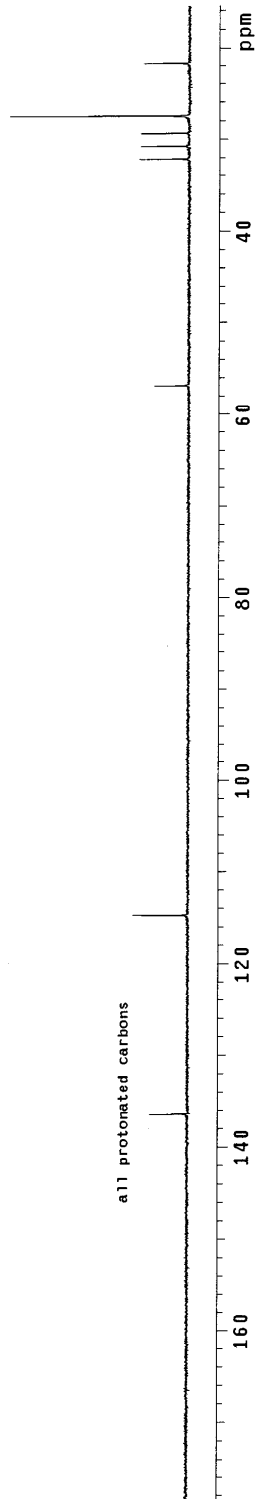

1

Pulse Sequence: s2pu1

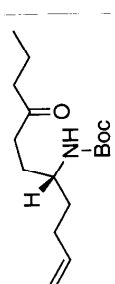**3: R = *n*-Pr**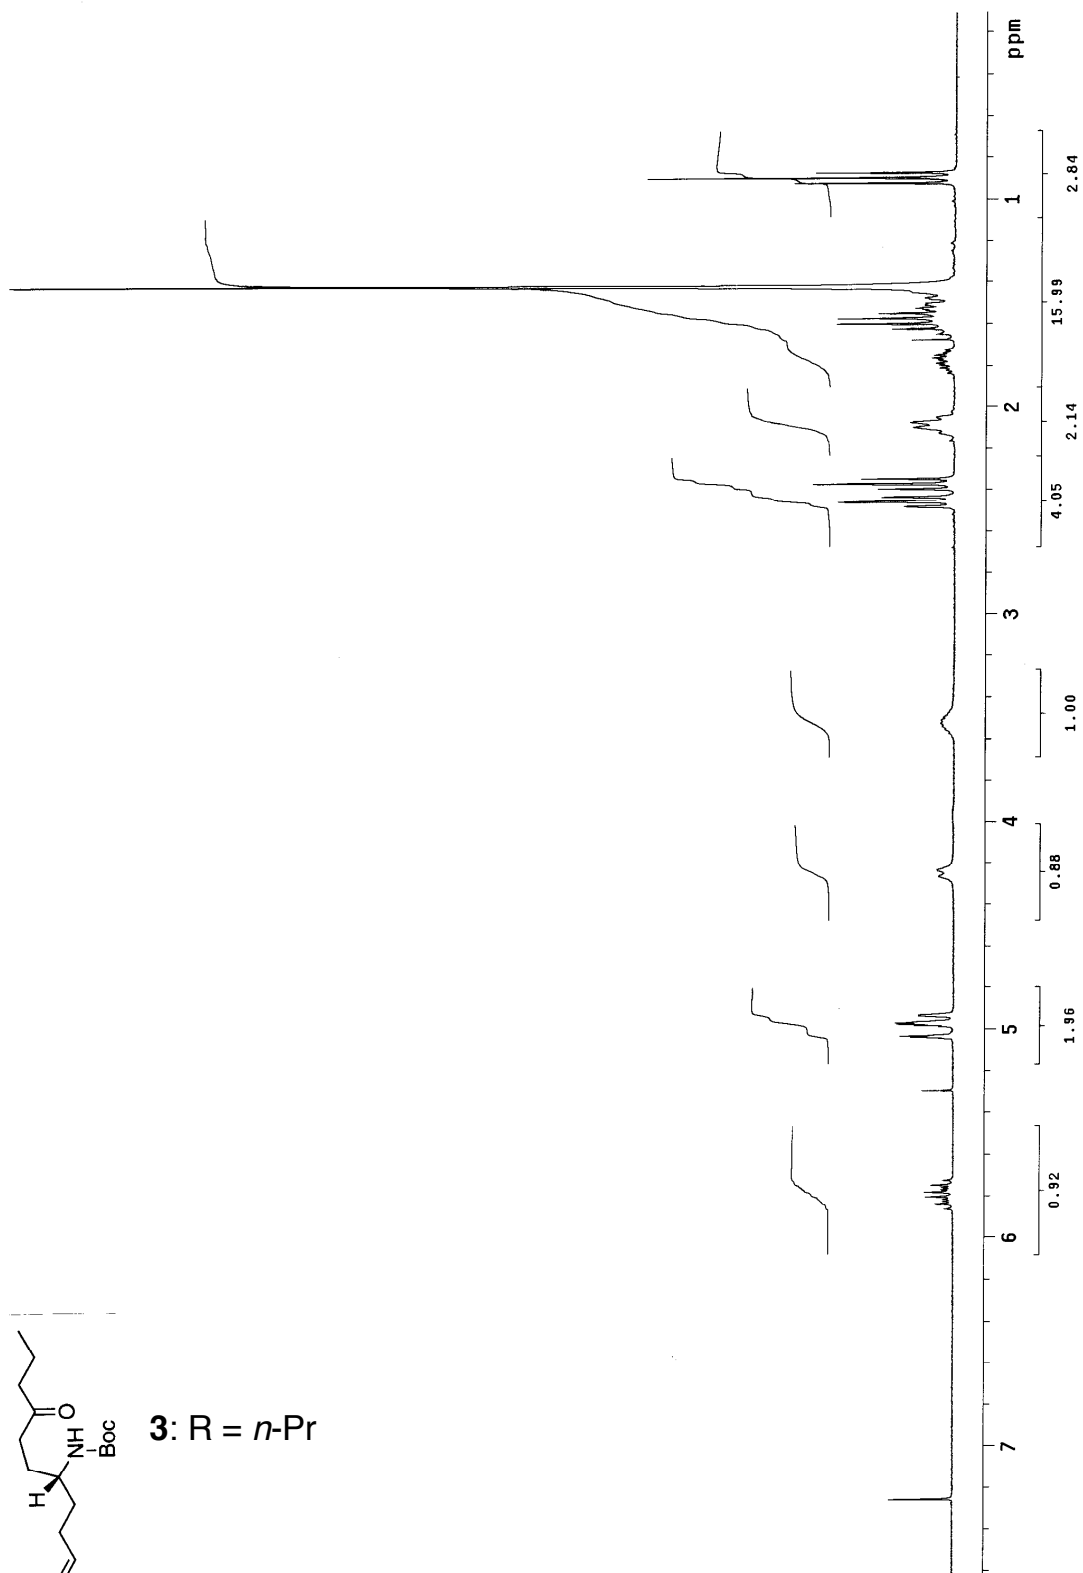

| INDEX | FREQUENCY PPM | HEIGHT   |
|-------|---------------|----------|
| 1     | 15867.788     | 210.3035 |
| 2     | 11724.469     | 155.3505 |
| 3     | 10381.614     | 137.5824 |
| 4     | 8639.564      | 114.5044 |
| 5     | 5922.113      | 78.4895  |
| 6     | 5841.542      | 77.4214  |
| 7     | 5809.801      | 77.0084  |
| 8     | 5778.061      | 76.5794  |
| 9     | 3761.336      | 49.8514  |
| 10    | 3365.804      | 44.6094  |
| 11    | 2951.961      | 39.1244  |
| 12    | 2644.325      | 35.0464  |
| 13    | 2267.105      | 30.0474  |
| 14    | 2187.754      | 28.9954  |
| 15    | 2126.715      | 28.1866  |
| 16    | 1286.820      | 17.0554  |
| 17    | 1023.132      | 13.5606  |

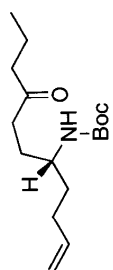

**3: R = *n*-Pr**

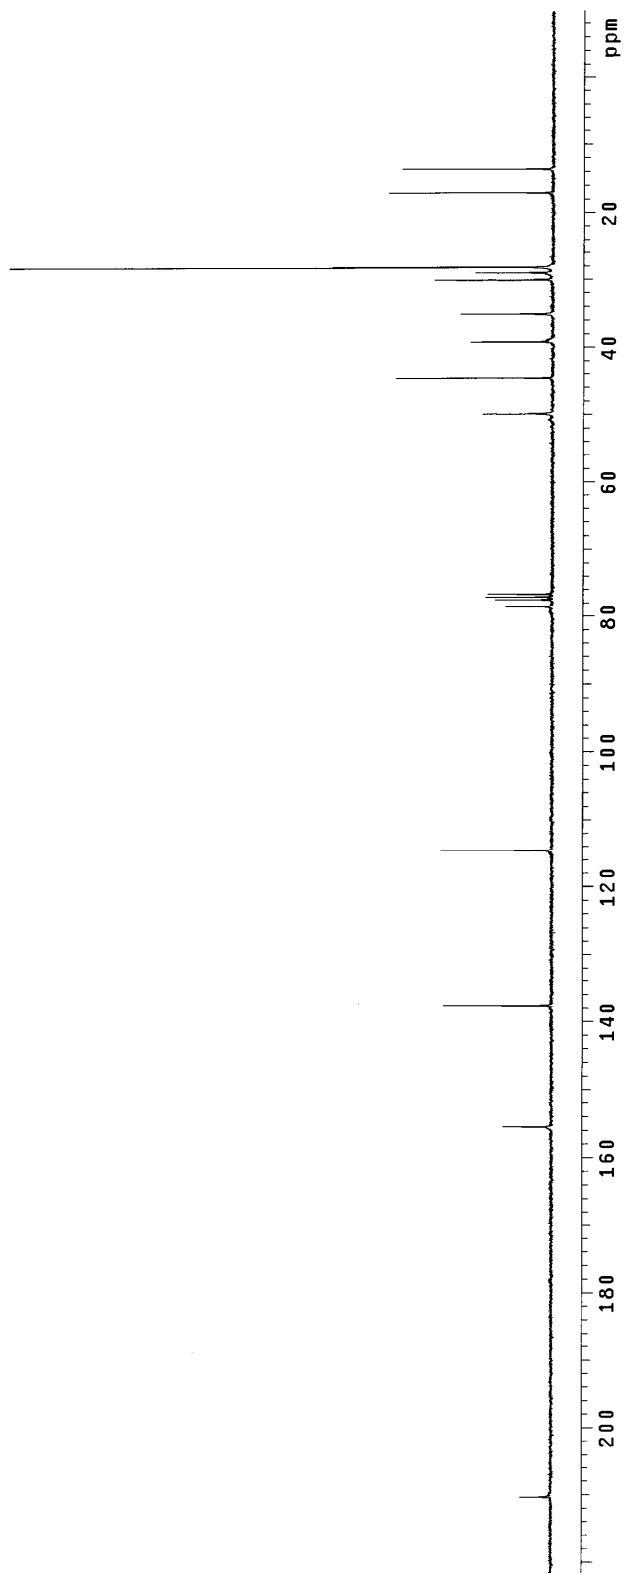



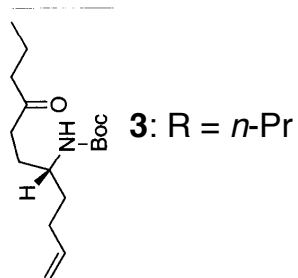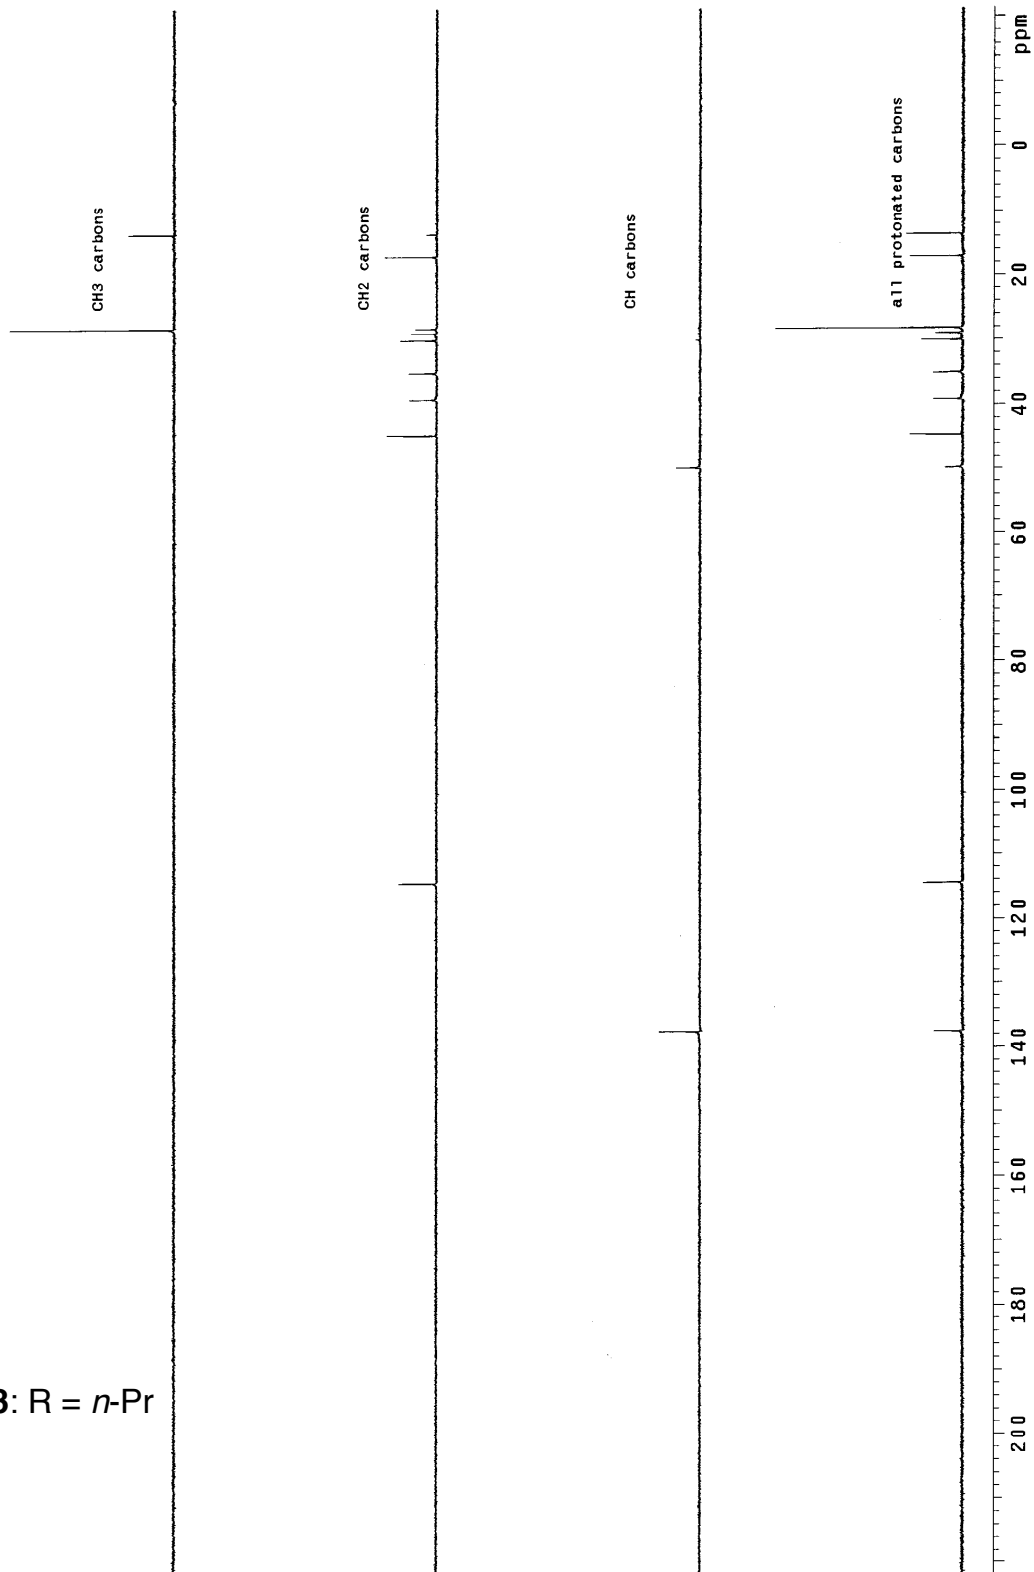

h

Pulse Sequence: s2pul1

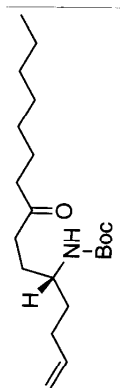**3: R =  $n\text{-C}_7\text{H}_{15}$** 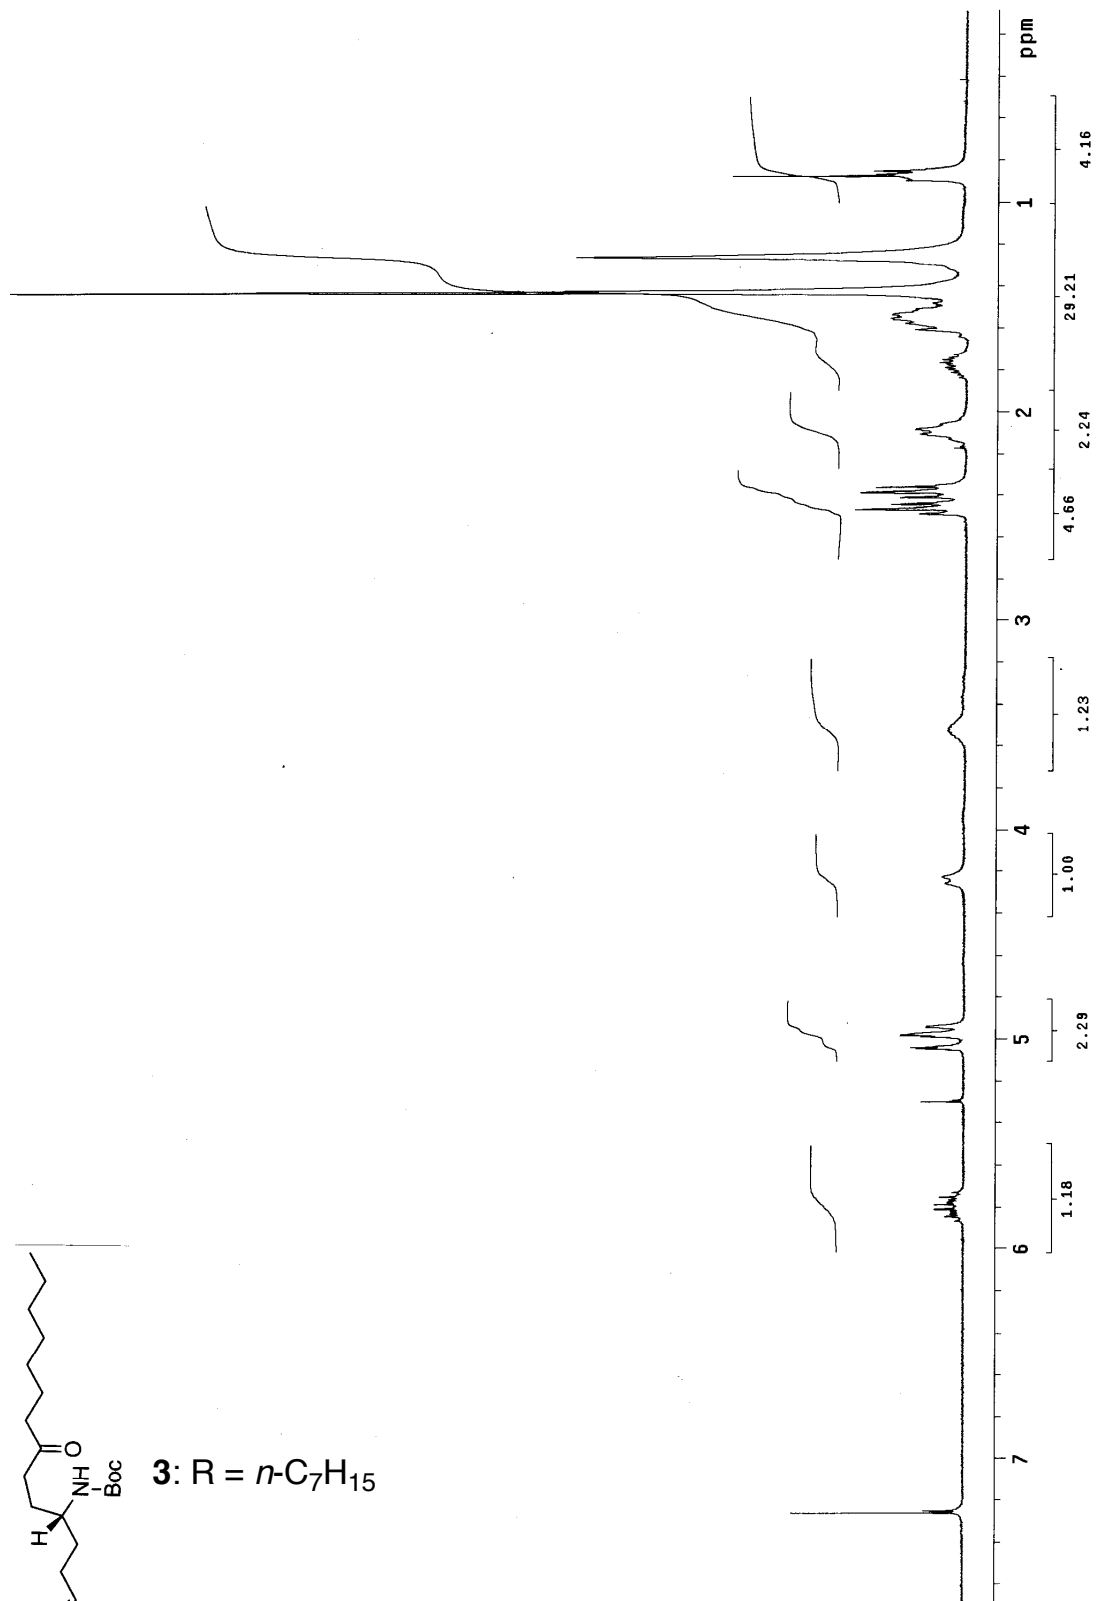

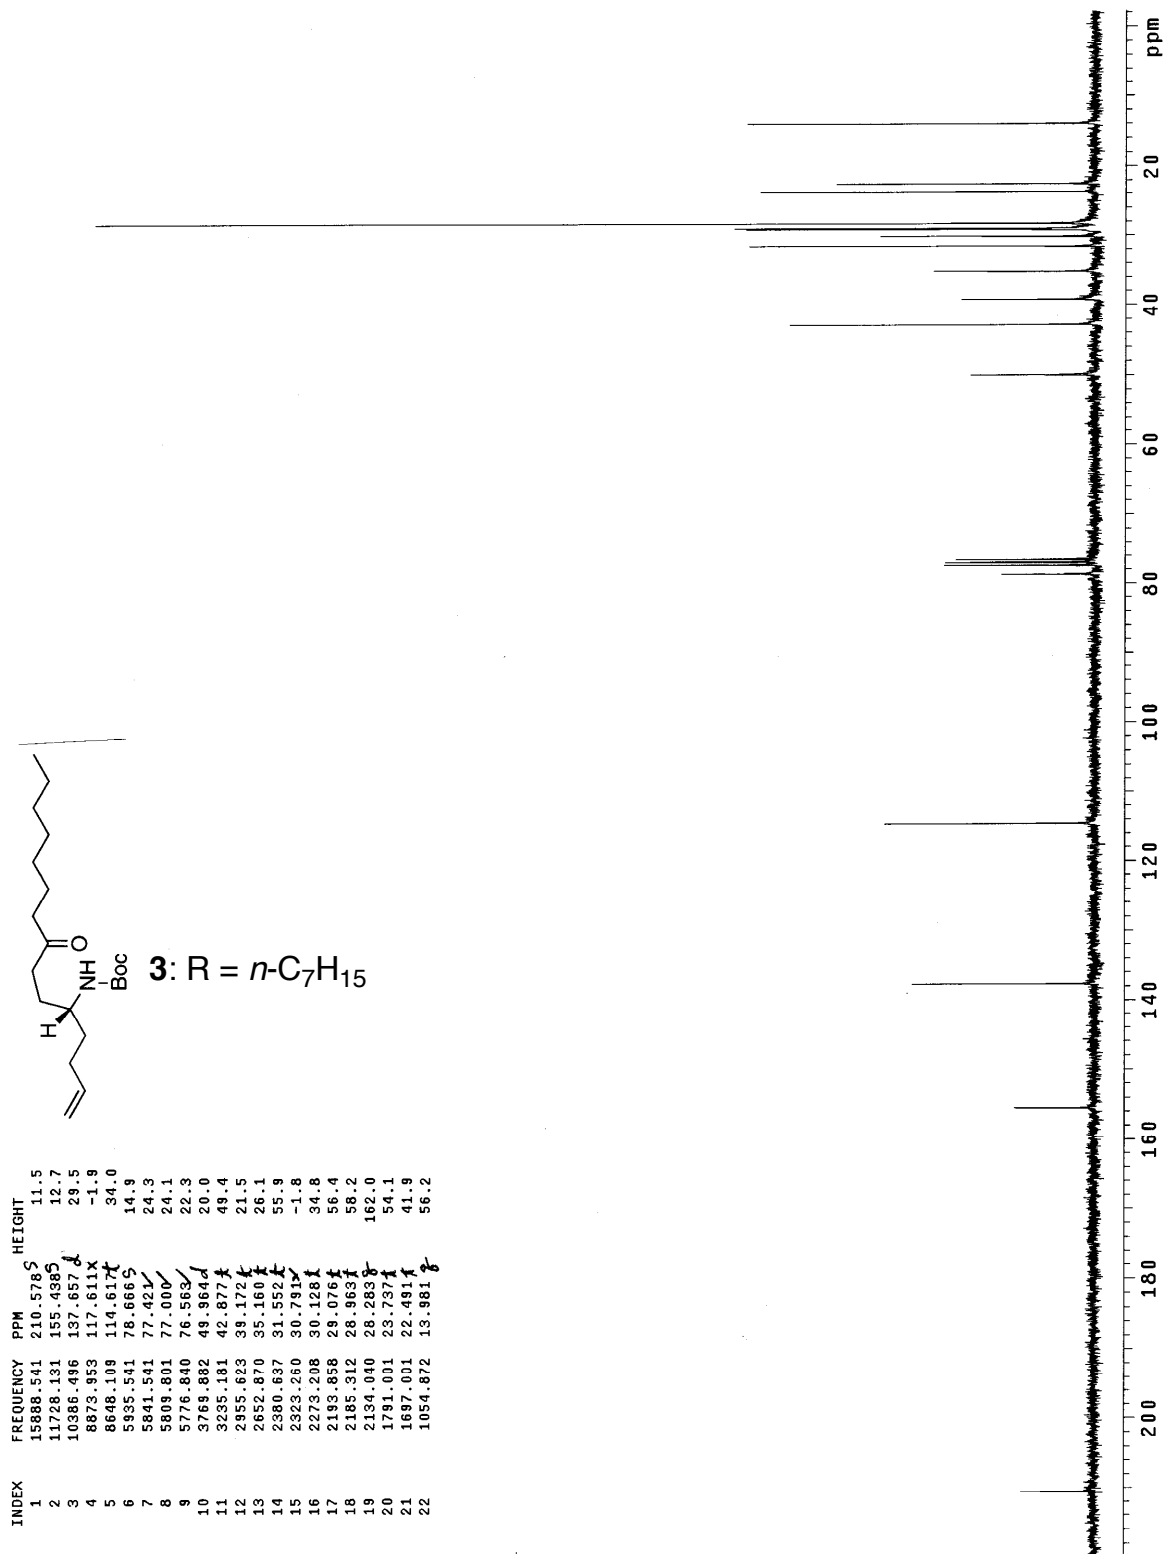

3: R = *n*-C<sub>7</sub>H<sub>15</sub>

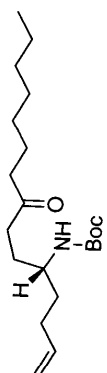

CH3 carbons

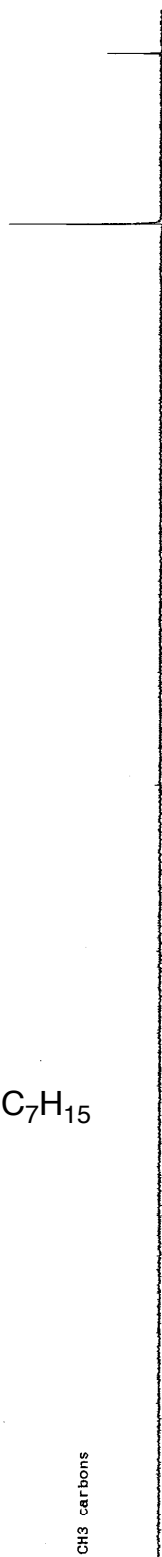

CH2 carbons

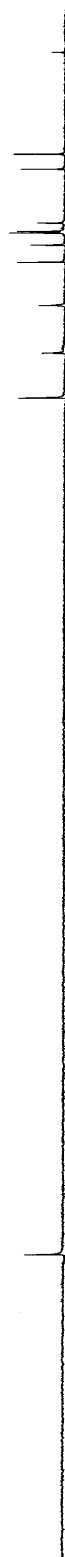

CH carbons

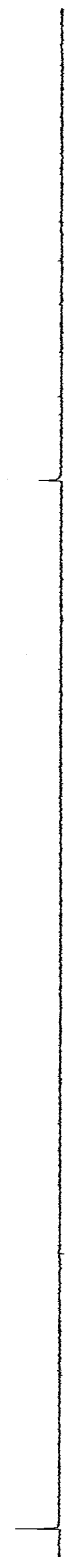

all protonated carbons

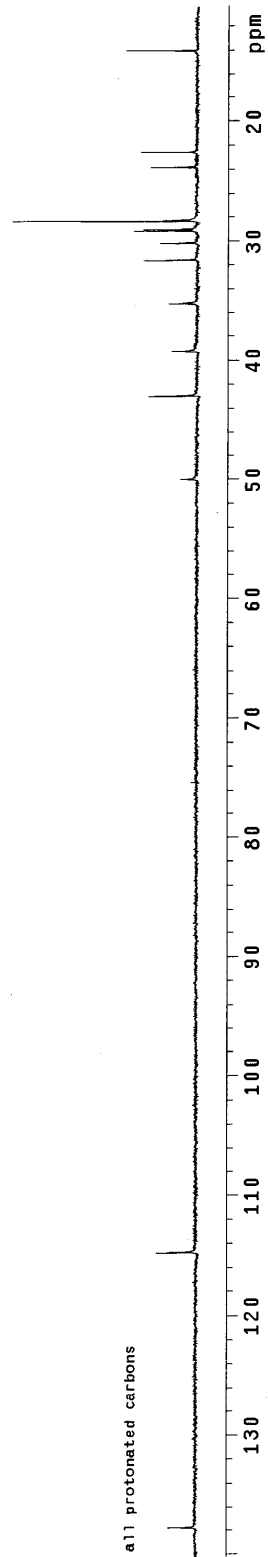

1  
Pulse Sequence: s2pu1

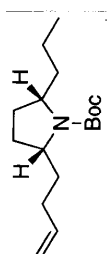

4: R = *n*-Pr

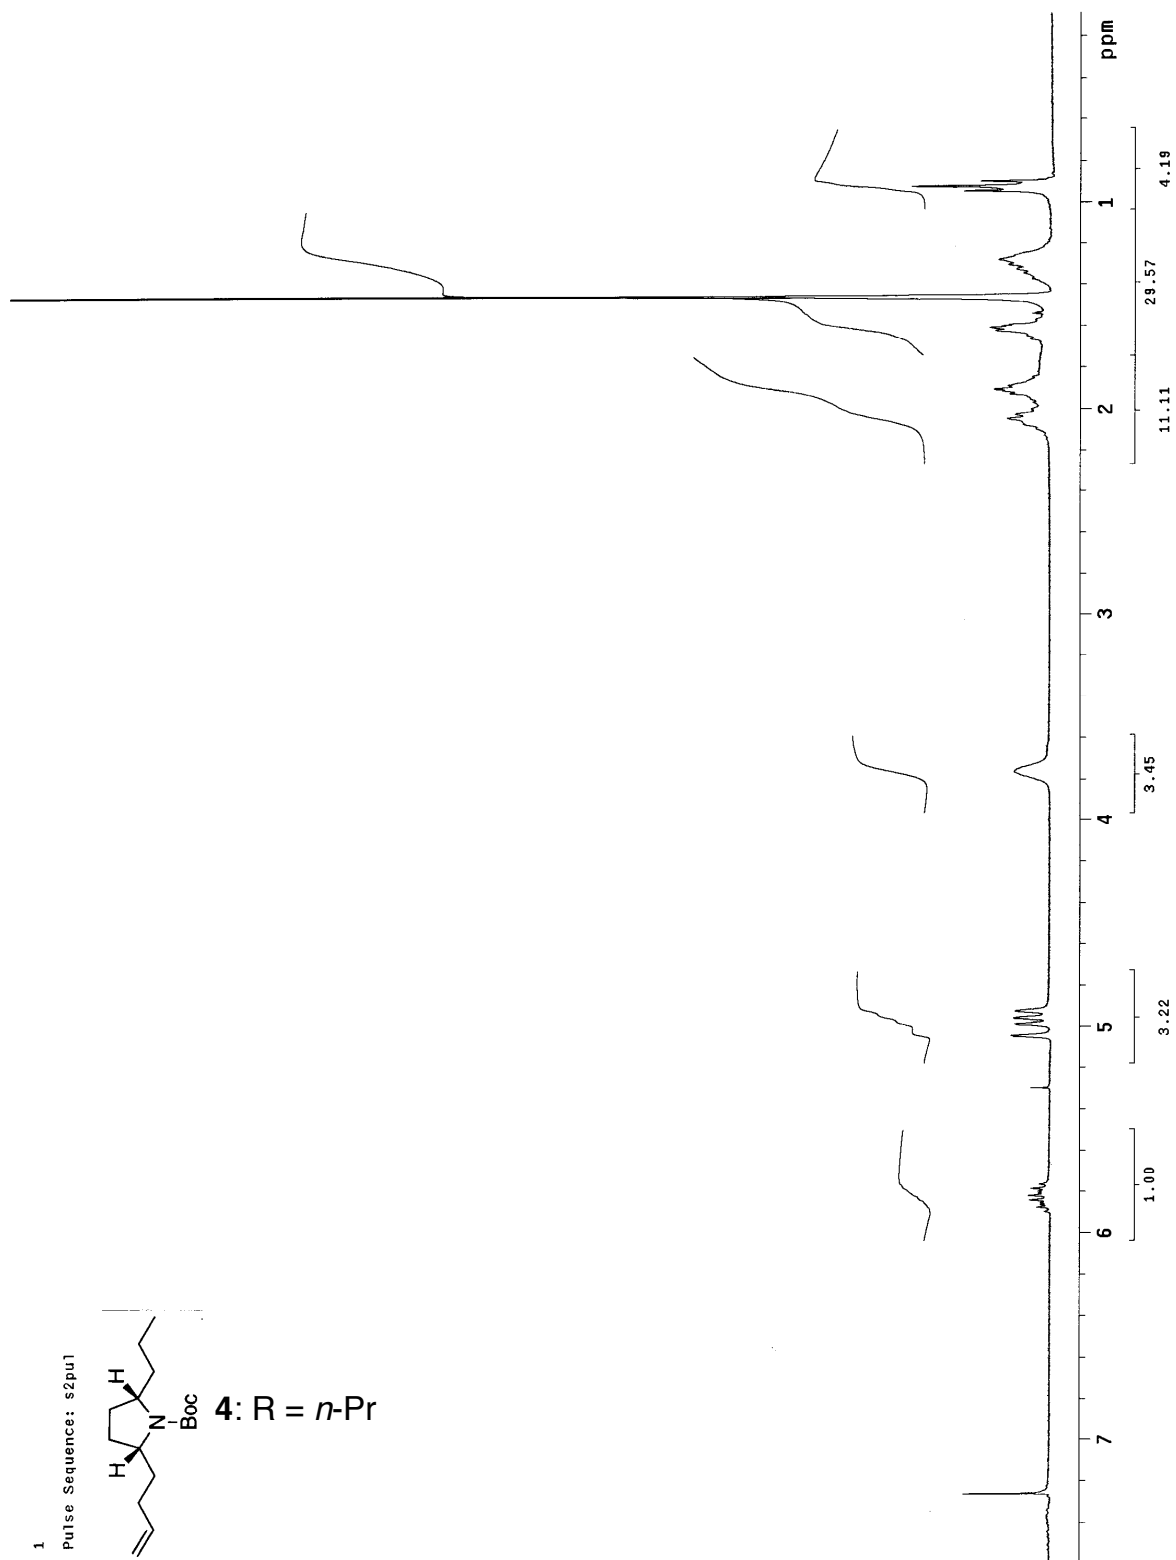

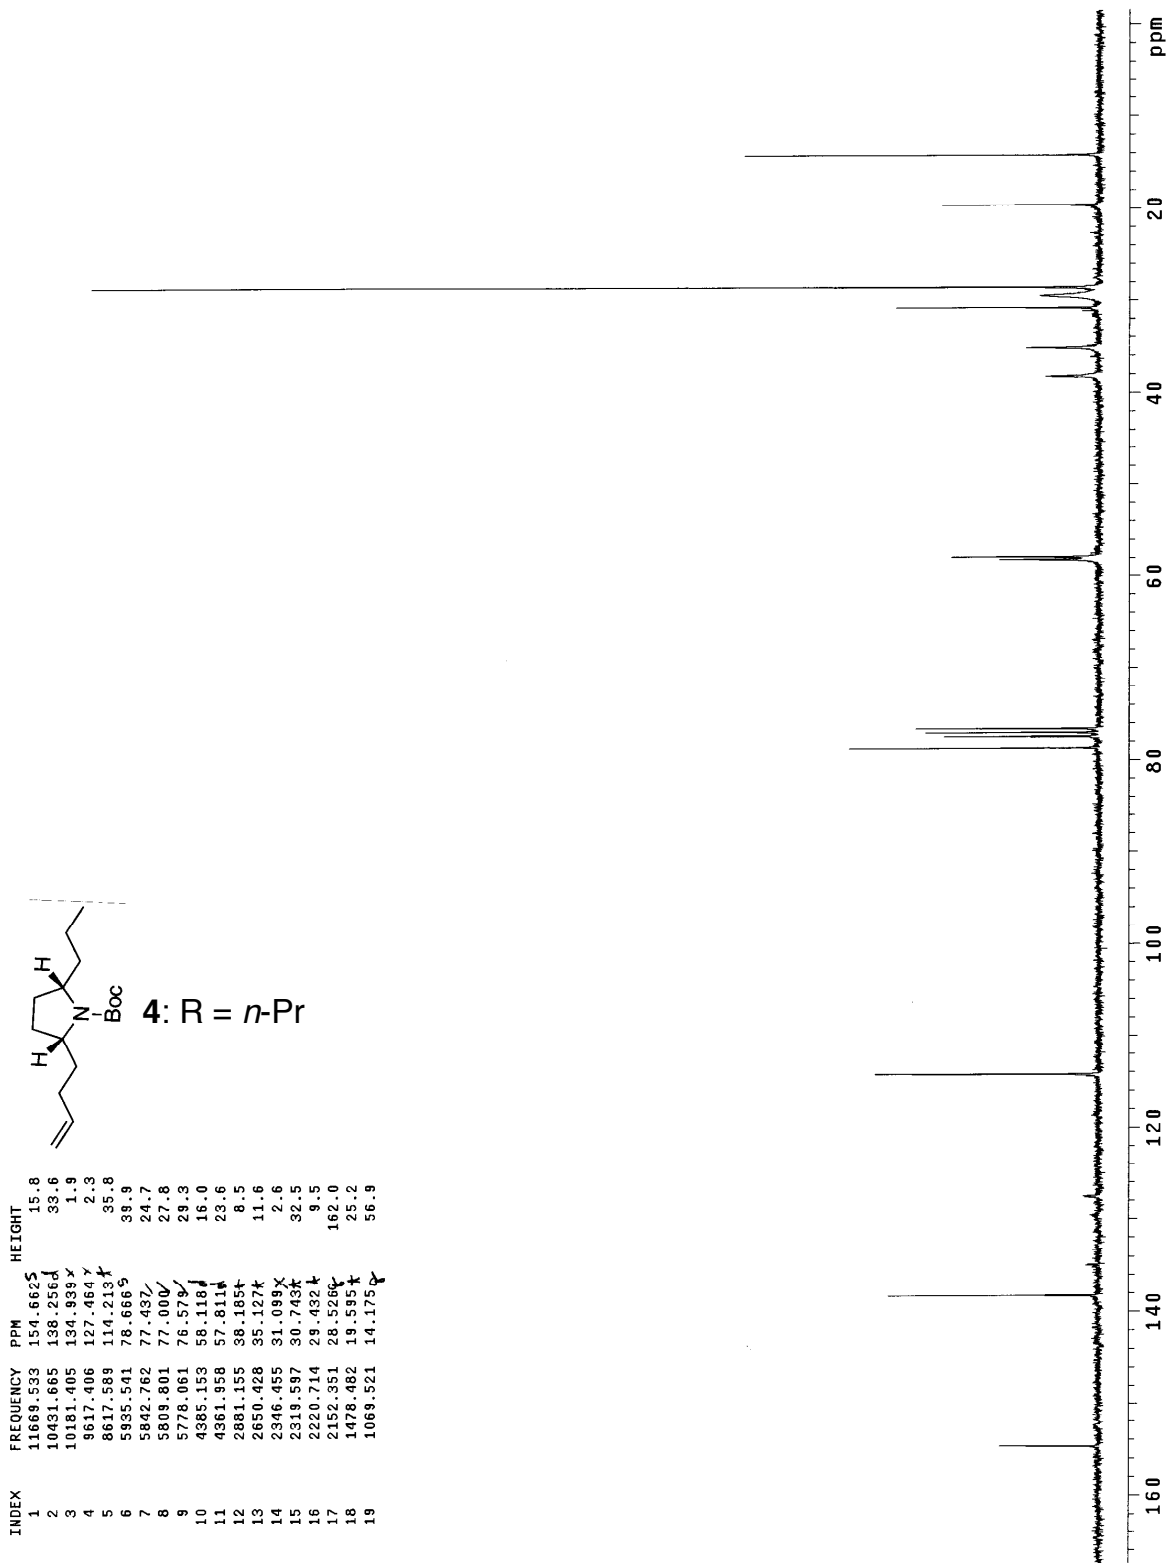

4: R = *n*-Pr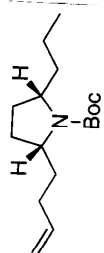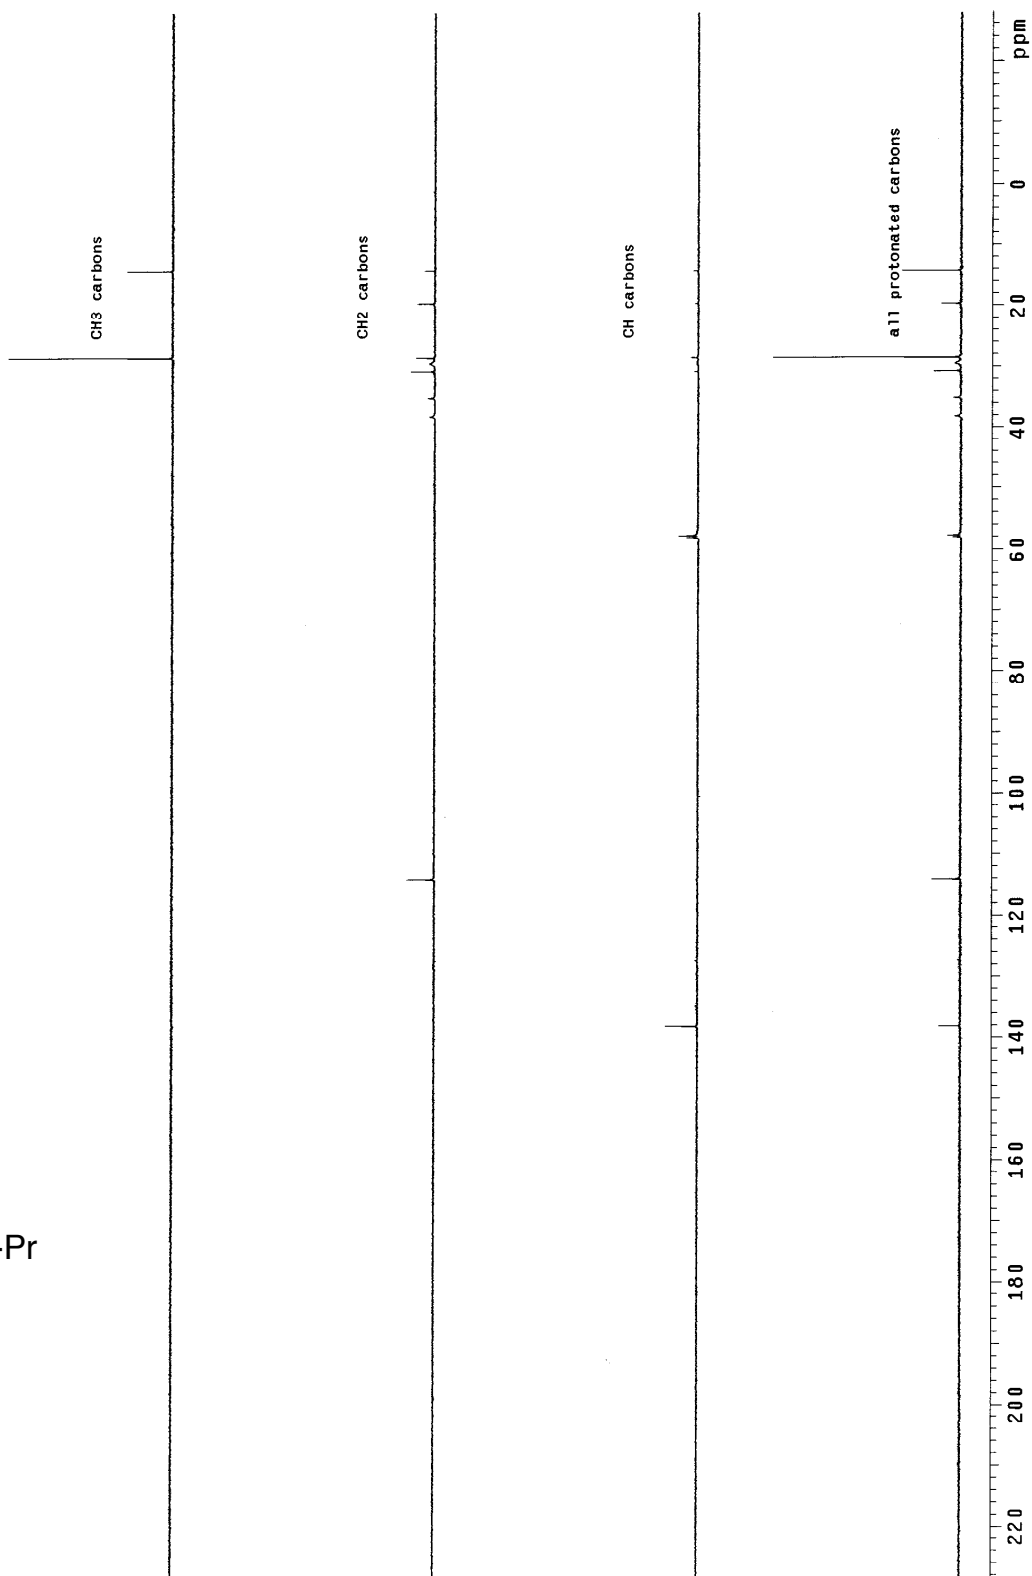

## STANDARD PROTON PARAMETERS

Pulse Sequence: s2pu1

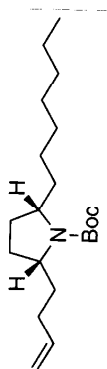**4:** R = *n*-C<sub>7</sub>H<sub>15</sub>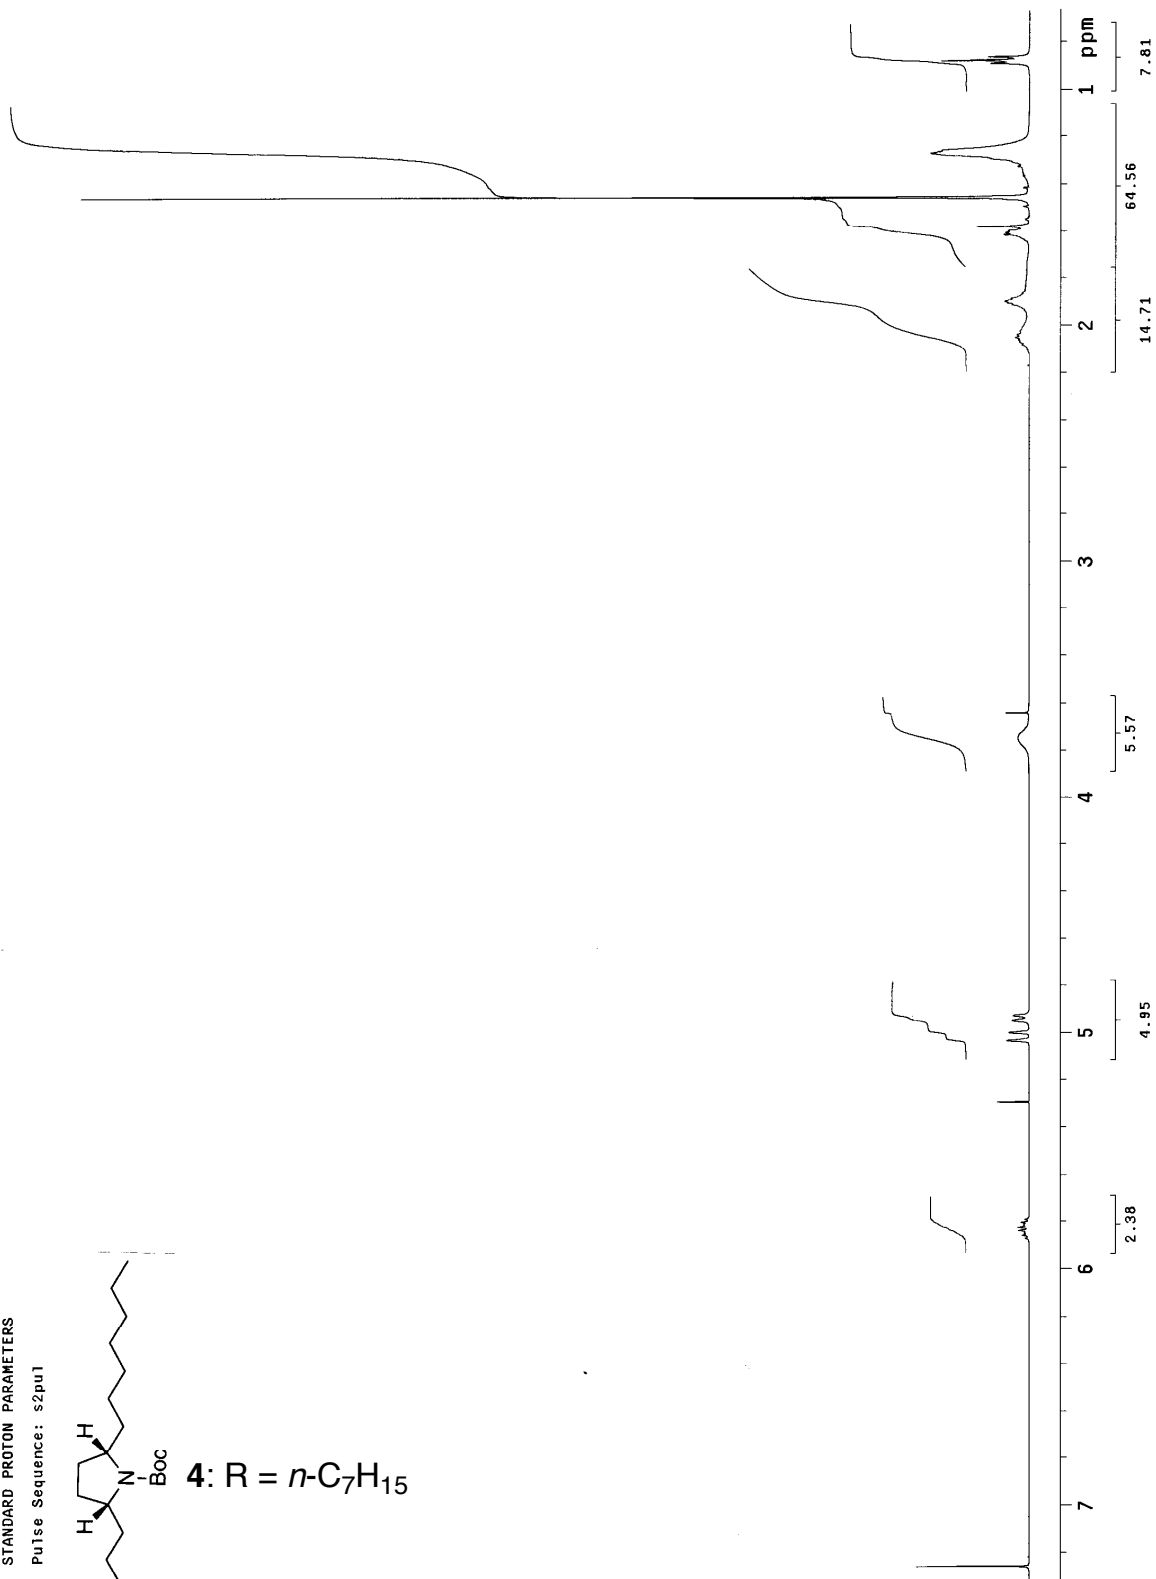



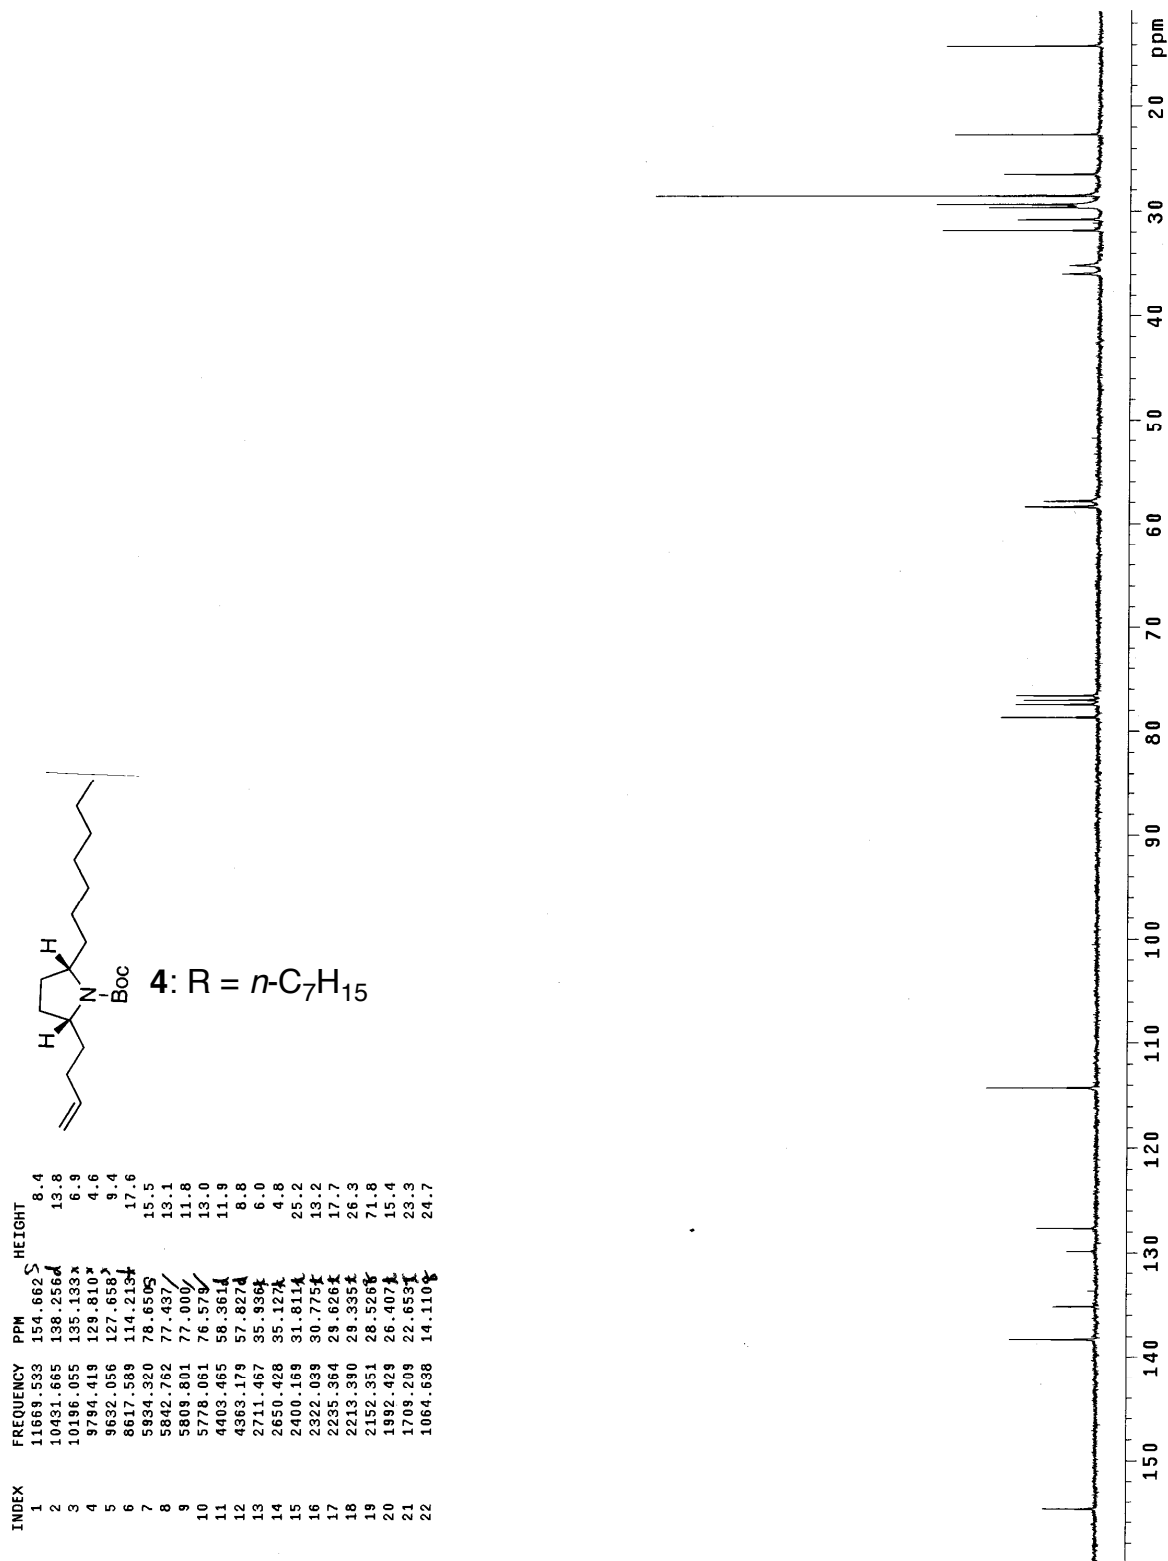

4: R = *n*-C<sub>7</sub>H<sub>15</sub>

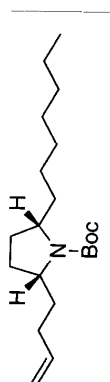

CH<sub>3</sub> carbons

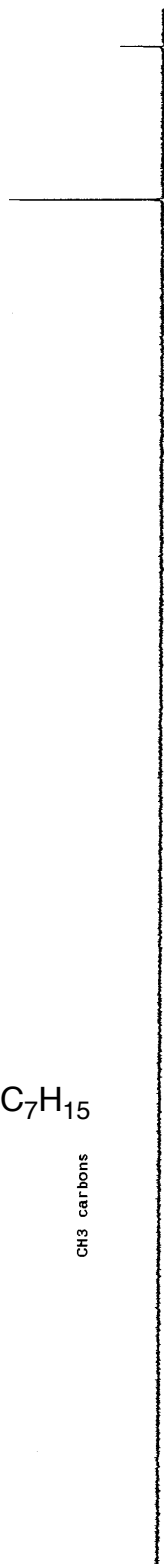

CH<sub>2</sub> carbons

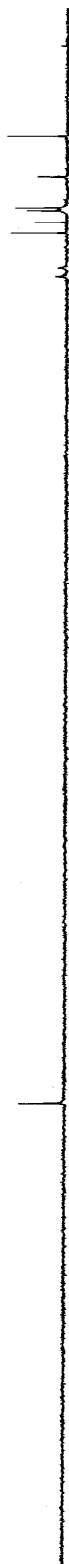

CH carbons

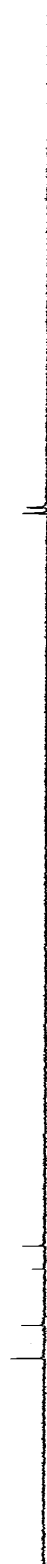

all protonated carbons

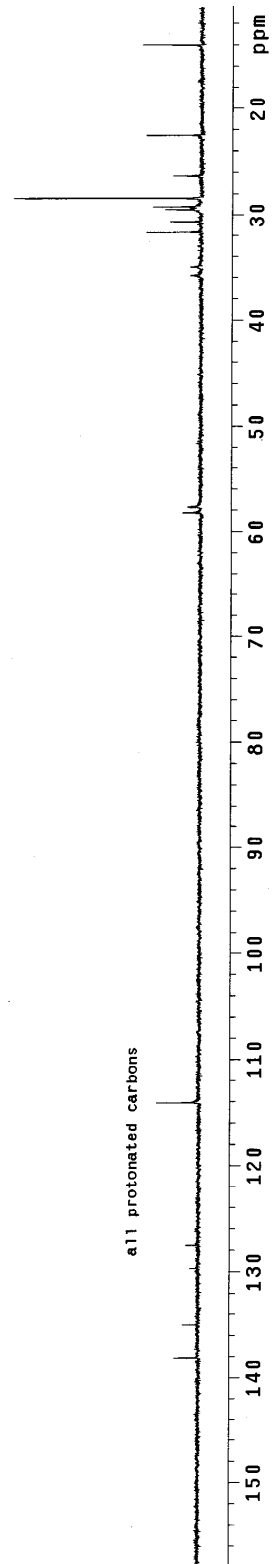

9

Pulse Sequence: s2pu1

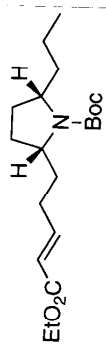**5: R = *n*-Pr**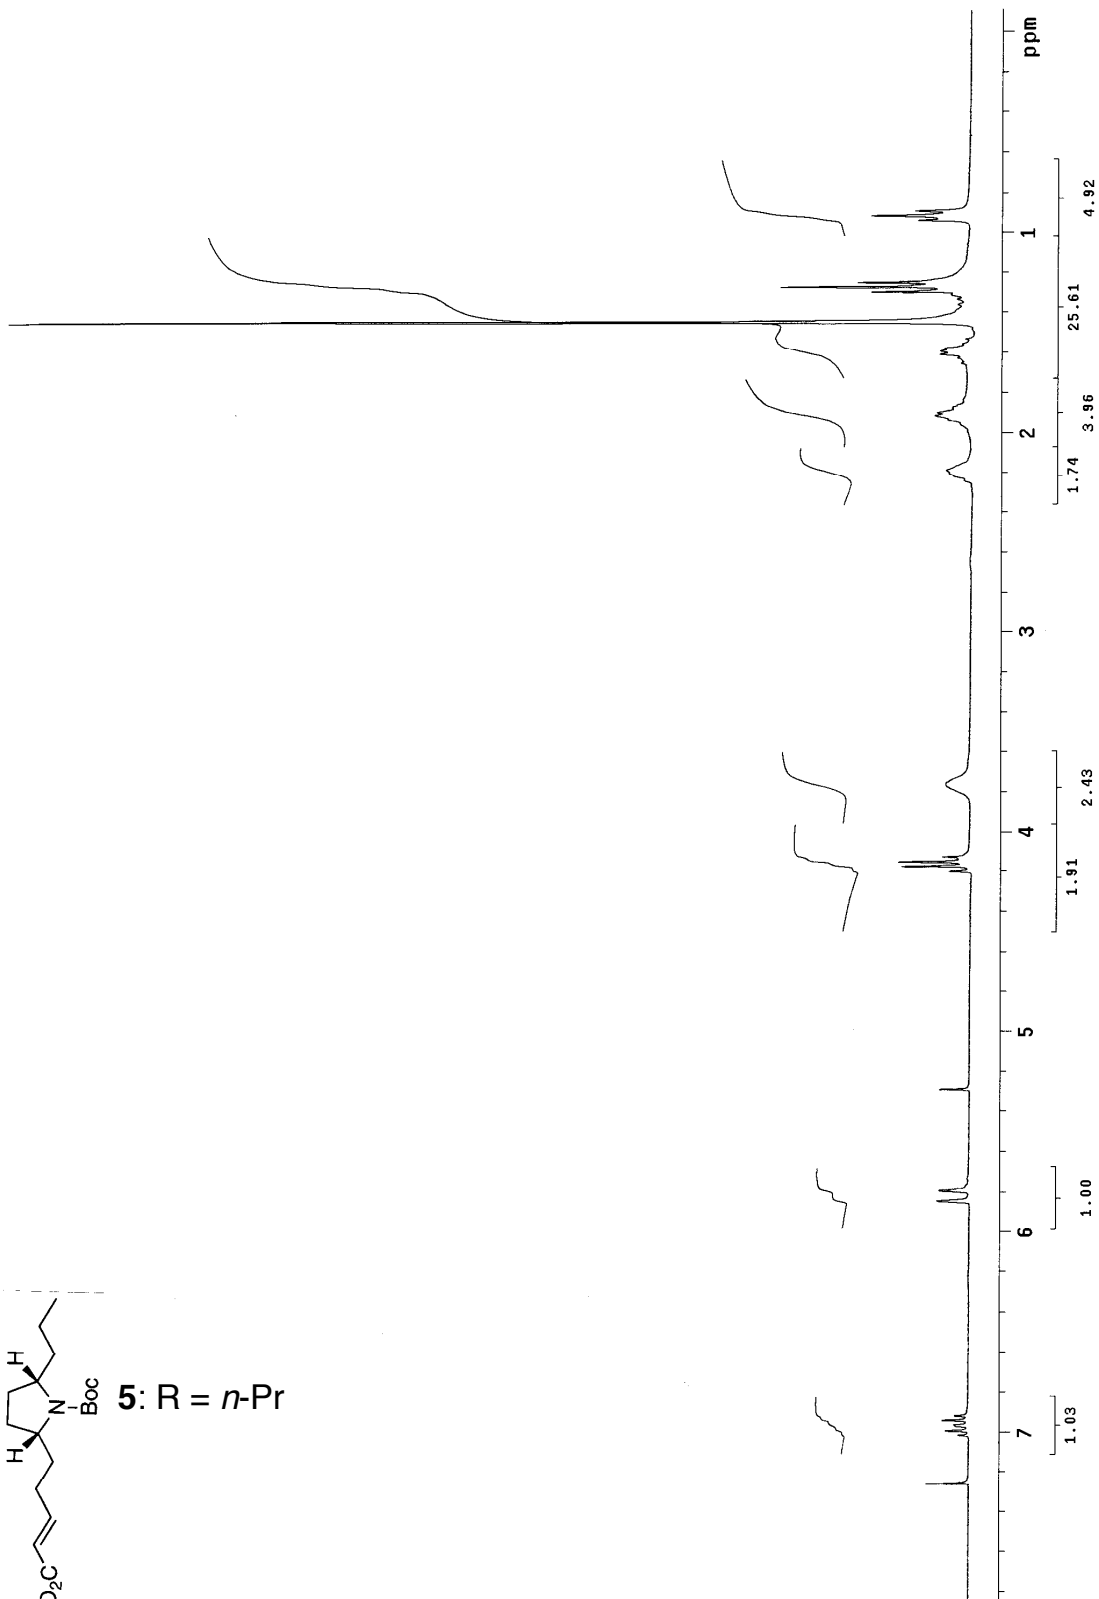

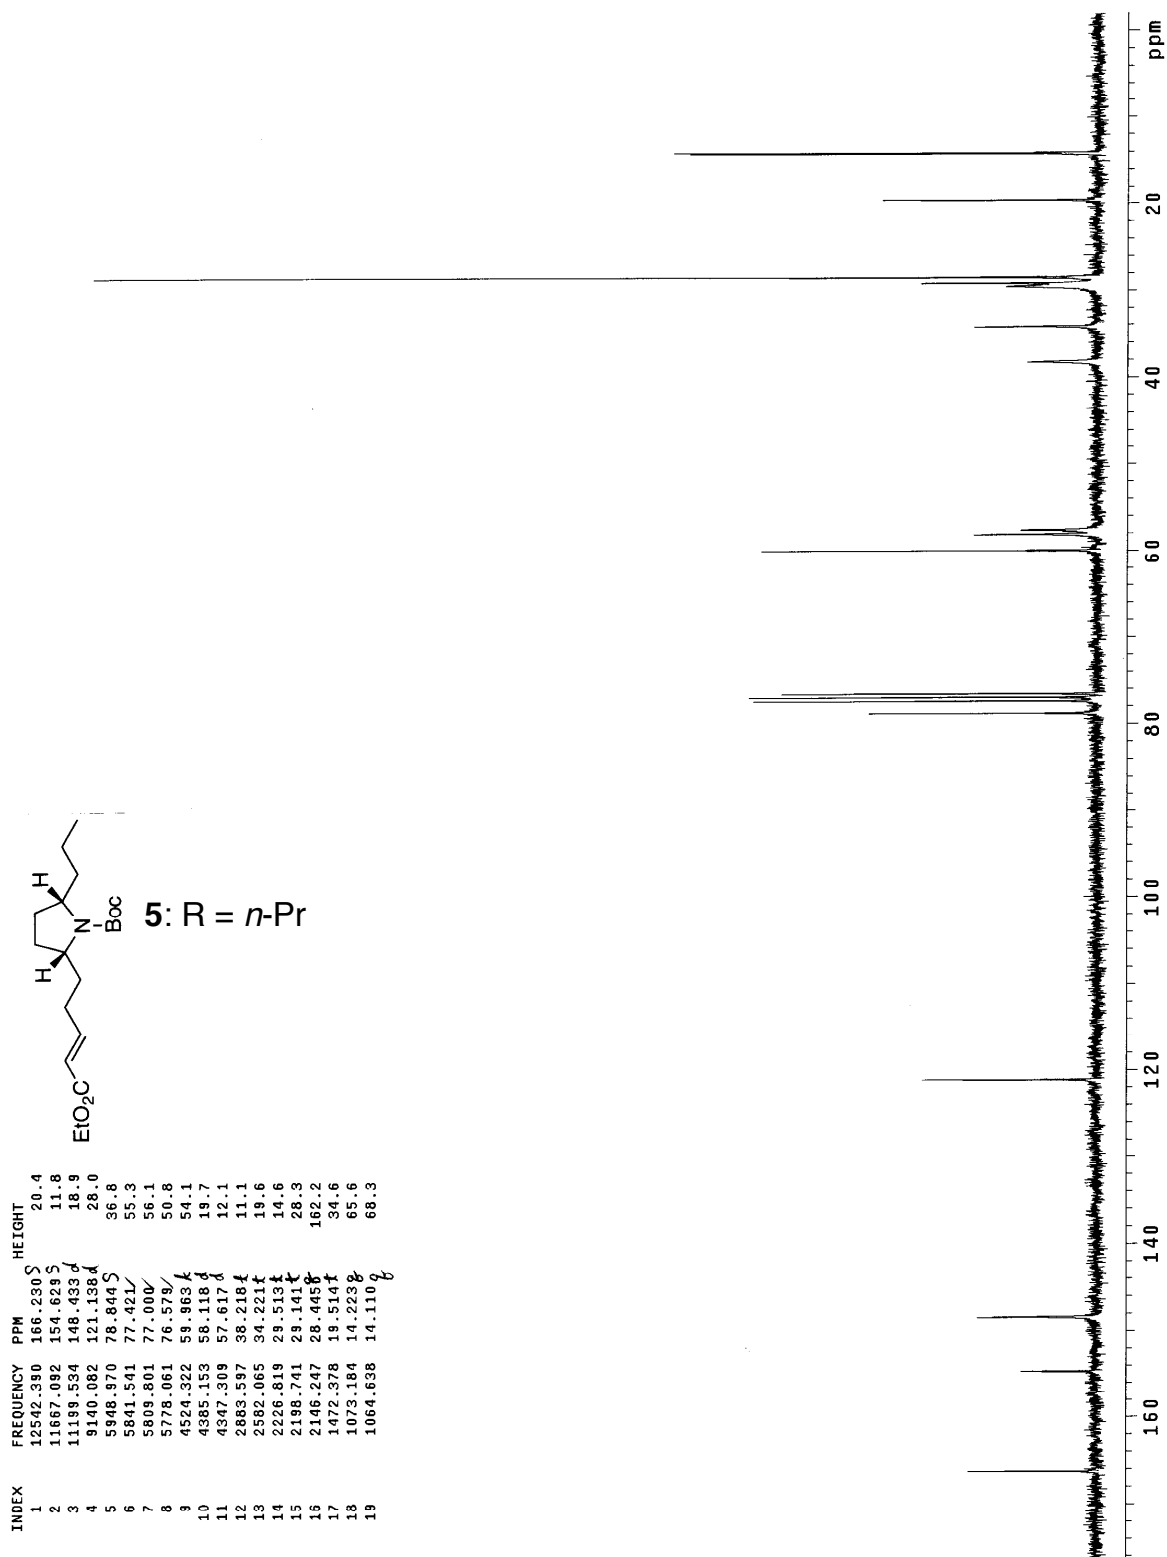

5: R = *n*-Pr

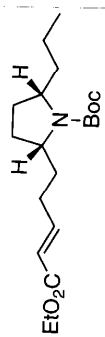

CH<sub>3</sub> carbons

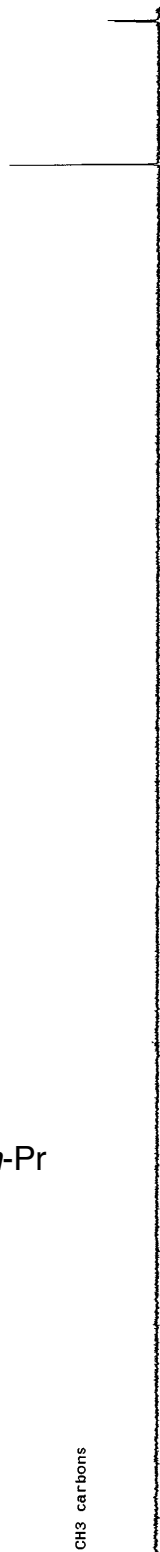

CH<sub>2</sub> carbons

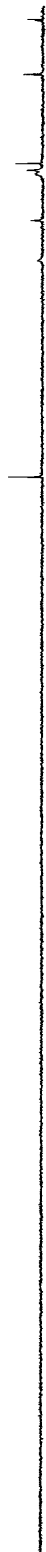

CH carbons

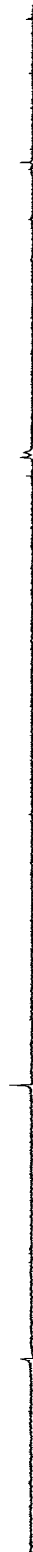

all protonated carbons

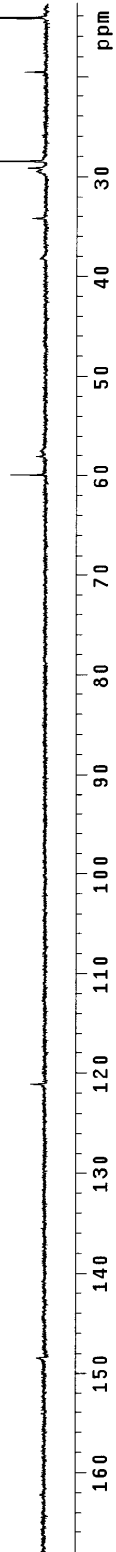

1

PulSe Sequence: s2pu1

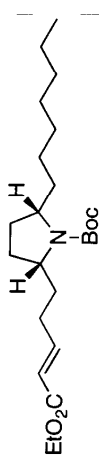**5:** R = *n*-C<sub>7</sub>H<sub>15</sub>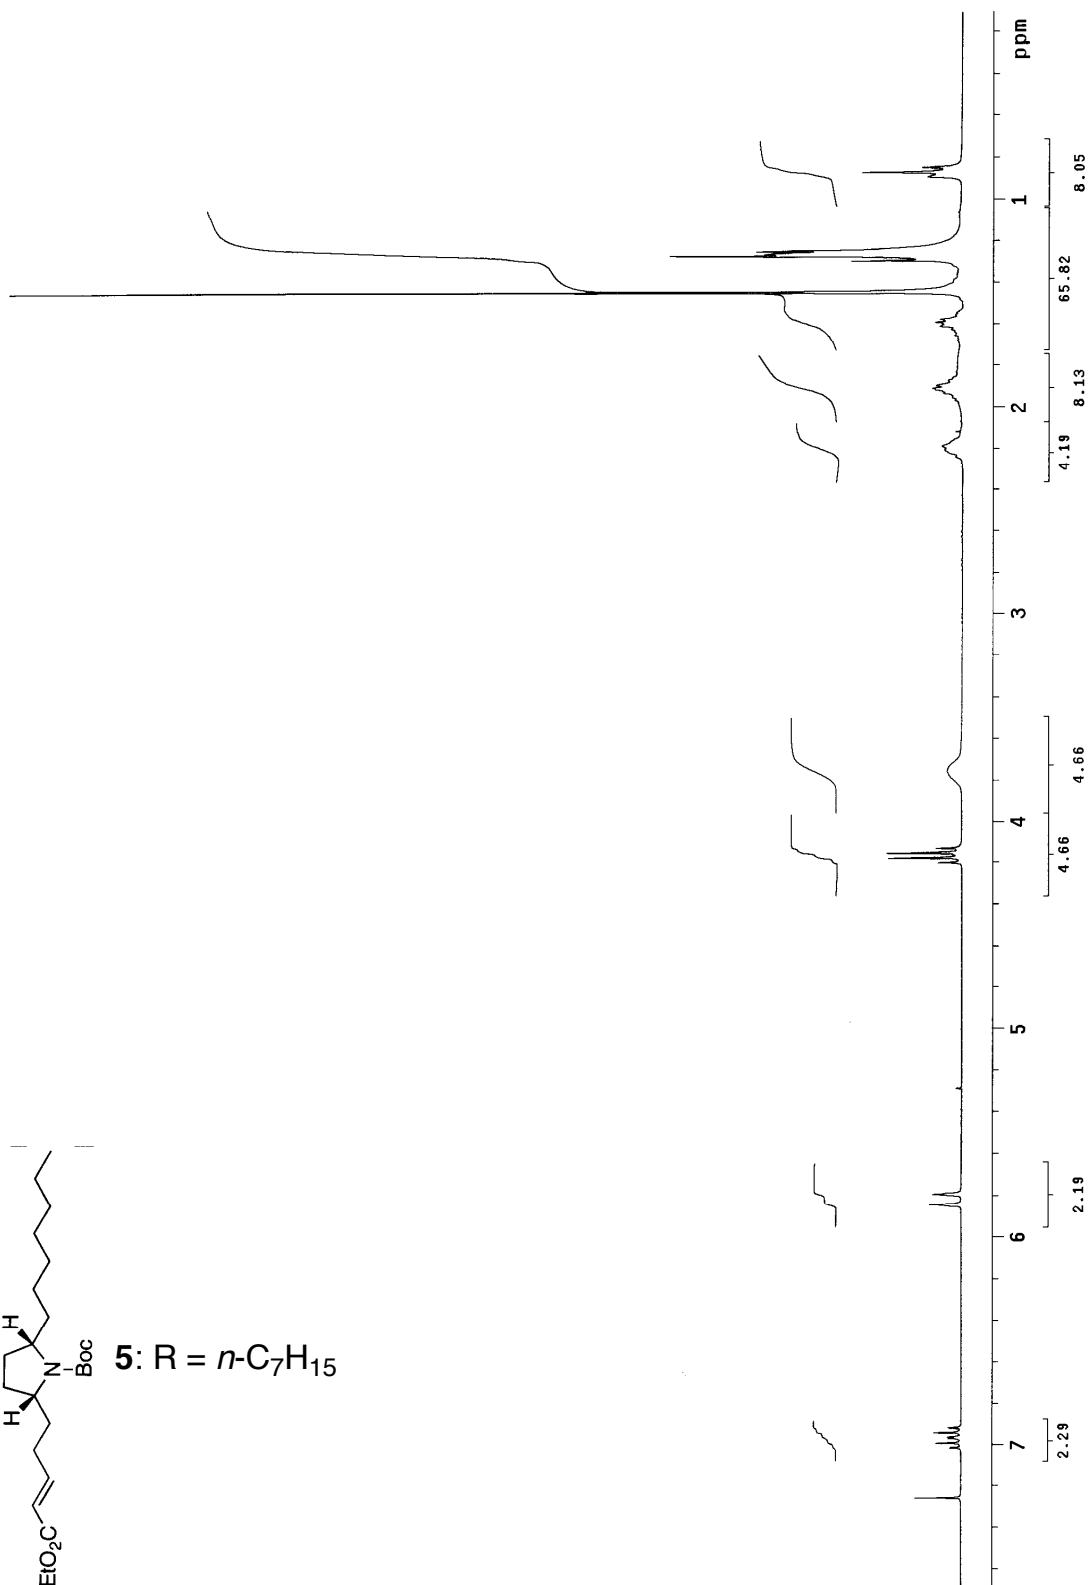

| INDEX | FREQUENCY | PPM                  | HEIGHT |
|-------|-----------|----------------------|--------|
| 1     | 12519.195 | 165.923 <sup>S</sup> | 10.1   |
| 2     | 11651.222 | 154.419 <sup>S</sup> | 4.9    |
| 3     | 11180.002 | 148.174 <sup>d</sup> | 7.2    |
| 4     | 9130.317  | 121.008 <sup>d</sup> | 10.9   |
| 5     | 5929.438  | 78.586 <sup>S</sup>  | 18.4   |
| 6     | 5841.542  | 77.421 <sup>r</sup>  | 12.5   |
| 7     | 5809.801  | 77.000 <sup>r</sup>  | 12.0   |
| 8     | 5776.640  | 76.569 <sup>r</sup>  | 10.9   |
| 9     | 4504.790  | 59.704 <sup>d</sup>  | 21.0   |
| 10    | 4391.258  | 58.199 <sup>d</sup>  | 11.5   |
| 11    | 4333.881  | 57.439 <sup>d</sup>  | 4.5    |
| 12    | 2700.481  | 35.791 <sup>r</sup>  | 6.0    |
| 13    | 2571.078  | 34.076 <sup>r</sup>  | 7.7    |
| 14    | 2361.658  | 31.568 <sup>r</sup>  | 27.3   |
| 15    | 2215.832  | 29.367 <sup>r</sup>  | 25.6   |
| 16    | 2195.079  | 29.092 <sup>r</sup>  | 27.6   |
| 17    | 2186.533  | 28.979 <sup>r</sup>  | 11.0   |
| 18    | 2132.819  | 28.267 <sup>r</sup>  | 81.2   |
| 19    | 1972.897  | 26.148 <sup>r</sup>  | 17.6   |
| 20    | 1690.898  | 22.410 <sup>r</sup>  | 29.4   |
| 21    | 1059.756  | 14.045 <sup>r</sup>  | 28.8   |
| 22    | 1047.548  | 13.884 <sup>r</sup>  | 28.5   |

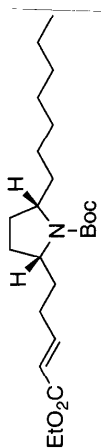

5: R = *n*-C<sub>7</sub>H<sub>15</sub>

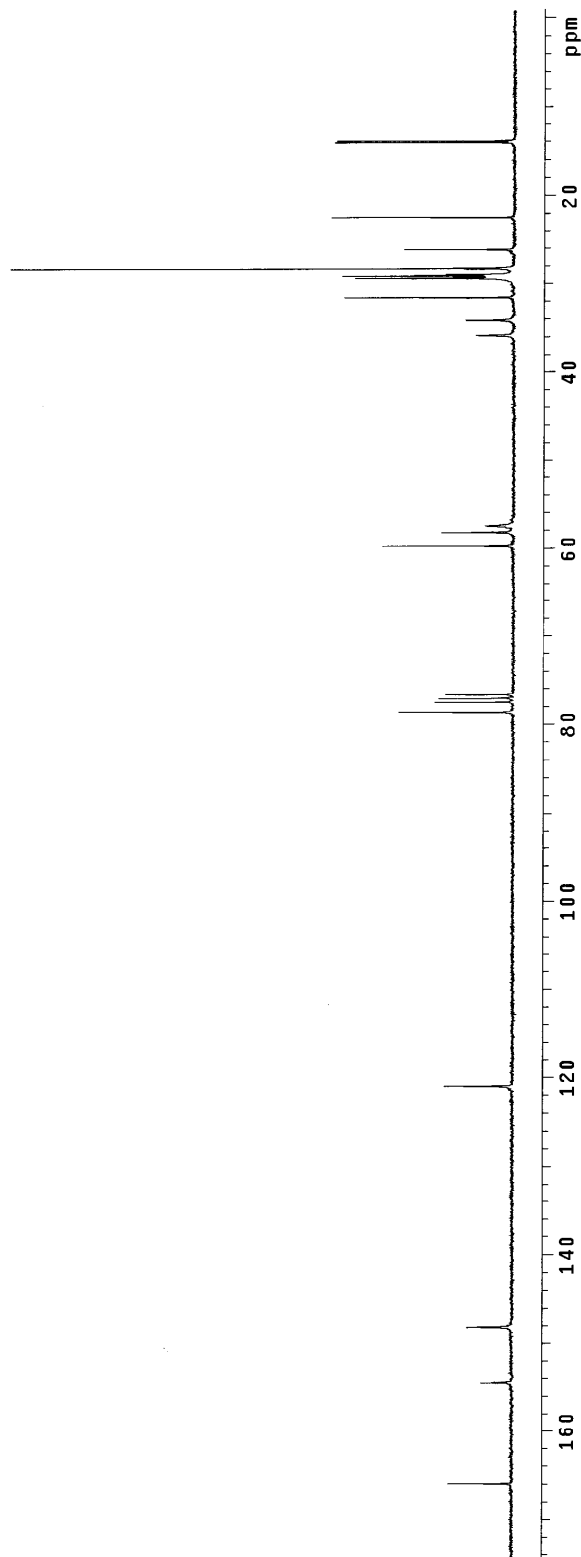

5: R = *n*-C<sub>7</sub>H<sub>15</sub>

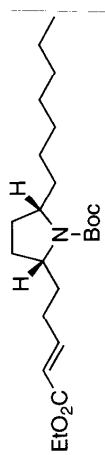

CH<sub>3</sub> carbons

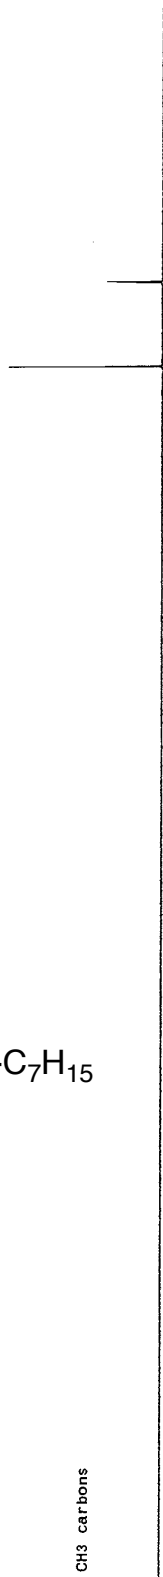

CH<sub>2</sub> carbons

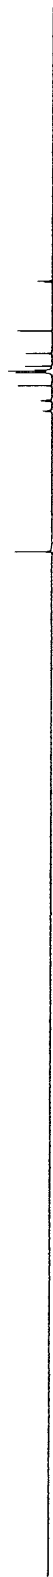

CH carbons

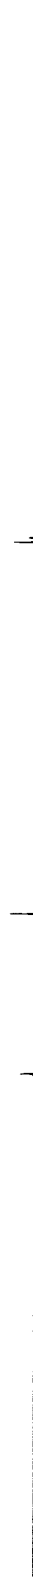

all protonated carbons

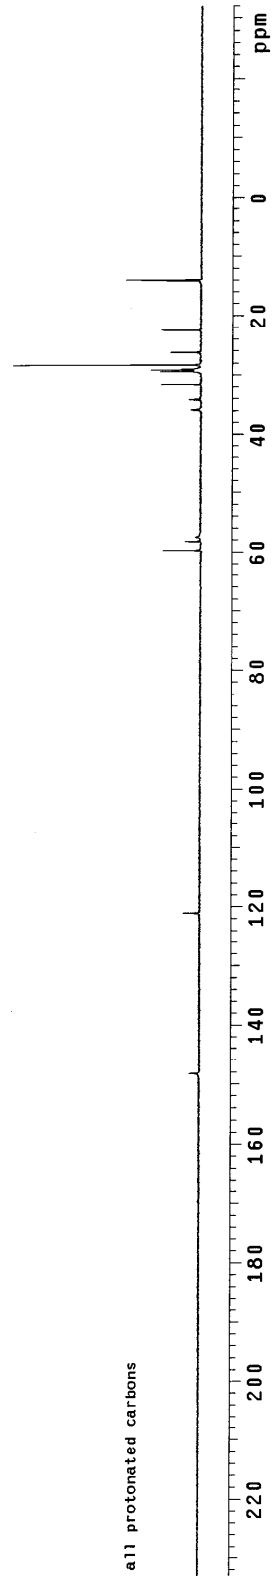



STANDARD PROTON PARAMETERS

Pulse Sequence: s2pu1

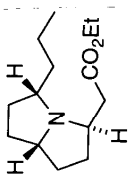

**6:** R = Et

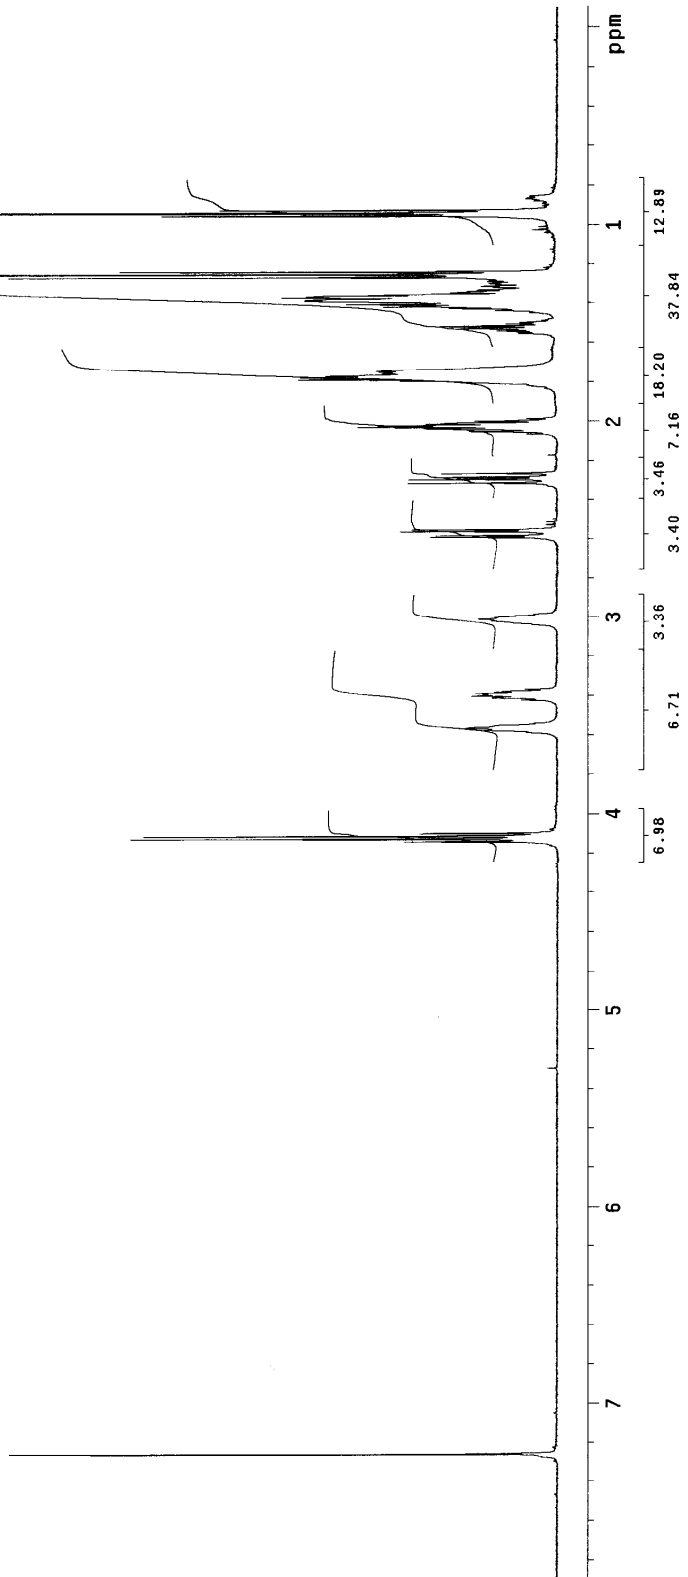

| INDEX | FREQUENCY | PPM     | HEIGHT |
|-------|-----------|---------|--------|
| 1     | 12883.050 | 172.071 | 7.8    |
| 2     | 5841.541  | 77.421  | 13.7   |
| 3     | 5809.801  | 77.000  | 12.4   |
| 4     | 5776.840  | 76.563  | 11.7   |
| 5     | 4950.373  | 65.610  | 18.0   |
| 6     | 4791.672  | 63.506  | 17.9   |
| 7     | 4529.205  | 60.028  | 13.9   |
| 8     | 4086.063  | 54.154  | 18.2   |
| 9     | 3259.596  | 43.201  | 18.1   |
| 10    | 2527.130  | 33.493  | 16.0   |
| 11    | 2441.675  | 32.361  | 13.8   |
| 12    | 2363.545  | 31.325  | 21.6   |
| 13    | 2320.818  | 30.759  | 17.8   |
| 14    | 2273.208  | 30.128  | 15.9   |
| 15    | 1613.988  | 21.391  | 21.5   |
| 16    | 1085.391  | 14.385  | 19.9   |
| 17    | 1073.184  | 14.223  | 13.0   |

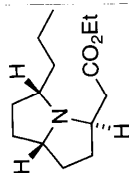

**6: R = Et**

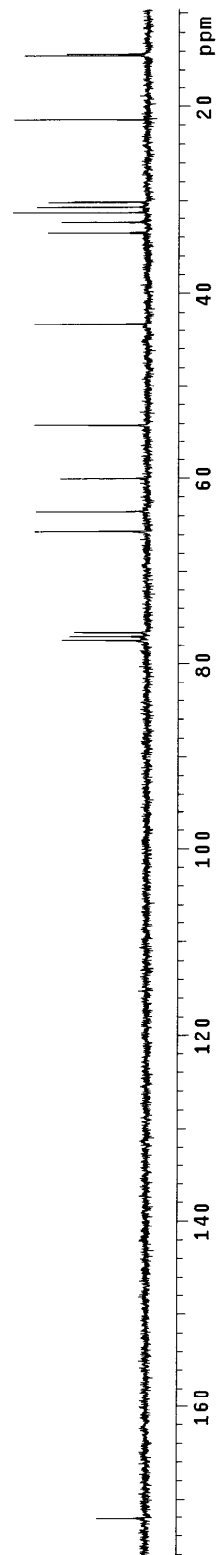

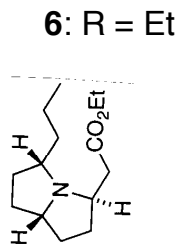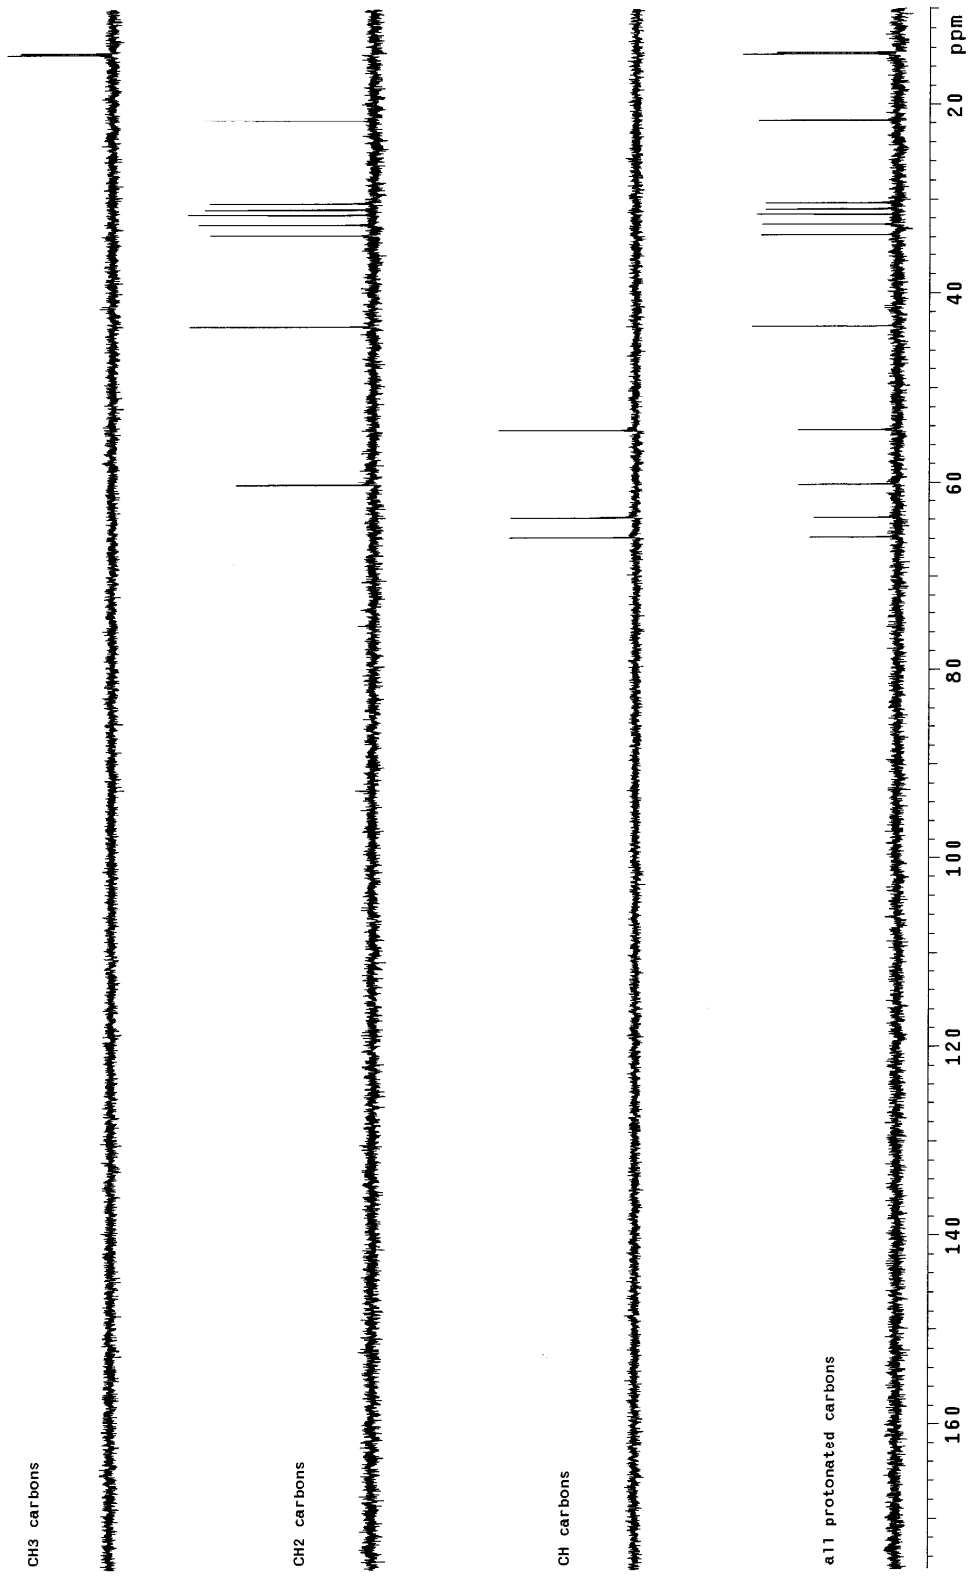



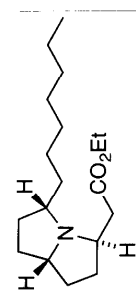

6: R = n-C<sub>6</sub>H<sub>13</sub>

| INDEX | FREQUENCY | PPM     | HEIGHT |
|-------|-----------|---------|--------|
| 1     | 12964.948 | 171.830 | 17.0   |
| 2     | 5839.269  | 77.391  | 10.9   |
| 3     | 5807.529  | 76.970  | 12.0   |
| 4     | 5775.788  | 76.549  | 11.3   |
| 5     | 4939.556  | 65.466  | 28.7   |
| 6     | 4737.945  | 63.583  | 25.3   |
| 7     | 4512.283  | 59.803  | 23.0   |
| 8     | 4072.804  | 53.975  | 24.2   |
| 9     | 3249.999  | 43.074  | 24.8   |
| 10    | 2432.078  | 32.233  | 26.2   |
| 11    | 2386.910  | 31.635  | 24.8   |
| 12    | 2353.949  | 31.196  | 29.3   |
| 13    | 2347.845  | 31.117  | 27.7   |
| 14    | 2310.001  | 30.616  | 28.3   |
| 15    | 2269.715  | 30.082  | 21.1   |
| 16    | 2240.416  | 29.693  | 29.3   |
| 17    | 2195.248  | 29.085  | 28.4   |
| 18    | 2120.780  | 28.106  | 28.1   |
| 19    | 1695.949  | 22.477  | 26.5   |
| 20    | 1062.366  | 14.080  | 25.7   |
| 21    | 1051.379  | 13.934  | 29.4   |

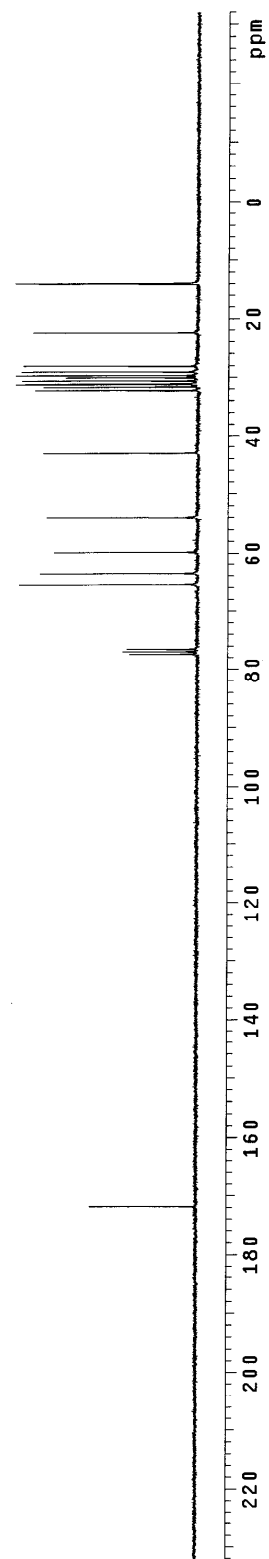

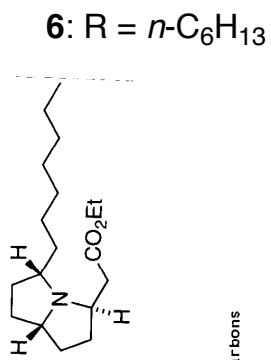

CH3 carbons

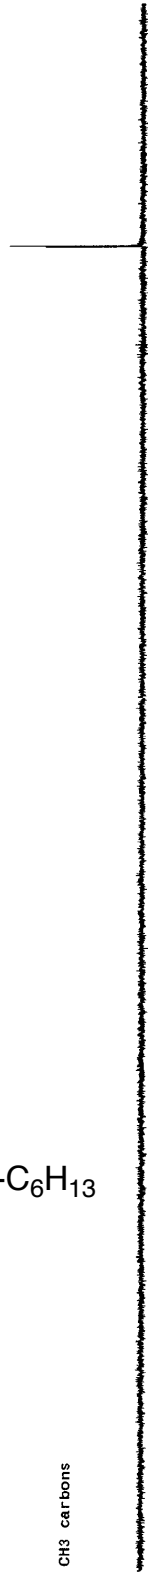

CH2 carbons

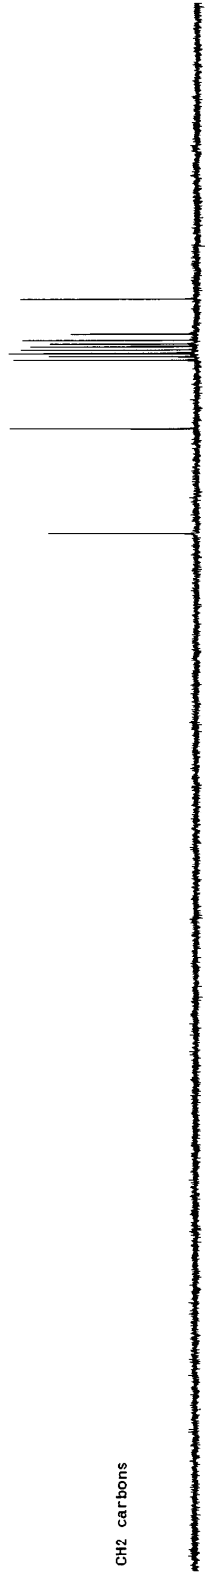

CH carbons

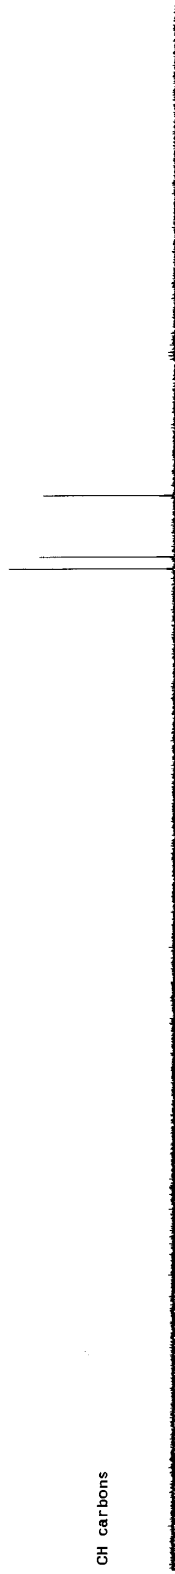

all protonated carbons

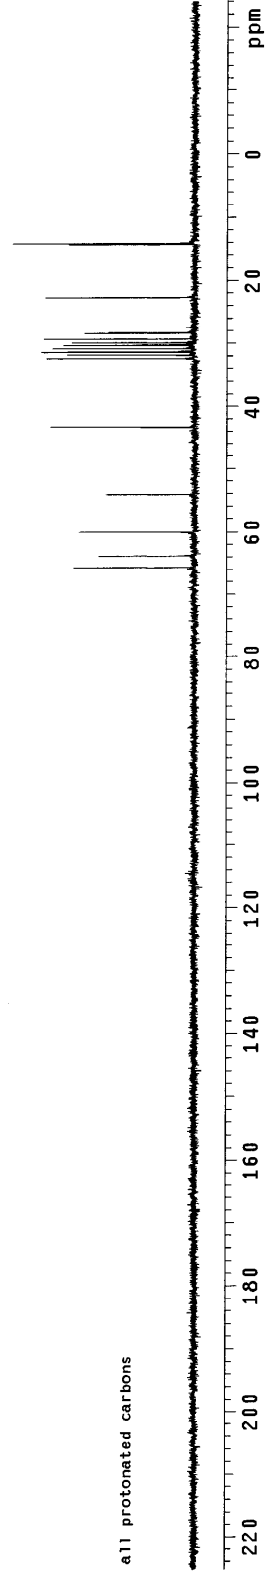

220 200 180 160 140 120 100 80 60 40 20 0 ppm

STANDARD 1H OBSERVE

Pulse Sequence: s2pu1

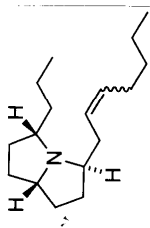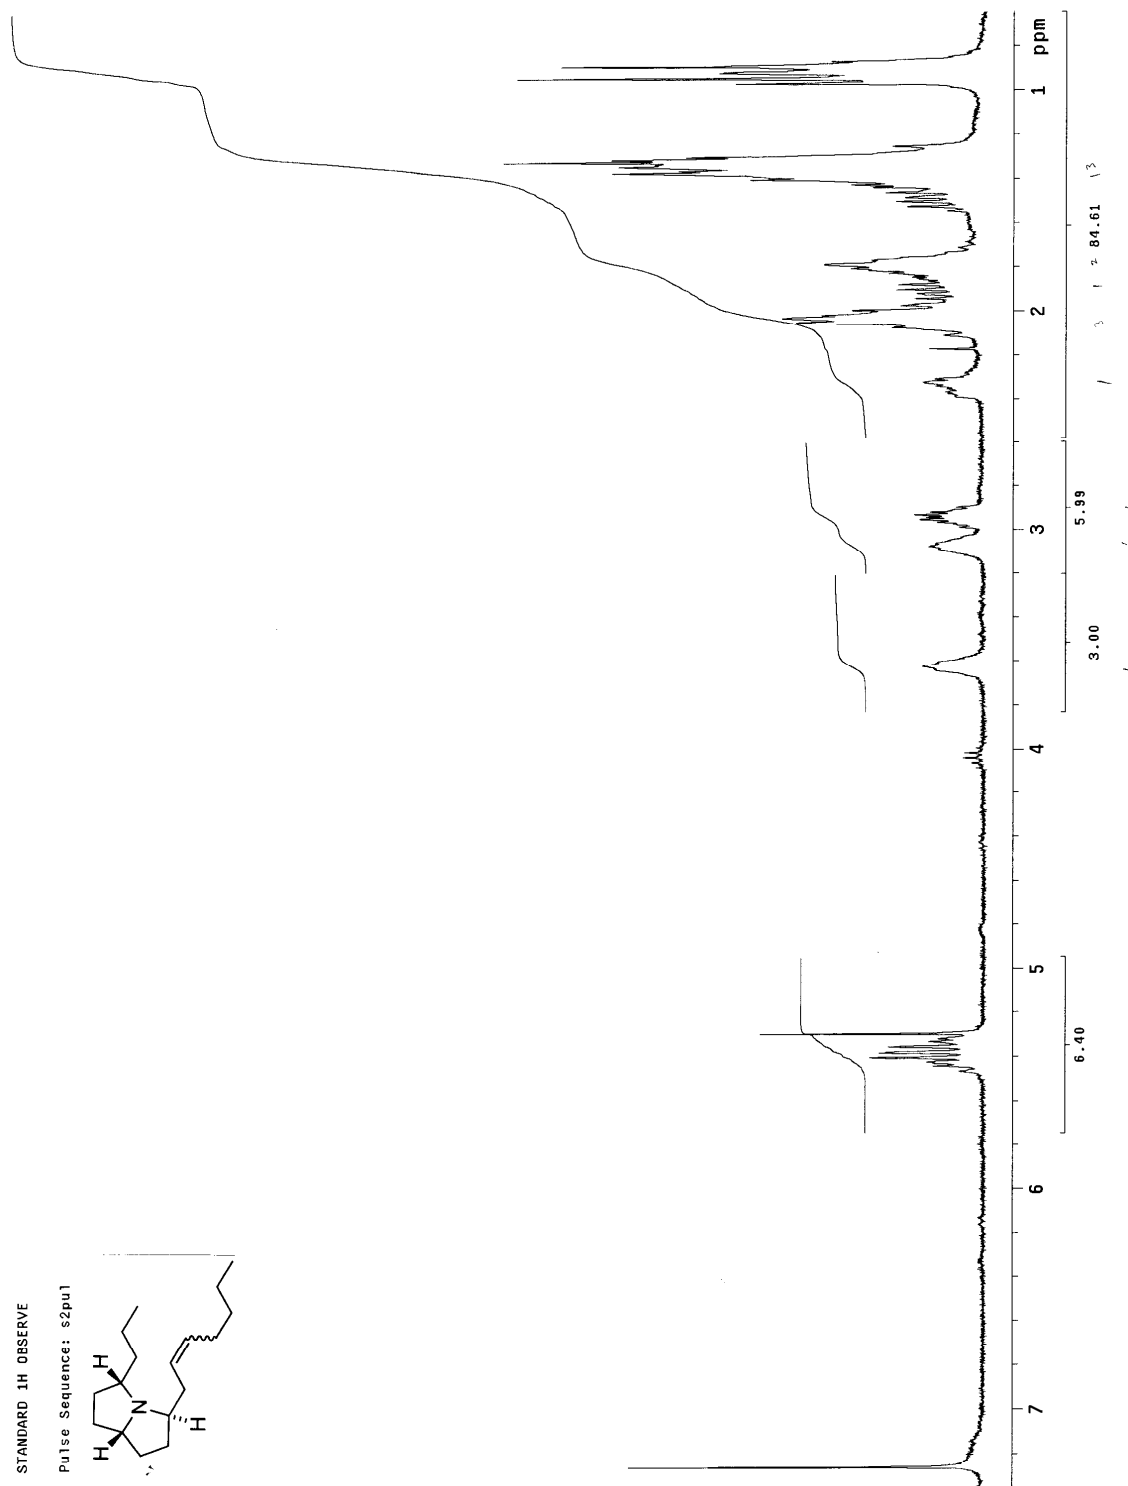

STANDARD 1H OBSERVE

Pulse Sequence: s2pu1

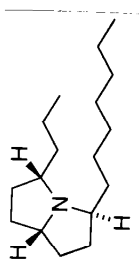**7:** R = *n*-Pr, R' = *n*-C<sub>7</sub>H<sub>15</sub>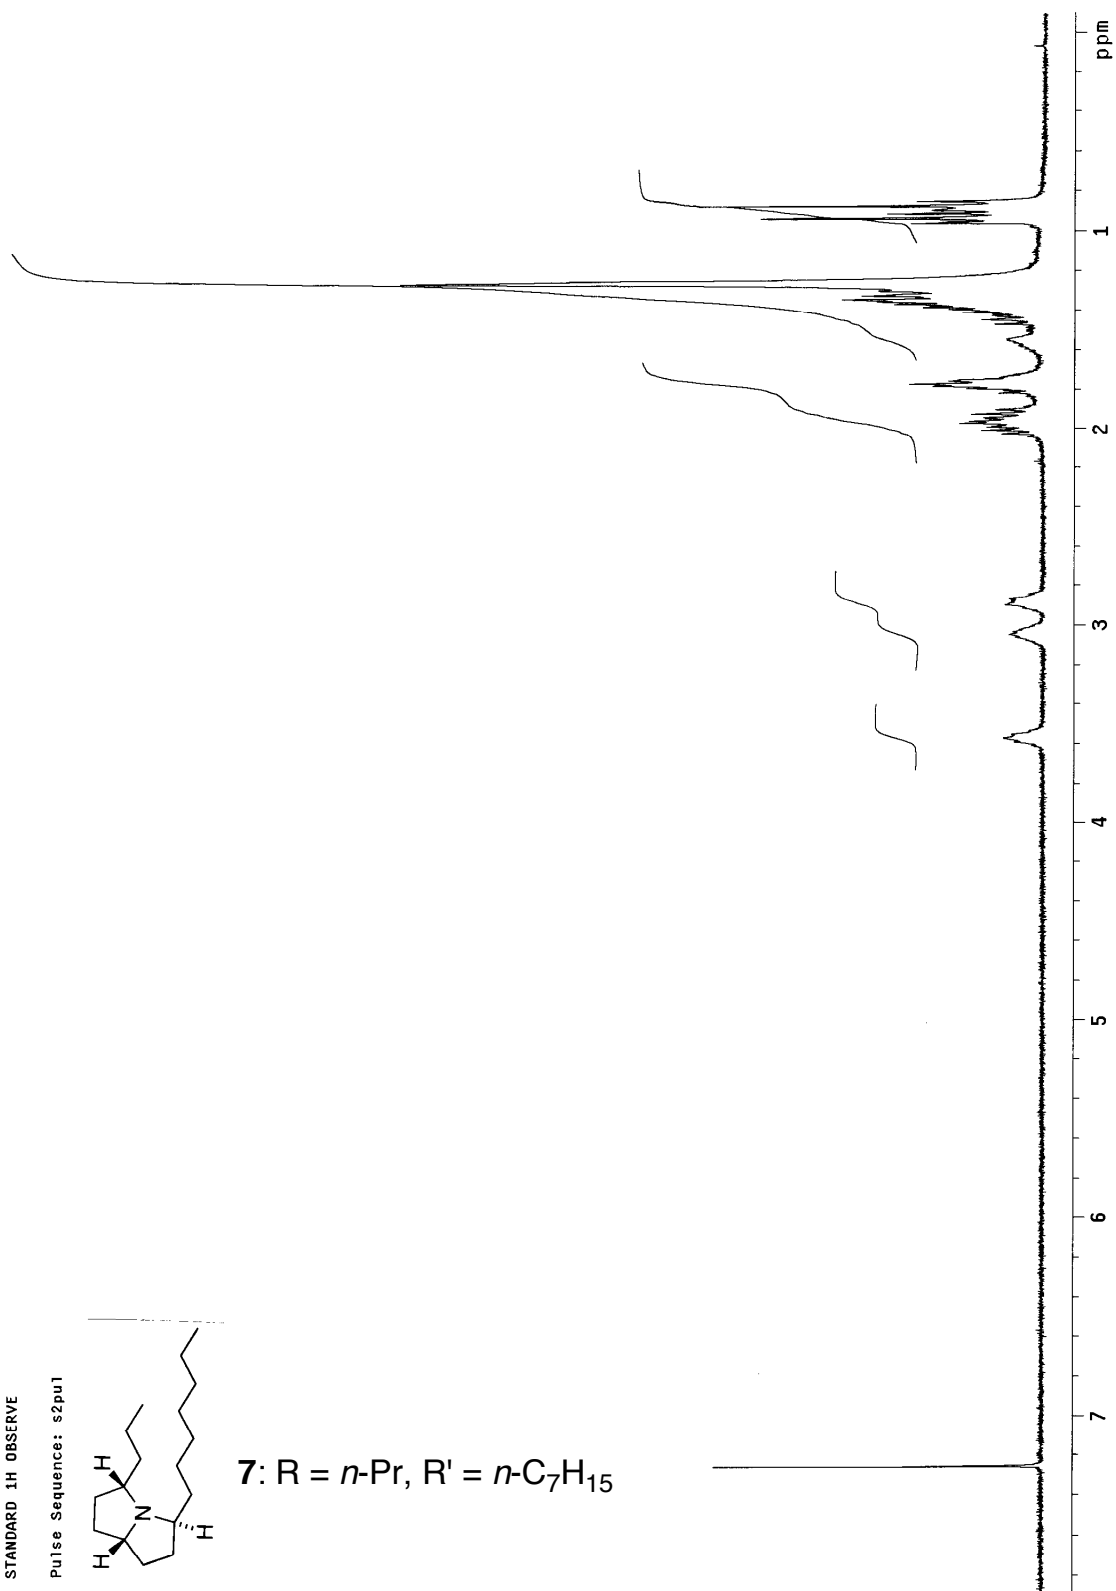



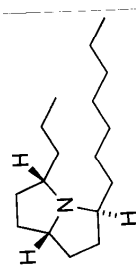

7: R = *n*-Pr, R' = *n*-C<sub>7</sub>H<sub>15</sub>

| INDEX | FREQUENCY PPM | HEIGHT              |
|-------|---------------|---------------------|
| 1     | 5841.541      | 77.421 <sup>a</sup> |
| 2     | 5809.800      | 77.000 <sup>a</sup> |
| 3     | 5778.060      | 76.579 <sup>a</sup> |
| 4     | 4867.464      | 65.836 <sup>a</sup> |
| 5     | 4811.204      | 63.765 <sup>a</sup> |
| 6     | 4354.633      | 57.714 <sup>a</sup> |
| 7     | 2915.337      | 38.638 <sup>a</sup> |
| 8     | 2546.662      | 33.752 <sup>a</sup> |
| 9     | 2422.142      | 32.102 <sup>a</sup> |
| 10    | 2409.935      | 31.940 <sup>a</sup> |
| 11    | 2382.844      | 31.713 <sup>a</sup> |
| 12    | 2333.026      | 30.921 <sup>a</sup> |
| 13    | 2278.091      | 30.193 <sup>a</sup> |
| 14    | 2256.117      | 29.901 <sup>a</sup> |
| 15    | 2220.714      | 29.432 <sup>a</sup> |
| 16    | 2053.468      | 27.216 <sup>a</sup> |
| 17    | 1717.754      | 22.766 <sup>a</sup> |
| 18    | 1627.416      | 21.568 <sup>a</sup> |
| 19    | 1097.599      | 14.547 <sup>a</sup> |
| 20    | 1071.862      | 14.207 <sup>a</sup> |

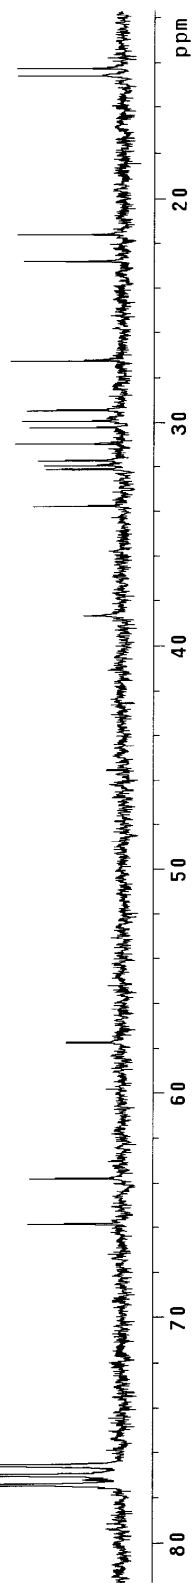

7: R = *n*-Pr,  
R' = *n*-C<sub>7</sub>H<sub>15</sub>

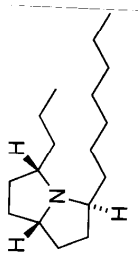

CH3 carbons

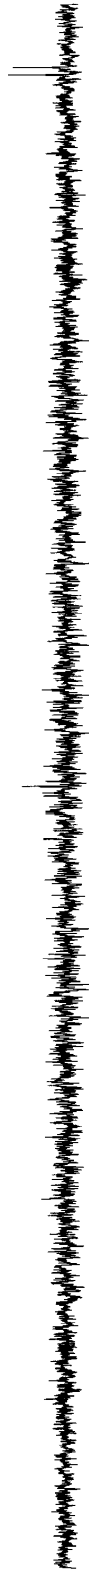

CH2 carbons

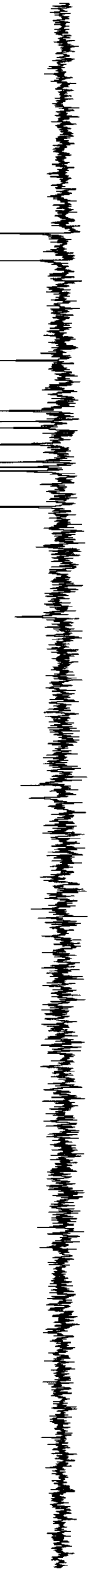

CH carbons

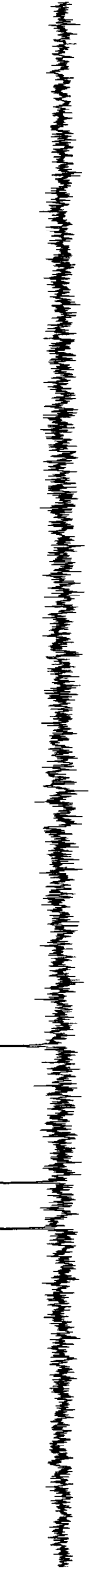

all protonated carbons

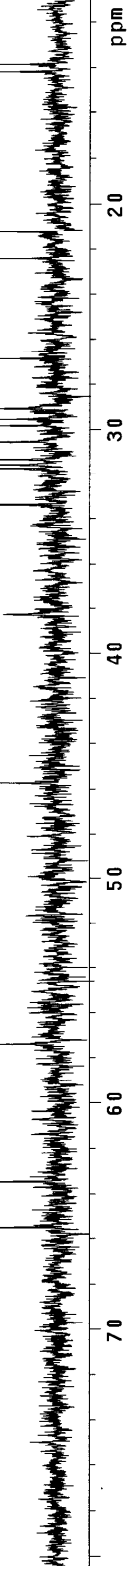

## STANDARD PROTON PARAMETERS

Pulse Sequence: s2pu1

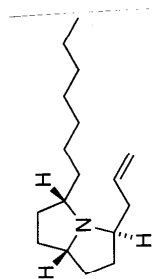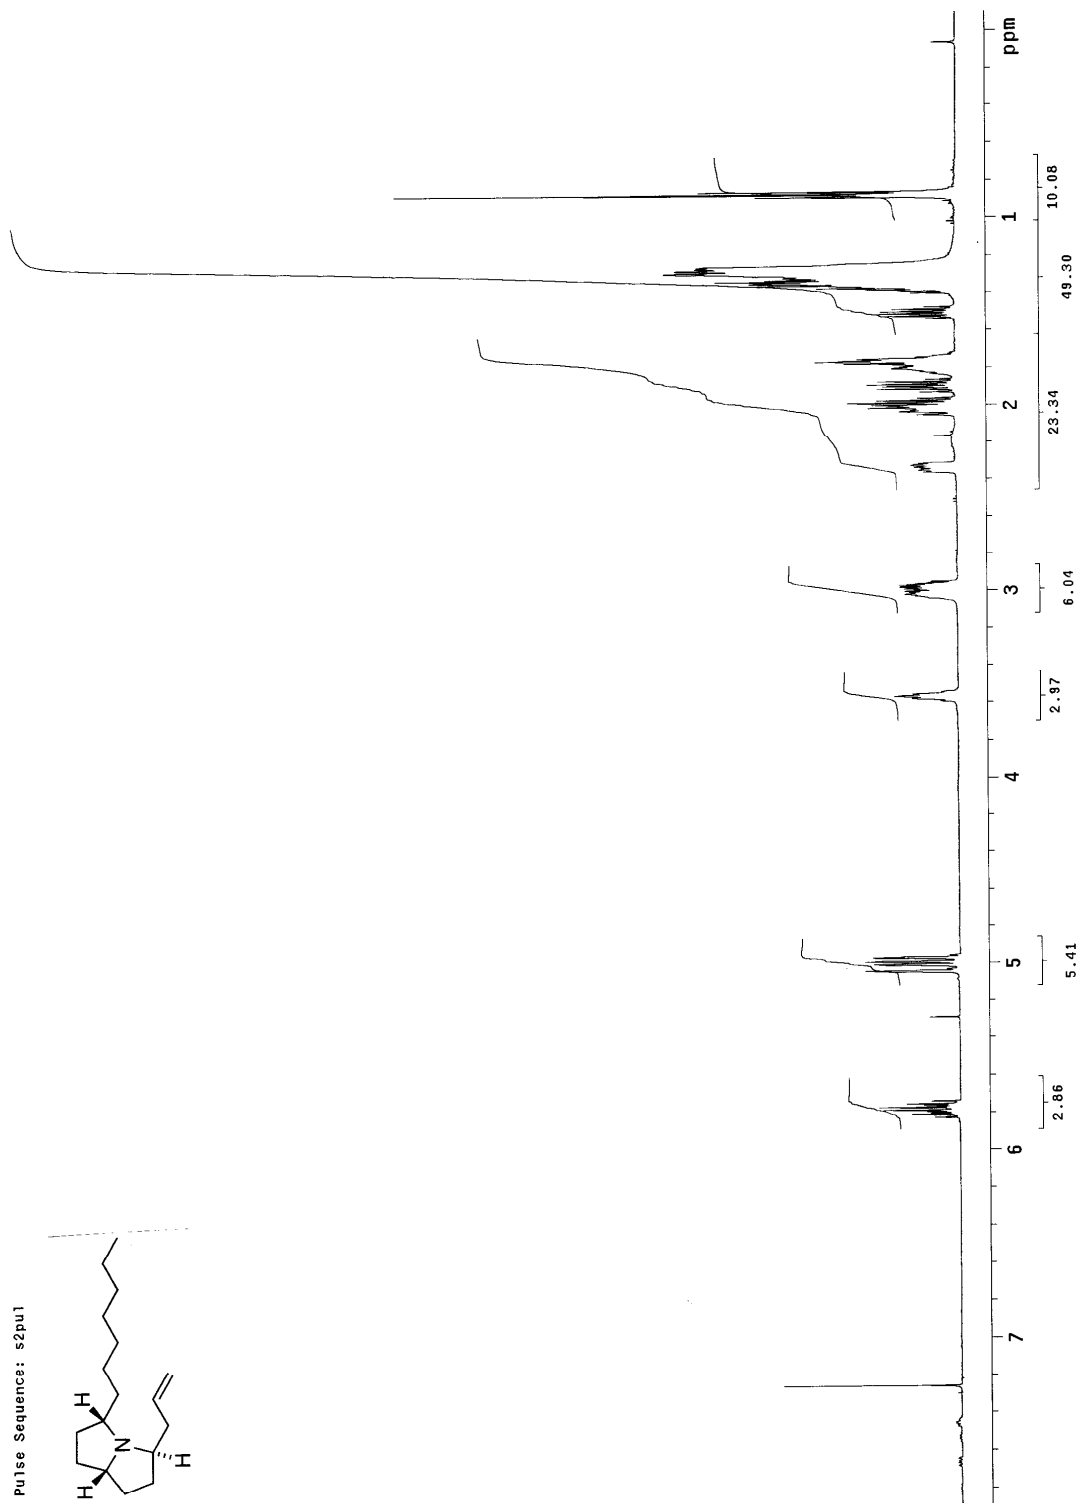

| INDEX | FREQUENCY | PPM      | HEIGHT |
|-------|-----------|----------|--------|
| 1     | 10303.483 | 136.5570 | 14.6   |
| 2     | 8737.225  | 115.7991 | 12.2   |
| 3     | 5841.541  | 77.4211  | 85.8   |
| 4     | 5809.800  | 77.0001  | 85.2   |
| 5     | 5778.060  | 76.5791  | 80.8   |
| 6     | 4977.230  | 65.9661  | 16.9   |
| 7     | 4831.858  | 64.0401  | 18.8   |
| 8     | 4310.866  | 57.1320  | 17.6   |
| 9     | 3247.388  | 43.0391  | 14.6   |
| 10    | 2407.493  | 31.9081  | 18.8   |
| 11    | 2381.857  | 31.5681  | 22.1   |
| 12    | 2379.415  | 31.5361  | 20.4   |
| 13    | 2370.870  | 31.4221  | 15.3   |
| 14    | 2336.688  | 30.9691  | 19.9   |
| 15    | 2279.312  | 30.2091  | 17.6   |
| 16    | 2262.221  | 29.9821  | 16.0   |
| 17    | 2214.610  | 29.3511  | 19.7   |
| 18    | 2145.026  | 28.4291  | 14.4   |
| 19    | 1716.533  | 22.7501  | 21.2   |
| 20    | 1071.862  | 14.2071  | 16.8   |

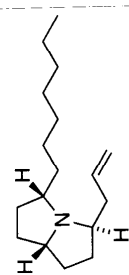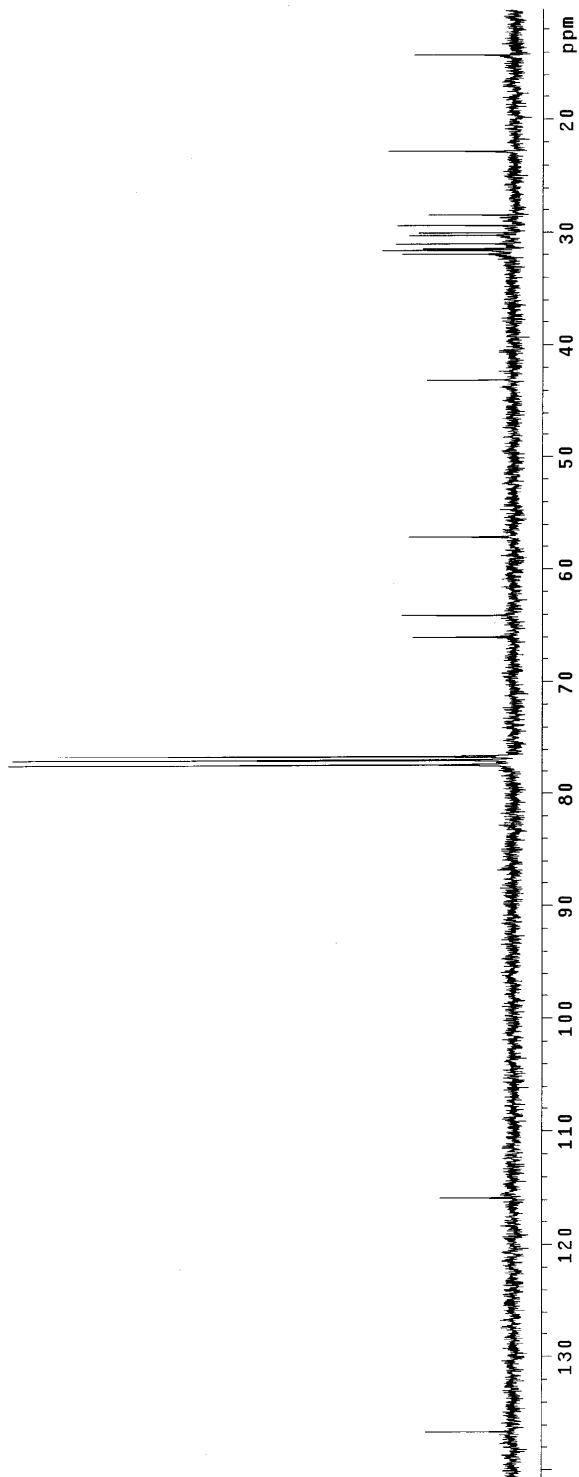

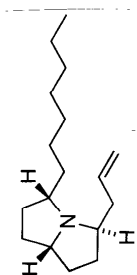CH<sub>3</sub> carbons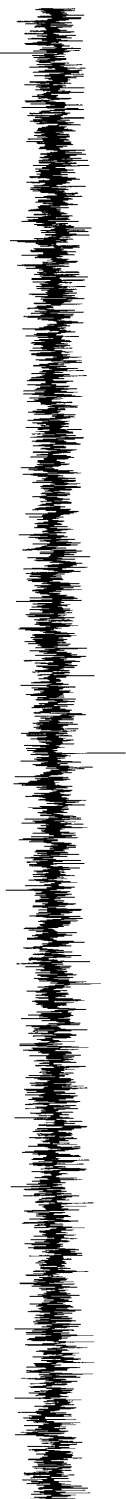CH<sub>2</sub> carbons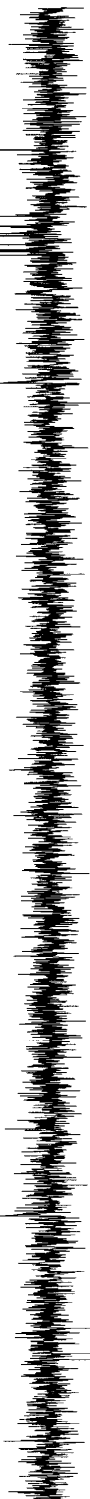

CH carbons

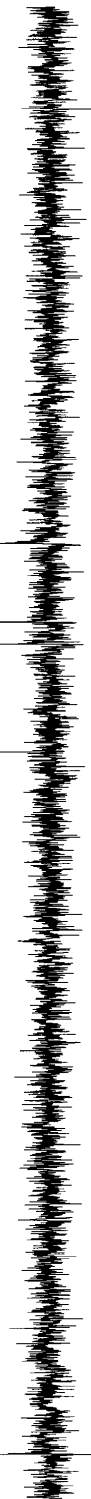

all protonated carbons

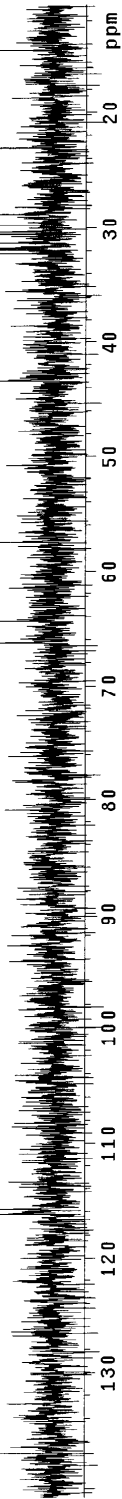

STANDARD 1H OBSERVE

Pulse Sequence: s2pu1

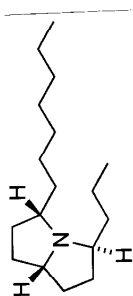**7:** R =  $n\text{-C}_7\text{H}_{15}$ , R' =  $n\text{-Pr}$ 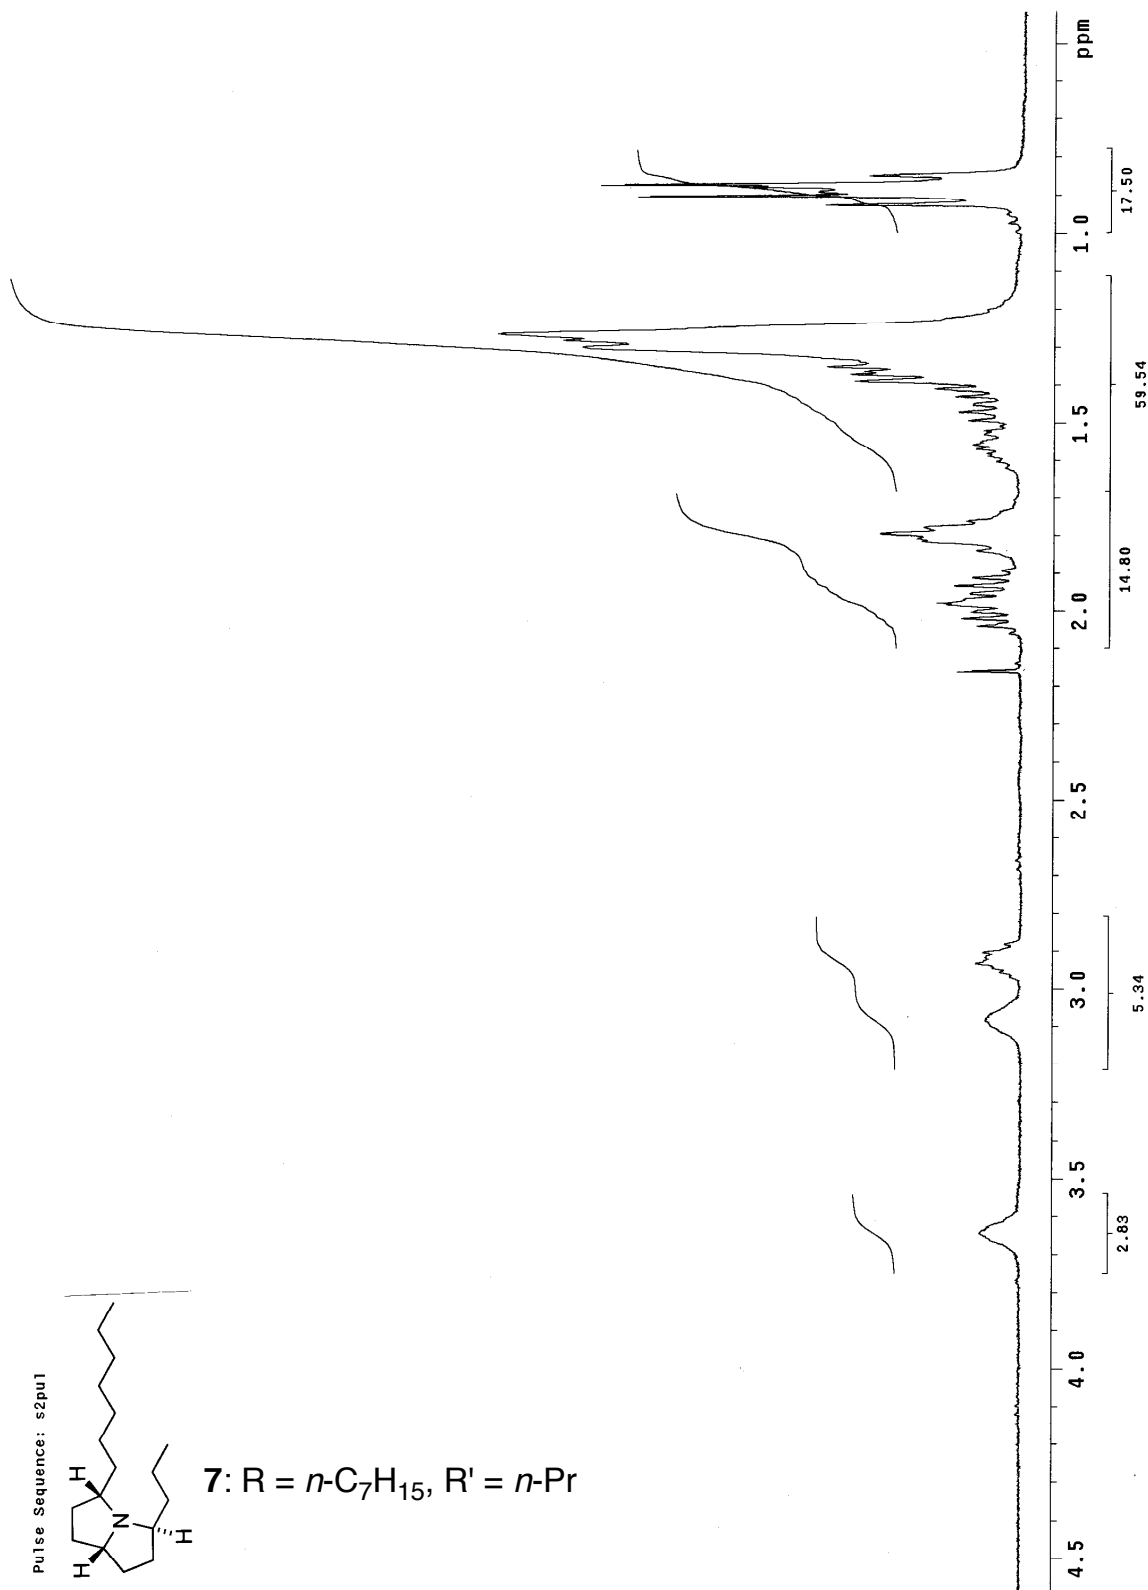

| INDEX | FREQUENCY | PPM    | HEIGHT |
|-------|-----------|--------|--------|
| 1     | 5841.541  | 77.421 | 94.8   |
| 2     | 5809.800  | 77.000 | 95.0   |
| 3     | 5778.060  | 76.579 | 88.6   |
| 4     | 4878.451  | 65.982 | 13.5   |
| 5     | 4831.958  | 64.040 | 23.9   |
| 6     | 4360.737  | 57.785 | 7.1    |
| 7     | 3047.181  | 40.386 | 4.5    |
| 8     | 2423.363  | 32.118 | 26.1   |
| 9     | 2405.052  | 31.875 | 27.7   |
| 10    | 2390.402  | 31.661 | 21.8   |
| 11    | 2359.883  | 31.277 | 13.4   |
| 12    | 2318.376  | 30.727 | 18.7   |
| 13    | 2274.428  | 30.144 | 17.2   |
| 14    | 2259.779  | 29.950 | 26.5   |
| 15    | 2212.169  | 29.319 | 17.4   |
| 16    | 2136.481  | 28.316 | 15.8   |
| 17    | 1715.312  | 22.734 | 21.8   |
| 18    | 1538.300  | 20.388 | 18.7   |
| 19    | 1086.612  | 14.401 | 17.7   |
| 20    | 1070.742  | 14.191 | 25.5   |

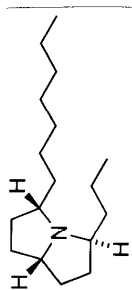

7: R =  $n\text{-C}_7\text{H}_{15}$ , R' =  $n\text{-Pr}$

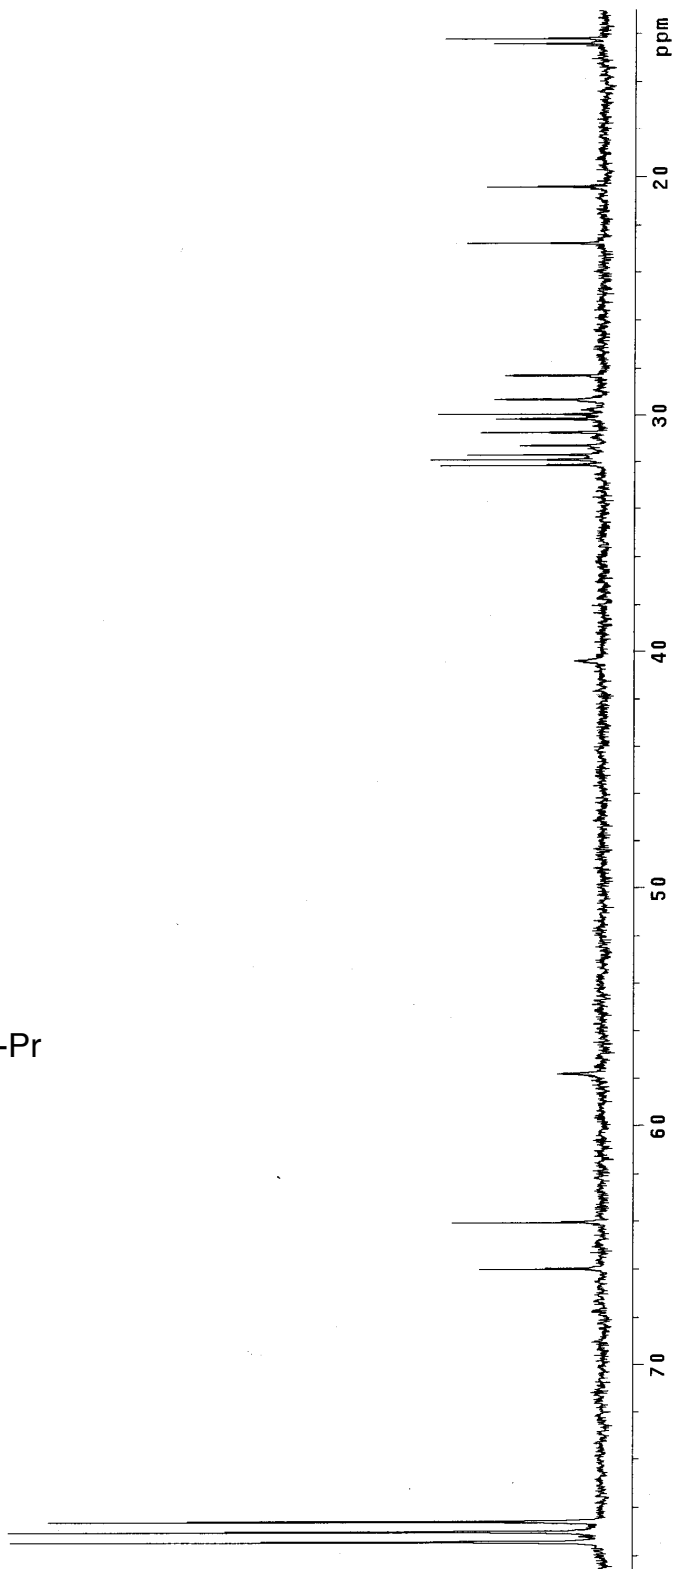

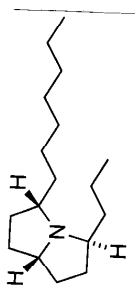

7: R =  $n\text{-C}_7\text{H}_{15}$ ,  
 R' =  $n\text{-Pr}$

CH3 carbons

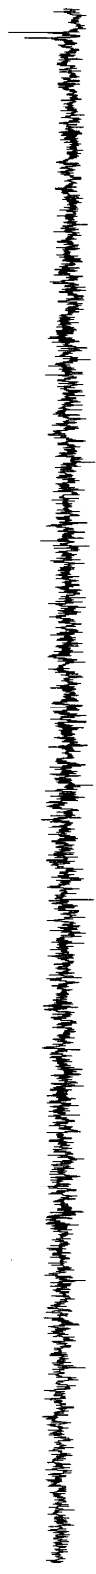

CH2 carbons

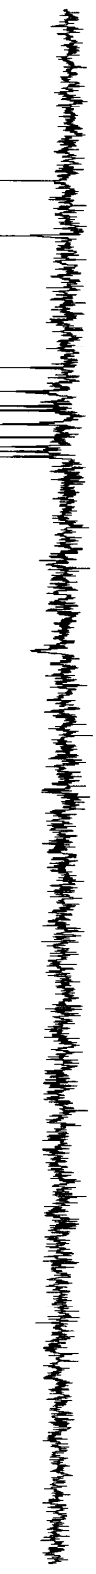

CH carbons

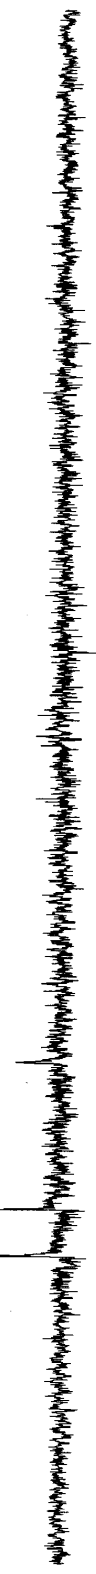

all protonated carbons

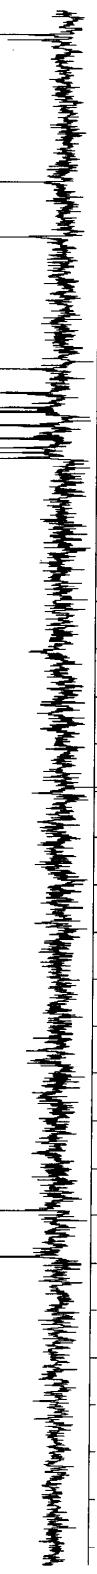

ppm



STANDARD PROTON PARAMETERS

Pulse Sequence: s2pu1

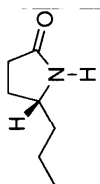**8: R = *n*-Pr**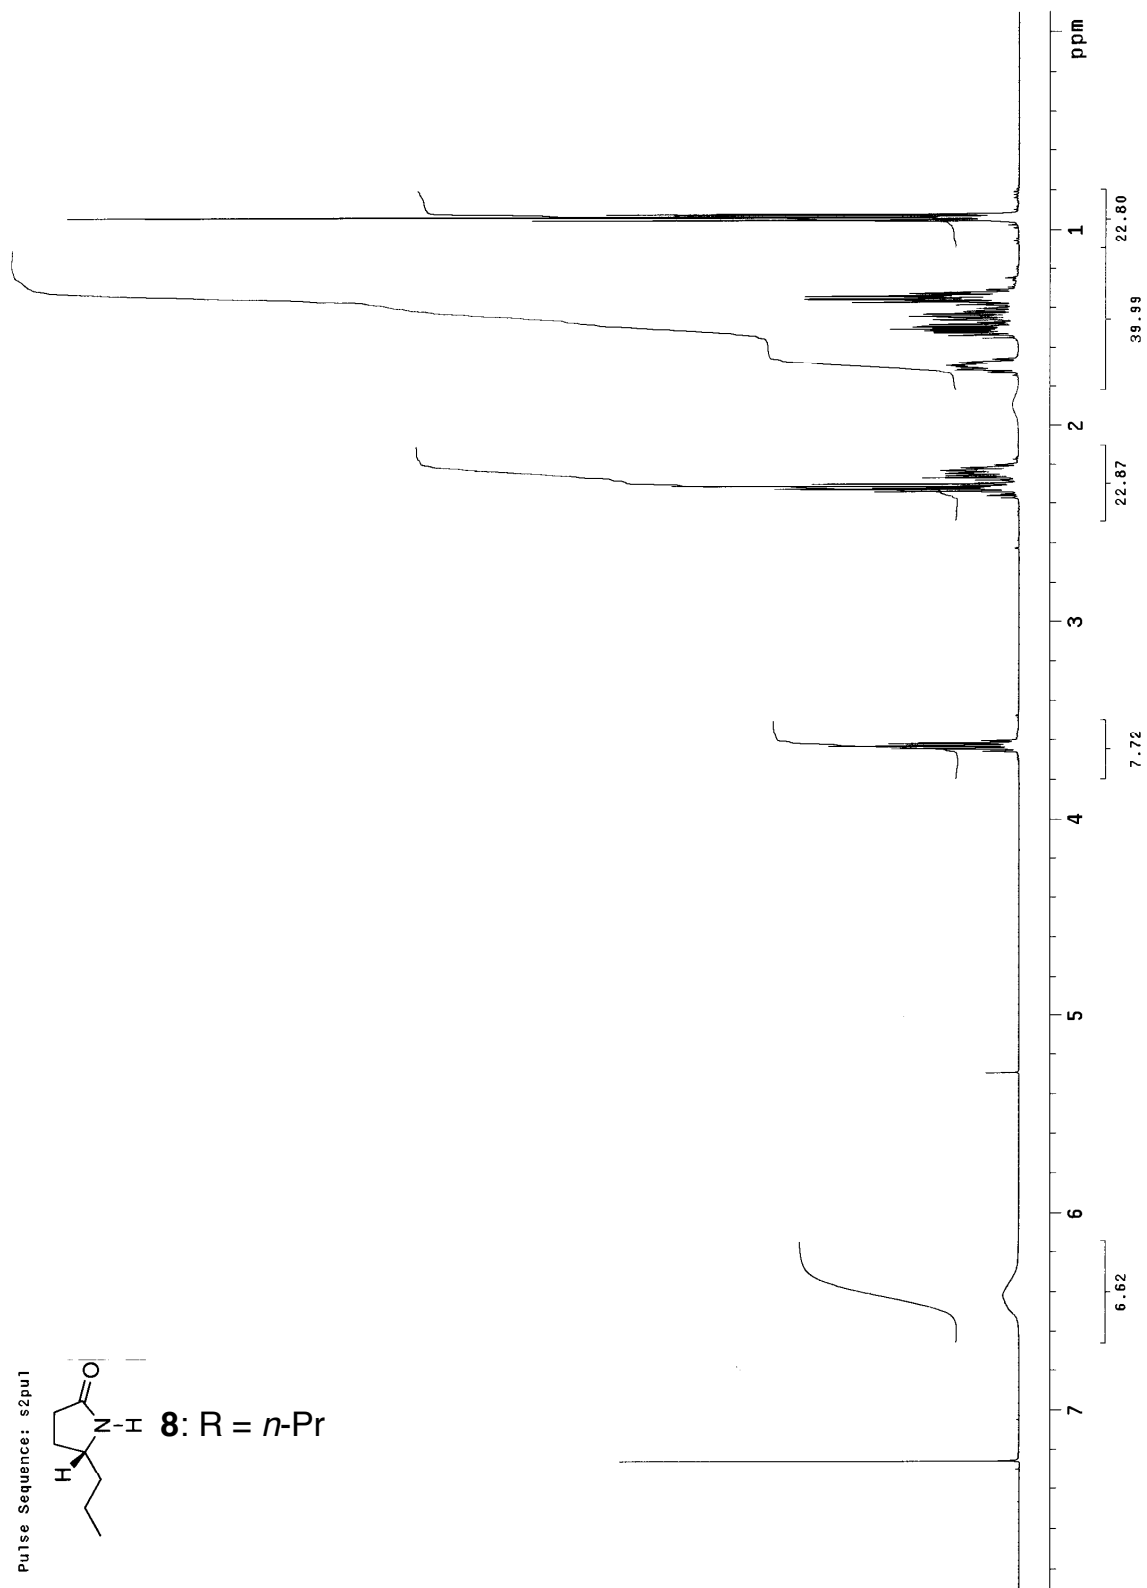

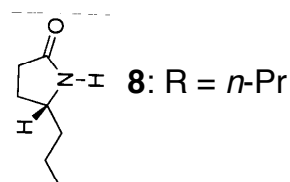

| INDEX | FREQUENCY | PPM     | HEIGHT |
|-------|-----------|---------|--------|
| 1     | 13451.870 | 178.284 | 31.4   |
| 2     | 5841.543  | 77.421  | 8.7    |
| 3     | 5809.802  | 77.000  | 9.0    |
| 4     | 5776.841  | 76.563  | 9.0    |
| 5     | 4095.831  | 54.284  | 66.5   |
| 6     | 2911.676  | 38.590  | 69.7   |
| 7     | 2275.651  | 30.160  | 49.9   |
| 8     | 2020.509  | 26.779  | 51.4   |
| 9     | 1413.782  | 18.738  | 54.9   |
| 10    | 1028.016  | 13.625  | 56.3   |

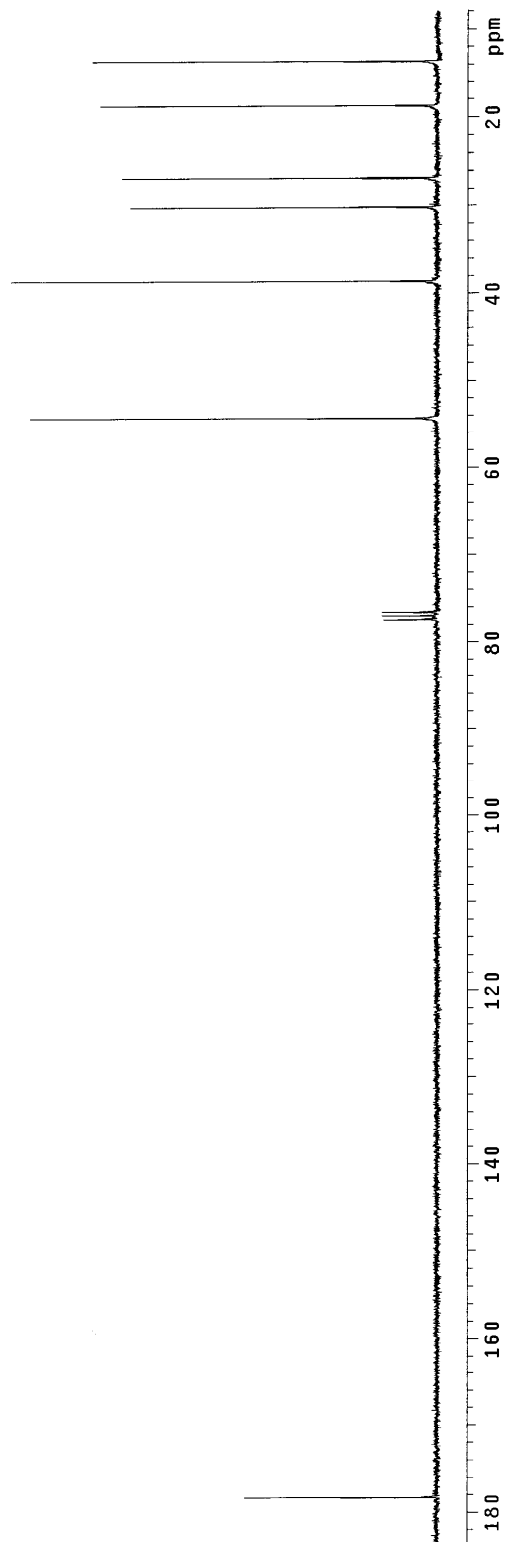

8: R = *n*-Pr

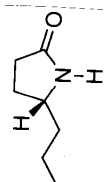

CH<sub>3</sub> carbons

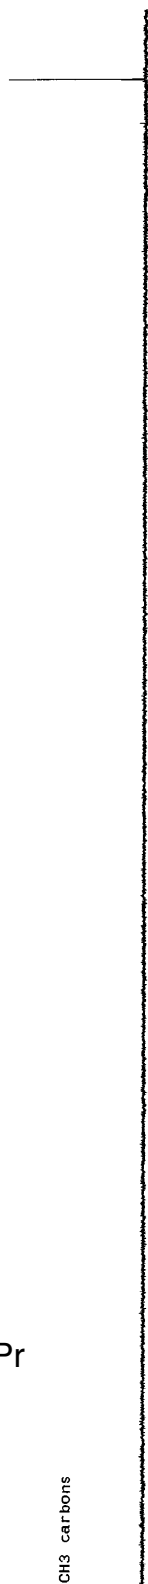

CH<sub>2</sub> carbons

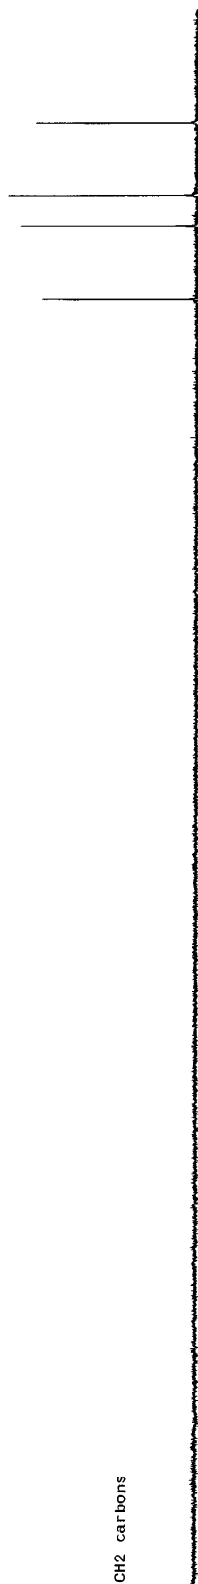

CH carbons

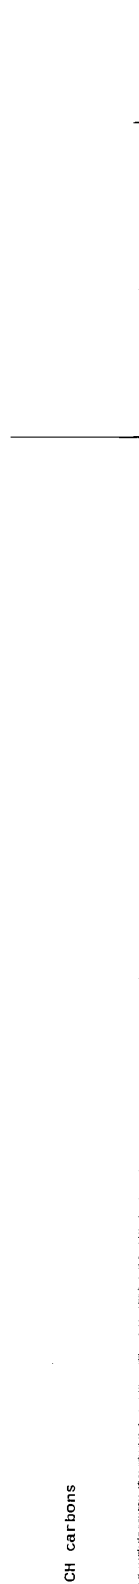

all protonated carbons

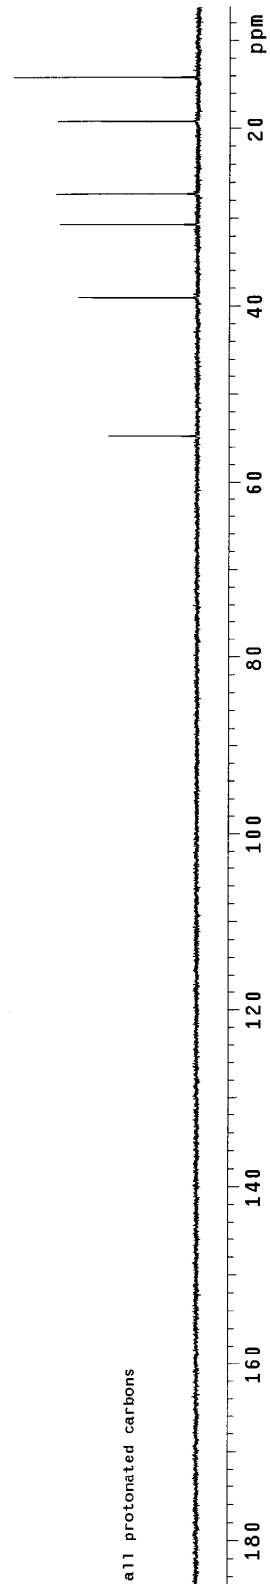

180 160 140 120 100 80 60 40 20 ppm

STANDARD PROTON PARAMETERS

Pulse Sequence: s2pu1

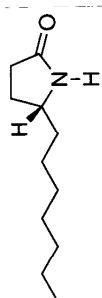**8:** R = *n*-C<sub>7</sub>H<sub>15</sub>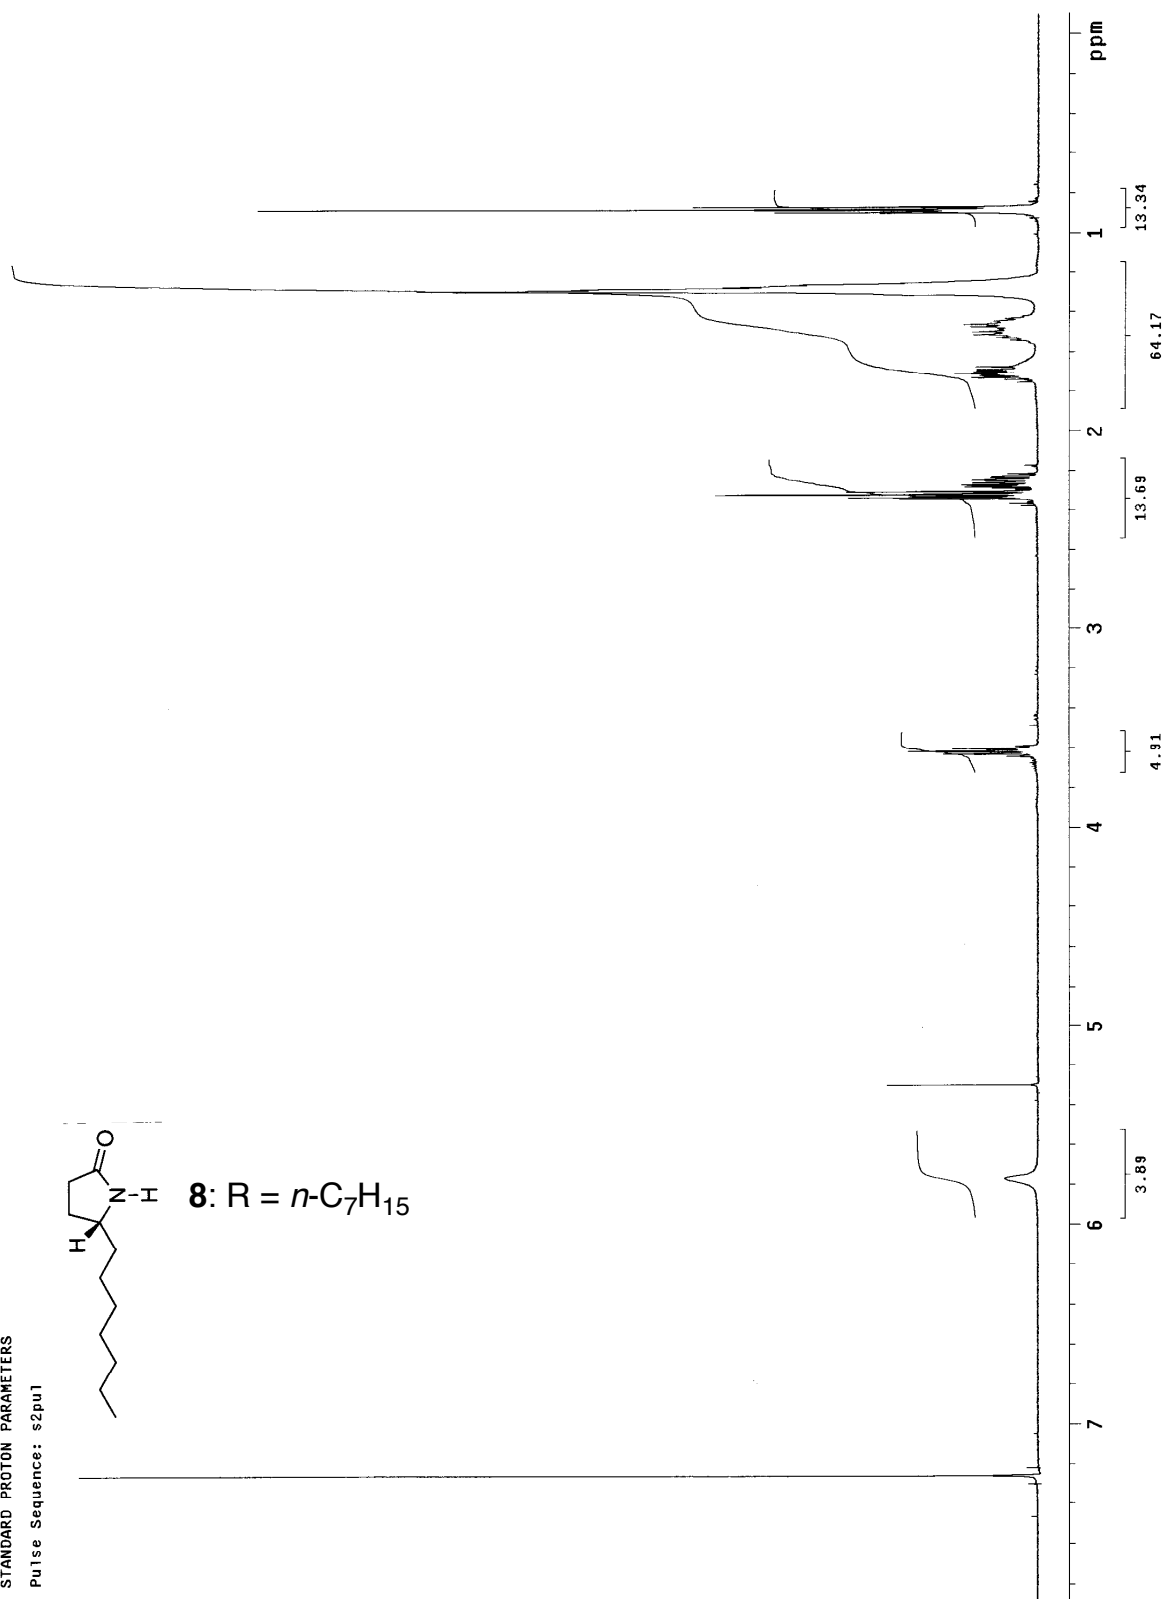

| INDEX | FREQUENCY | PPM                  | HEIGHT |
|-------|-----------|----------------------|--------|
| 1     | 13454.311 | 176.316 <sup>S</sup> | 29.4   |
| 2     | 5841.542  | 77.421 <sup>L</sup>  | 9.5    |
| 3     | 5809.802  | 77.000 <sup>L</sup>  | 10.0   |
| 4     | 5778.061  | 76.578 <sup>L</sup>  | 8.4    |
| 5     | 4121.466  | 54.624 <sup>L</sup>  | 30.6   |
| 6     | 2754.195  | 36.503 <sup>L</sup>  | 33.7   |
| 7     | 2378.186  | 31.518 <sup>L</sup>  | 39.8   |
| 8     | 2285.417  | 30.290 <sup>L</sup>  | 35.6   |
| 9     | 2206.066  | 29.238 <sup>L</sup>  | 41.6   |
| 10    | 2178.209  | 28.882 <sup>L</sup>  | 39.0   |
| 11    | 2032.716  | 26.941 <sup>L</sup>  | 35.5   |
| 12    | 1824.066  | 25.501 <sup>L</sup>  | 37.0   |
| 13    | 1686.456  | 22.378 <sup>L</sup>  | 41.5   |
| 14    | 1043.886  | 13.835 <sup>L</sup>  | 33.6   |

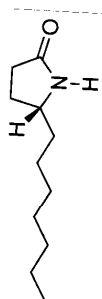

8: R = *n*-C<sub>7</sub>H<sub>15</sub>

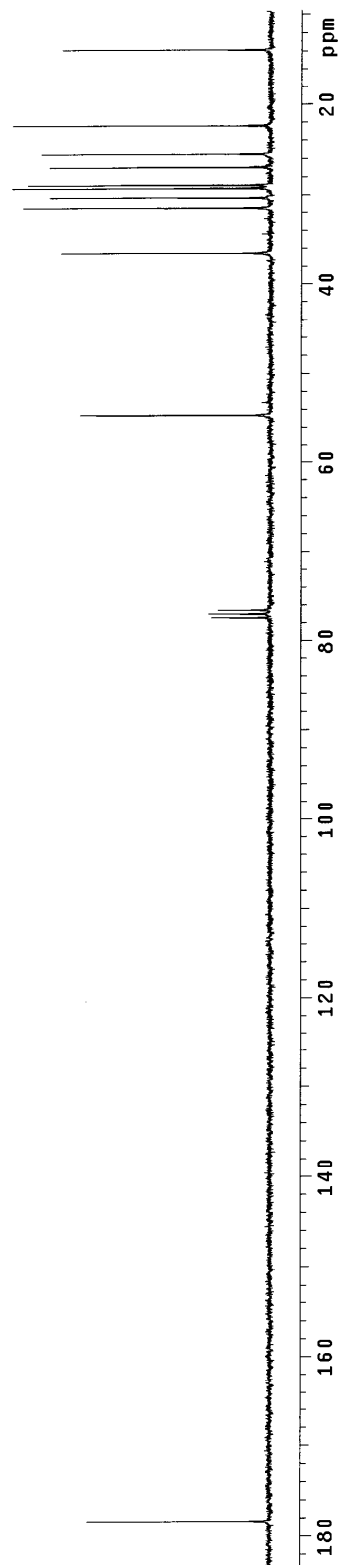

8: R =  $n\text{-C}_7\text{H}_{15}$

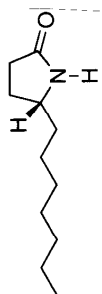

CH3 carbons

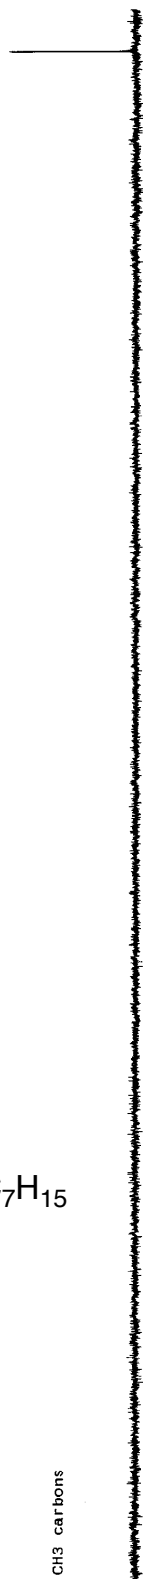

CH2 carbons

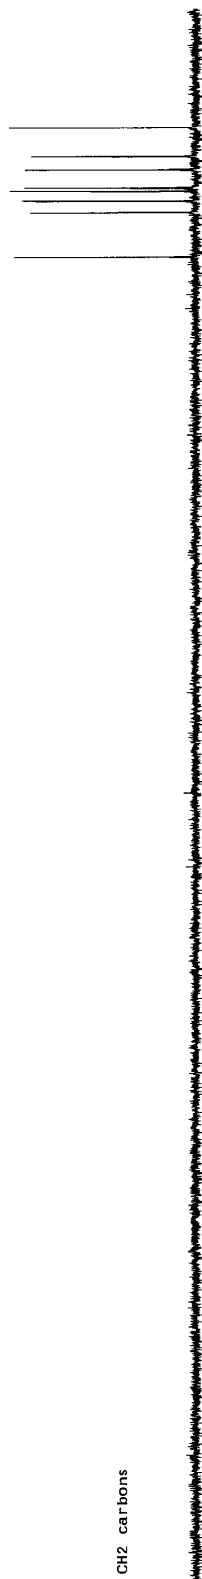

CH carbons

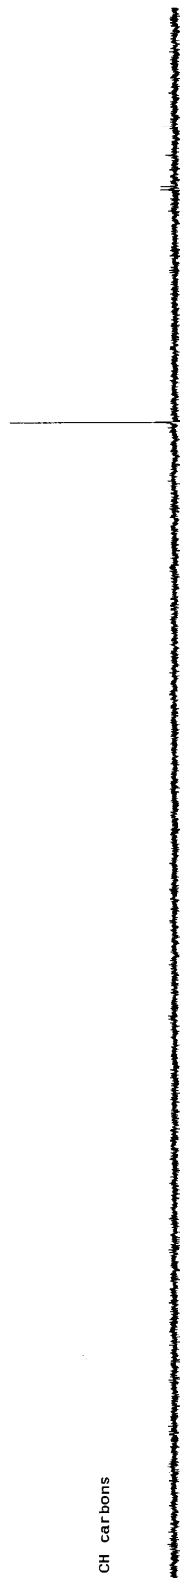

all protonated carbons

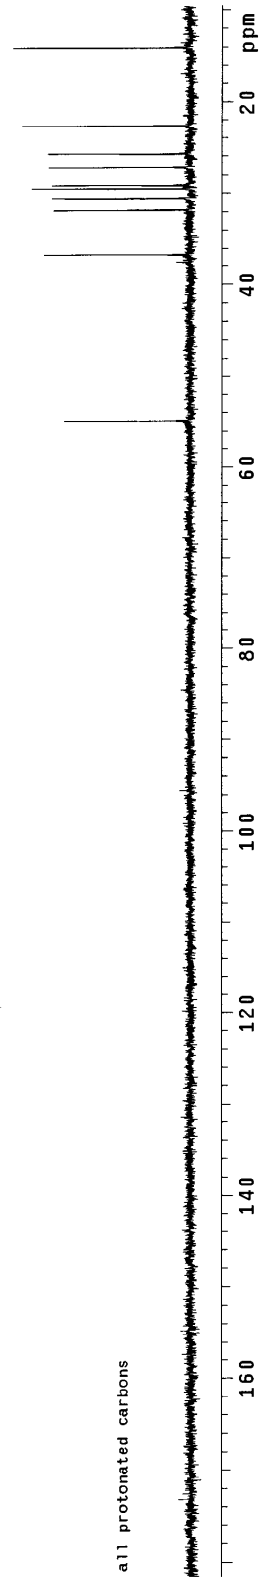

## STANDARD PROTON PARAMETERS

Pulse Sequence: s2pu1

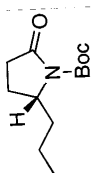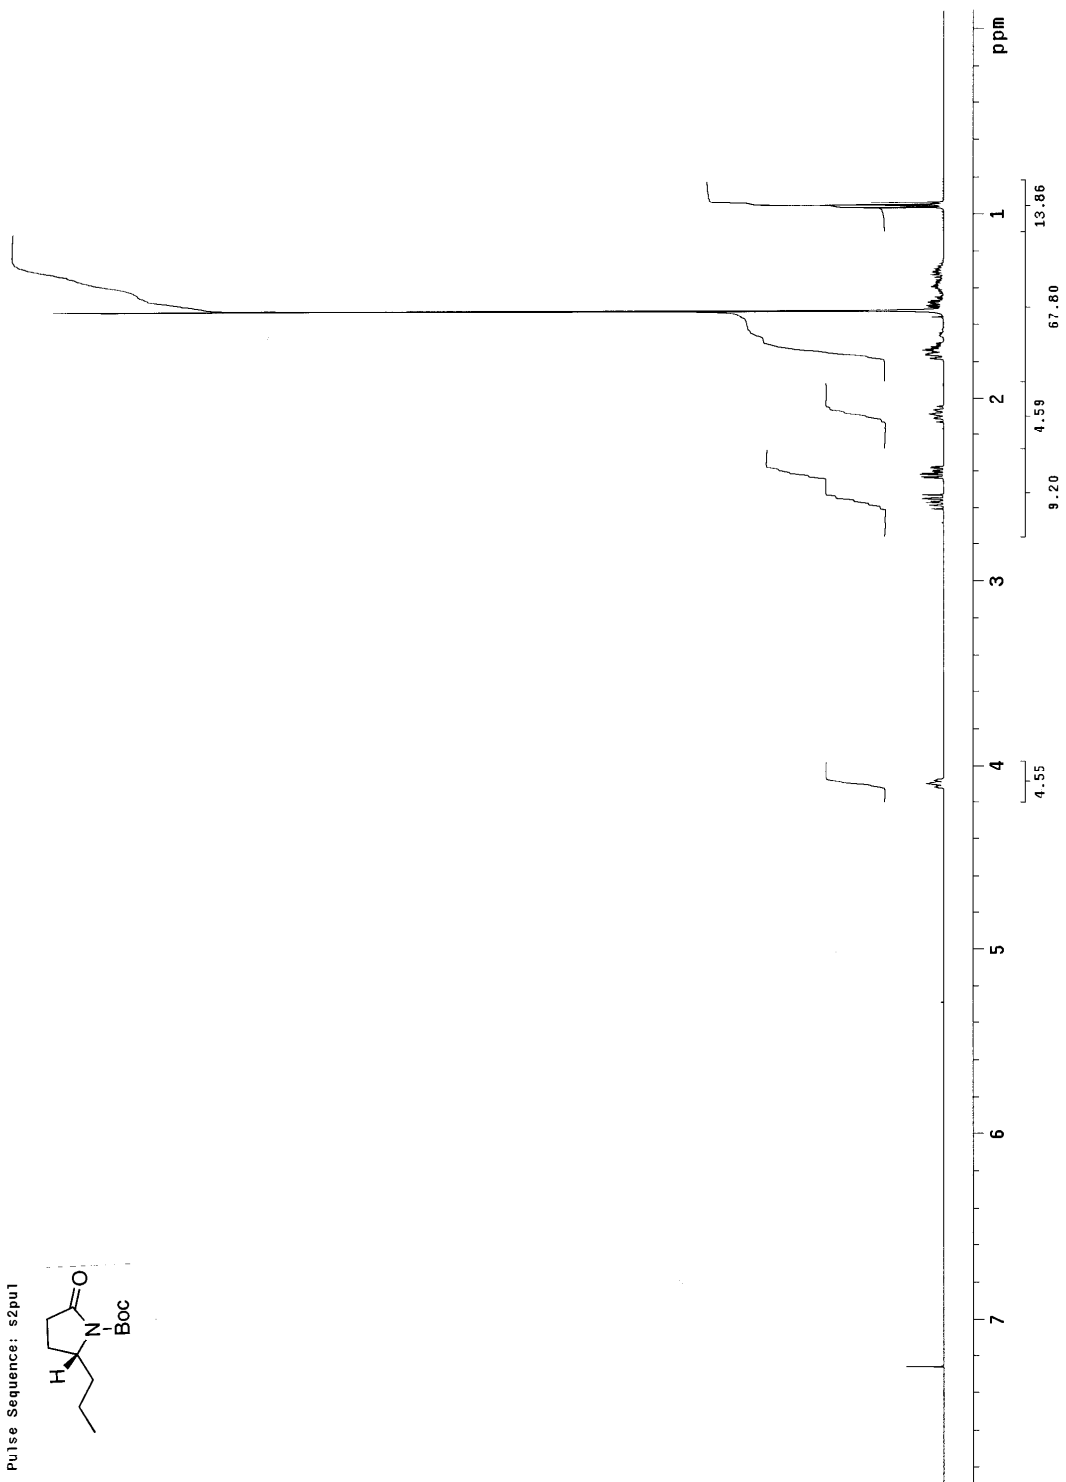

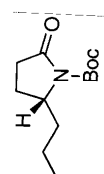

| INDEX | FREQUENCY | PPM     | HEIGHT |
|-------|-----------|---------|--------|
| 1     | 13113.715 | 173.802 | 10.8   |
| 2     | 11266.678 | 149.323 | 7.2    |
| 3     | 6188.243  | 82.016  | 11.7   |
| 4     | 5841.542  | 77.421  | 6.8    |
| 5     | 5809.802  | 77.000  | 6.7    |
| 6     | 5776.841  | 76.563  | 6.7    |
| 7     | 4328.988  | 57.374  | 23.4   |
| 8     | 2669.362  | 35.366  | 25.2   |
| 9     | 2337.911  | 30.365  | 23.2   |
| 10    | 2085.210  | 27.636  | 71.8   |
| 11    | 1667.704  | 22.103  | 24.7   |
| 12    | 1395.470  | 18.495  | 24.0   |
| 13    | 1024.354  | 13.576  | 24.1   |

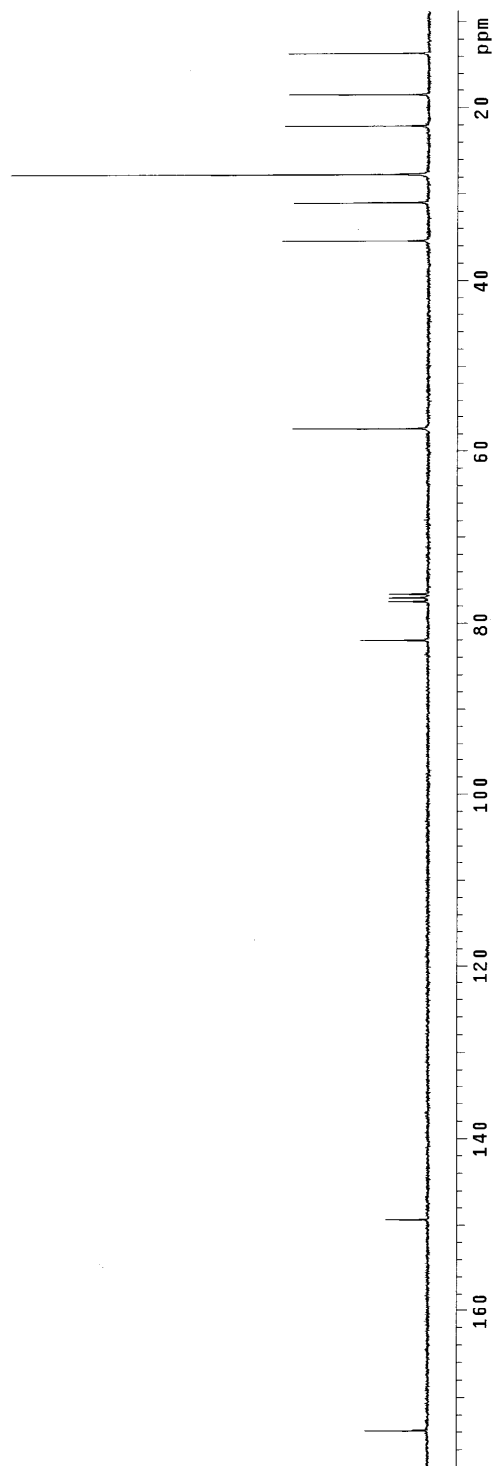



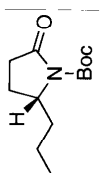

CH3 carbons

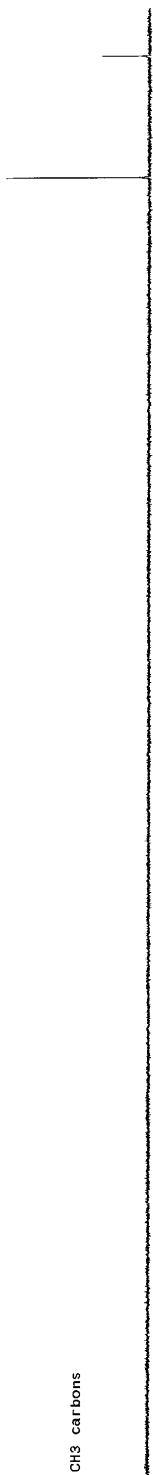

CH2 carbons

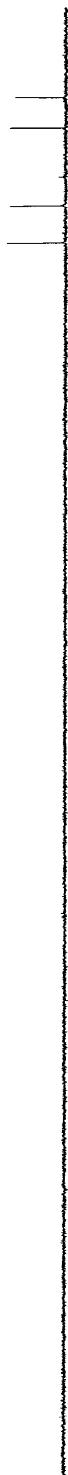

CH carbons

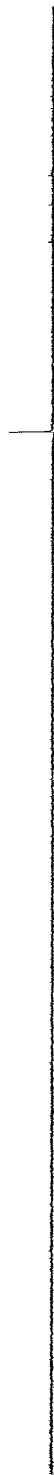

all protonated carbons

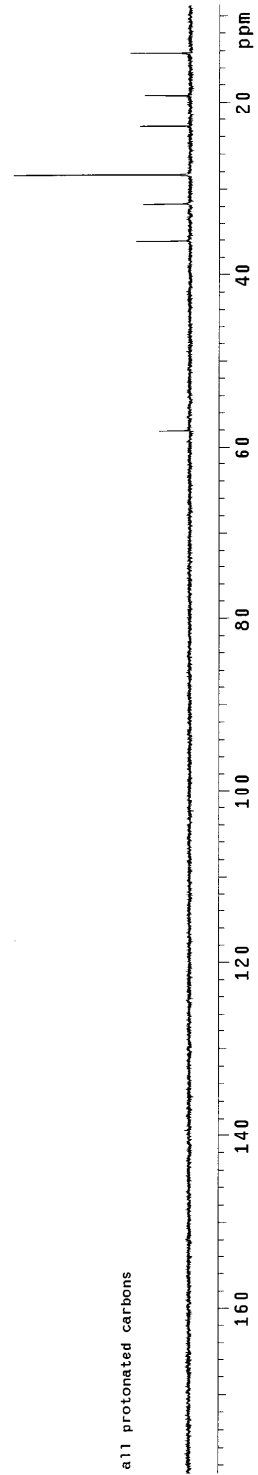

## STANDARD PROTON PARAMETERS

Pulse Sequence: szpu1

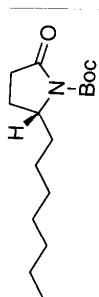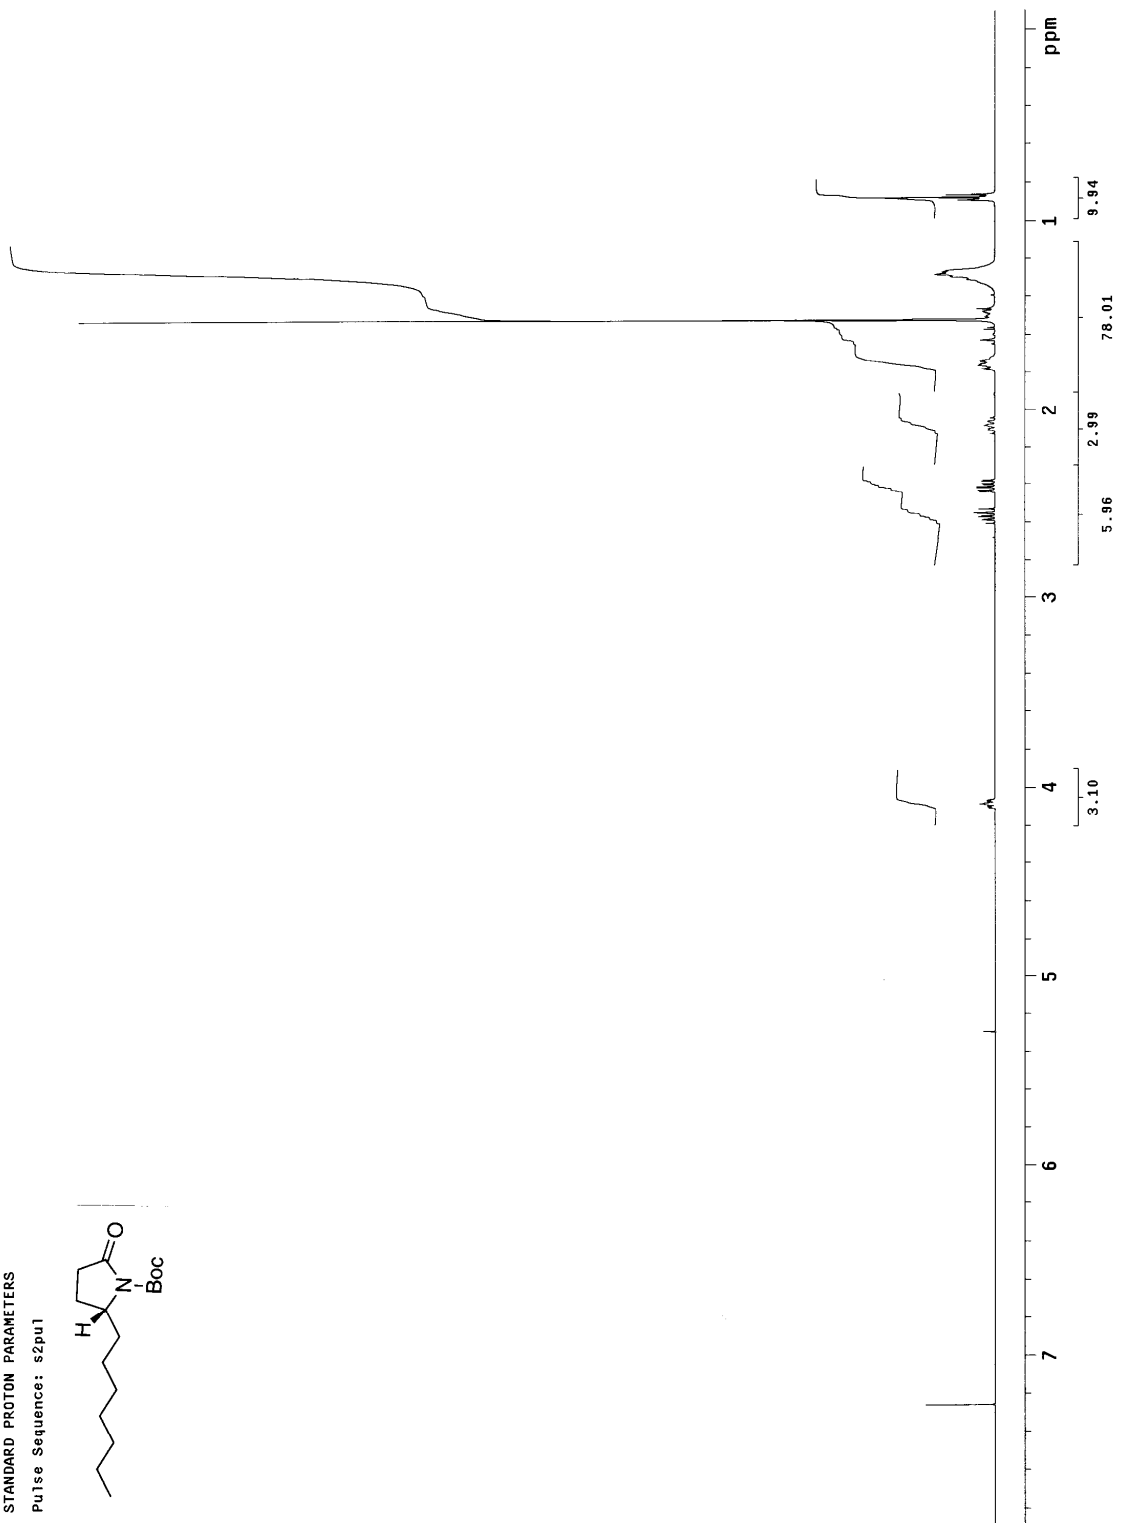

| INDEX | FREQUENCY PPM | HEIGHT  |
|-------|---------------|---------|
| 1     | 13128.364     | 173.996 |
| 2     | 11281.327     | 149.517 |
| 3     | 6202.892      | 82.210  |
| 4     | 5841.542      | 77.421  |
| 5     | 5809.802      | 77.000  |
| 6     | 5778.061      | 76.579  |
| 7     | 4361.959      | 57.811  |
| 8     | 2595.910      | 33.477  |
| 9     | 2376.975      | 31.503  |
| 10    | 2352.359      | 31.160  |
| 11    | 2202.404      | 29.189  |
| 12    | 2187.754      | 28.985  |
| 13    | 2098.638      | 27.814  |
| 14    | 1916.742      | 25.403  |
| 15    | 1689.677      | 22.394  |
| 16    | 1681.132      | 22.281  |
| 17    | 1047.548      | 13.884  |

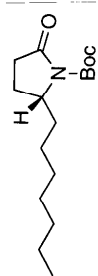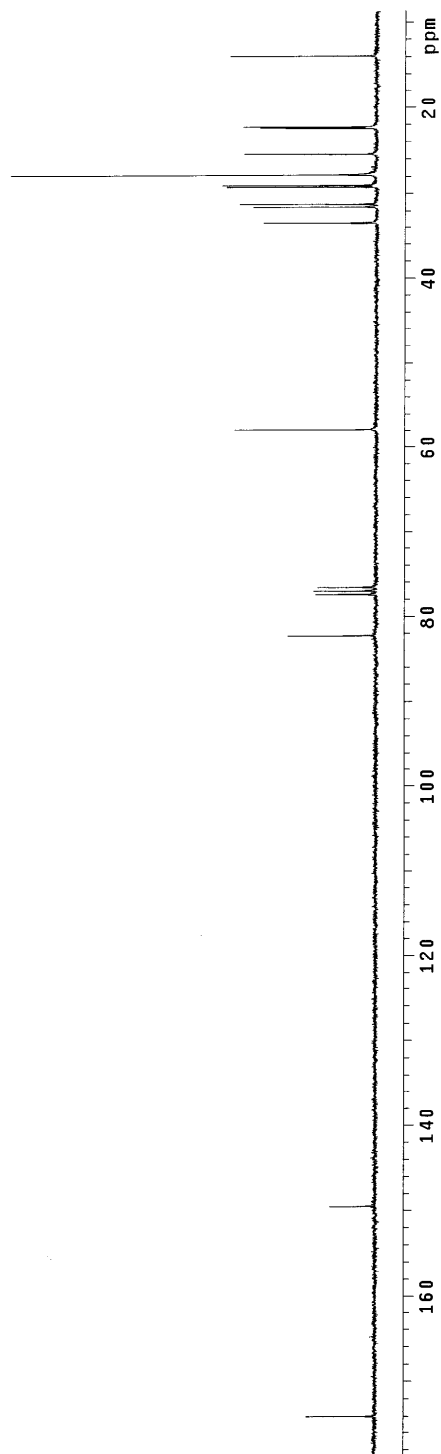

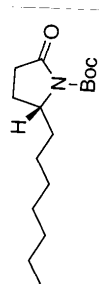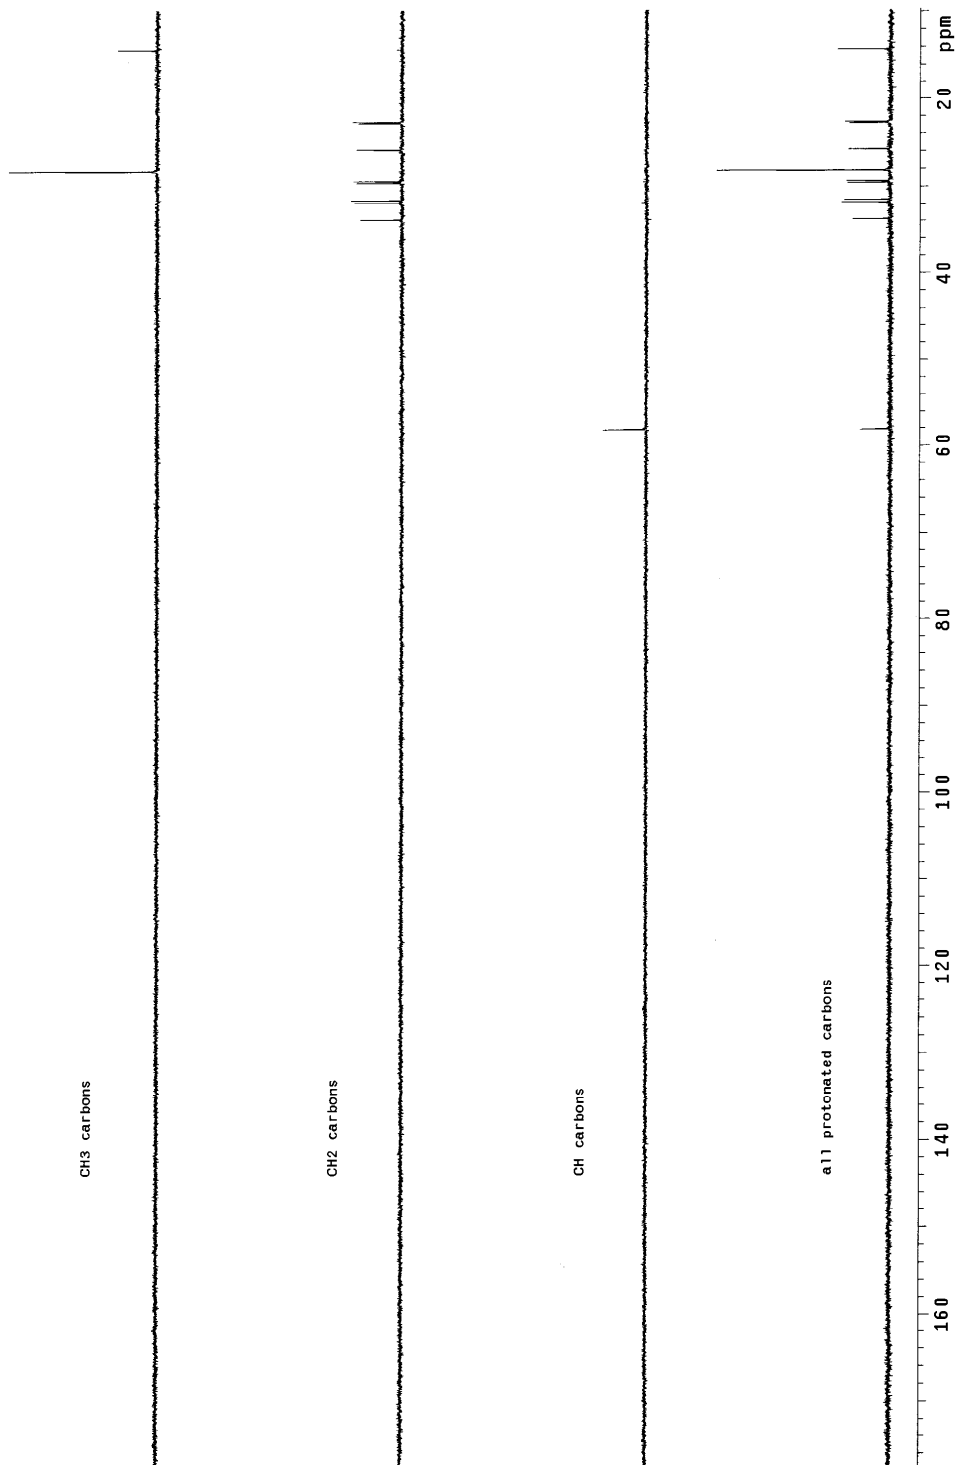

STANDARD 1H OBSERVE

Pulse Sequence: s2pu1

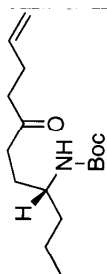**9: R = *n*-Pr**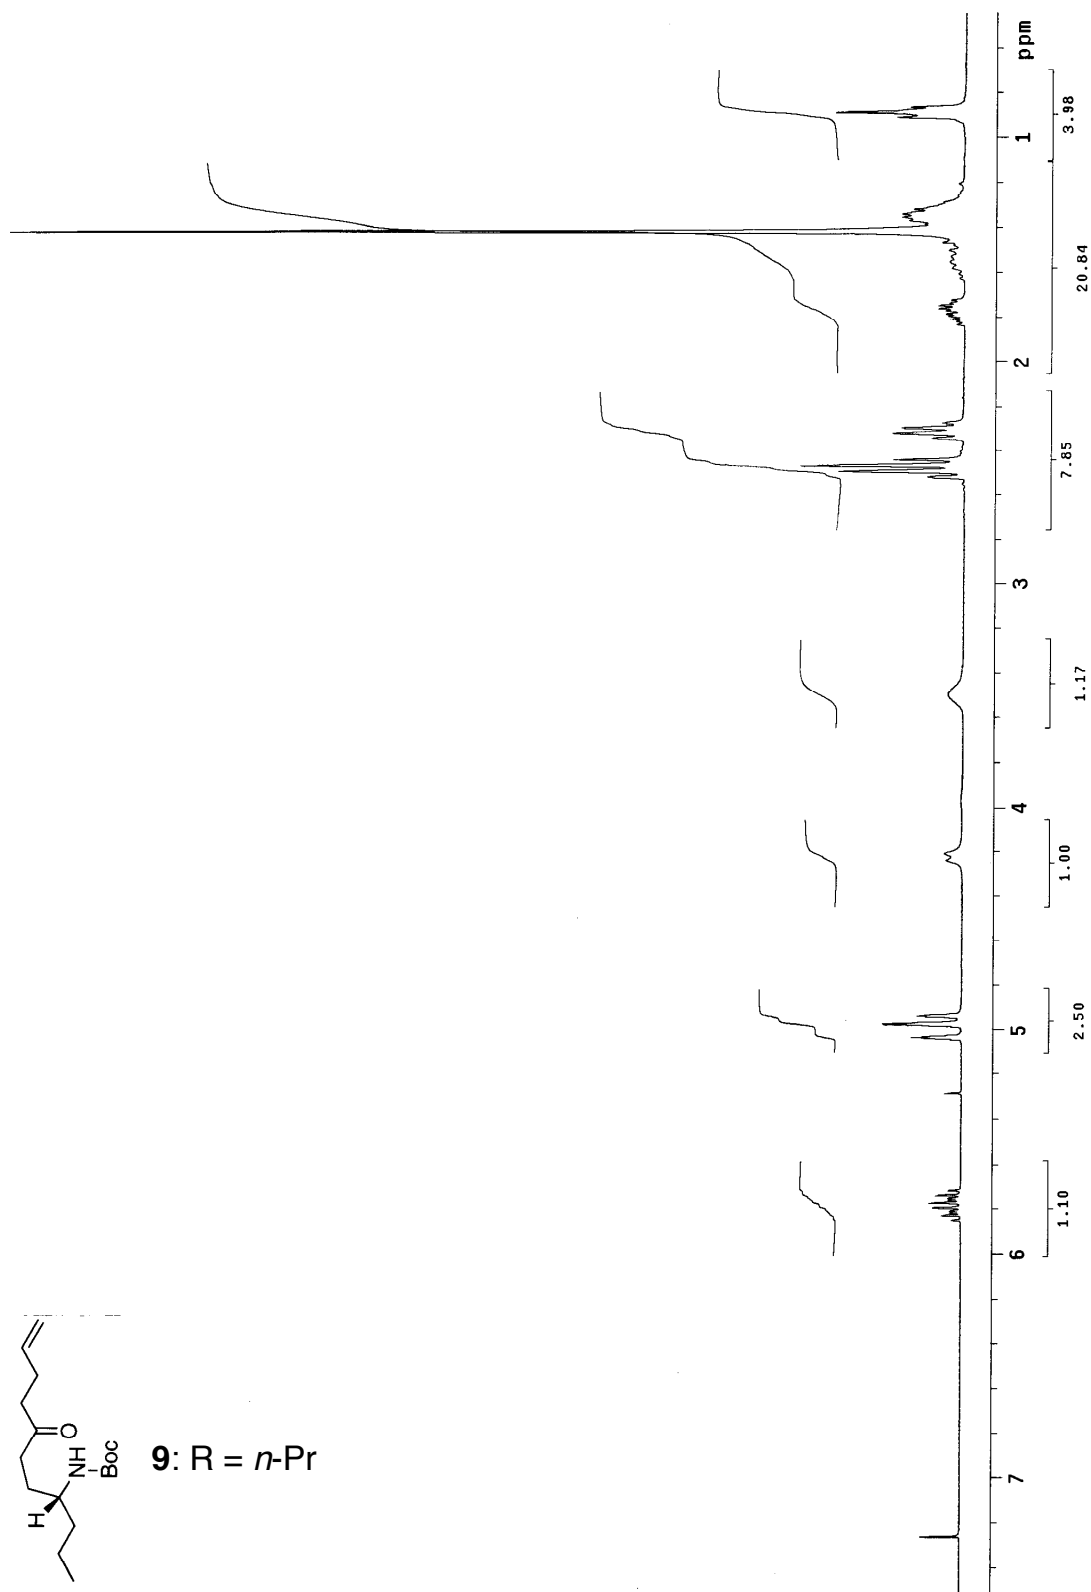

| INDEX | FREQUENCY | PPM     | HEIGHT |
|-------|-----------|---------|--------|
| 1     | 15787.217 | 209.235 | 16.3   |
| 2     | 11723.248 | 155.374 | 19.1   |
| 3     | 10309.588 | 136.688 | 32.1   |
| 4     | 8650.551  | 114.650 | 43.2   |
| 5     | 5903.801  | 78.246  | 24.7   |
| 6     | 5841.542  | 77.421  | 19.3   |
| 7     | 5809.802  | 77.000  | 22.4   |
| 8     | 5778.061  | 76.578  | 19.3   |
| 9     | 3760.116  | 49.835  | 27.6   |
| 10    | 3136.299  | 41.567  | 60.9   |
| 11    | 2949.520  | 39.091  | 31.0   |
| 12    | 2857.961  | 37.878  | 37.9   |
| 13    | 2186.534  | 28.979  | 31.0   |
| 14    | 2119.391  | 28.089  | 162.0  |
| 15    | 2071.780  | 27.458  | 59.7   |
| 16    | 1424.768  | 18.883  | 38.1   |
| 17    | 1031.678  | 13.673  | 40.8   |

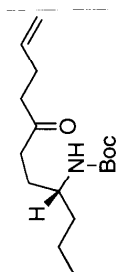

**9: R = *n*-Pr**

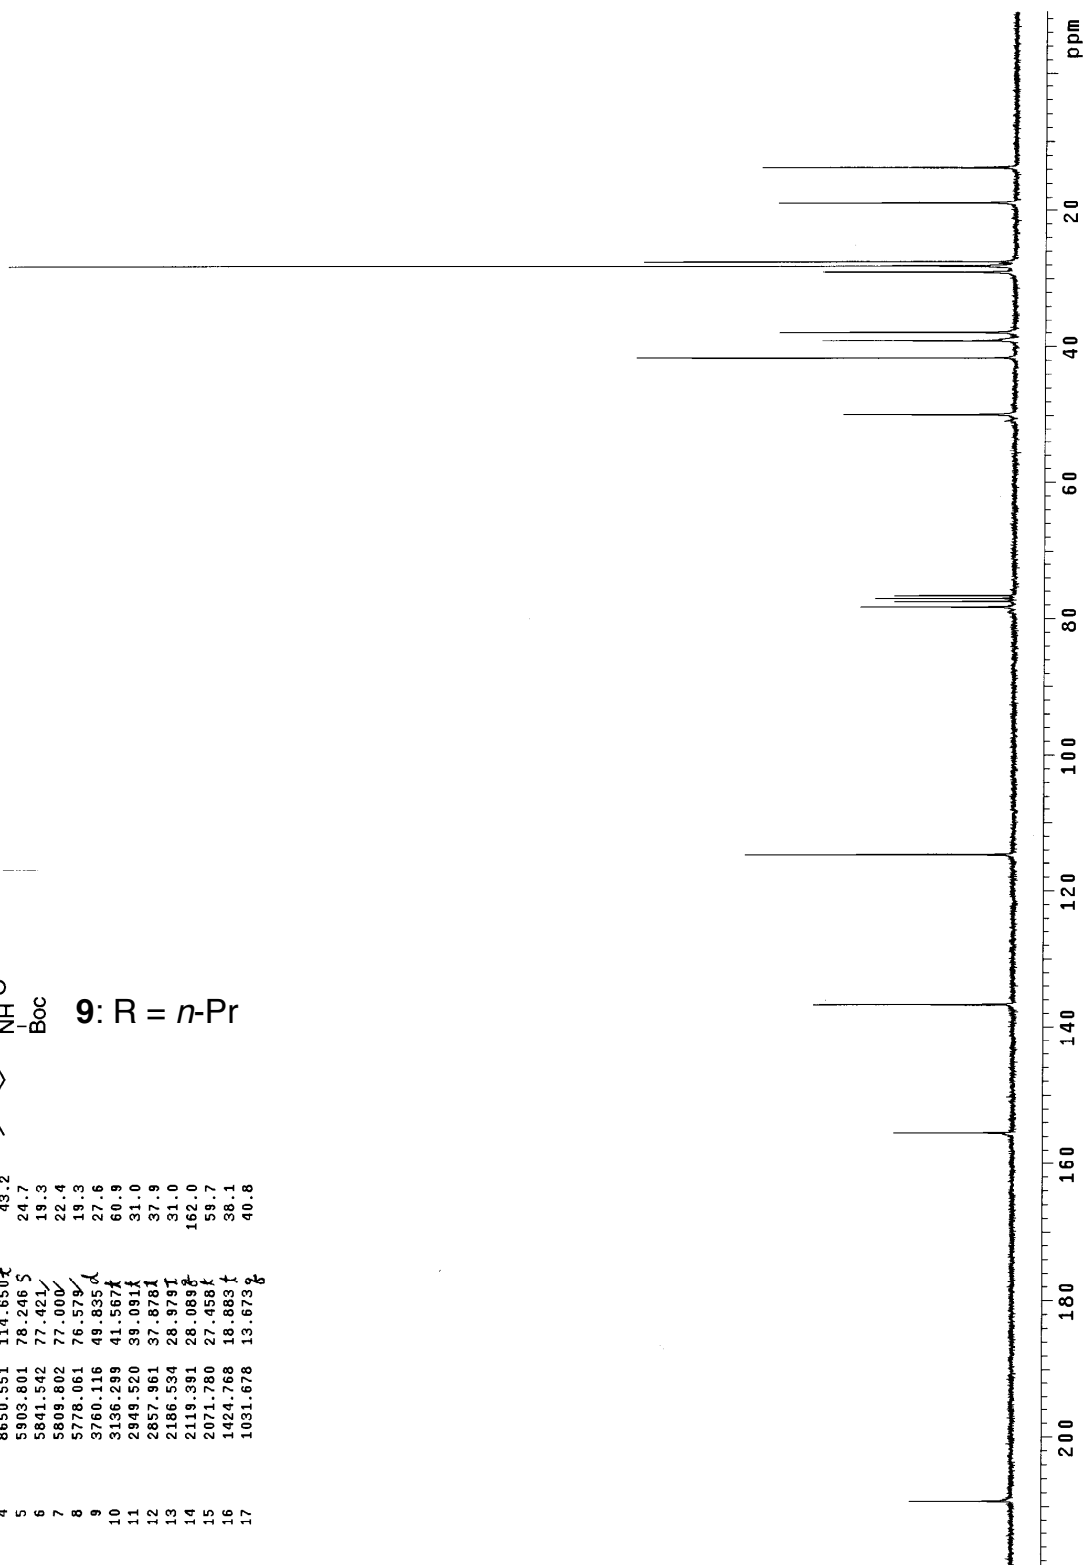

9: R = *n*-Pr

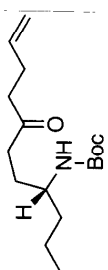

CH3 carbons

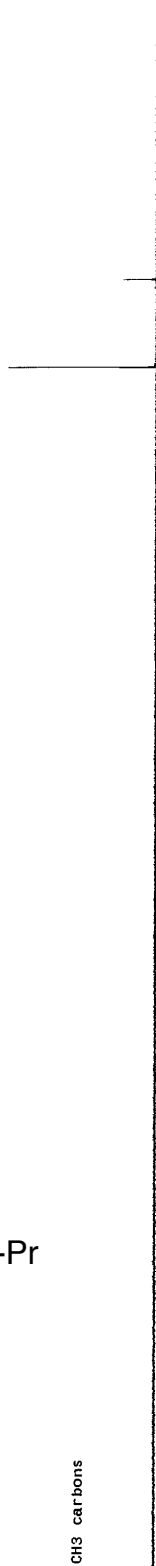

CH2 carbons

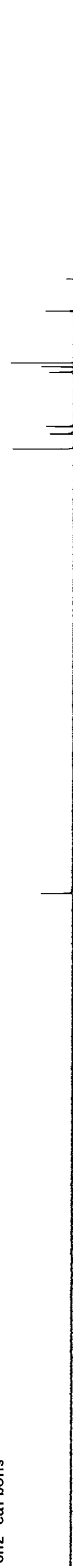

CH carbons

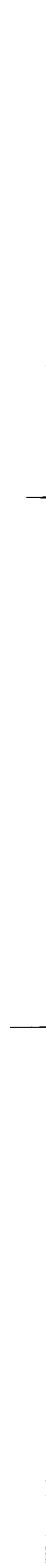

all protonated carbons

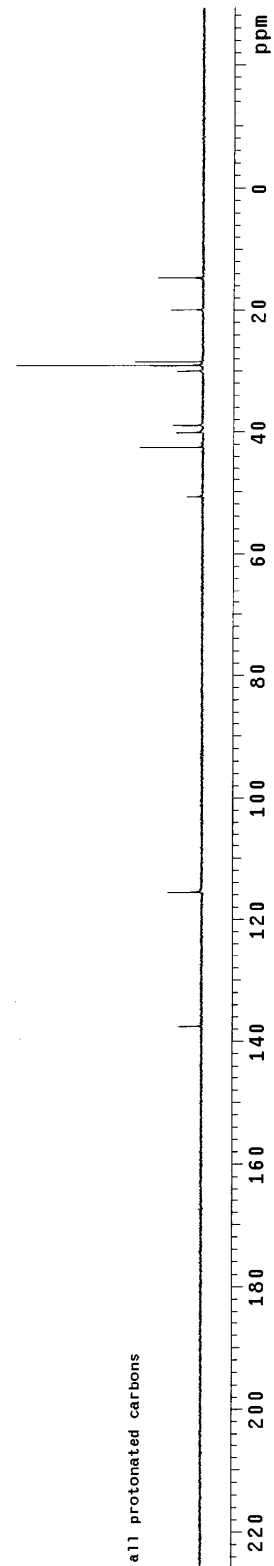

## STANDARD PROTON PARAMETERS

Pulse Sequence: s2pu1

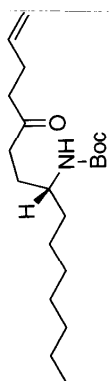**9:** R =  $n\text{-C}_7\text{H}_{15}$ 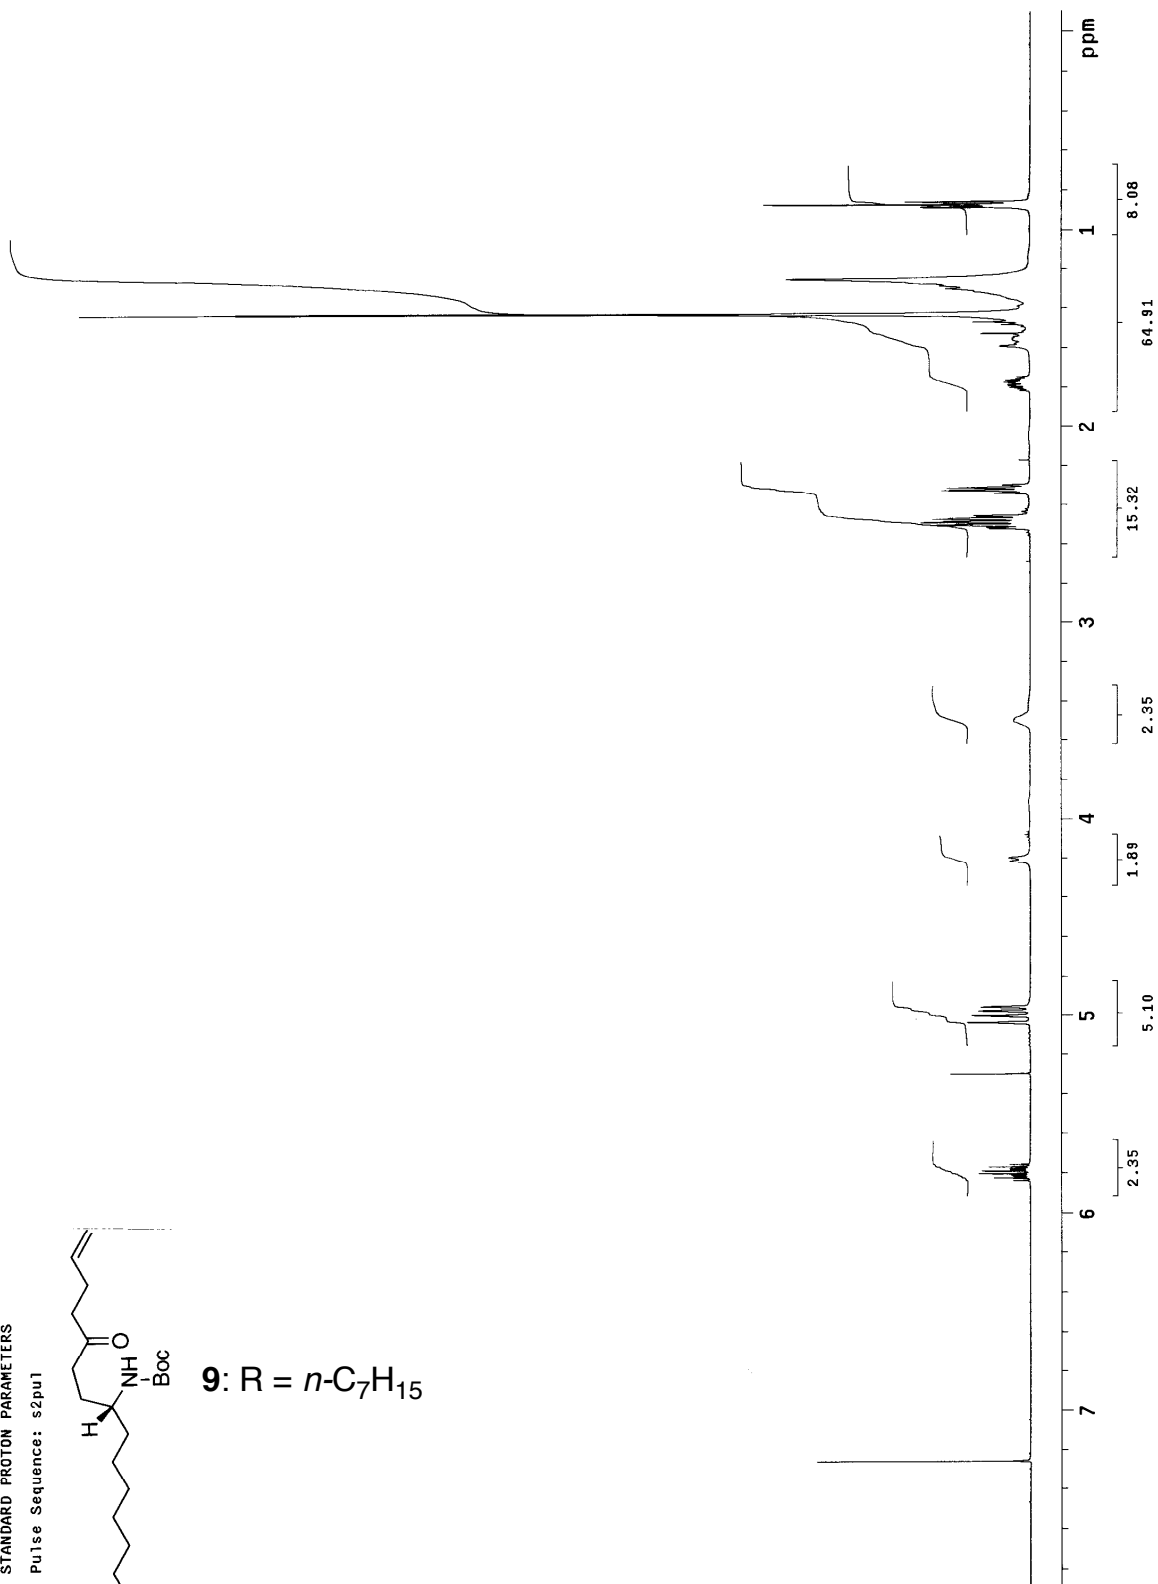



| INDEX | FREQUENCY | PPM       | HEIGHT |
|-------|-----------|-----------|--------|
| 1     | 15803.087 | 209.446 S | 2.7    |
| 2     | 11733.014 | 155.503 S | 6.3    |
| 3     | 10320.574 | 136.783 d | 9.7    |
| 4     | 8683.979  | 114.828 c | 10.3   |
| 5     | 5928.217  | 78.569 S  | 3.4    |
| 6     | 5841.541  | 77.421    | 6.7    |
| 7     | 5809.801  | 77.000    | 6.8    |
| 8     | 5776.840  | 76.563    | 6.6    |
| 9     | 3783.076  | 50.271 d  | 7.2    |
| 10    | 3152.168  | 41.777 f  | 13.7   |
| 11    | 2966.610  | 39.318 f  | 8.2    |
| 12    | 2710.247  | 35.920 f  | 8.8    |
| 13    | 2386.741  | 31.633 f  | 17.0   |
| 14    | 2212.169  | 29.319 f  | 16.2   |
| 15    | 2189.862  | 29.157 f  | 11.9   |
| 16    | 2185.079  | 29.092 f  | 21.1   |
| 17    | 2131.598  | 28.251 f  | 50.7   |
| 18    | 2083.988  | 27.620 f  | 18.3   |
| 19    | 1946.040  | 25.782 f  | 18.4   |
| 20    | 1698.222  | 22.507 f  | 17.1   |
| 21    | 1093.651  | 13.965 g  | 17.3   |

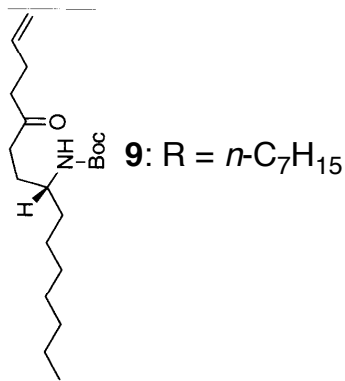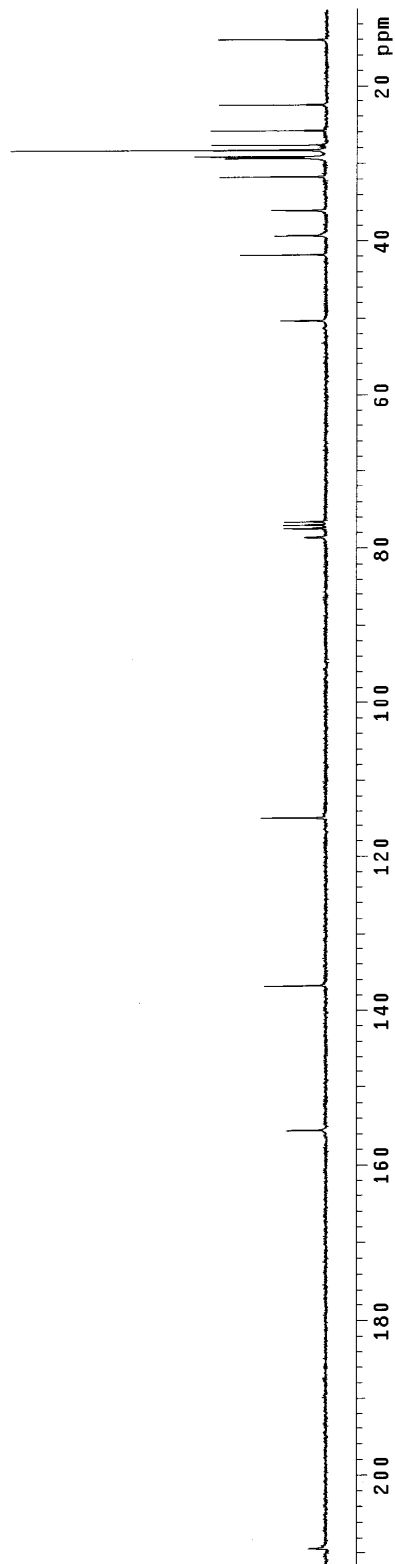

**9:** R =  $n\text{-C}_7\text{H}_{15}$

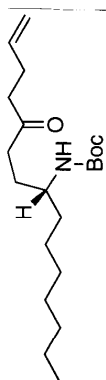

CH<sub>3</sub> carbons

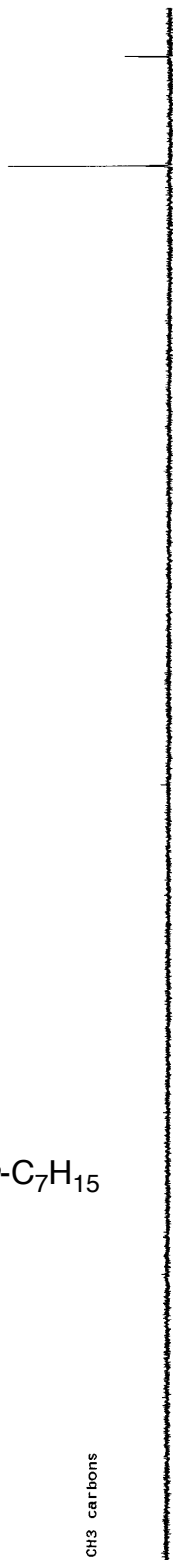

CH<sub>2</sub> carbons

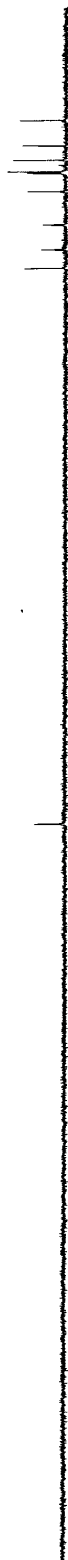

CH carbons

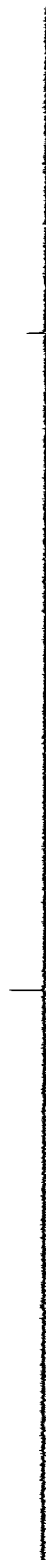

all protonated carbons

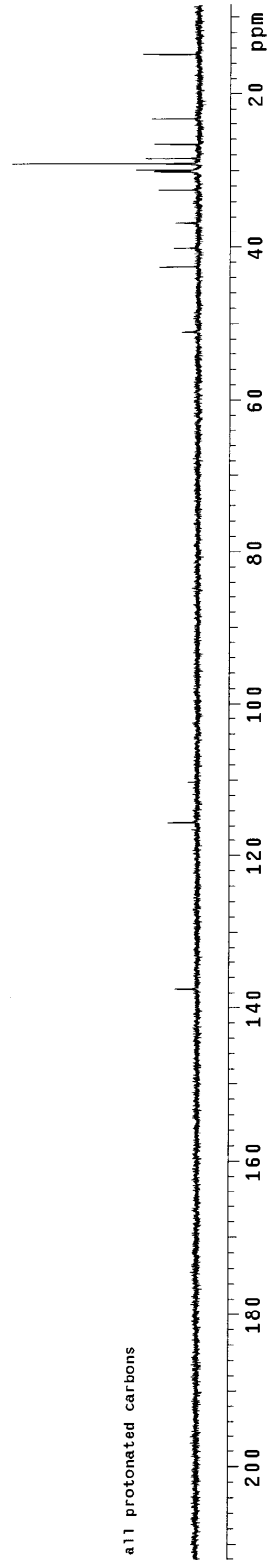

## STANDARD PROTON PARAMETERS

Pulse Sequence: s2pu1

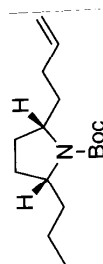ent-4: R = *n*-Pr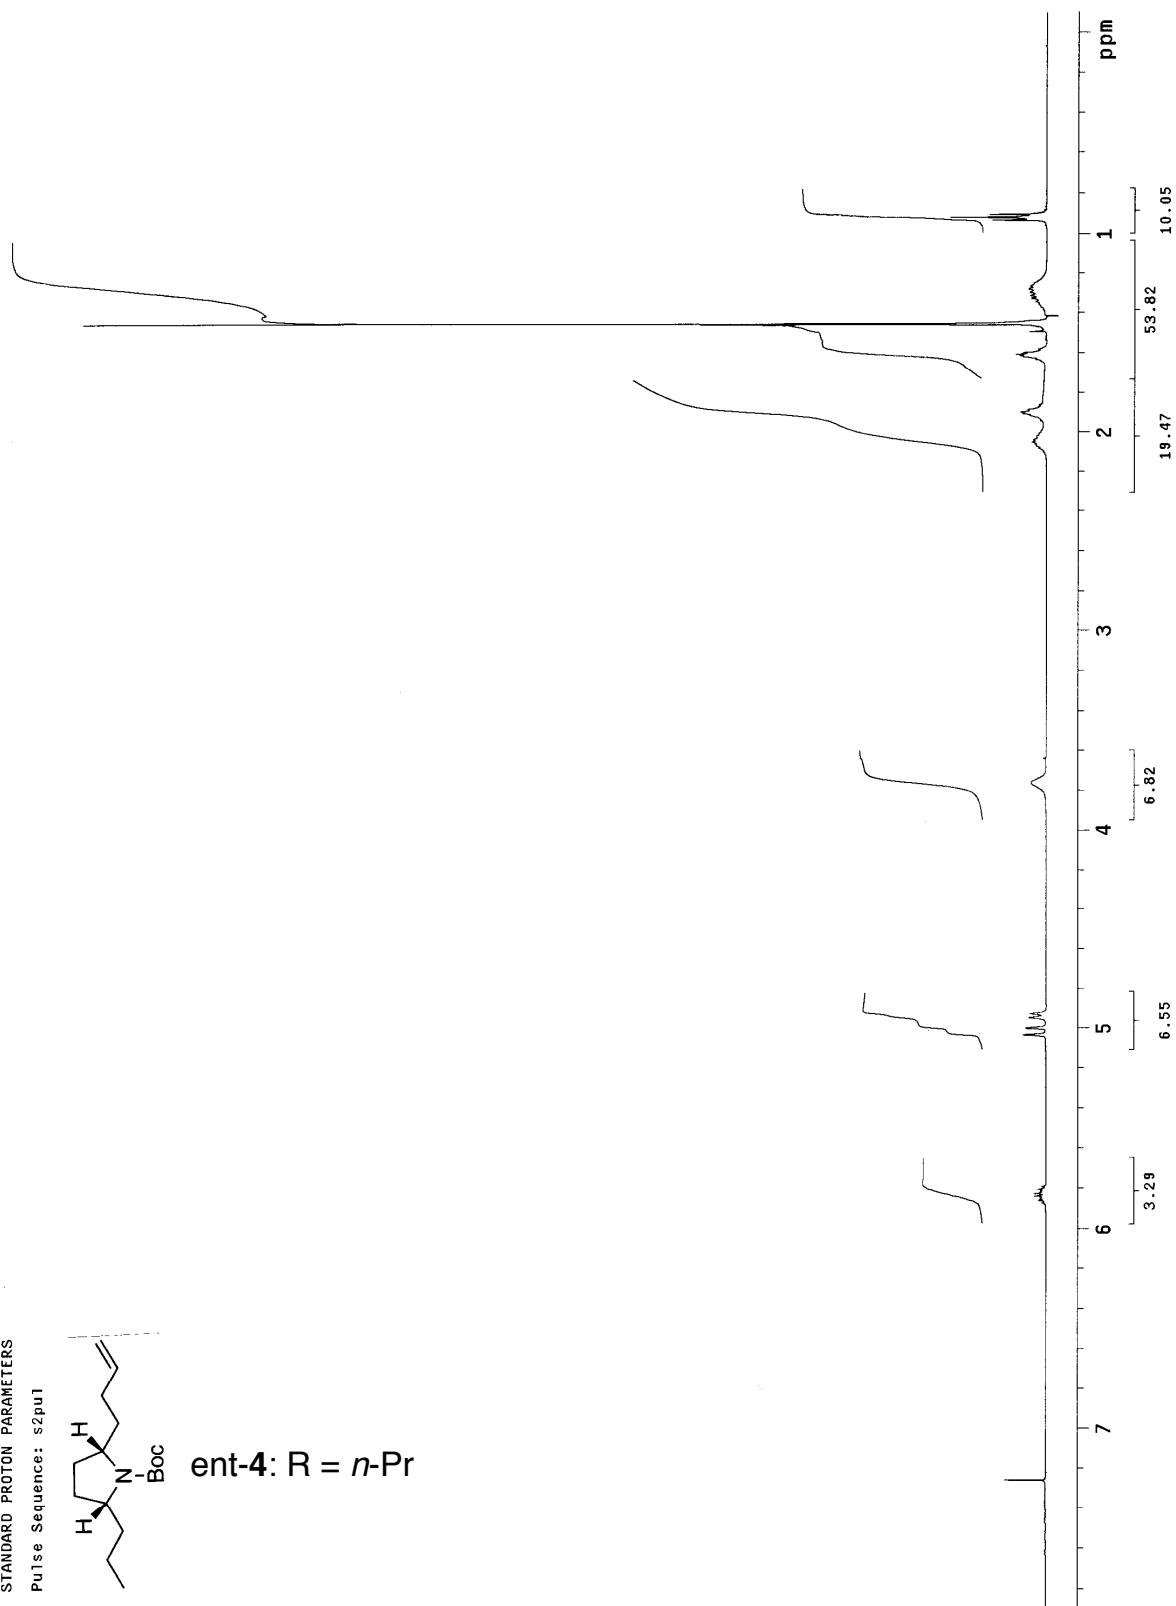

| INDEX | FREQUENCY | PPM                  | HEIGHT |
|-------|-----------|----------------------|--------|
| 1     | 11654.885 | 154.468 <sup>o</sup> | 8.3    |
| 2     | 10414.574 | 138.029 <sup>o</sup> | 12.9   |
| 3     | 8606.603  | 114.067 <sup>o</sup> | 19.2   |
| 4     | 5918.450  | 78.440 <sup>o</sup>  | 13.4   |
| 5     | 5841.541  | 77.421 <sup>o</sup>  | 6.2    |
| 6     | 5809.801  | 77.000 <sup>o</sup>  | 7.2    |
| 7     | 5778.061  | 76.579 <sup>o</sup>  | 7.8    |
| 8     | 4371.725  | 57.941 <sup>o</sup>  | 8.0    |
| 9     | 4348.751  | 57.648 <sup>o</sup>  | 11.2   |
| 10    | 2870.169  | 38.040 <sup>o</sup>  | 4.6    |
| 11    | 2639.442  | 34.982 <sup>o</sup>  | 5.8    |
| 12    | 2308.611  | 30.587 <sup>o</sup>  | 17.2   |
| 13    | 2208.507  | 29.270 <sup>o</sup>  | 4.8    |
| 14    | 2138.923  | 28.348 <sup>o</sup>  | 74.8   |
| 15    | 1467.495  | 19.449 <sup>o</sup>  | 14.0   |
| 16    | 1057.314  | 14.013 <sup>o</sup>  | 27.9   |

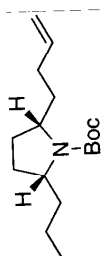

ent-4: R = *n*-Pr

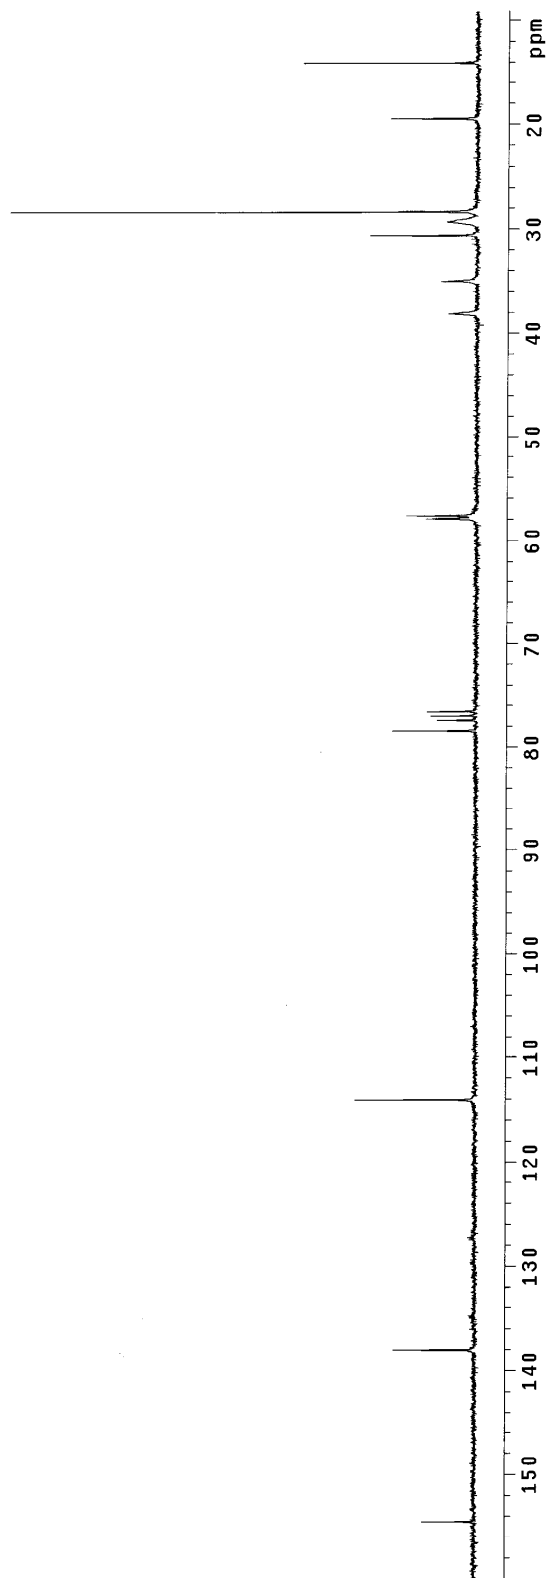

ent-4: R = *n*-Pr

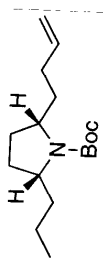

CH3 carbons

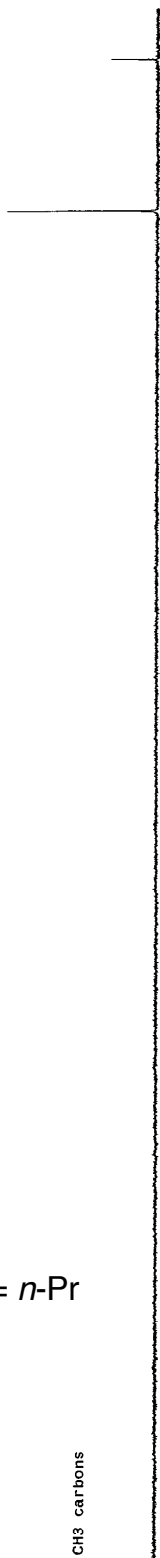

CH2 carbons

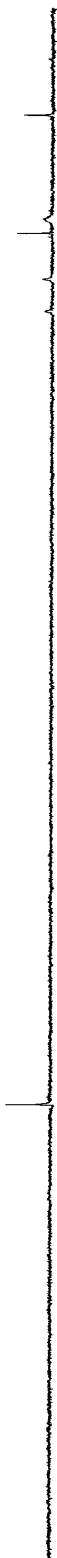

CH carbons

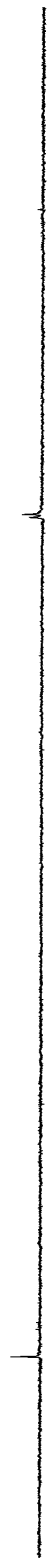

all protonated carbons

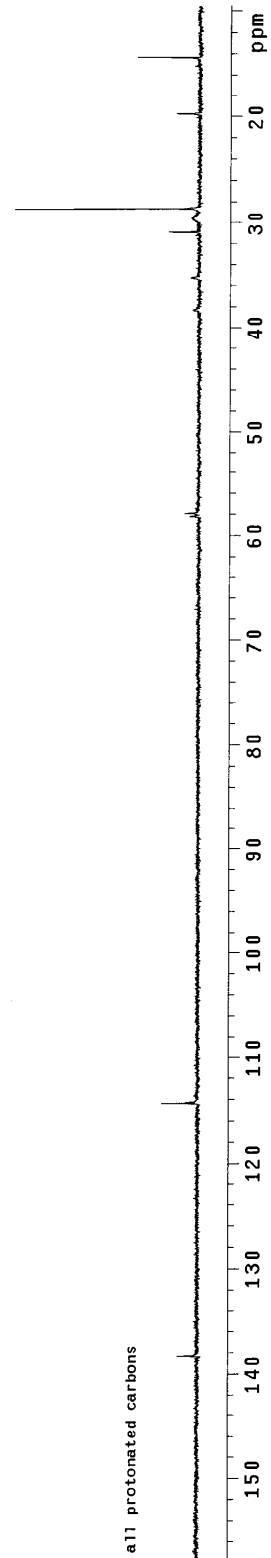

STANDARD 1H OBSERVE

Pulse Sequence: s2pu1

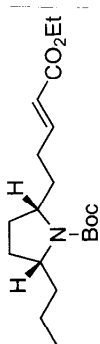ent-5: R = *n*-Pr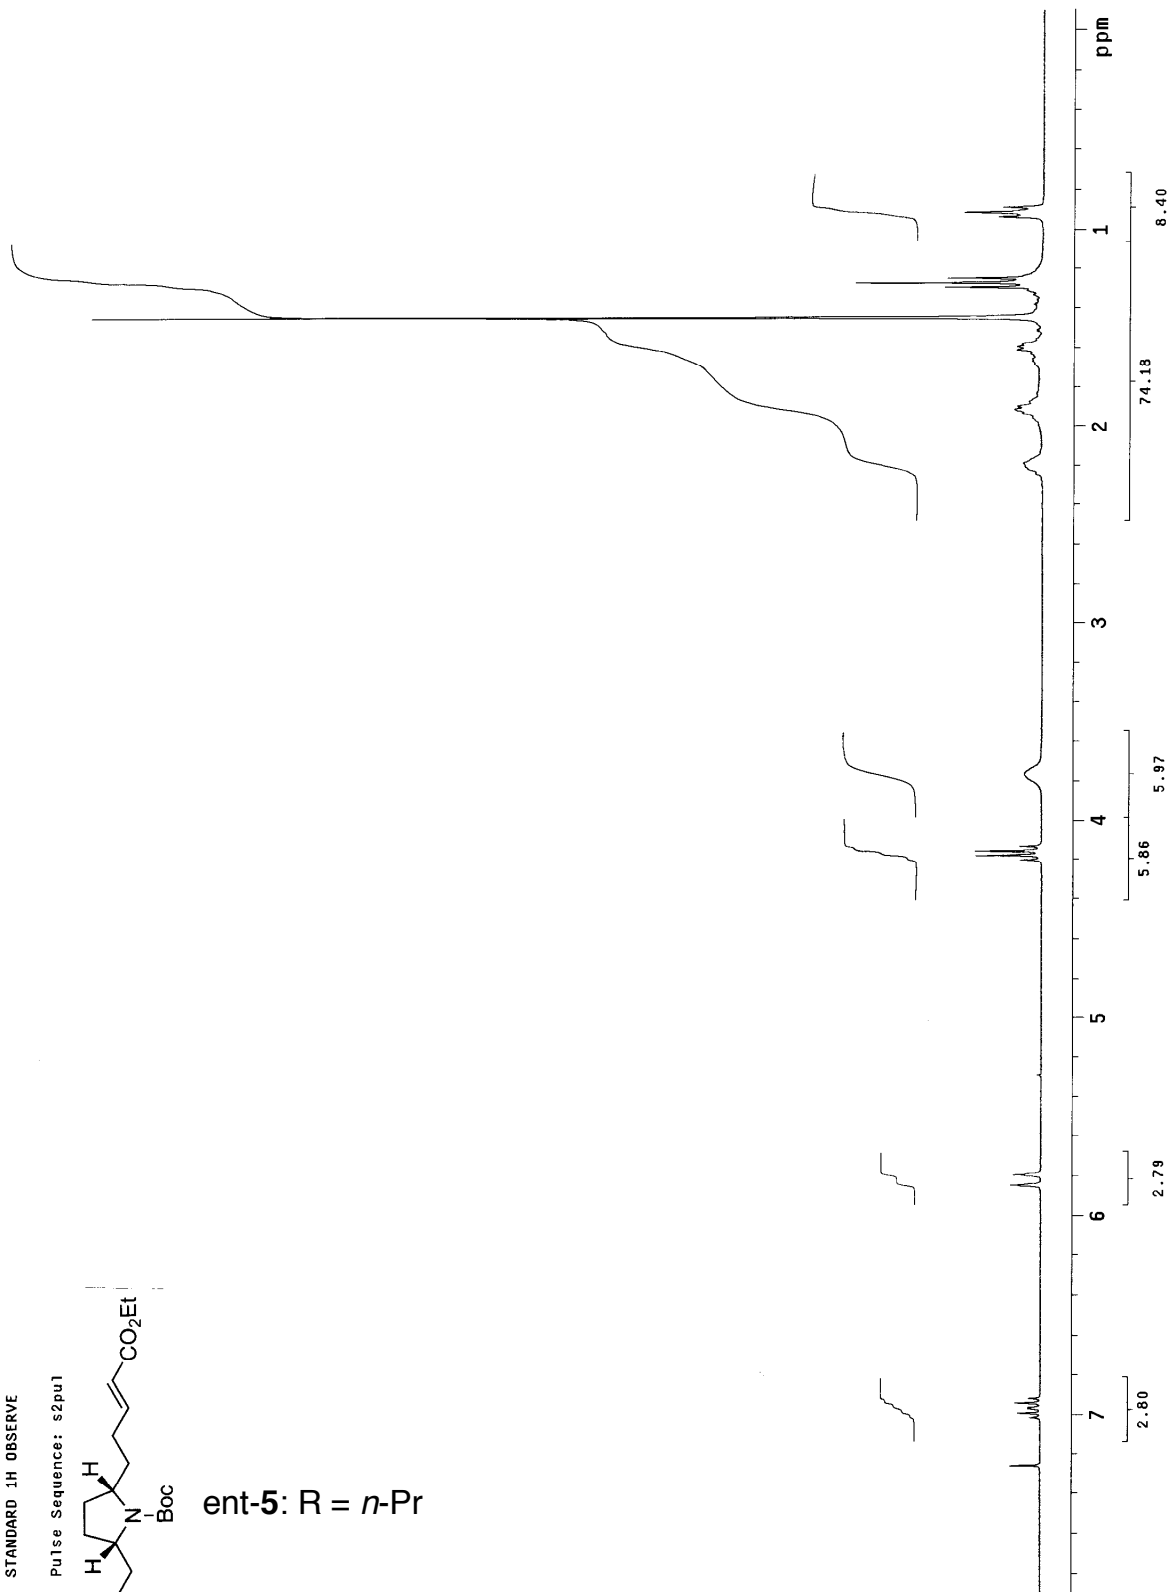

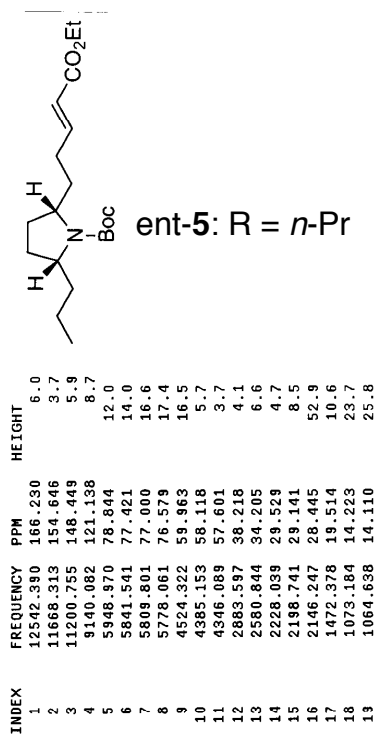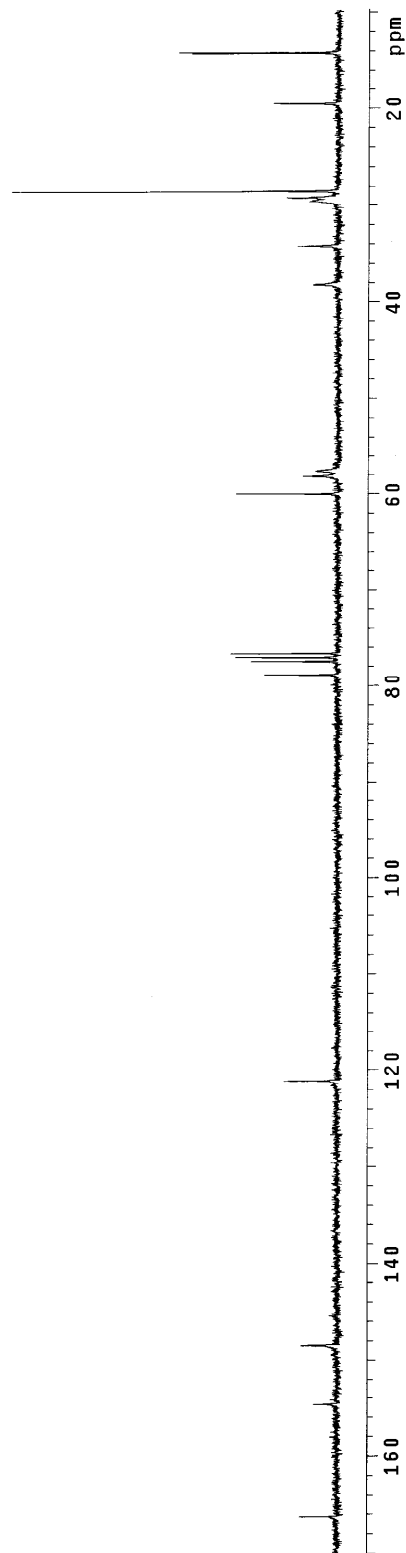

ent-5: R = *n*-Pr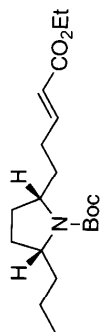

CH3 carbons

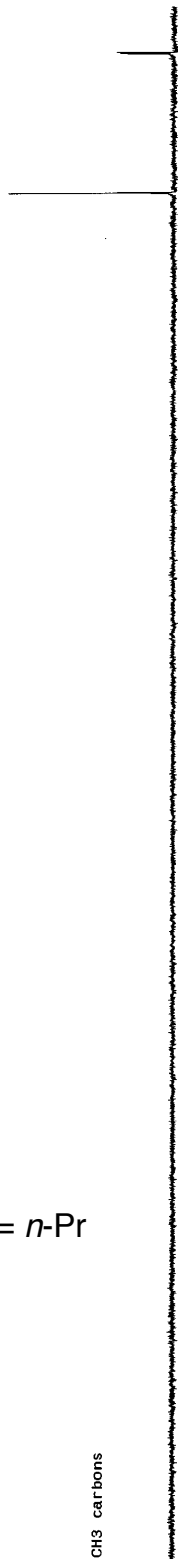

CH2 carbons

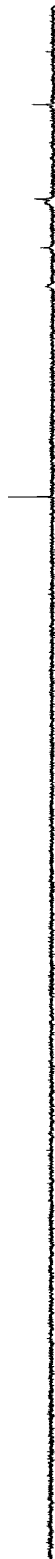

CH carbons

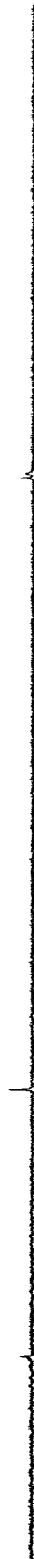

all protonated carbons

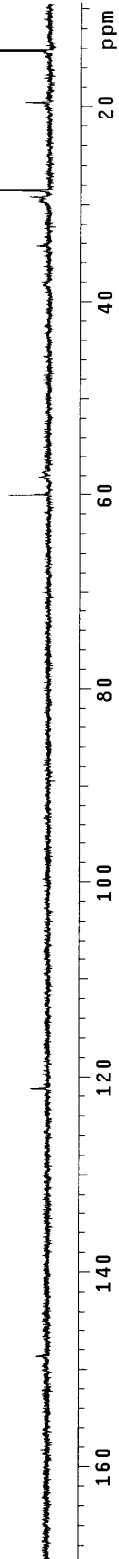





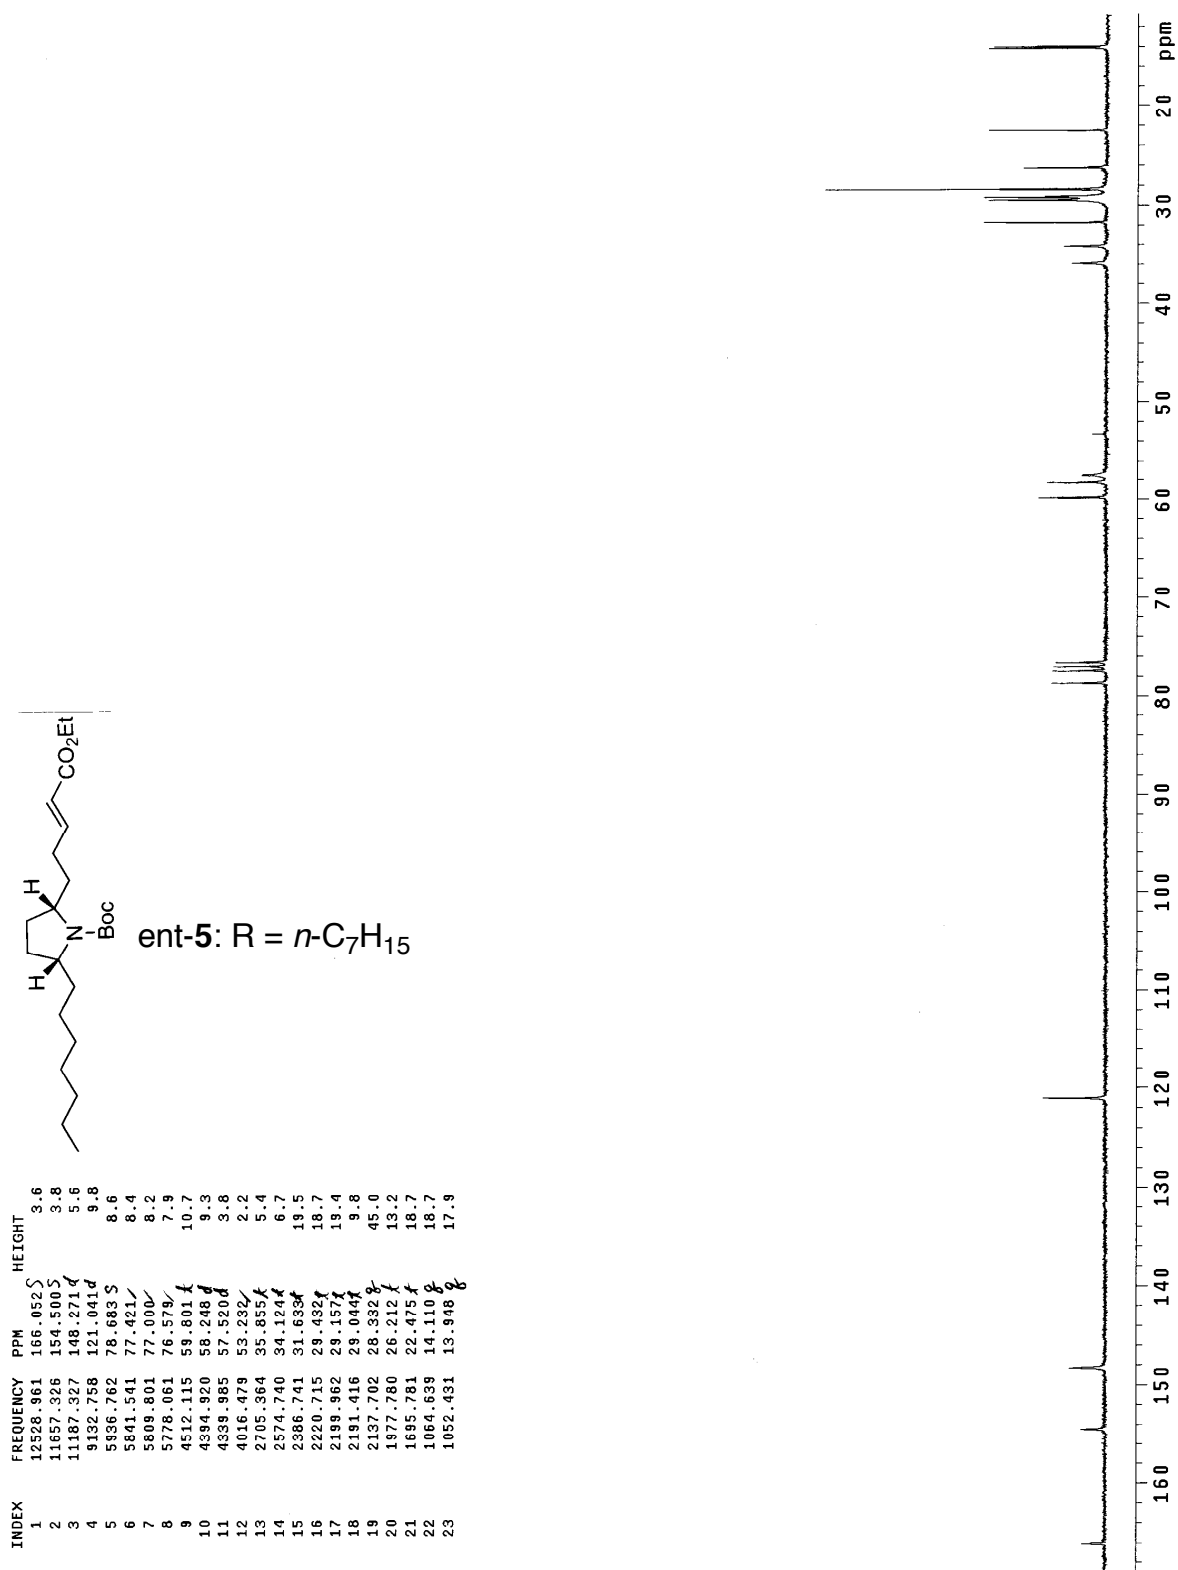

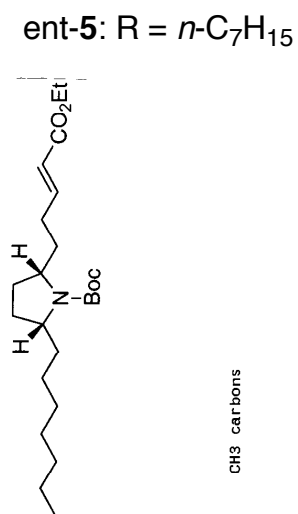

CH3 carbons

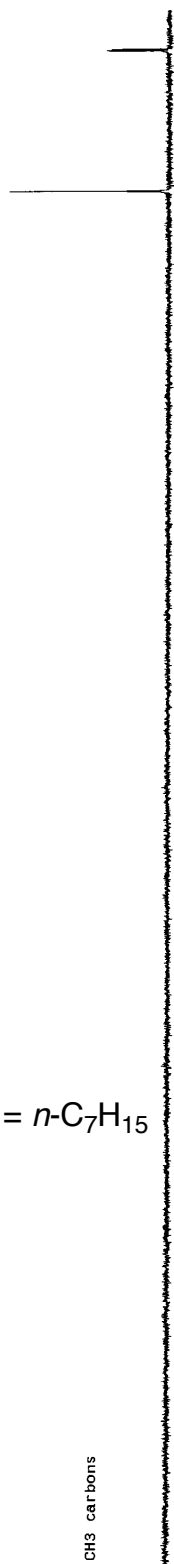

CH2 carbons

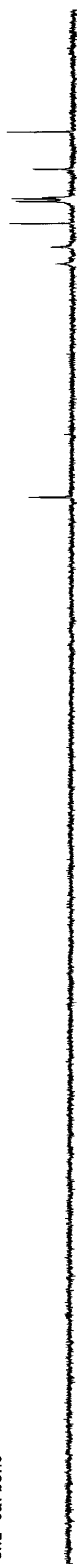

CH carbons

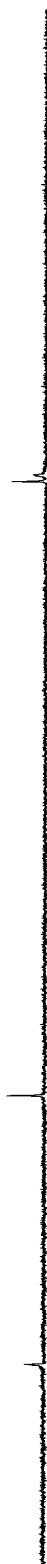

all protonated carbons

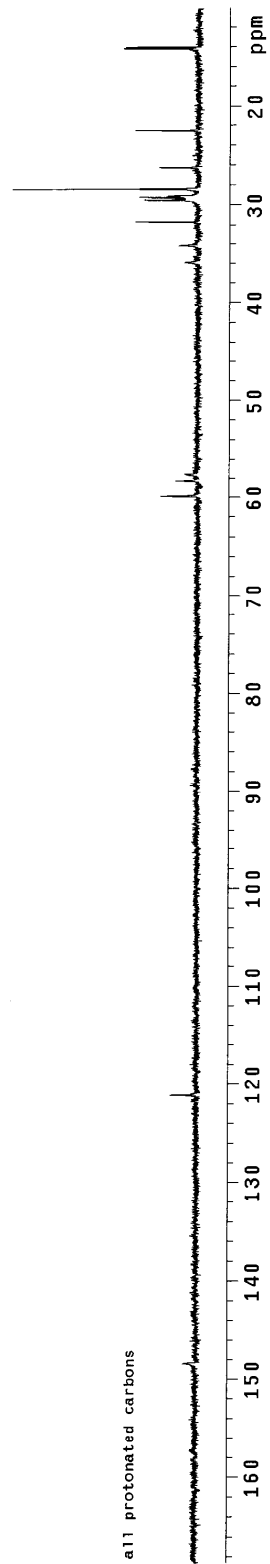

h  
Pulse Sequence: s2pu1

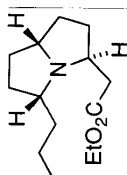

ent-6: R = *n*-Pr

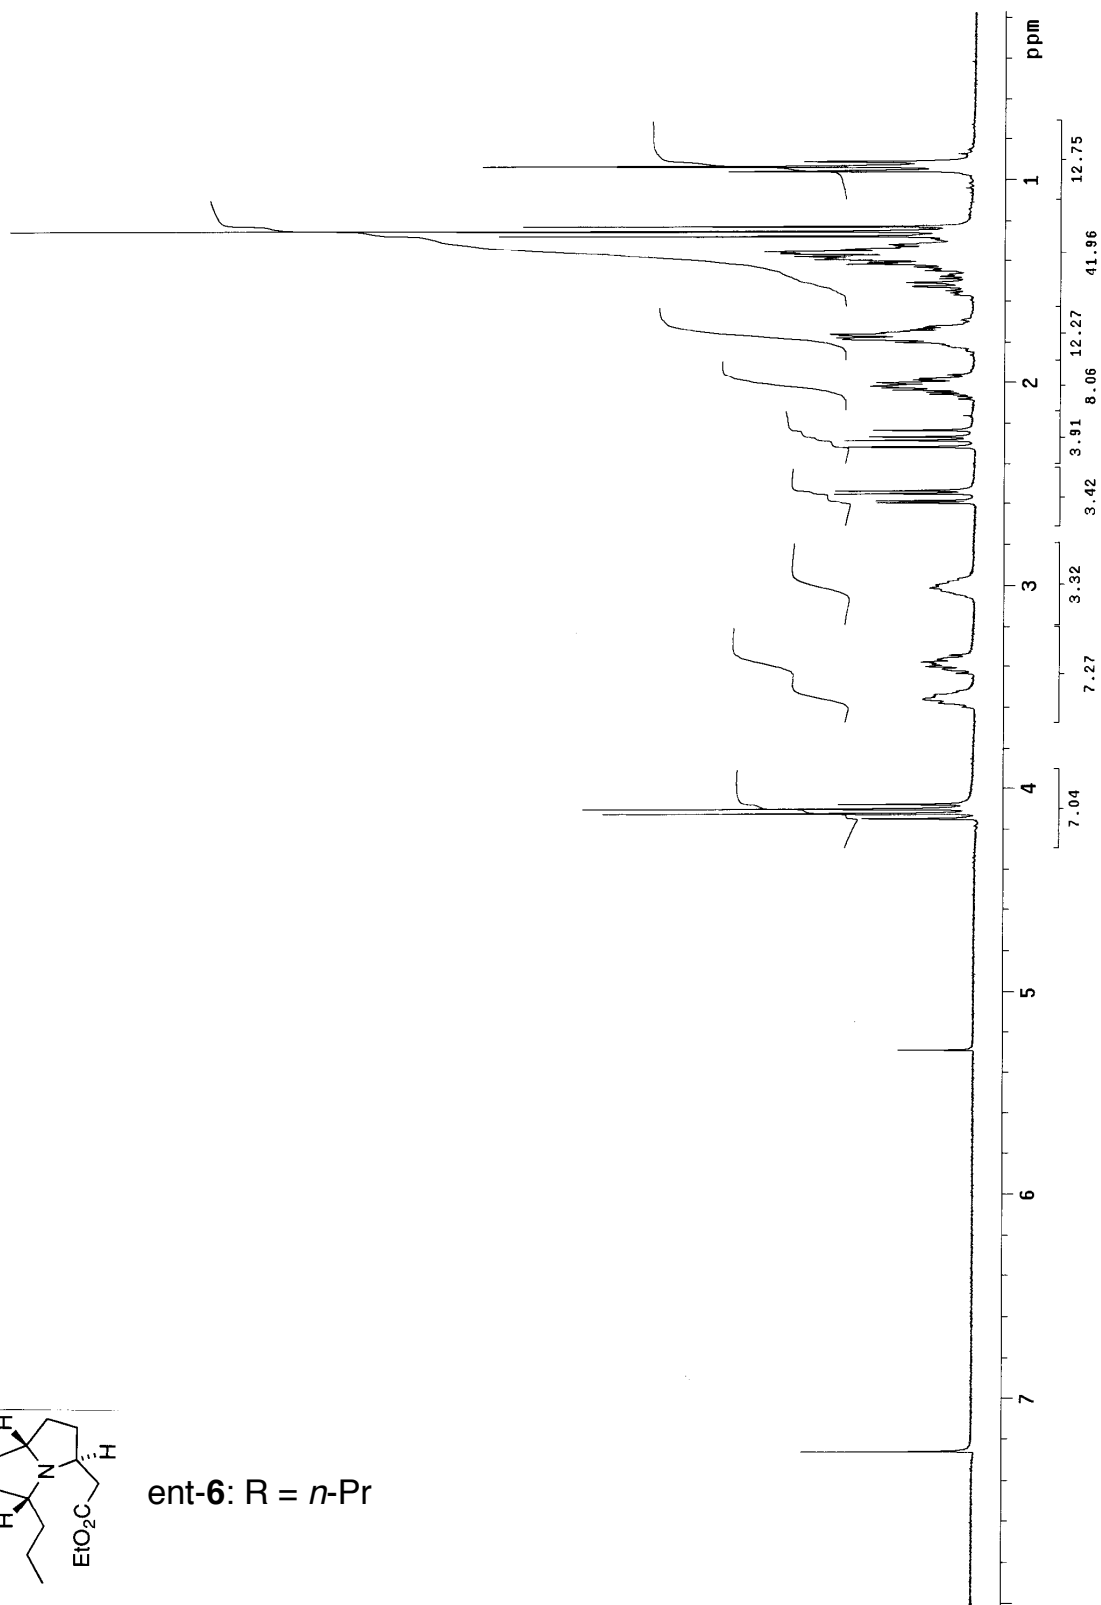

| INDEX | FREQUENCY | PPM                  | HEIGHT |
|-------|-----------|----------------------|--------|
| 1     | 12872.103 | 171.925 <sup>5</sup> | 16.5   |
| 2     | 5841.541  | 77.421 <sup>1</sup>  | 16.9   |
| 3     | 5809.801  | 77.000 <sup>1</sup>  | 15.9   |
| 4     | 5776.840  | 76.563 <sup>1</sup>  | 14.9   |
| 5     | 4943.049  | 65.513 <sup>1</sup>  | 35.0   |
| 6     | 4783.127  | 63.393 <sup>1</sup>  | 38.7   |
| 7     | 4518.218  | 59.882 <sup>1</sup>  | 33.0   |
| 8     | 4076.237  | 54.025 <sup>1</sup>  | 27.9   |
| 9     | 3255.934  | 43.152 <sup>1</sup>  | 29.3   |
| 10    | 2521.026  | 33.412 <sup>1</sup>  | 31.5   |
| 11    | 2434.351  | 32.264 <sup>1</sup>  | 28.8   |
| 12    | 2357.442  | 31.244 <sup>1</sup>  | 28.8   |
| 13    | 2314.715  | 30.678 <sup>1</sup>  | 28.4   |
| 14    | 2267.104  | 30.047 <sup>1</sup>  | 28.4   |
| 15    | 1696.664  | 21.294 <sup>1</sup>  | 35.1   |
| 16    | 1078.067  | 14.288 <sup>1</sup>  | 27.3   |
| 17    | 1067.080  | 14.143 <sup>1</sup>  | 29.9   |

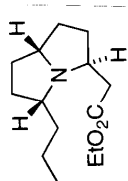

ent-6: R = *n*-Pr

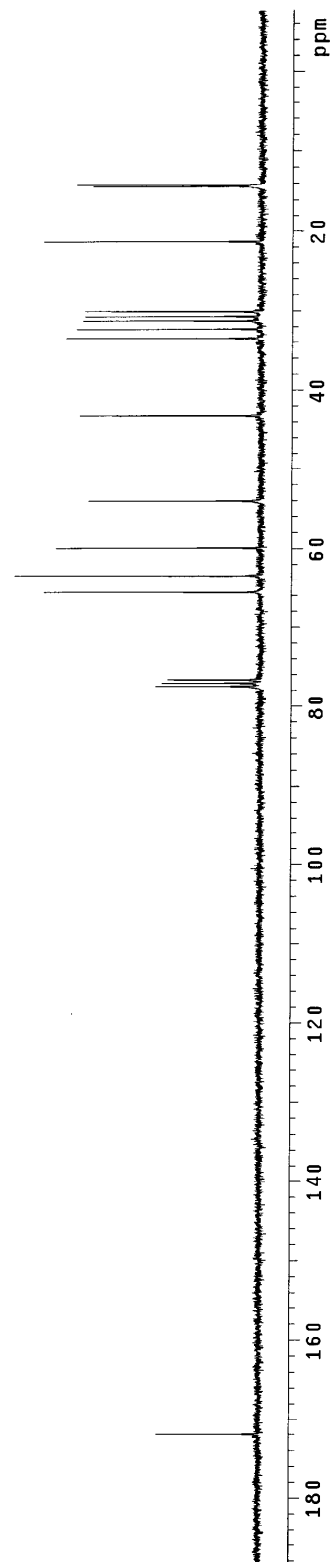

ent-6: R = *n*-Pr

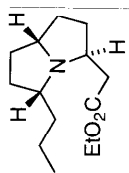

CH3 carbons

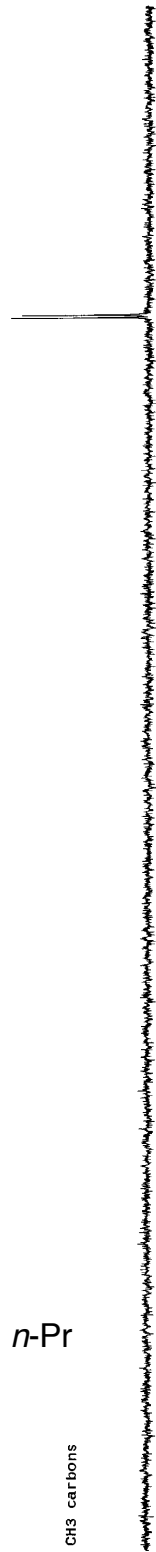

CH2 carbons

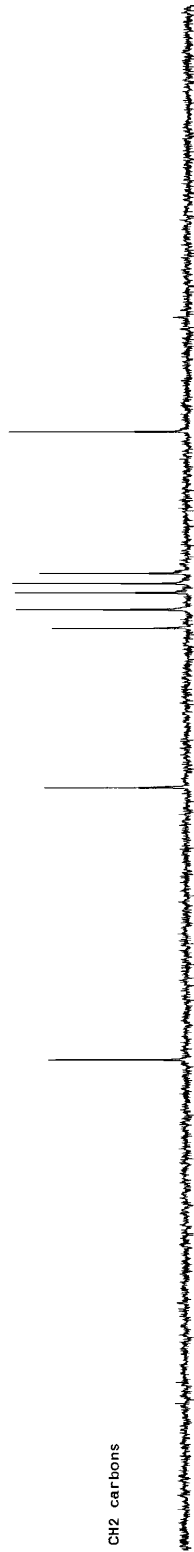

CH carbons

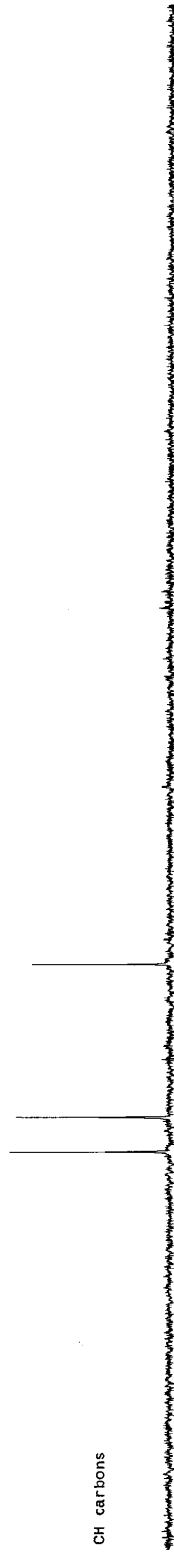

all protonated carbons

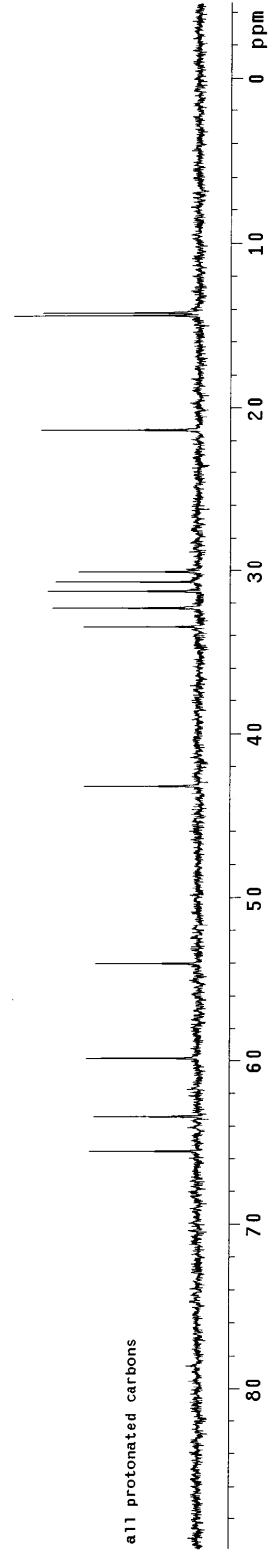

STANDARD PROTON PARAMETERS  
Pulse Sequence: s2pu1

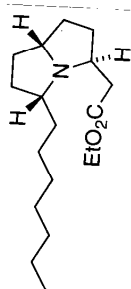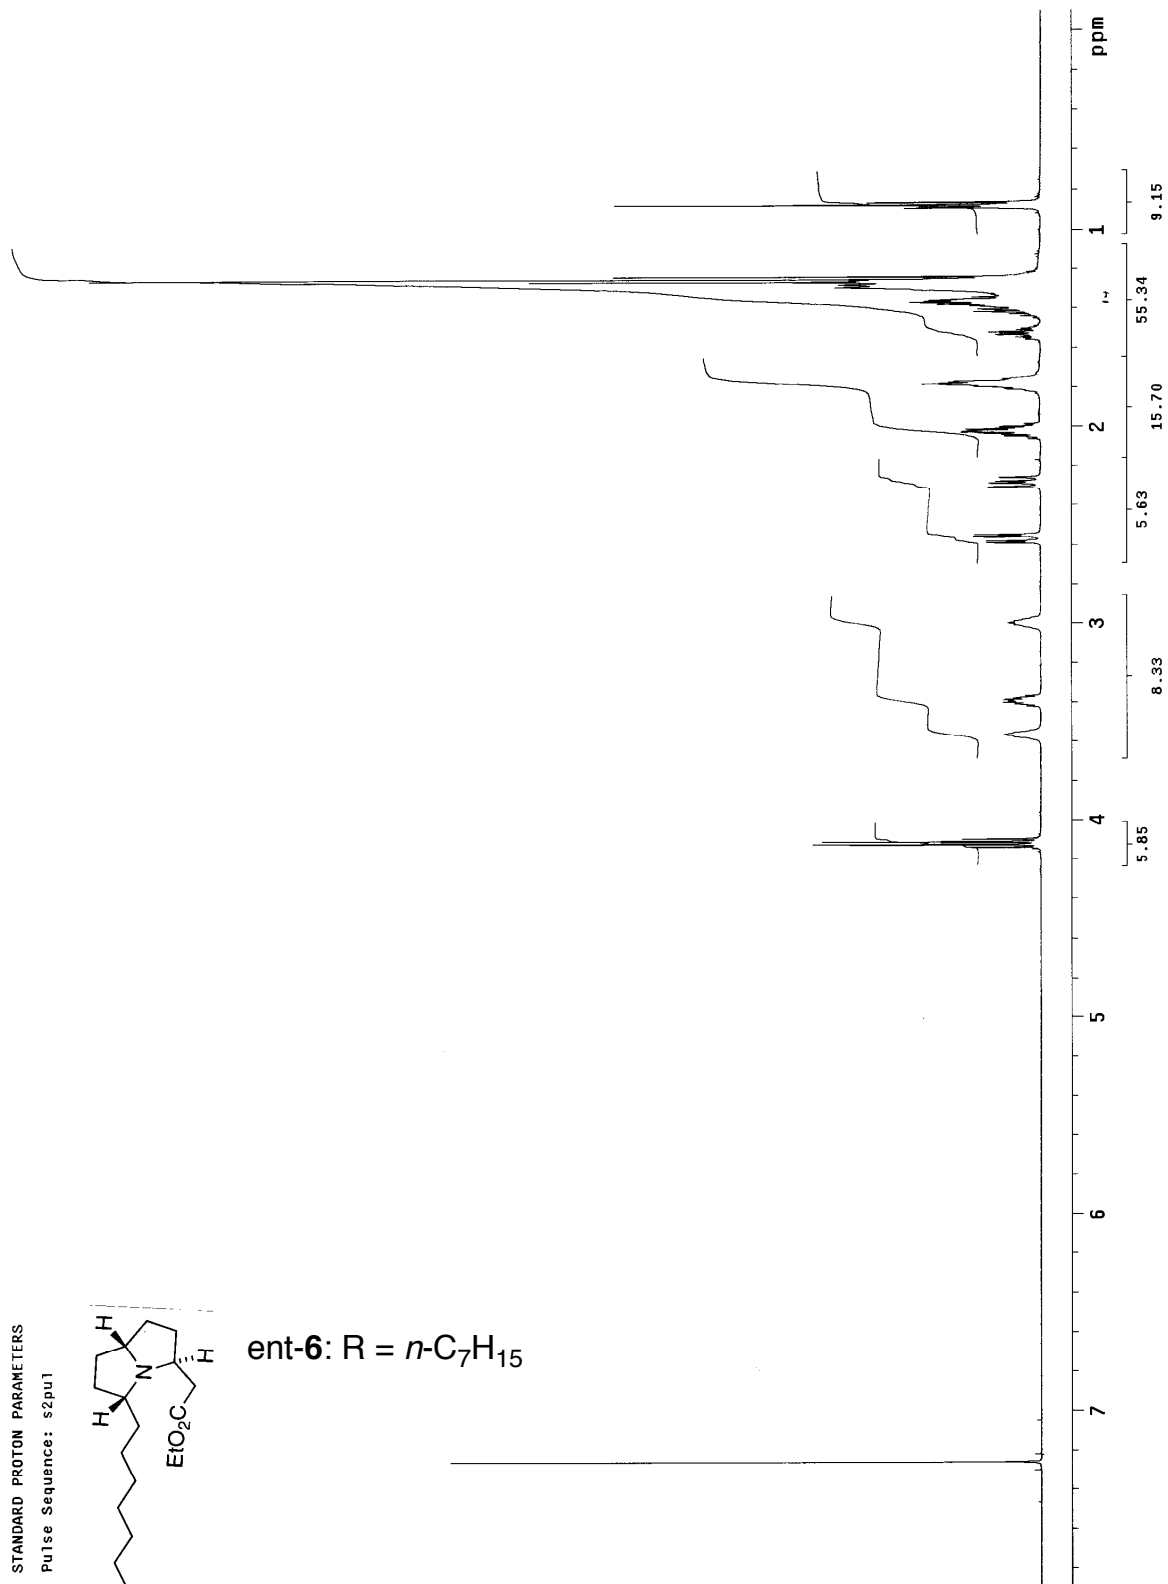

| INDEX | FREQUENCY | PPM       | HEIGHT |
|-------|-----------|-----------|--------|
| 1     | 12985.532 | 172.103 S | 7.9    |
| 2     | 5841.541  | 77.421/   | 12.5   |
| 3     | 5824.450  | 77.184x   | 2.3    |
| 4     | 5808.801  | 77.000/   | 11.6   |
| 5     | 5776.840  | 76.563/   | 11.2   |
| 6     | 4954.036  | 65.658 A  | 13.8   |
| 7     | 4814.867  | 63.814 A  | 11.1   |
| 8     | 4530.426  | 60.044 A  | 11.4   |
| 9     | 4087.283  | 54.171 A  | 12.0   |
| 10    | 3285.700  | 43.282 A  | 11.3   |
| 11    | 2444.117  | 32.383 A  | 10.4   |
| 12    | 2400.169  | 31.811 A  | 9.1    |
| 13    | 2365.987  | 31.358 A  | 13.6   |
| 14    | 2362.325  | 31.309 A  | 11.7   |
| 15    | 2324.480  | 30.807 A  | 10.1   |
| 16    | 2280.532  | 30.225 A  | 12.9   |
| 17    | 2253.675  | 29.869 A  | 14.2   |
| 18    | 2208.507  | 29.270 A  | 14.1   |
| 19    | 2135.260  | 28.300 A  | 12.1   |
| 20    | 1710.429  | 22.688 A  | 11.8   |
| 21    | 1076.846  | 14.272 B  | 13.3   |
| 22    | 1065.859  | 14.126 B  | 13.8   |

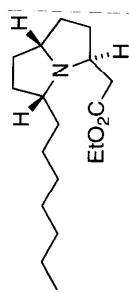

ent-6: R = *n*-C<sub>7</sub>H<sub>15</sub>

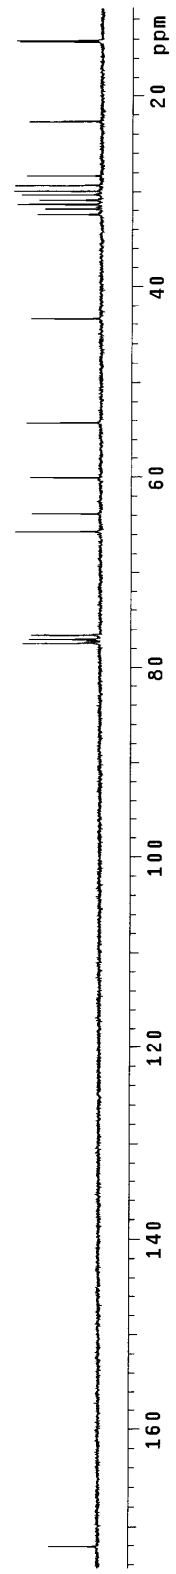



ent-6: R = *n*-C<sub>7</sub>H<sub>15</sub>

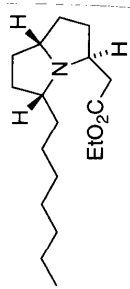

CH3 carbons

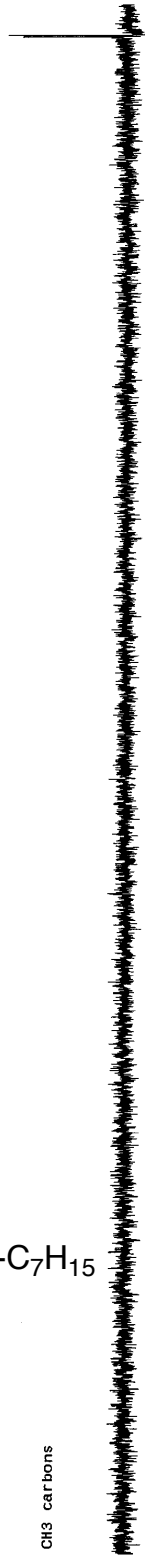

CH2 carbons

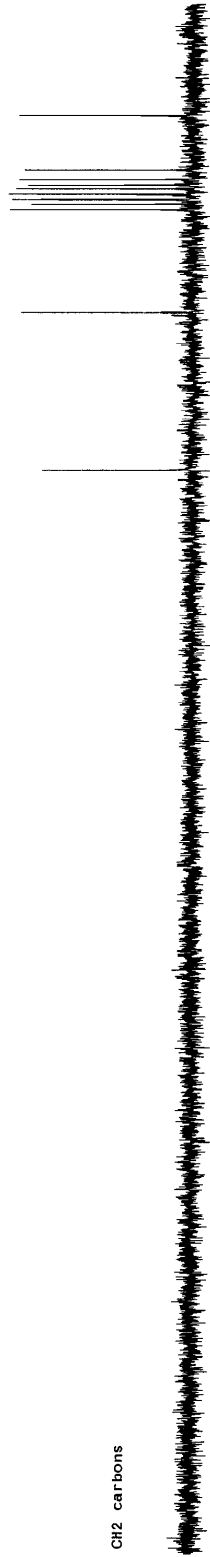

CH carbons

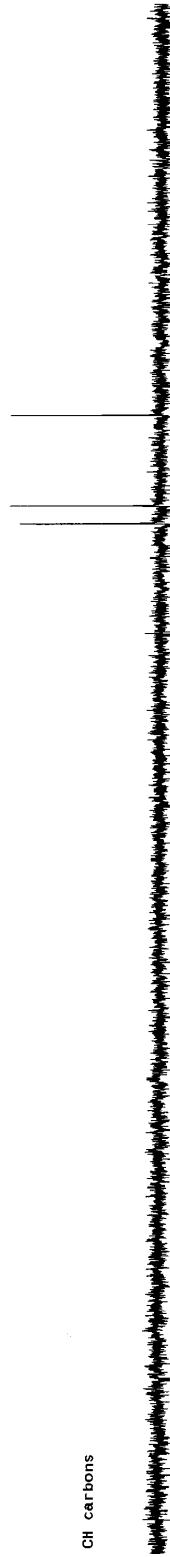

all protonated carbons

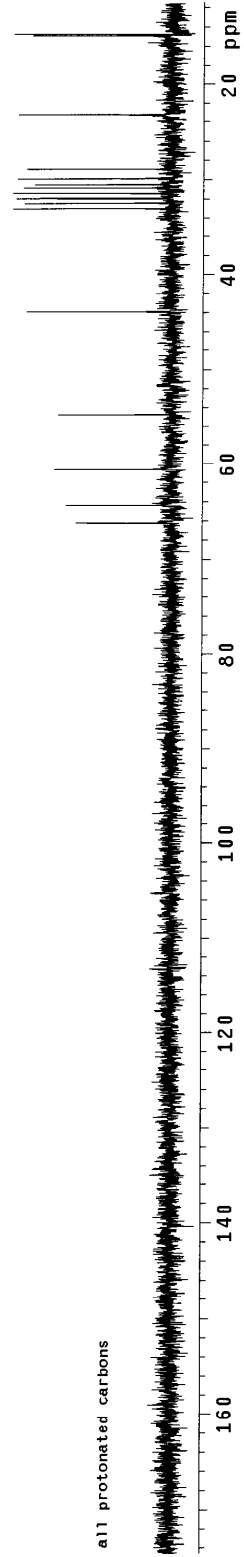

STANDARD 1H OBSERVE

Pulse Sequence: s2pu1

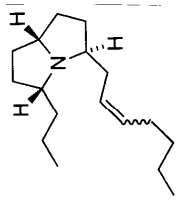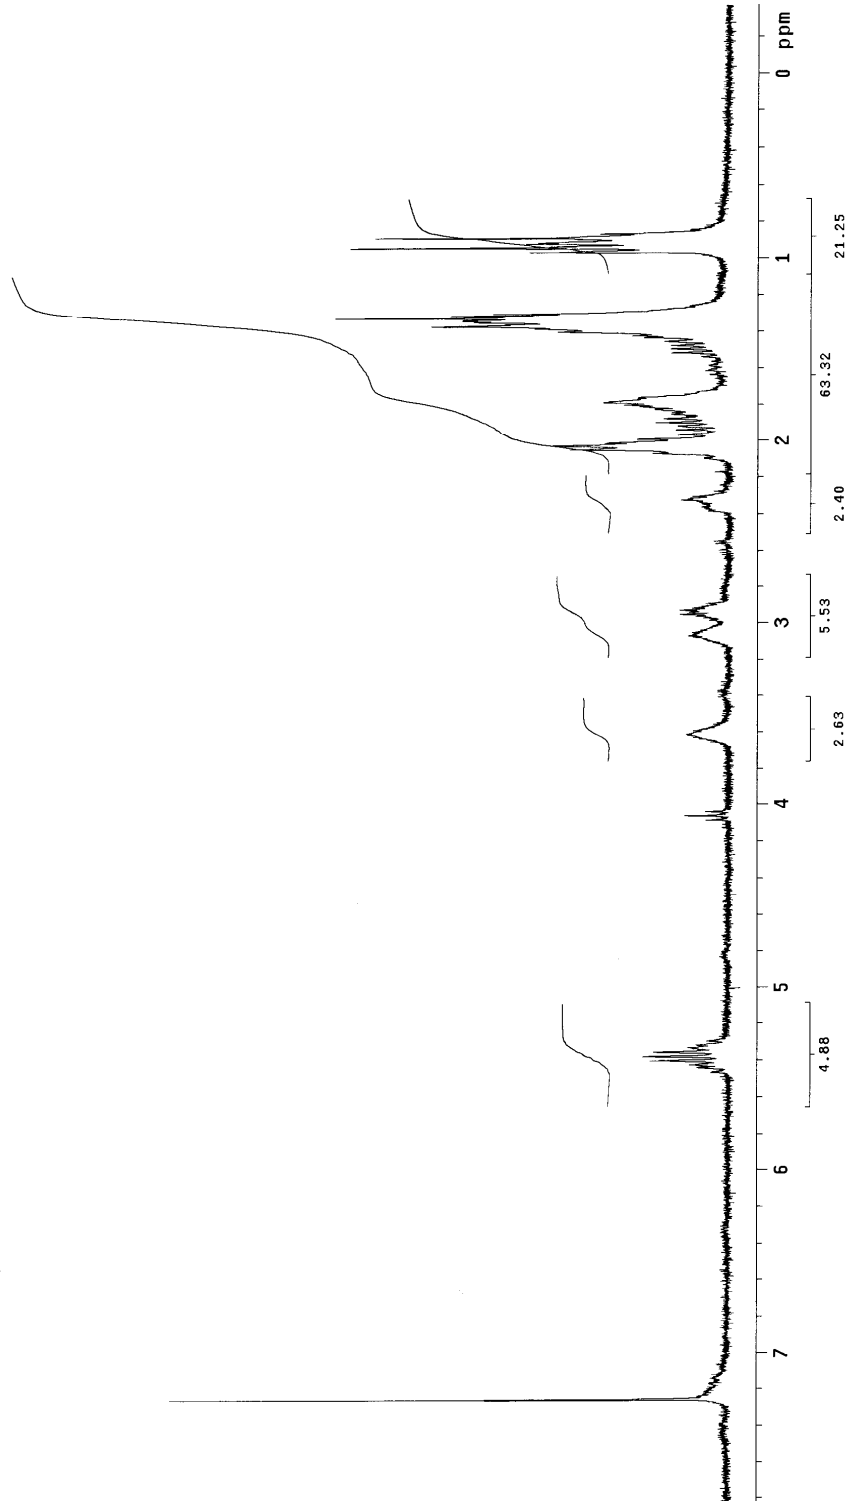

STANDARD PROTON PARAMETERS

Pulse Sequence: s2pu1

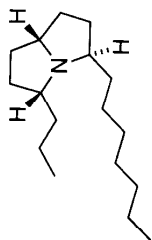ent-7: R = *n*-Pr, R' = *n*-C<sub>7</sub>H<sub>15</sub>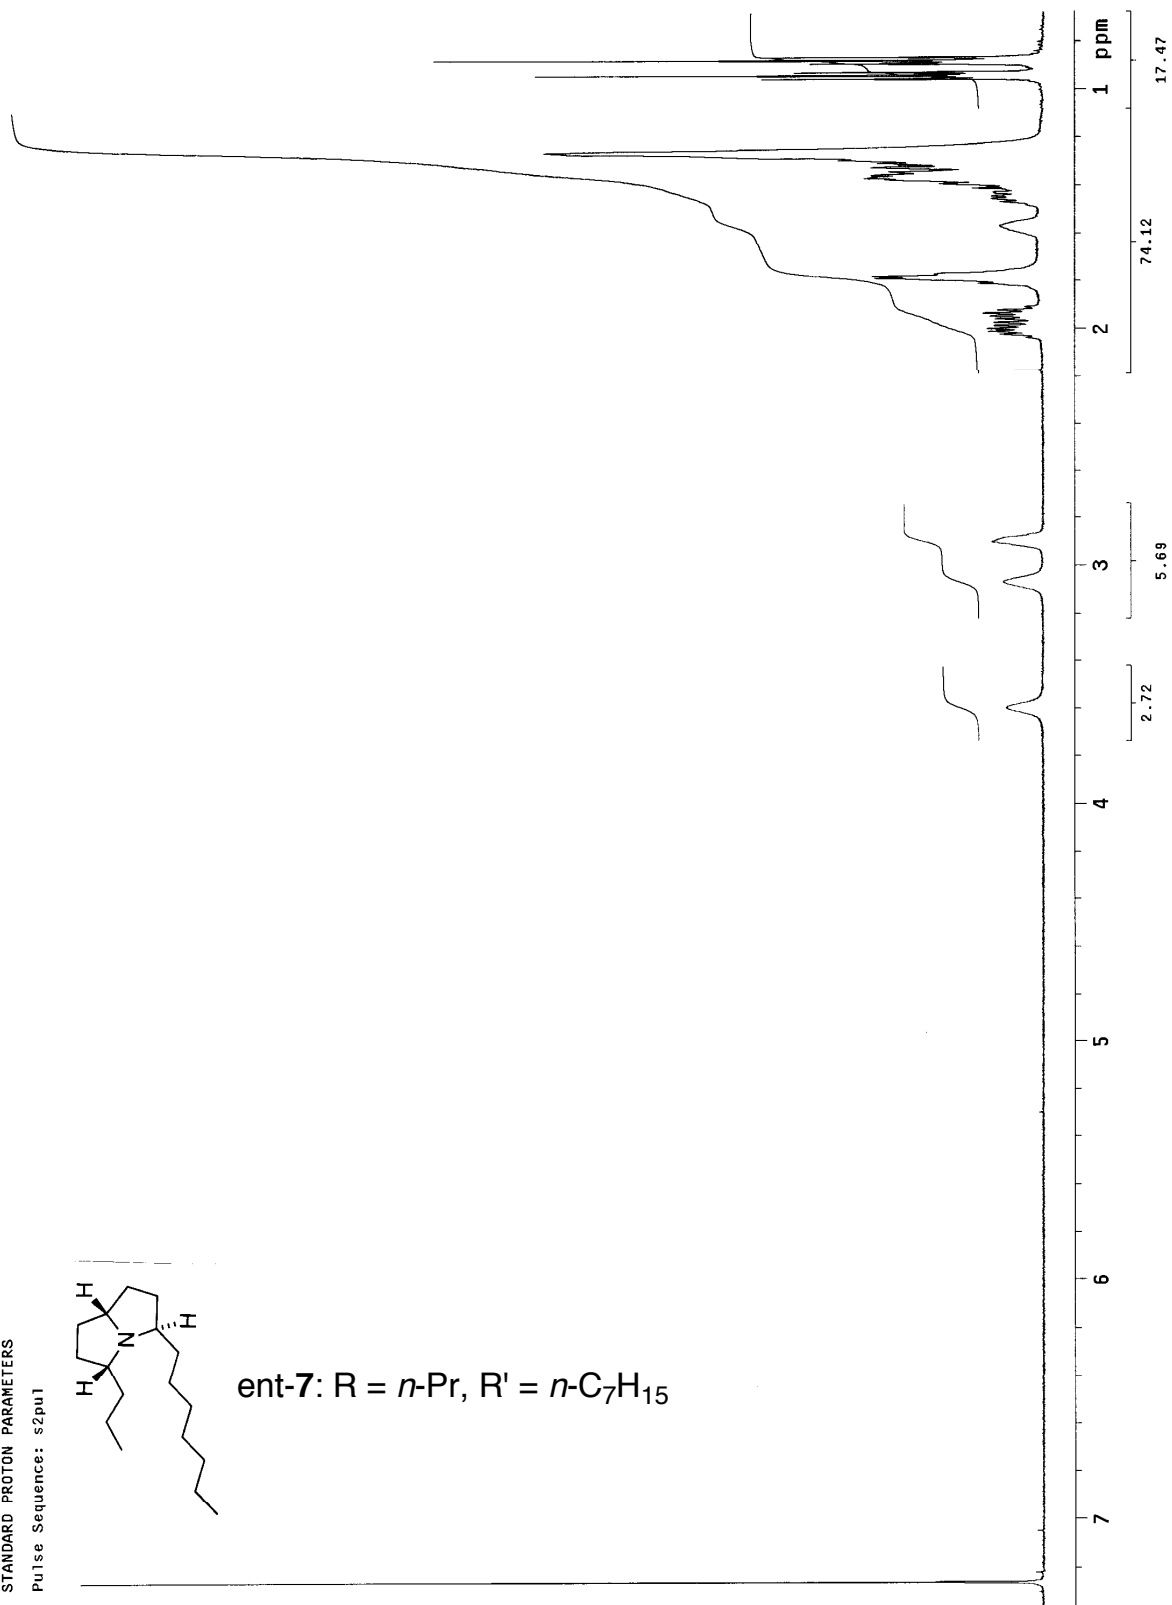



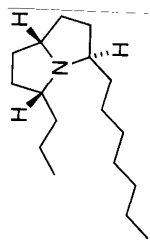

ent-7: R = *n*-Pr,  
R' = *n*-C<sub>7</sub>H<sub>15</sub>

CH<sub>3</sub> carbons

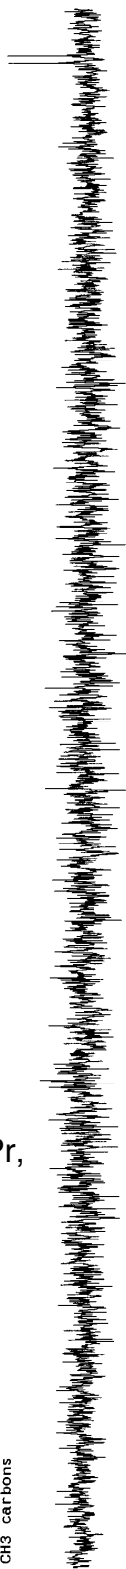

CH<sub>2</sub> carbons

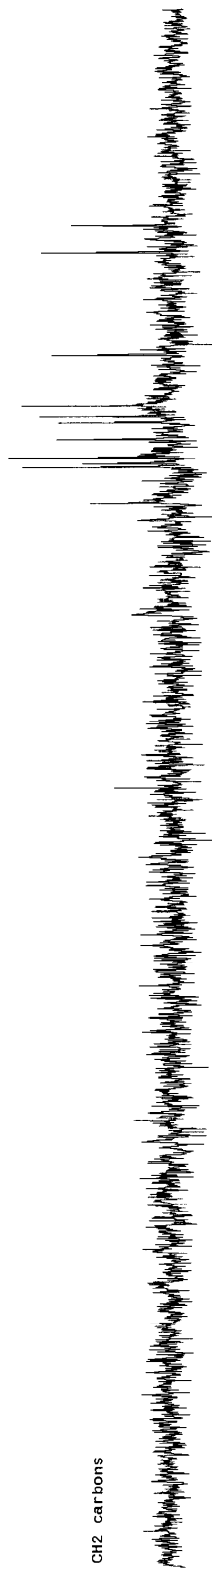

CH carbons

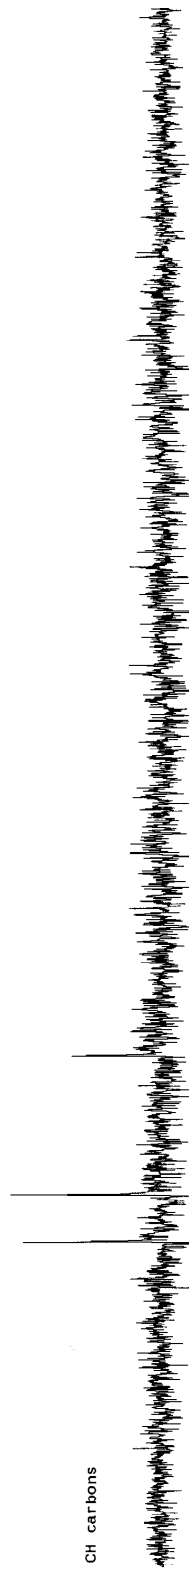

all protonated carbons

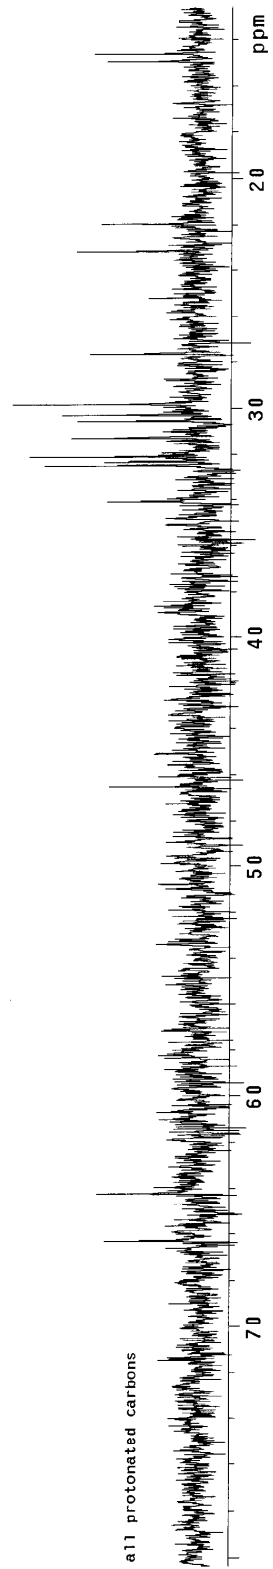

STANDARD 1H OBSERVE

Pulse Sequence: s2pu1

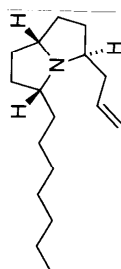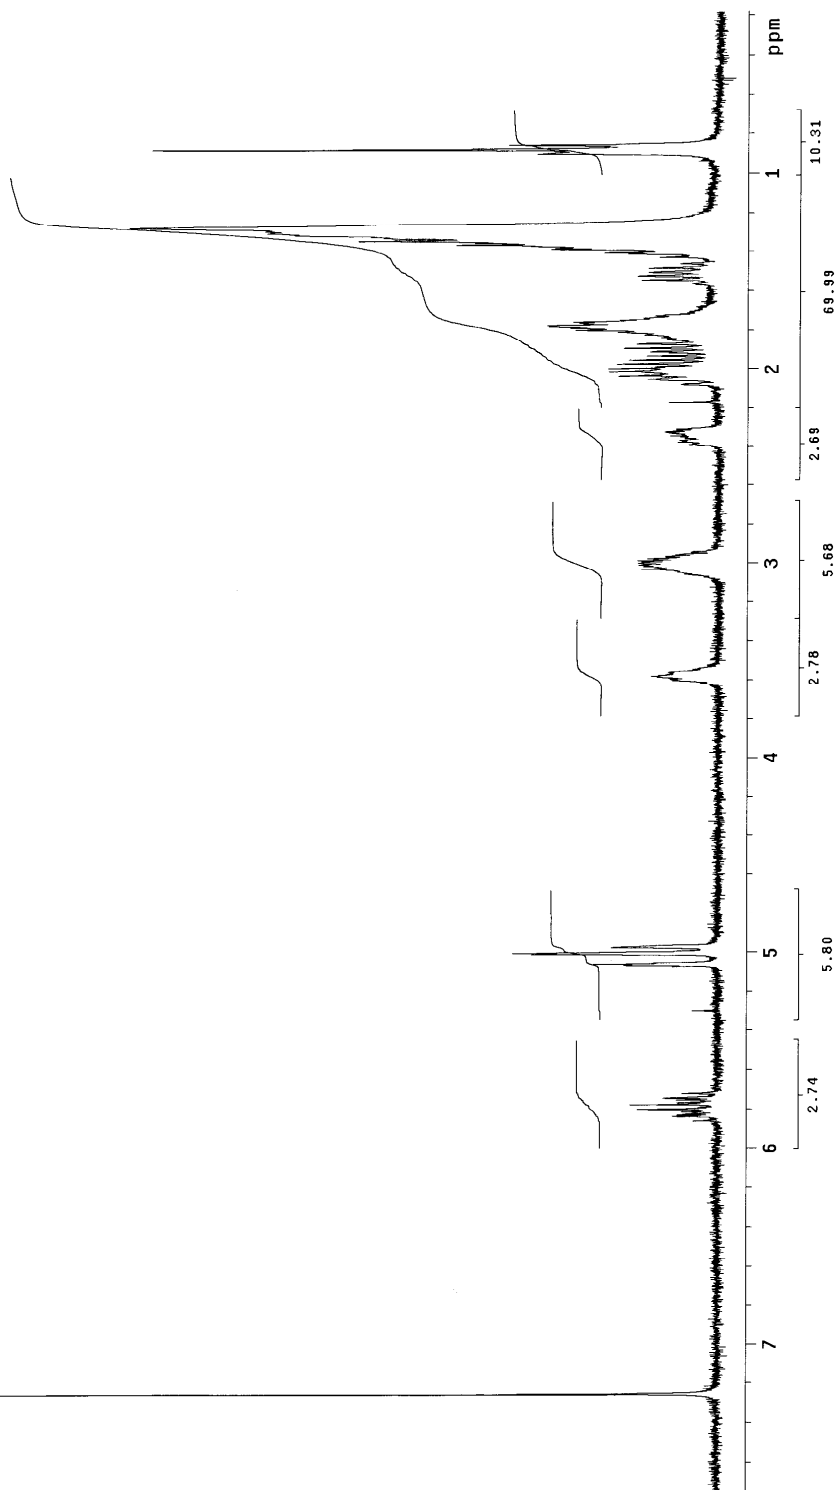

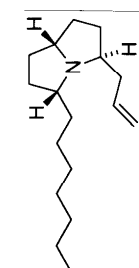

| INDEX | FREQUENCY | PPM     | HEIGHT |
|-------|-----------|---------|--------|
| 1     | 10302.262 | 136.541 | 14.0   |
| 2     | 8737.225  | 115.799 | 12.2   |
| 3     | 5841.541  | 77.421  | 37.3   |
| 4     | 5809.800  | 77.000  | 38.8   |
| 5     | 5778.060  | 76.579  | 37.6   |
| 6     | 4977.230  | 65.966  | 12.7   |
| 7     | 4831.958  | 64.040  | 17.0   |
| 8     | 4310.666  | 57.132  | 15.2   |
| 9     | 3246.167  | 43.023  | 14.6   |
| 10    | 2406.272  | 31.891  | 17.5   |
| 11    | 2380.636  | 31.552  | 14.9   |
| 12    | 2369.649  | 31.406  | 17.4   |
| 13    | 2335.467  | 30.953  | 12.1   |
| 14    | 2279.312  | 30.209  | 13.3   |
| 15    | 2262.221  | 29.982  | 17.2   |
| 16    | 2214.610  | 28.351  | 12.4   |
| 17    | 2143.805  | 28.413  | 17.4   |
| 18    | 1716.533  | 22.750  | 12.5   |
| 19    | 1071.962  | 14.207  | 14.7   |

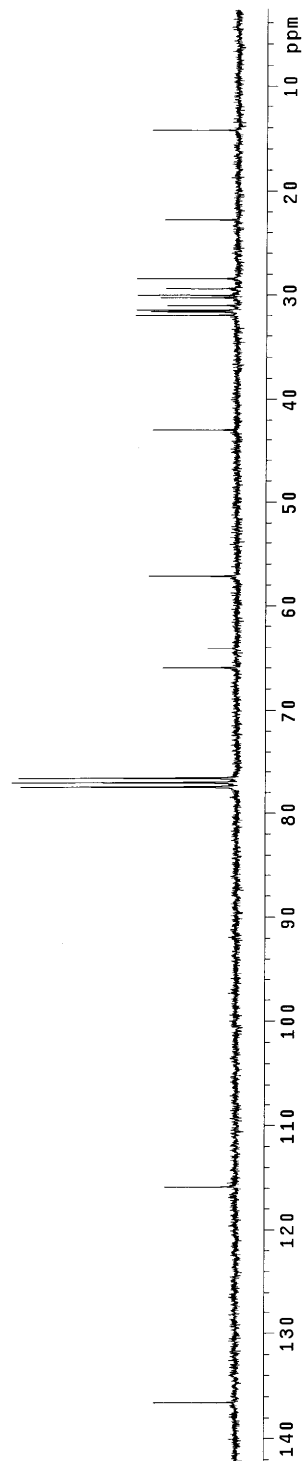

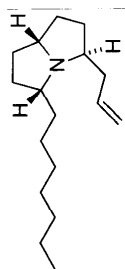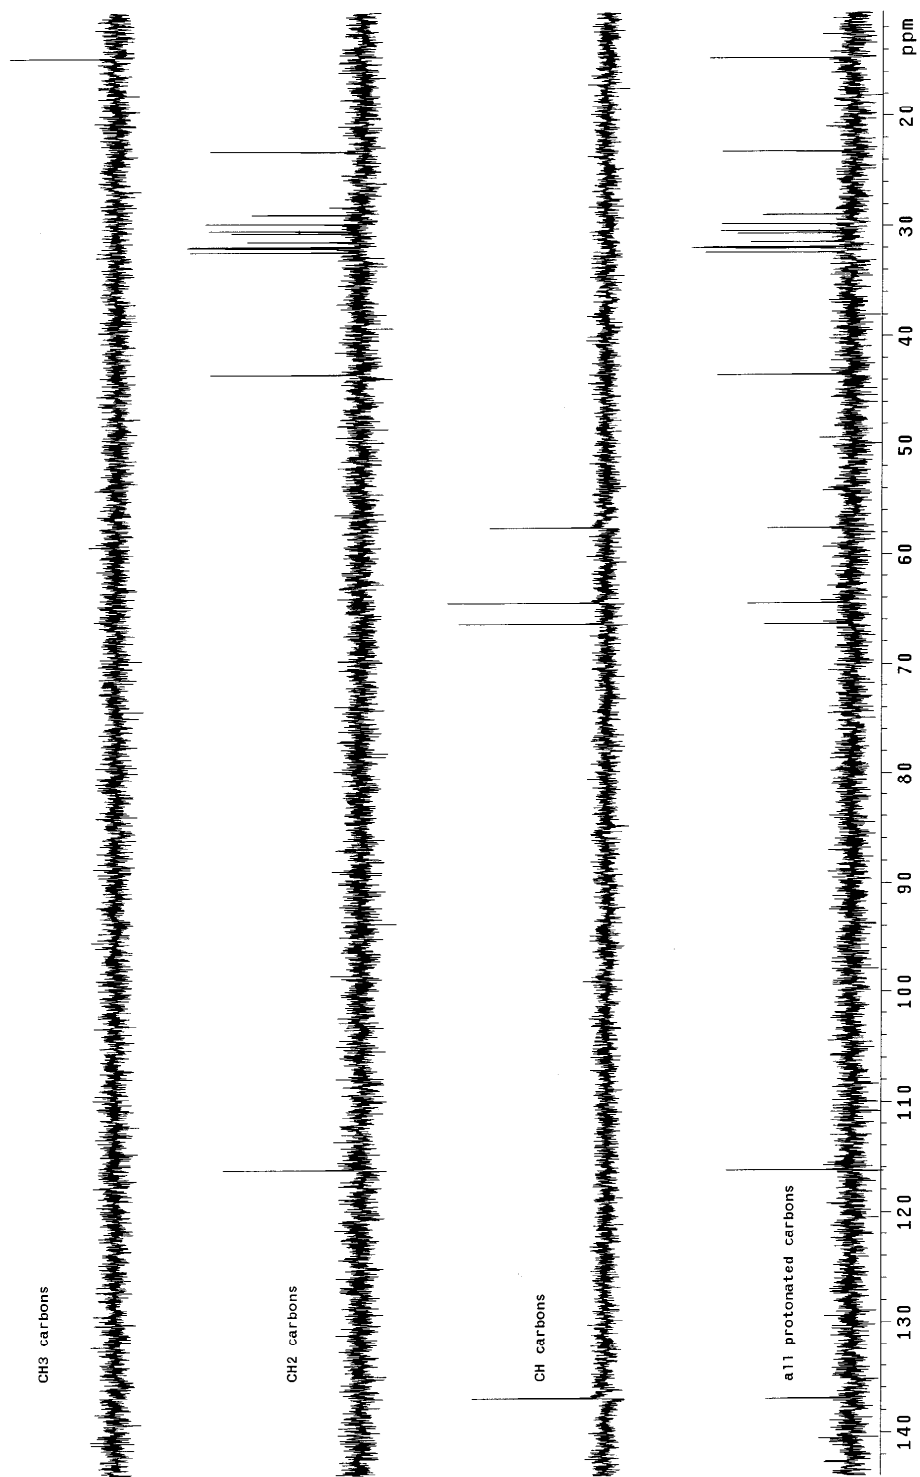



STANDARD 1H OBSERVE

Pulse Sequence: s2pu1

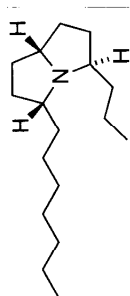

ent-7: R = *n*-C<sub>7</sub>H<sub>15</sub>, R' = *n*-Pr

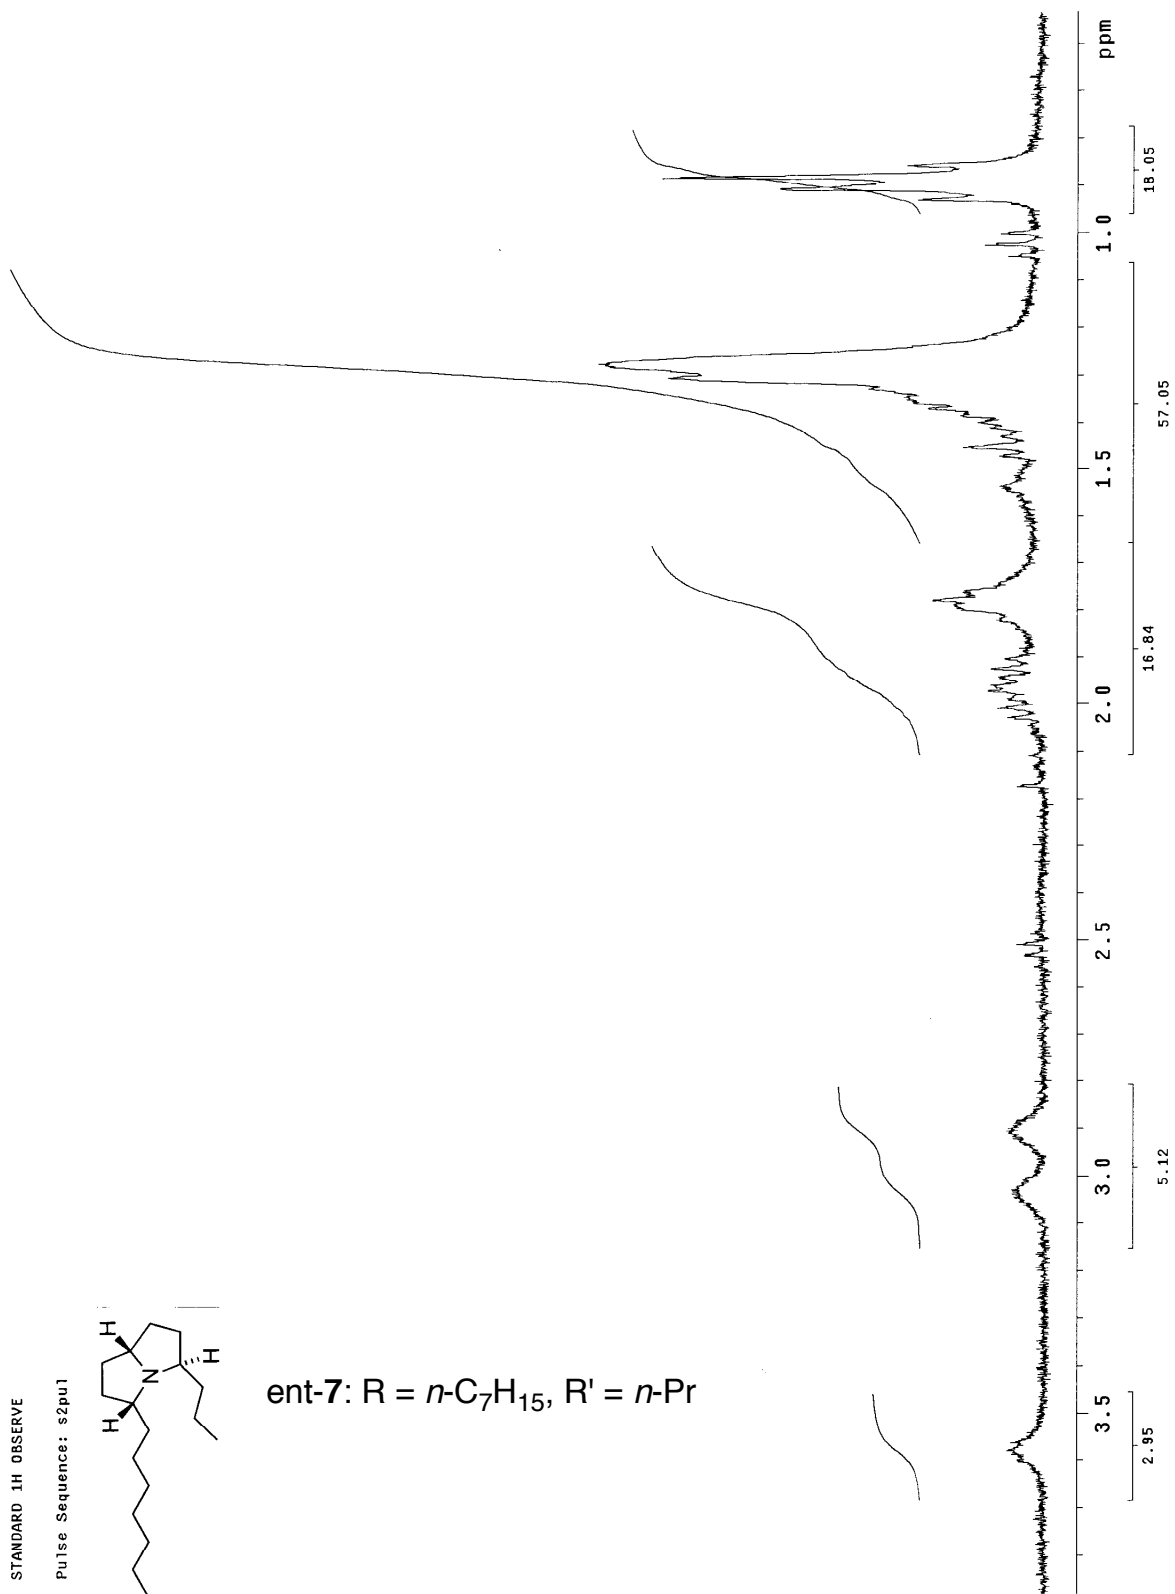

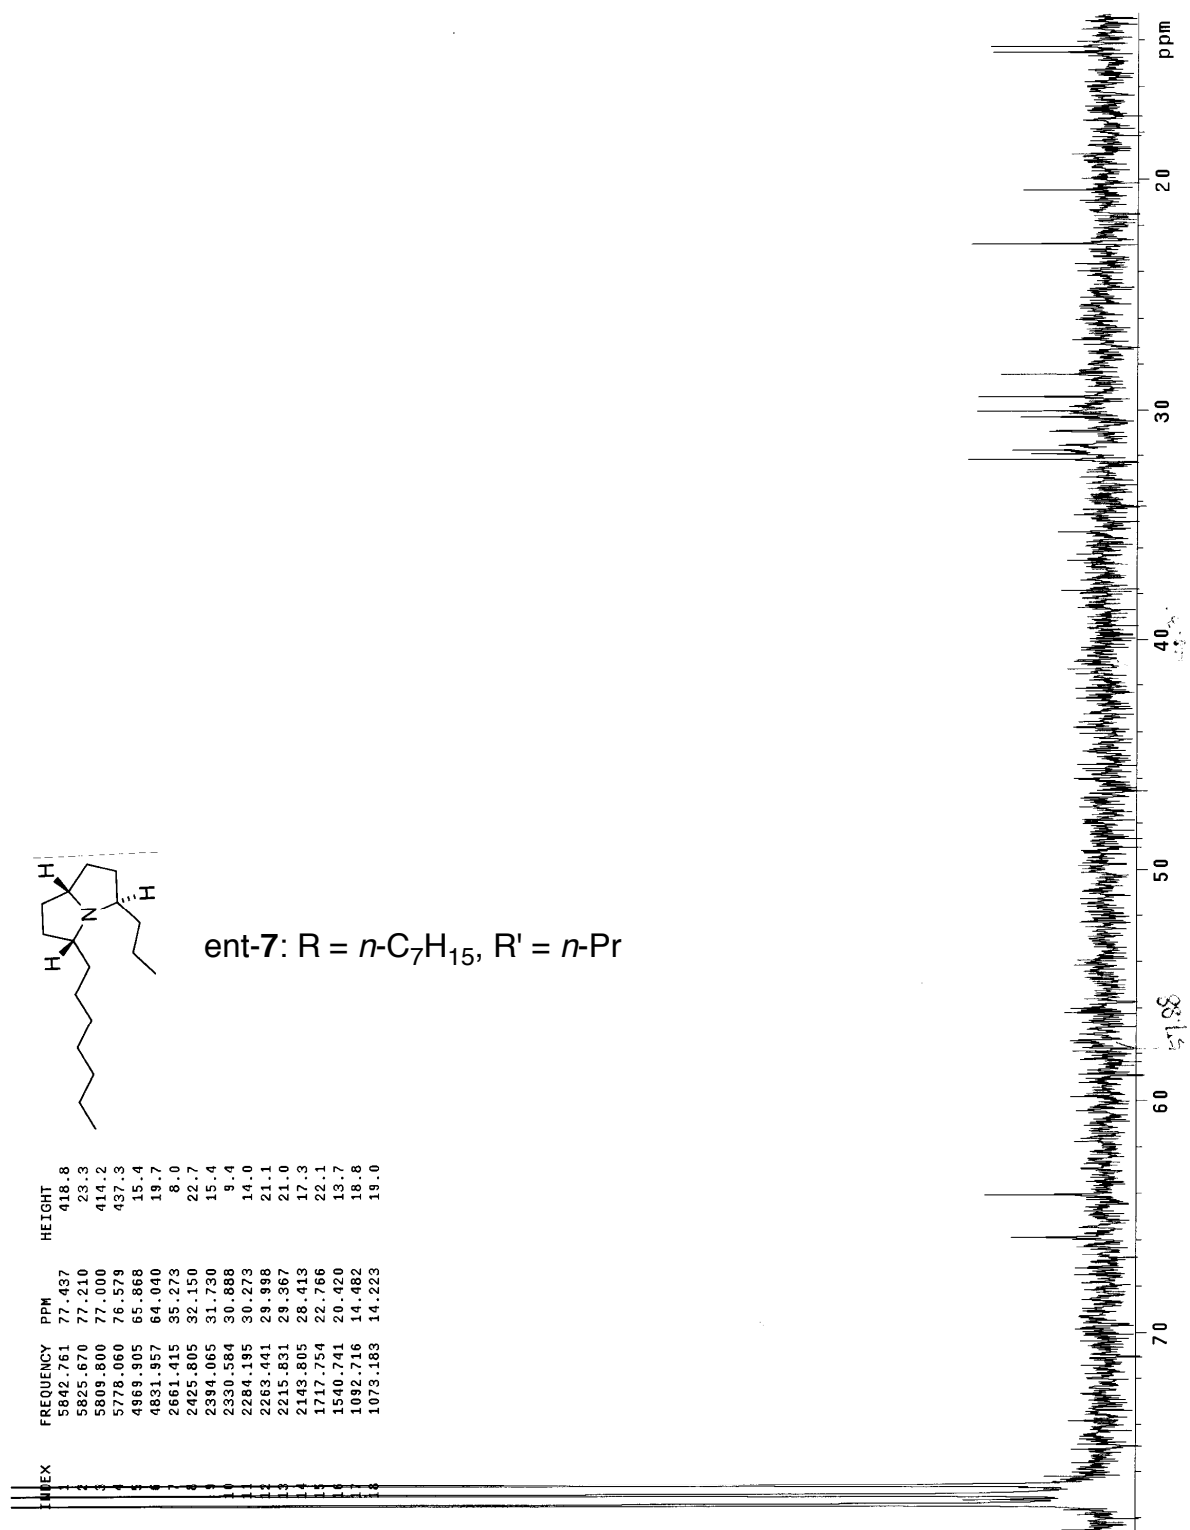

ent-7: R =  $n\text{-C}_7\text{H}_{15}$ ,  
R' =  $n\text{-Pr}$

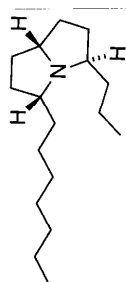

CH3 carbons

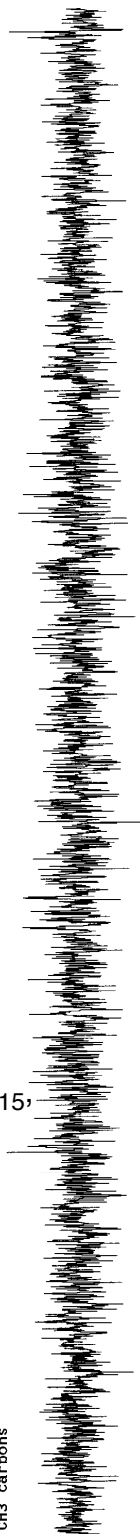

CH2 carbons

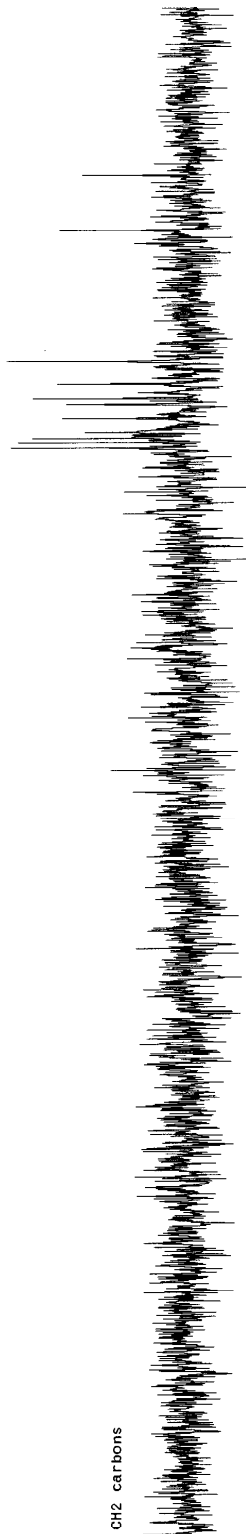

CH carbons

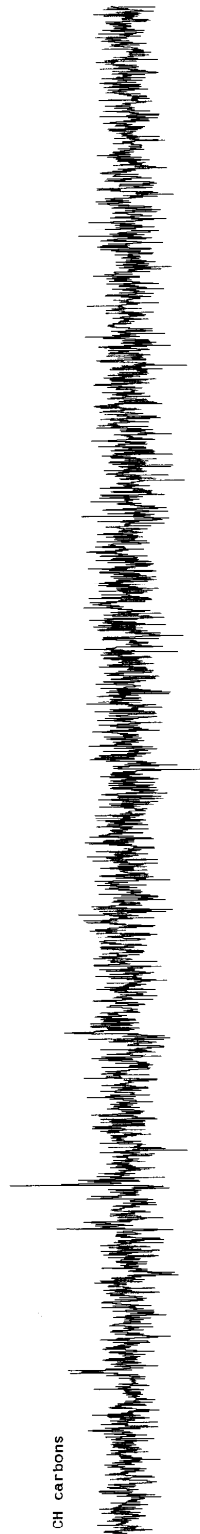

all protonated carbons

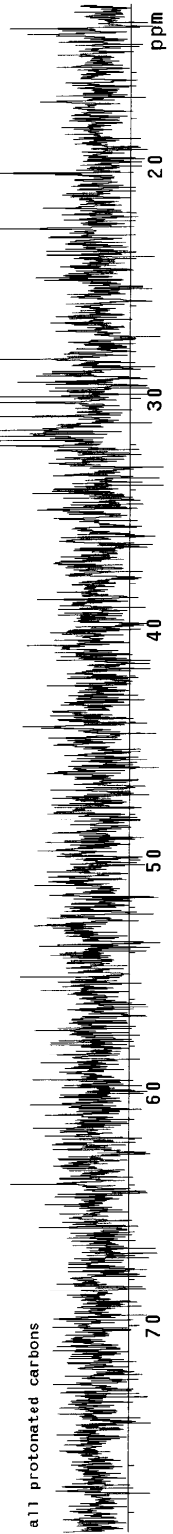

STANDARD 1H OBSERVE

Pulse Sequence: s2pu1

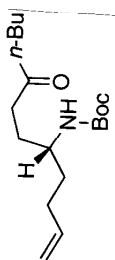**10**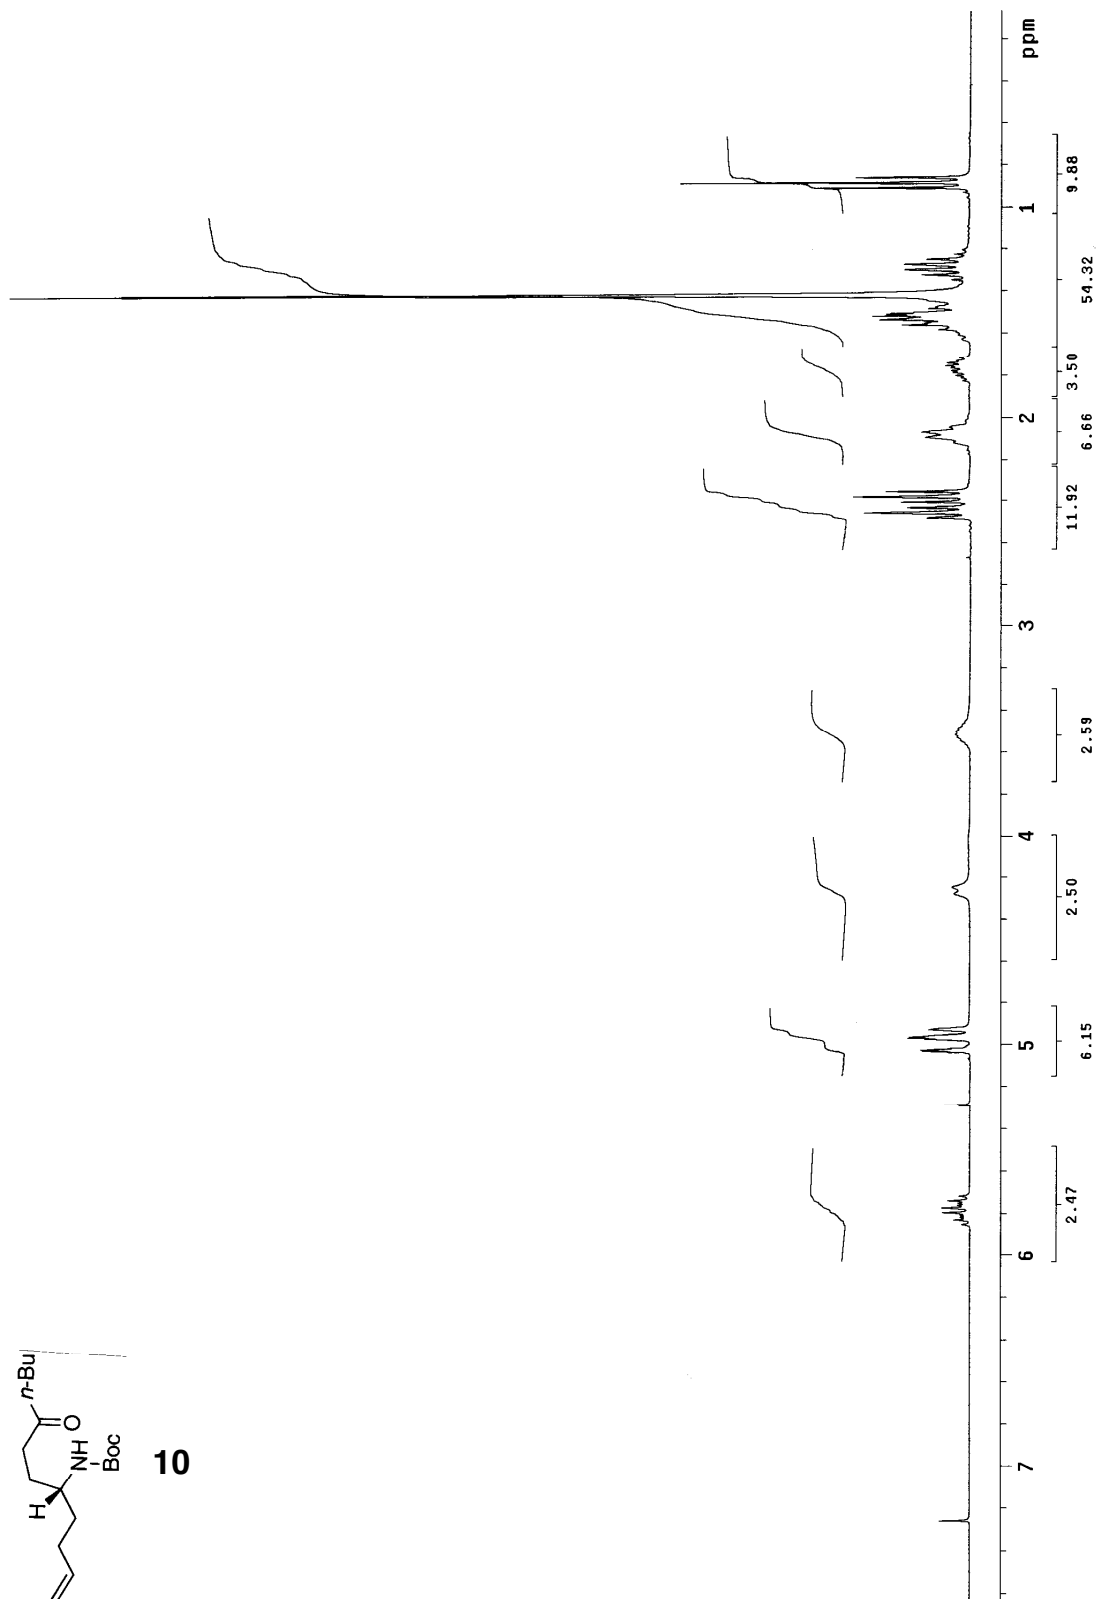

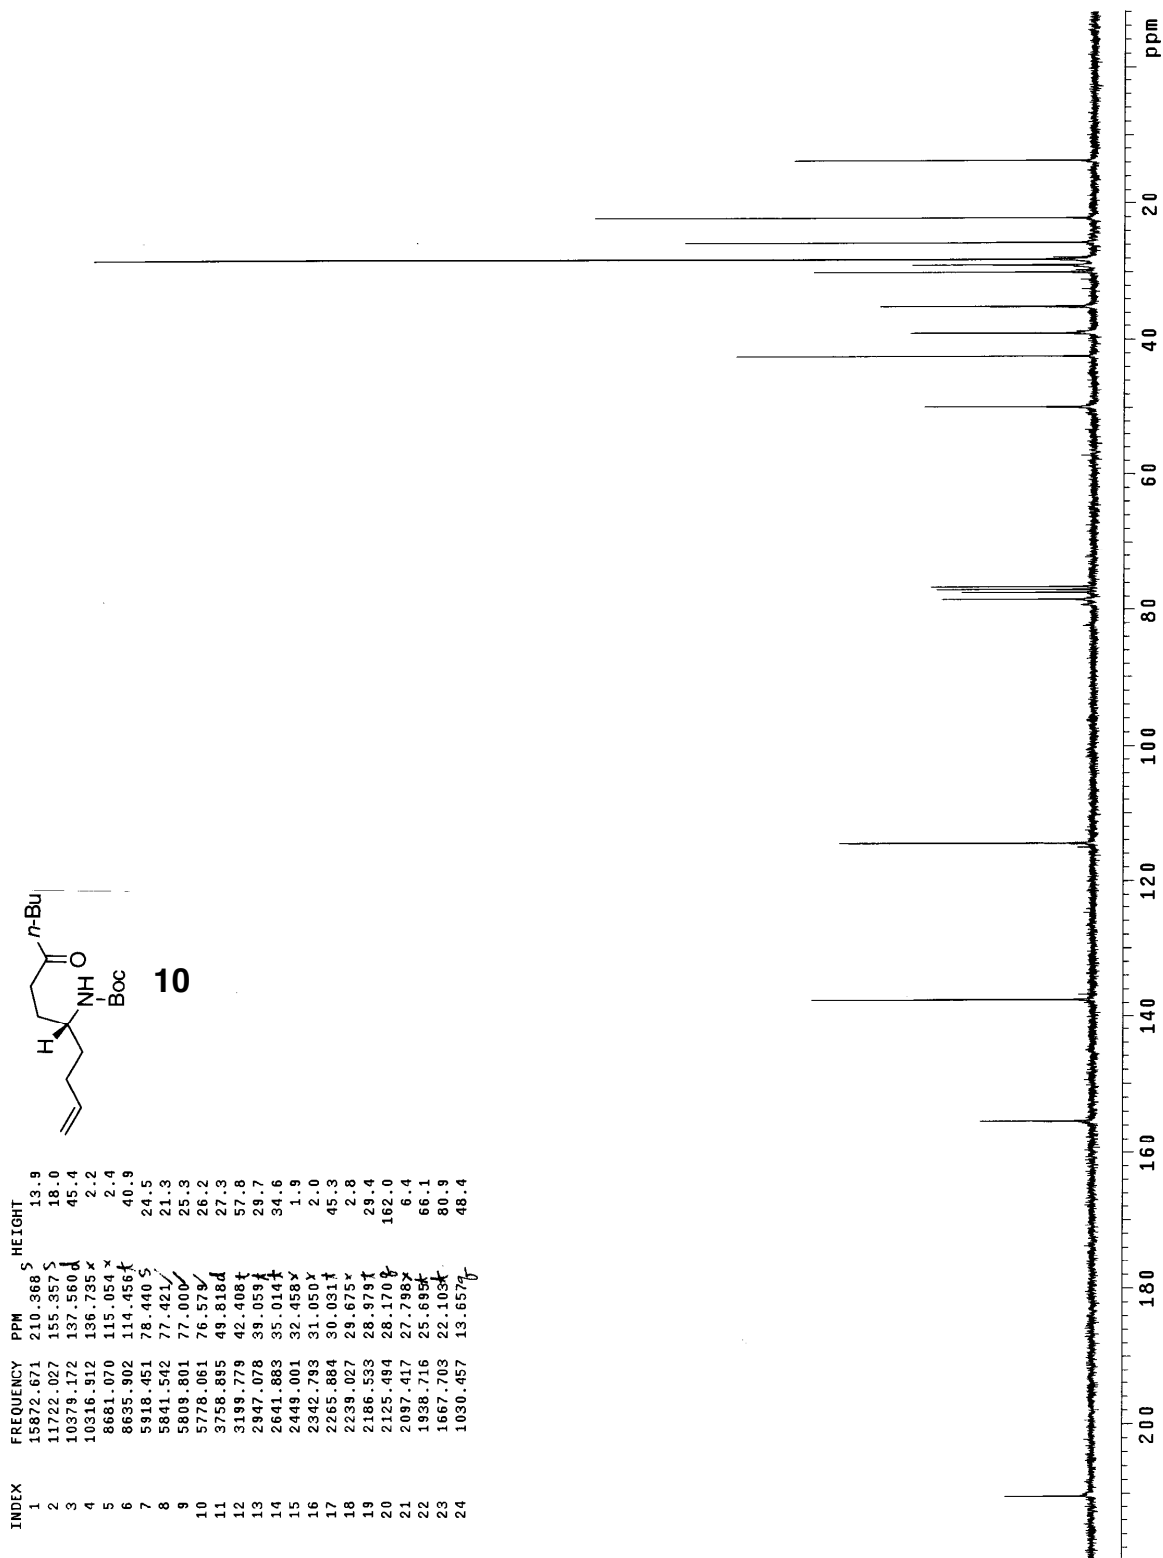

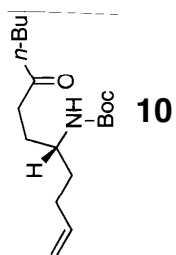

CH3 carbons

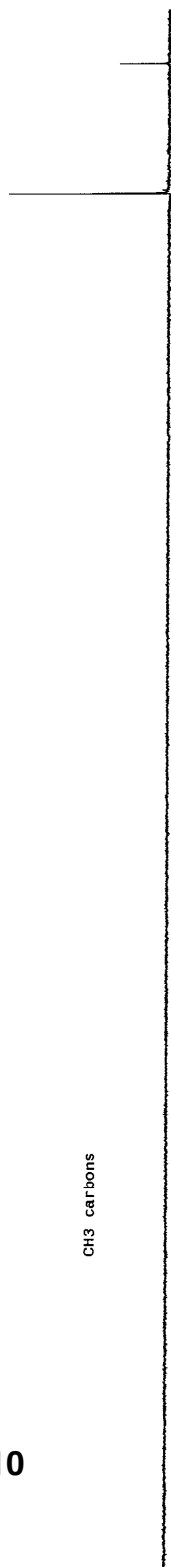

CH2 carbons

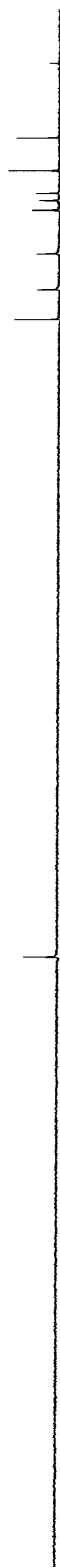

CH carbons

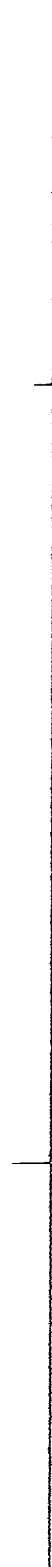

all protonated carbons

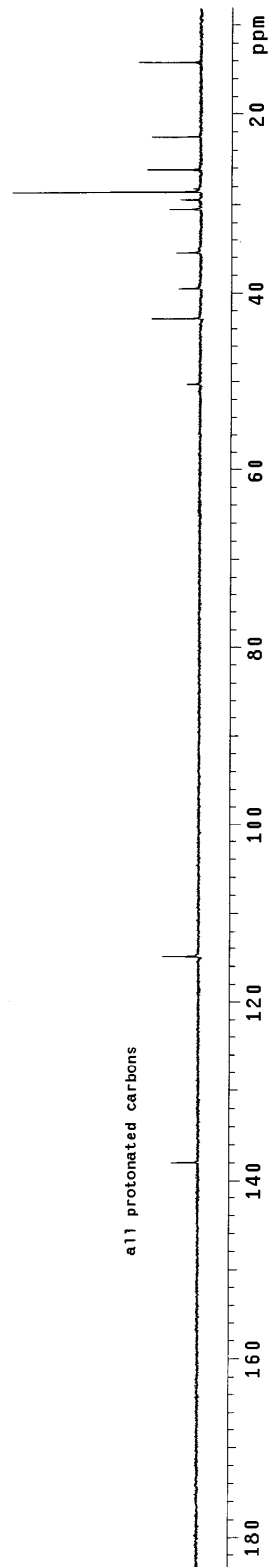

h  
Pulse Sequence: s2pu1

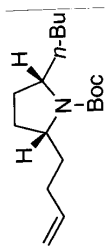

11

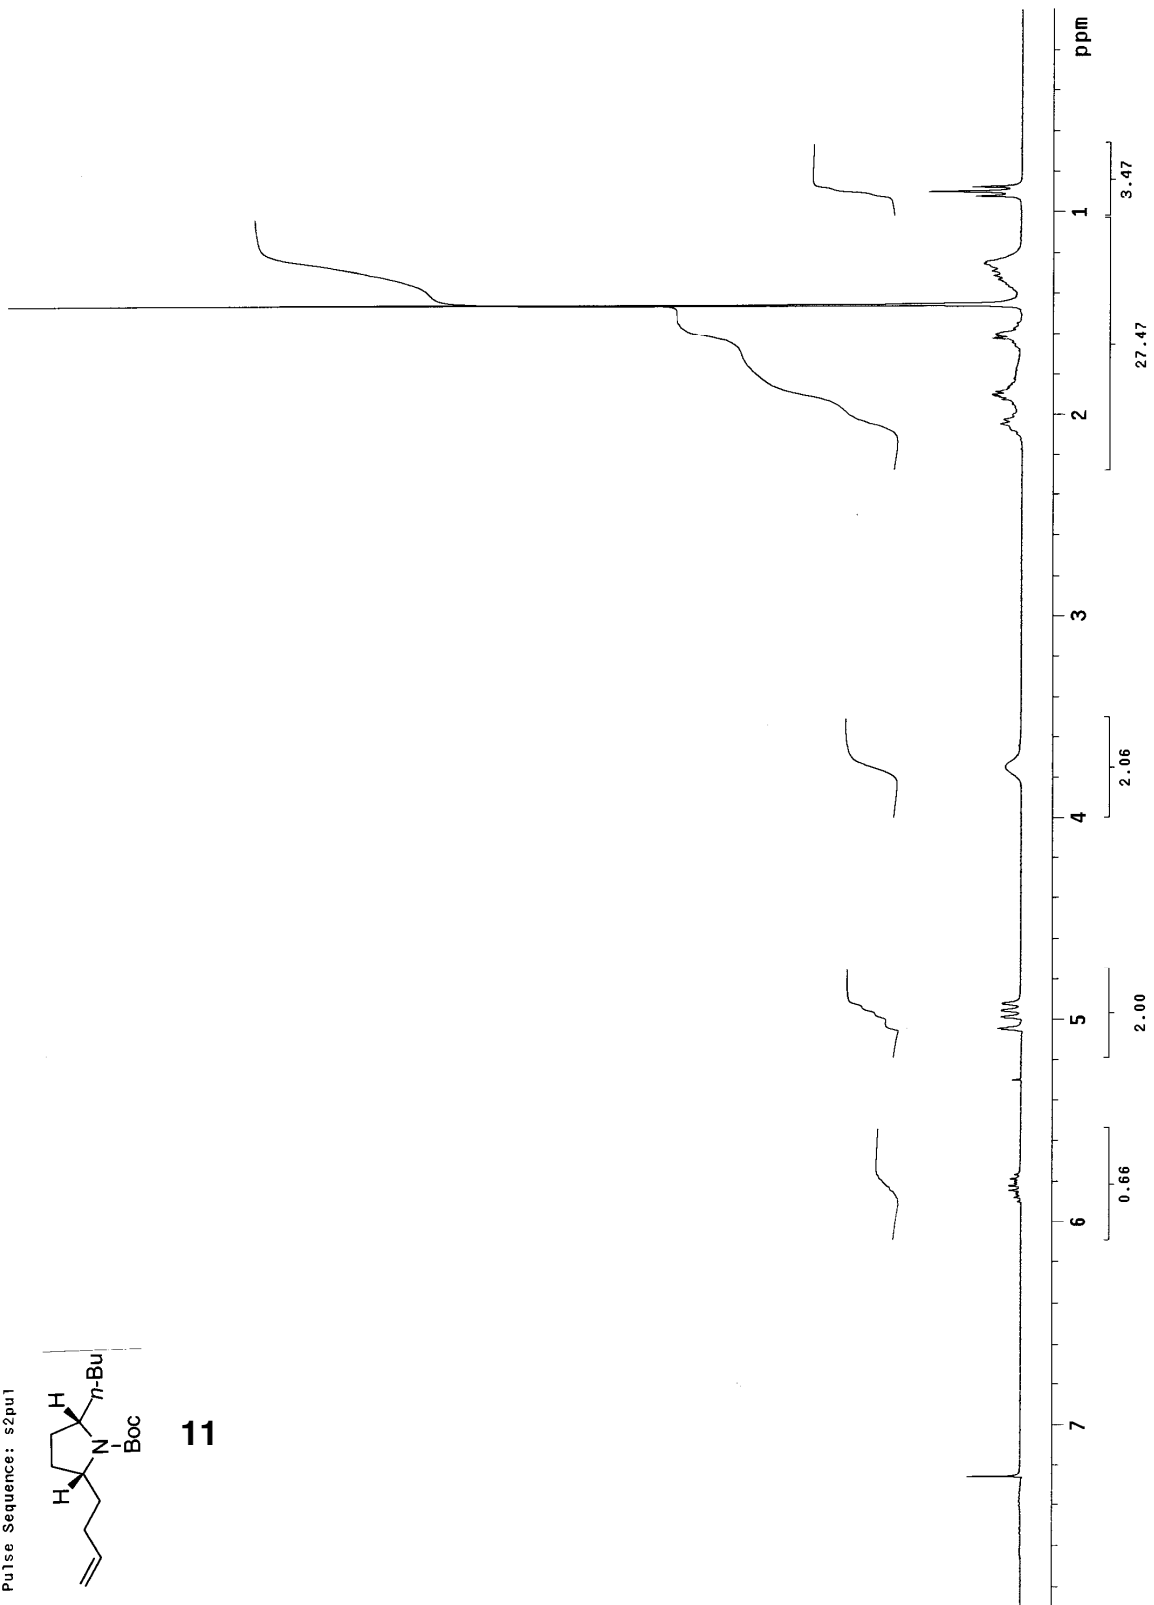

| INDEX | FREQUENCY | PPM      | HEIGHT |
|-------|-----------|----------|--------|
| 1     | 12317.766 | 163.253x | -0.7   |
| 2     | 11667.092 | 154.628s | 10.2   |
| 3     | 11000.547 | 145.795x | -0.7   |
| 4     | 10495.145 | 139.097x | -0.8   |
| 5     | 10475.613 | 138.838x | -0.8   |
| 6     | 10429.223 | 138.223d | 18.4   |
| 7     | 10258.315 | 135.958x | -0.8   |
| 8     | 10170.419 | 134.795x | 0.8    |
| 9     | 9623.510  | 127.545x | 1.4    |
| 10    | 9614.965  | 127.432x | 1.1    |
| 11    | 8853.199  | 117.336x | 0.8    |
| 12    | 8707.927  | 115.410* | -0.8   |
| 13    | 8616.369  | 114.197† | 19.9   |
| 14    | 7964.473  | 105.557x | -0.8   |
| 15    | 7843.616  | 103.955x | 0.7    |
| 16    | 7589.695  | 100.590x | -0.7   |
| 17    | 6534.943  | 86.611^  | -0.7   |
| 18    | 5931.879  | 78.618c  | 15.4   |
| 19    | 5841.541  | 77.421/  | 15.2   |
| 20    | 5809.801  | 77.000/  | 14.4   |
| 21    | 5776.840  | 76.563/  | 13.8   |
| 22    | 5035.828  | 66.742y  | -0.7   |
| 23    | 4779.465  | 63.344z  | -1.0   |
| 24    | 4496.244  | 59.591v  | -0.8   |
| 25    | 4398.582  | 58.296d  | 14.4   |
| 26    | 4361.959  | 57.811d  | 10.7   |
| 27    | 2684.610  | 35.580†  | 7.7    |
| 28    | 2647.987  | 35.095†  | 5.7    |
| 29    | 2319.598  | 30.743†  | 17.2   |
| 30    | 2214.611  | 29.351†  | 4.7    |
| 31    | 2157.234  | 28.591†  | 19.0   |
| 32    | 2149.909  | 28.494q  | 98.1   |
| 33    | 1913.079  | 25.355x  | -0.8   |
| 34    | 1711.650  | 22.685†  | 17.4   |
| 35    | 1515.105  | 20.080x  | -0.8   |
| 36    | 1067.080  | 14.143g  | 27.3   |

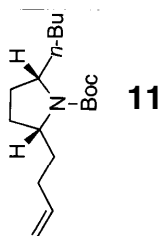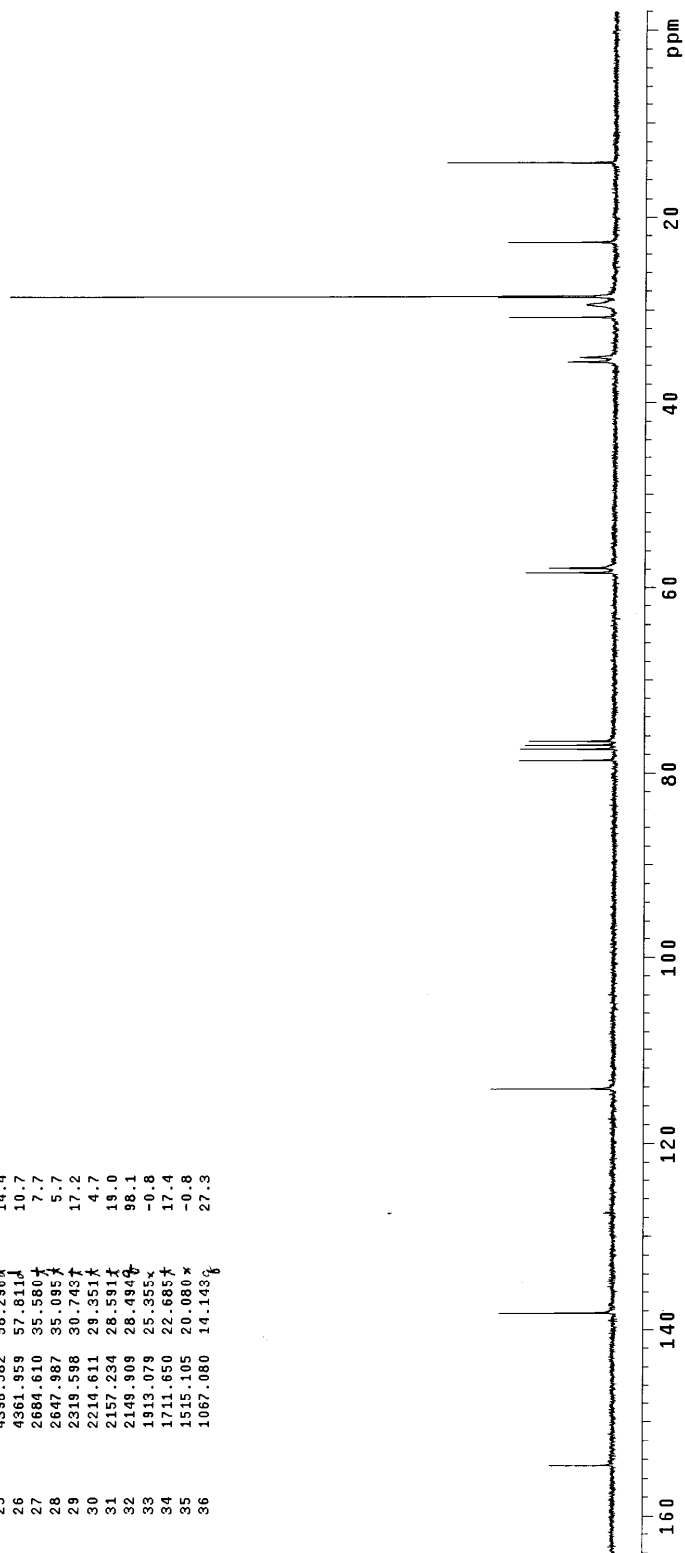



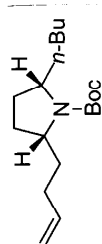**11**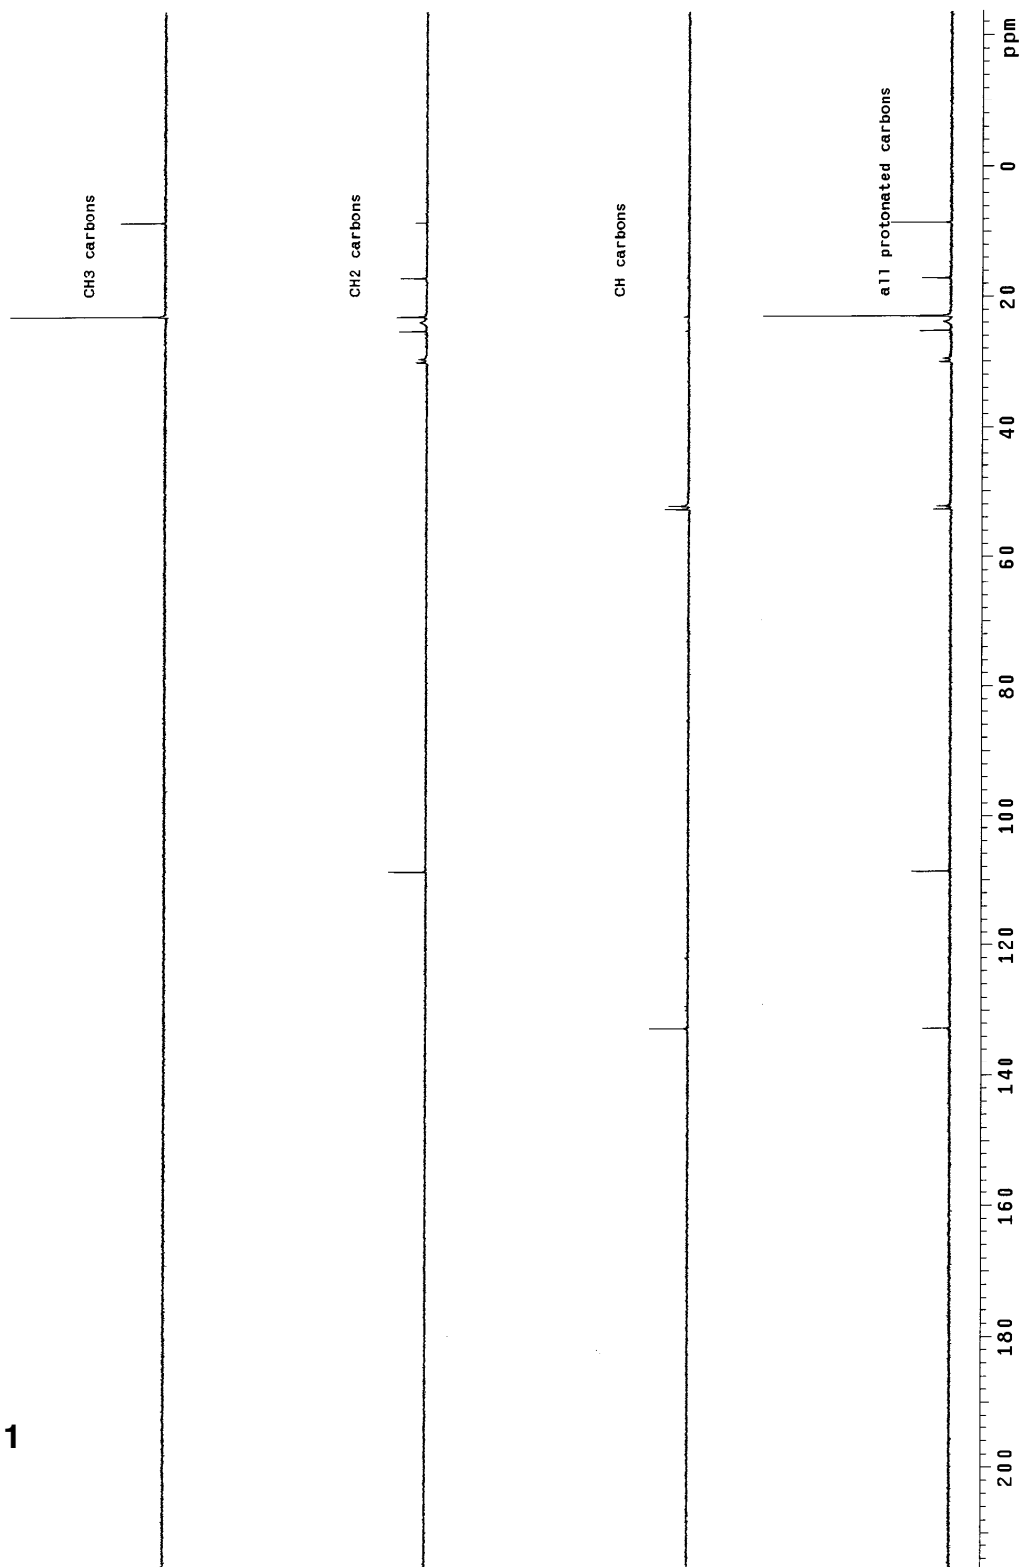

STANDARD PROTON PARAMETERS

Pulse Sequence: s2pu1

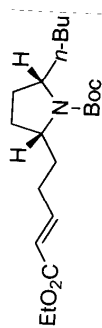**12**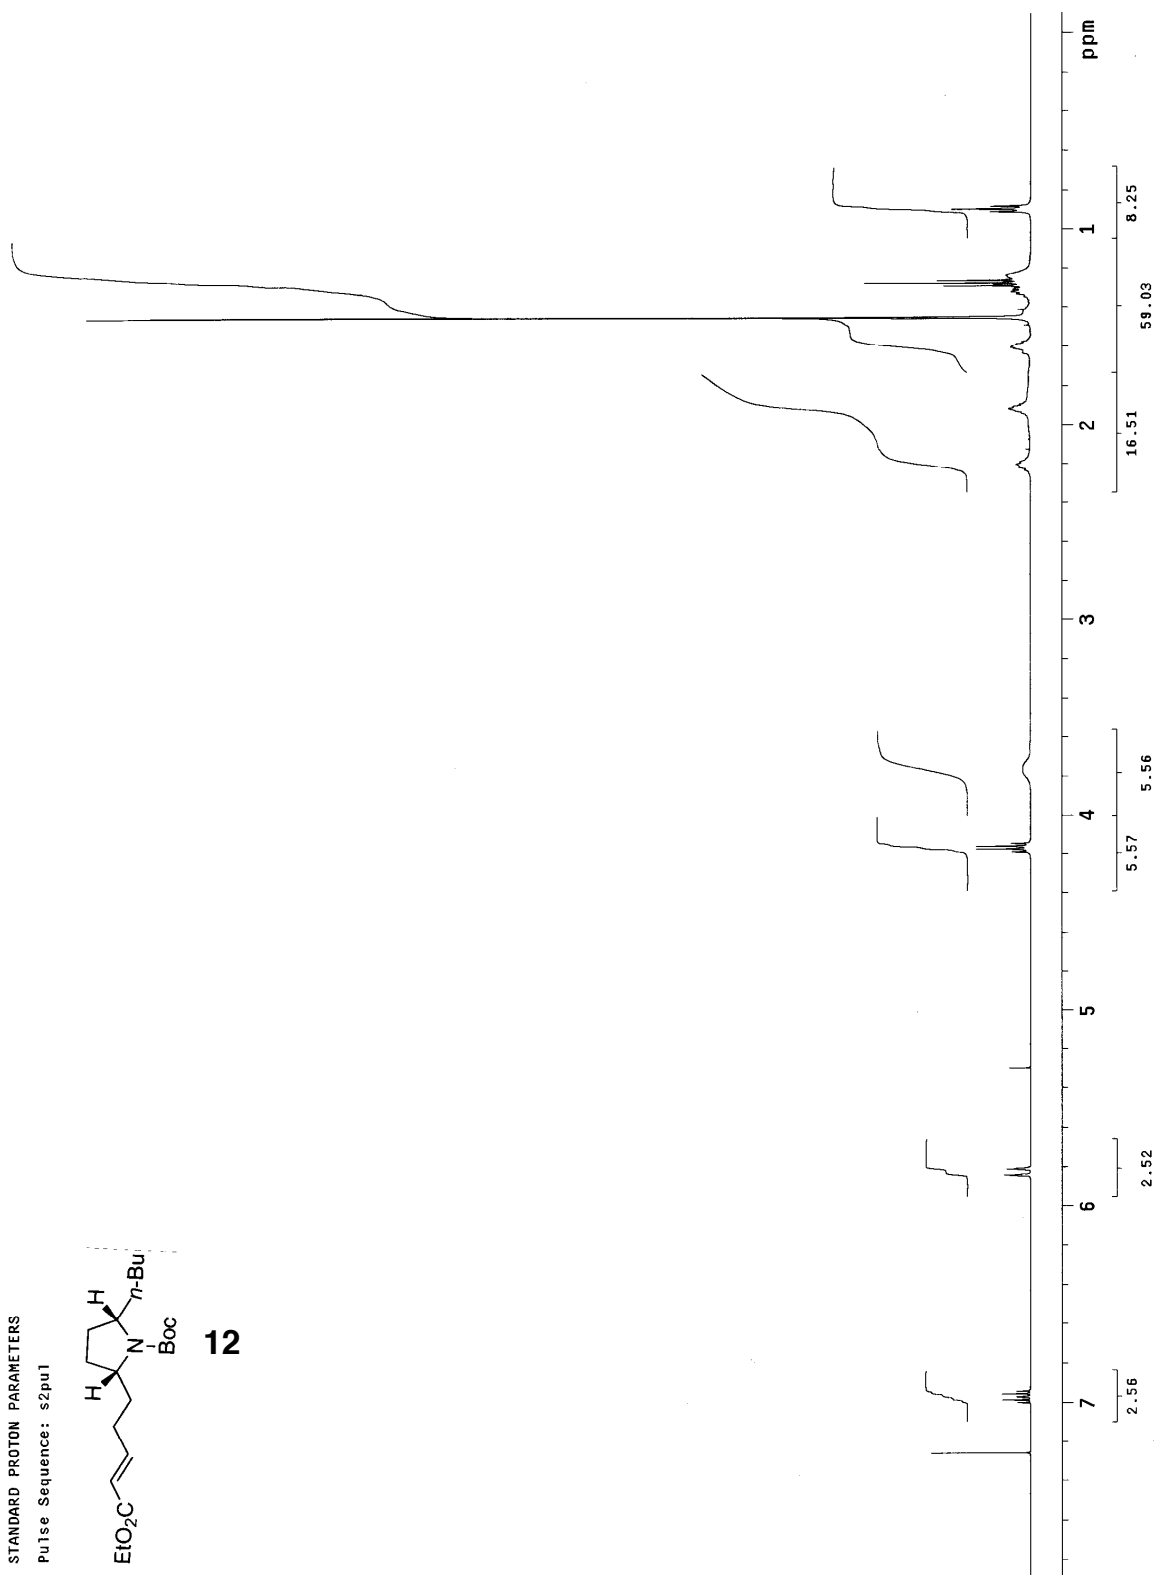

| INDEX | FREQUENCY | PPM     | HEIGHT |
|-------|-----------|---------|--------|
| 1     | 12533.844 | 166.117 | 7.4    |
| 2     | 11660.988 | 154.549 | 4.5    |
| 3     | 11192.210 | 148.336 | 6.9    |
| 4     | 9136.420  | 121.089 | 10.6   |
| 5     | 5941.645  | 78.747  | 14.1   |
| 6     | 5841.541  | 77.421  | 13.0   |
| 7     | 5809.801  | 77.000  | 12.2   |
| 8     | 5776.840  | 76.569  | 11.9   |
| 9     | 4516.988  | 58.866  | 17.6   |
| 10    | 4396.141  | 58.264  | 12.5   |
| 11    | 4343.647  | 57.568  | 4.4    |
| 12    | 2685.831  | 35.597  | 6.6    |
| 13    | 2577.182  | 34.157  | 7.2    |
| 14    | 2219.494  | 29.416  | 5.5    |
| 15    | 2193.858  | 28.076  | 10.4   |
| 16    | 2146.247  | 28.445  | 24.9   |
| 17    | 2141.364  | 28.380  | 74.6   |
| 18    | 1701.884  | 22.556  | 14.6   |
| 19    | 1067.080  | 14.143  | 20.5   |
| 20    | 1058.535  | 14.029  | 24.3   |

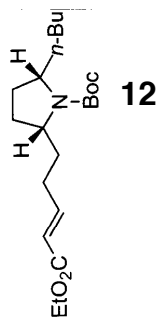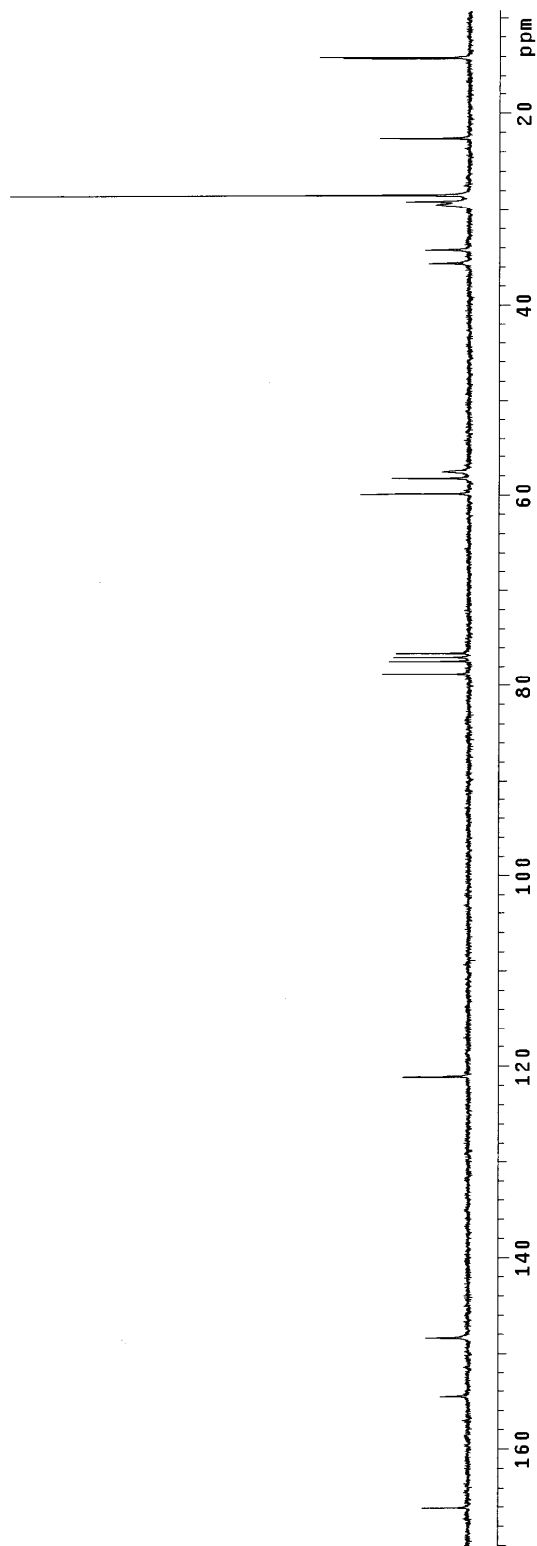

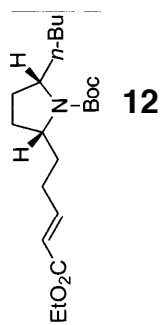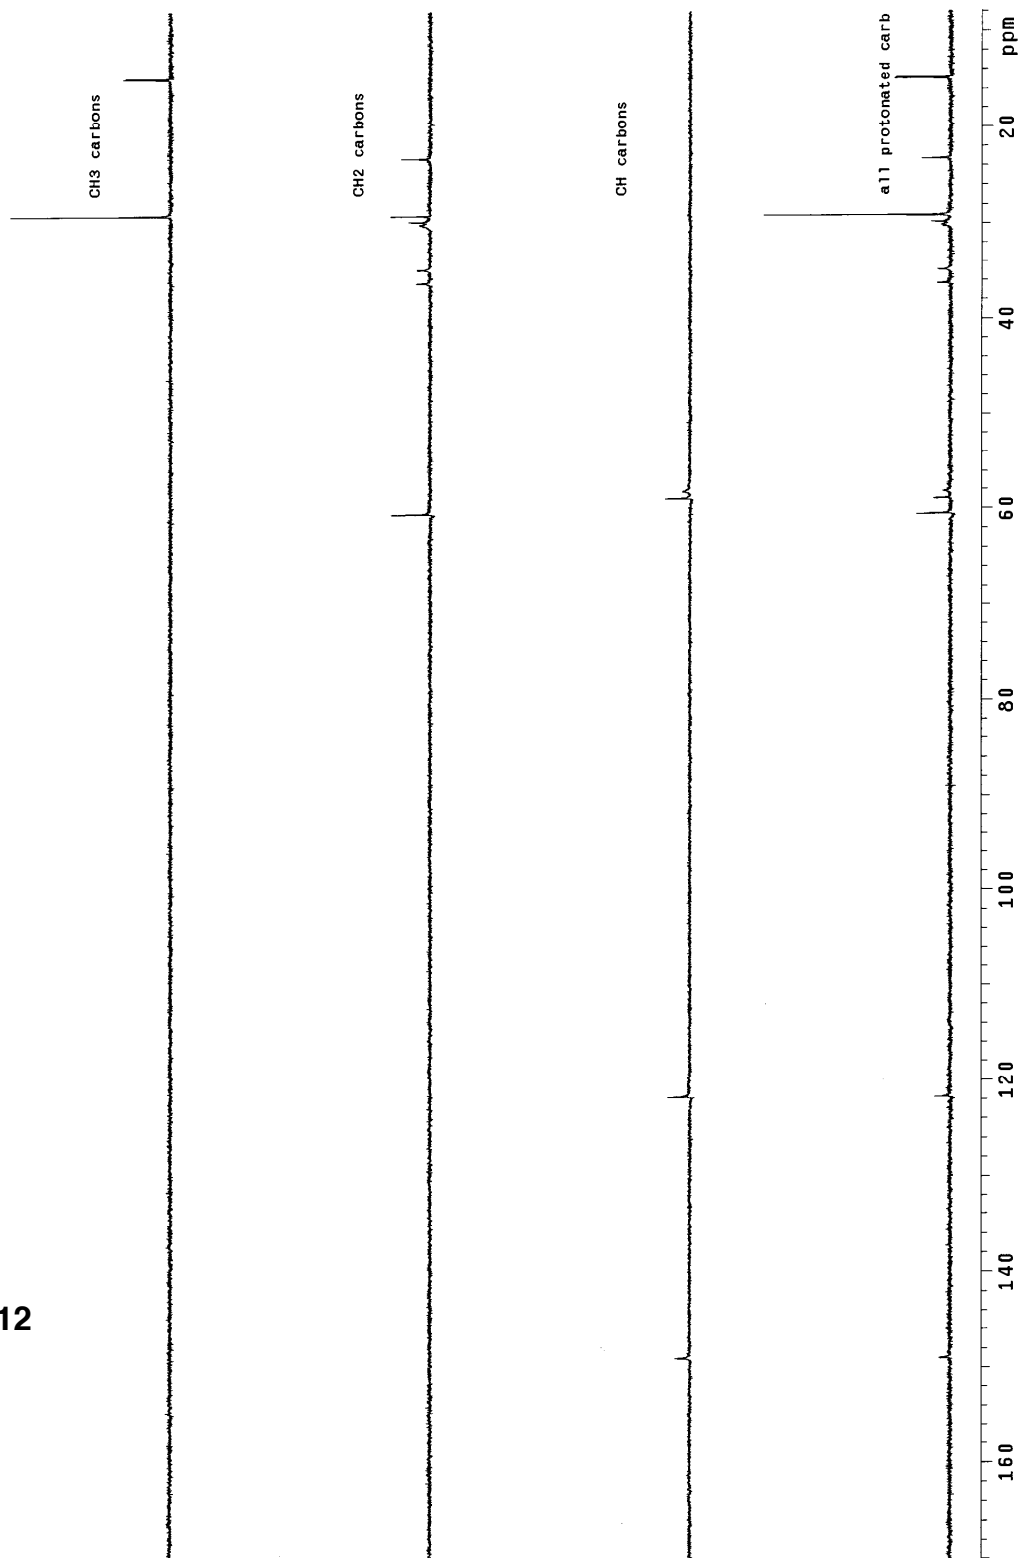

## STANDARD PROTON PARAMETERS

Pulse Sequence: s2pu1

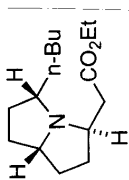**13**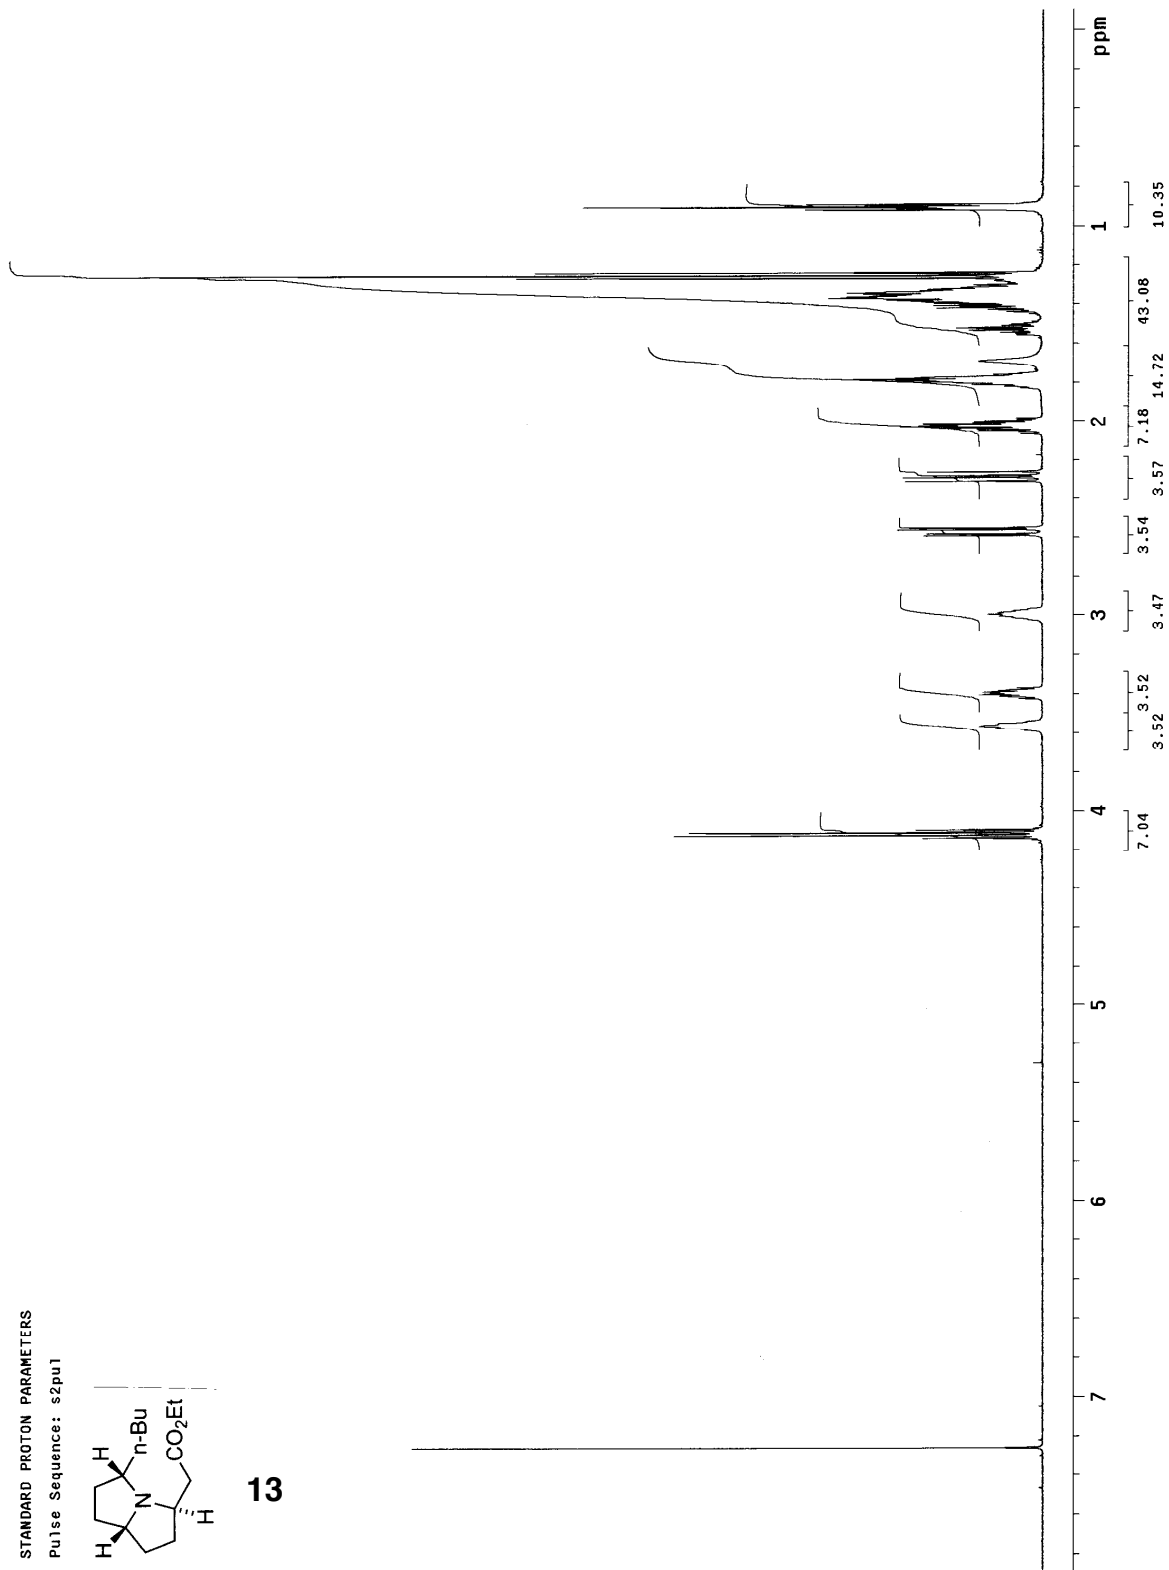

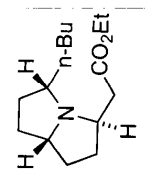

13

| INDEX | FREQUENCY | PPM     | HEIGHT |
|-------|-----------|---------|--------|
| 1     | 12981.869 | 172.055 | 7.3    |
| 2     | 5840.320  | 77.404  | 11.6   |
| 3     | 5808.580  | 76.884  | 13.4   |
| 4     | 5776.840  | 76.563  | 14.2   |
| 5     | 4950.373  | 65.610  | 12.9   |
| 6     | 4808.763  | 63.733  | 14.5   |
| 7     | 4527.984  | 60.011  | 13.9   |
| 8     | 4086.063  | 54.154  | 13.6   |
| 9     | 3260.817  | 43.217  | 13.4   |
| 10    | 2442.896  | 32.377  | 15.0   |
| 11    | 2364.766  | 31.341  | 18.2   |
| 12    | 2335.468  | 30.853  | 19.5   |
| 13    | 2320.818  | 30.759  | 20.1   |
| 14    | 2296.403  | 30.435  | 17.8   |
| 15    | 2278.091  | 30.193  | 18.2   |
| 16    | 1729.962  | 22.928  | 18.6   |
| 17    | 1074.404  | 14.240  | 14.5   |
| 18    | 1060.976  | 14.062  | 13.3   |

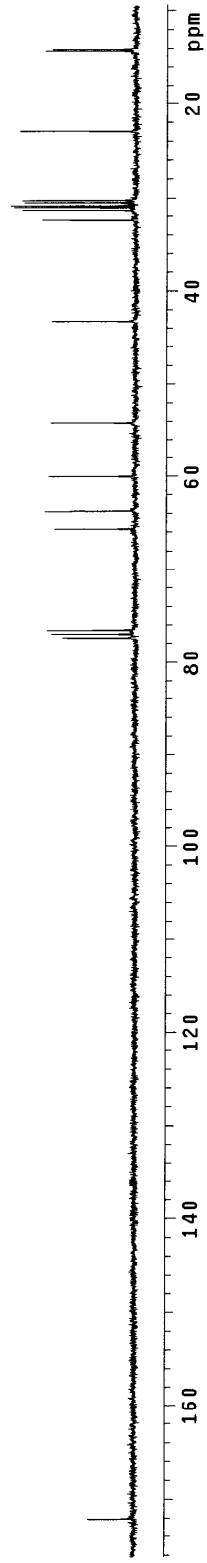

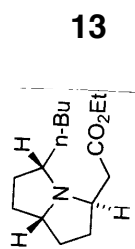

CH3 carbons

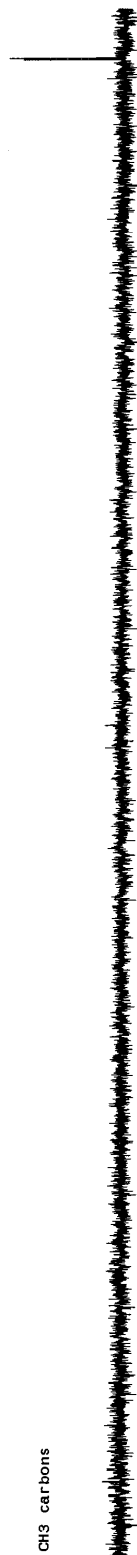

CH2 carbons

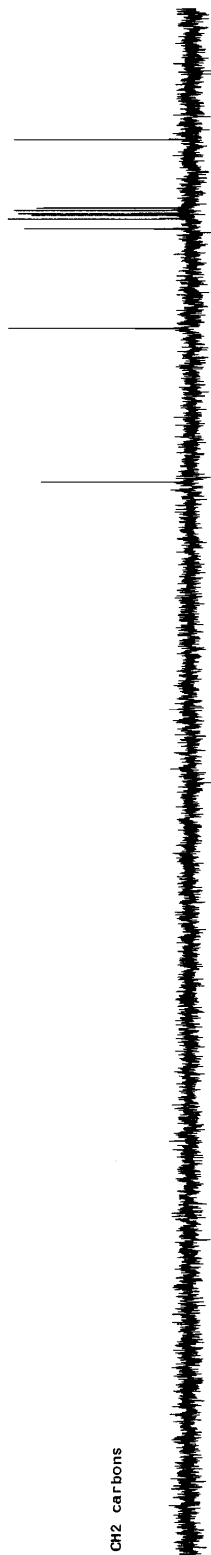

CH carbons

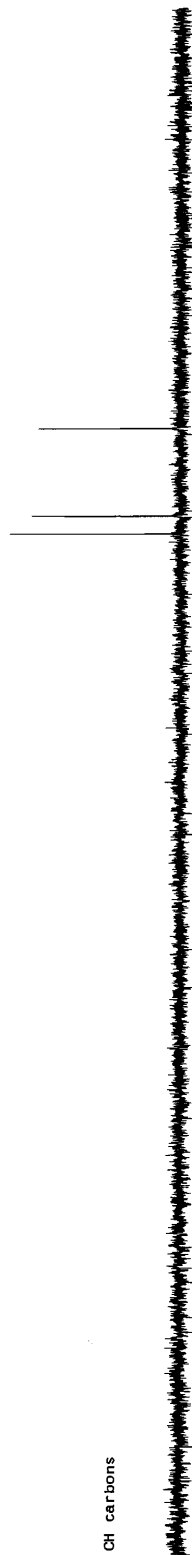

all protonated carbons

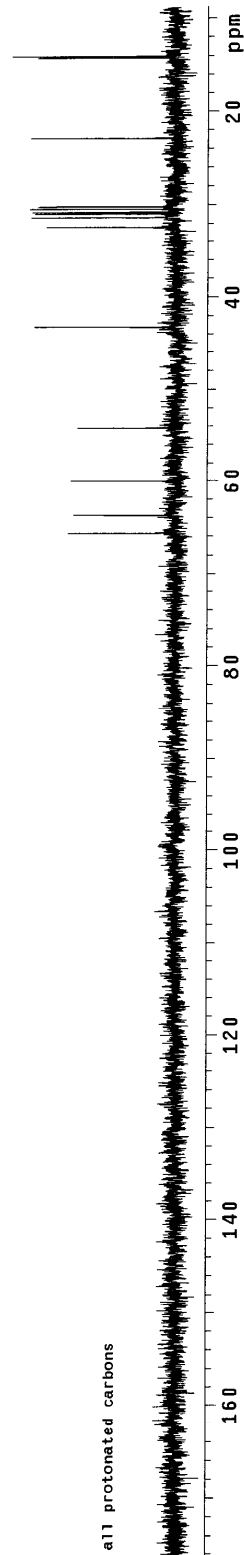

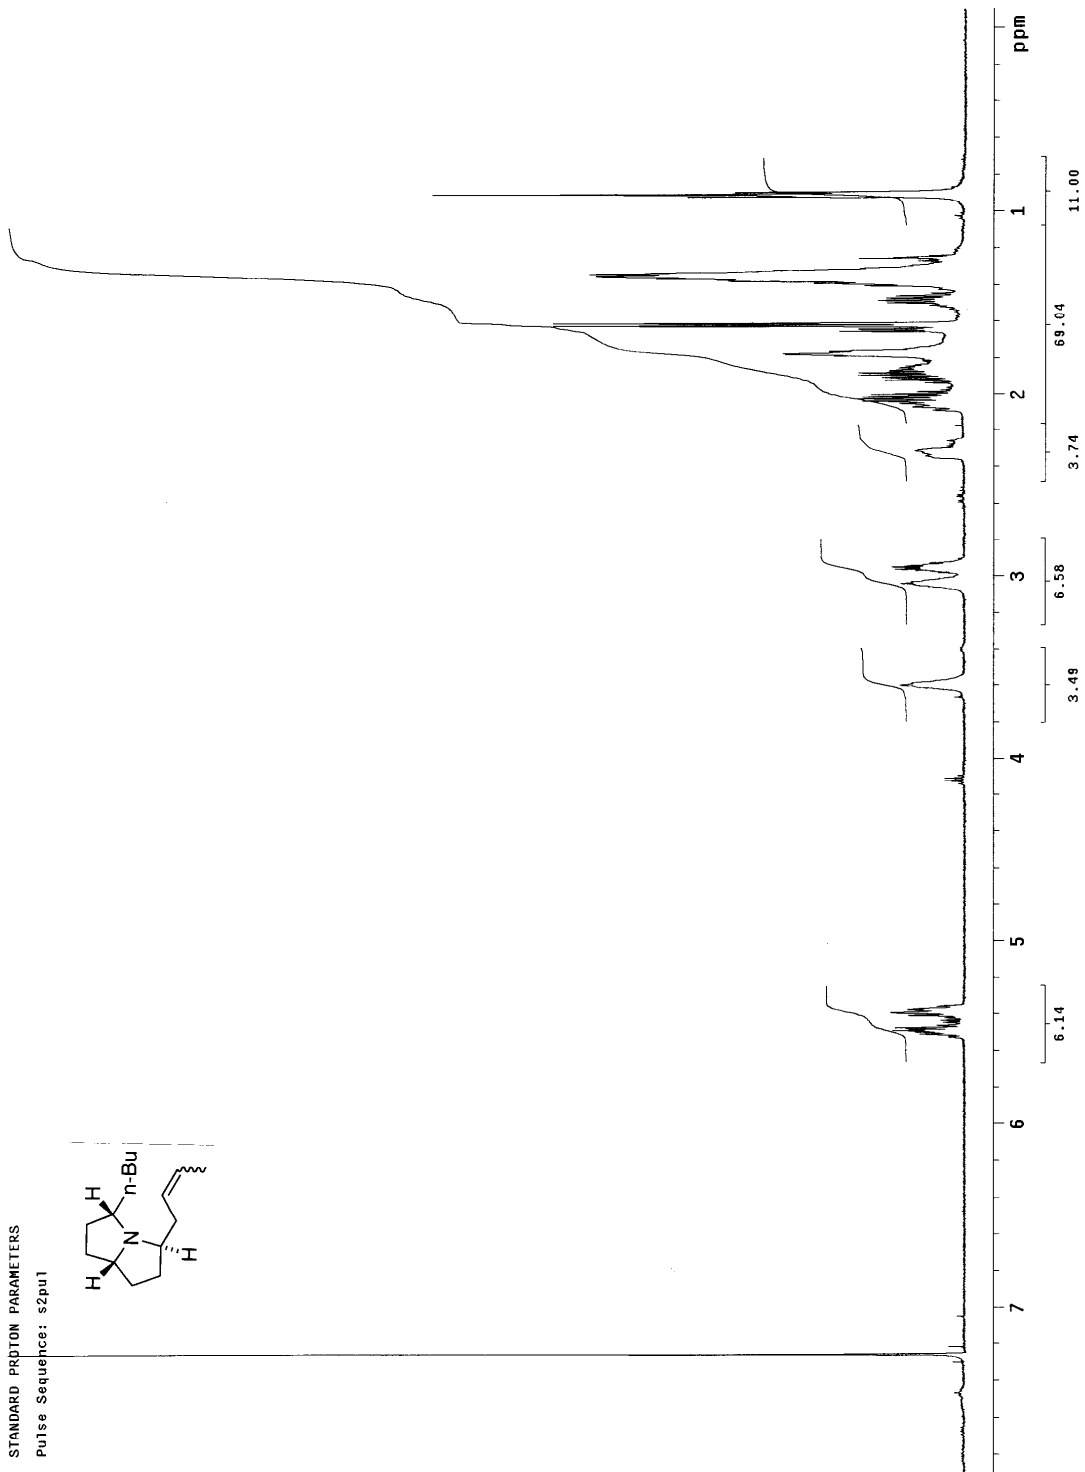



STANDARD 1H OBSERVE

Pulse Sequence: s2pu1

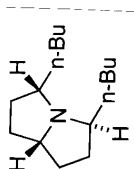

14

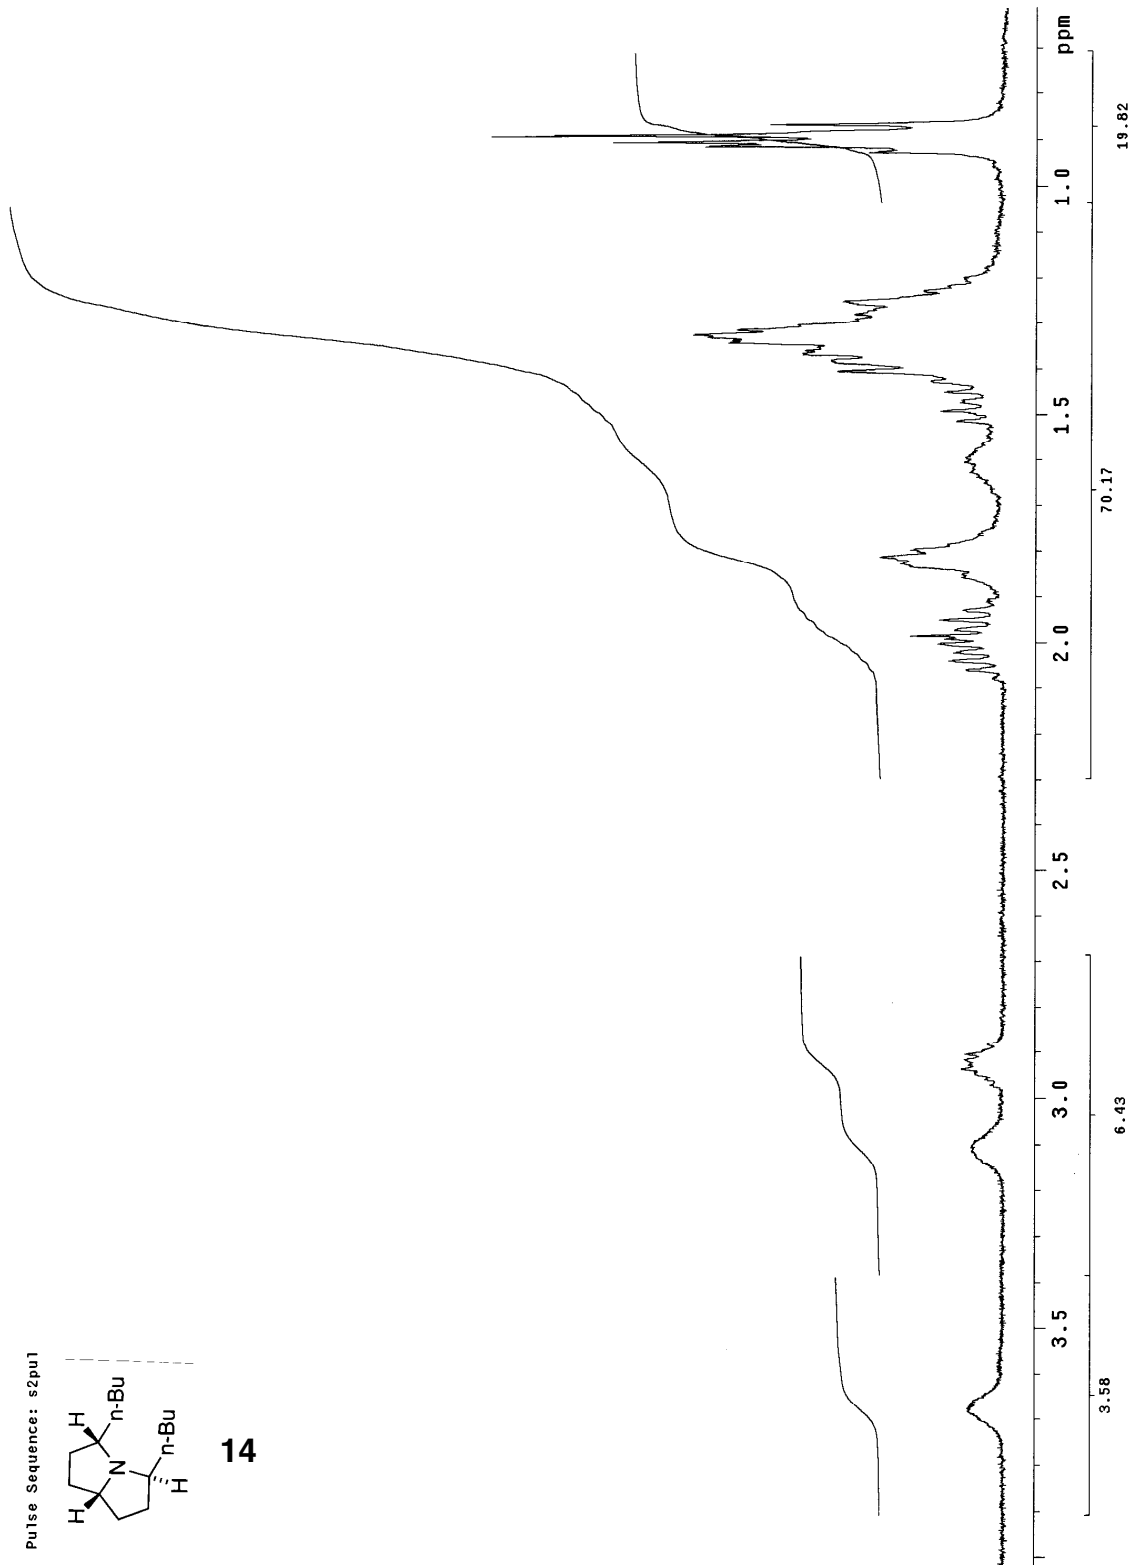

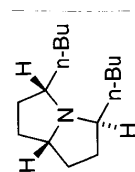

14

| INDEX | FREQUENCY | PPM    | HEIGHT |
|-------|-----------|--------|--------|
| 1     | 5841.541  | 77.421 | 36.1   |
| 2     | 5809.801  | 77.000 | 36.0   |
| 3     | 5778.060  | 76.579 | 32.4   |
| 4     | 4982.113  | 66.030 | 10.9   |
| 5     | 4829.516  | 64.008 | 10.8   |
| 6     | 4388.815  | 58.167 | 7.2    |
| 7     | 2839.649  | 37.635 | 6.0    |
| 8     | 2418.701  | 32.069 | 14.3   |
| 9     | 2385.519  | 31.616 | 13.6   |
| 10    | 2329.364  | 30.872 | 13.2   |
| 11    | 2313.493  | 30.662 | 13.5   |
| 12    | 2286.403  | 30.435 | 10.2   |
| 13    | 2267.104  | 30.047 | 14.1   |
| 14    | 2214.610  | 29.551 | 15.1   |
| 15    | 1736.066  | 23.009 | 15.5   |
| 16    | 1727.520  | 22.846 | 14.4   |
| 17    | 1069.521  | 14.175 | 11.5   |
| 18    | 1065.859  | 14.126 | 11.9   |

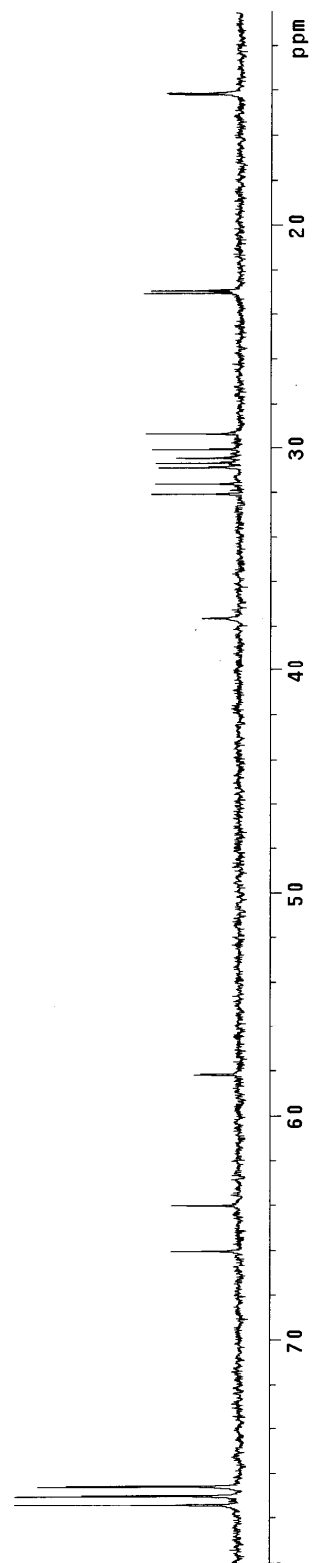

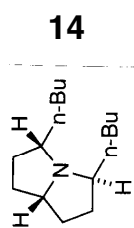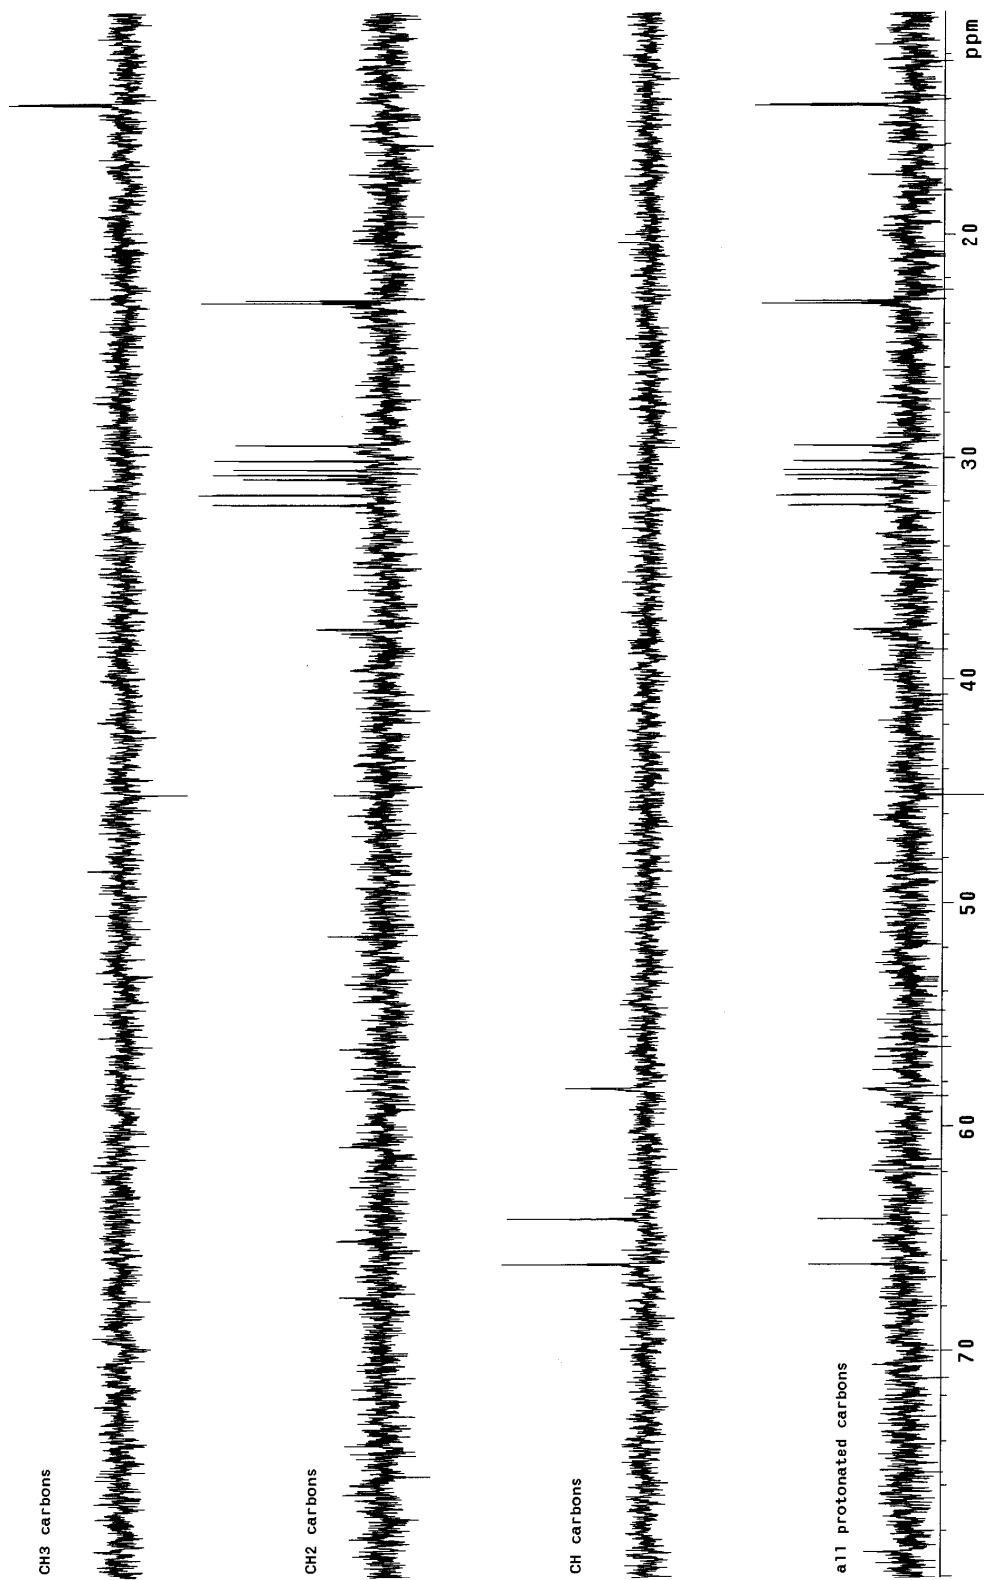

STANDARD PROTON PARAMETERS  
Pulse Sequence: s2pu1

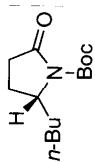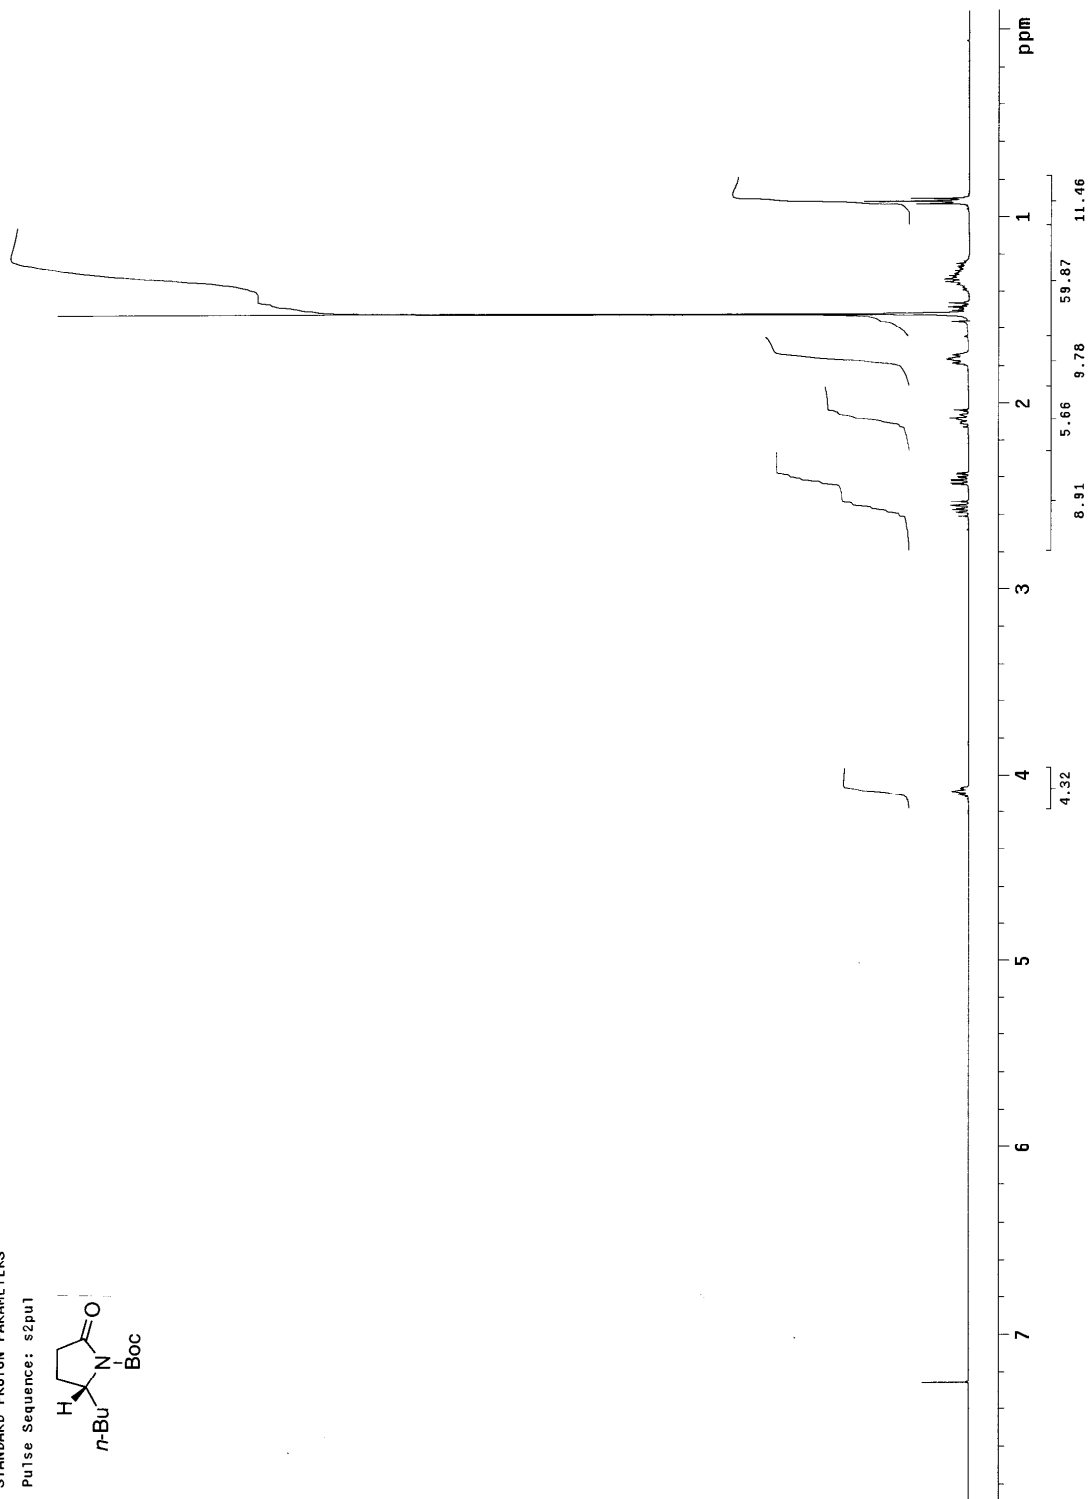

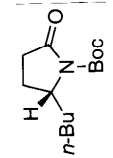

| INDEX | FREQUENCY PPM | HEIGHT  |
|-------|---------------|---------|
| 1     | 13130.805     | 174.025 |
| 2     | 11278.885     | 149.484 |
| 3     | 6202.892      | 82.210  |
| 4     | 5842.763      | 77.437  |
| 5     | 5809.802      | 77.000  |
| 6     | 5778.061      | 76.579  |
| 7     | 4358.518      | 57.779  |
| 8     | 2487.832      | 33.105  |
| 9     | 2350.118      | 31.147  |
| 10    | 2096.196      | 27.782  |
| 11    | 2075.443      | 27.507  |
| 12    | 1681.132      | 22.281  |
| 13    | 1677.469      | 22.232  |
| 14    | 1042.665      | 13.819  |

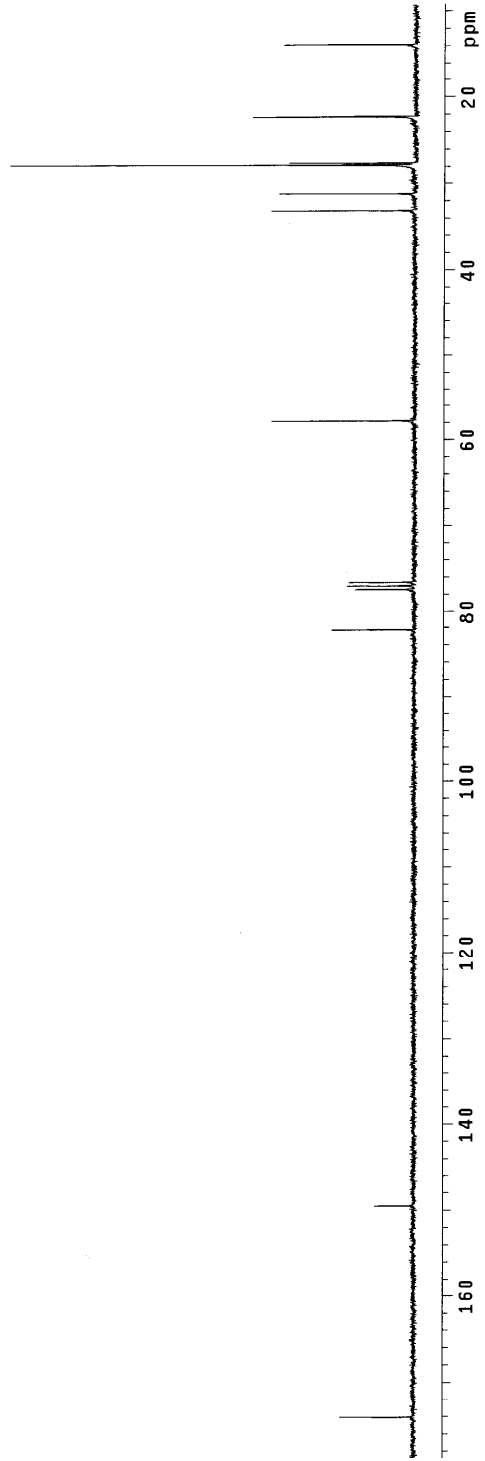

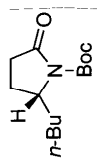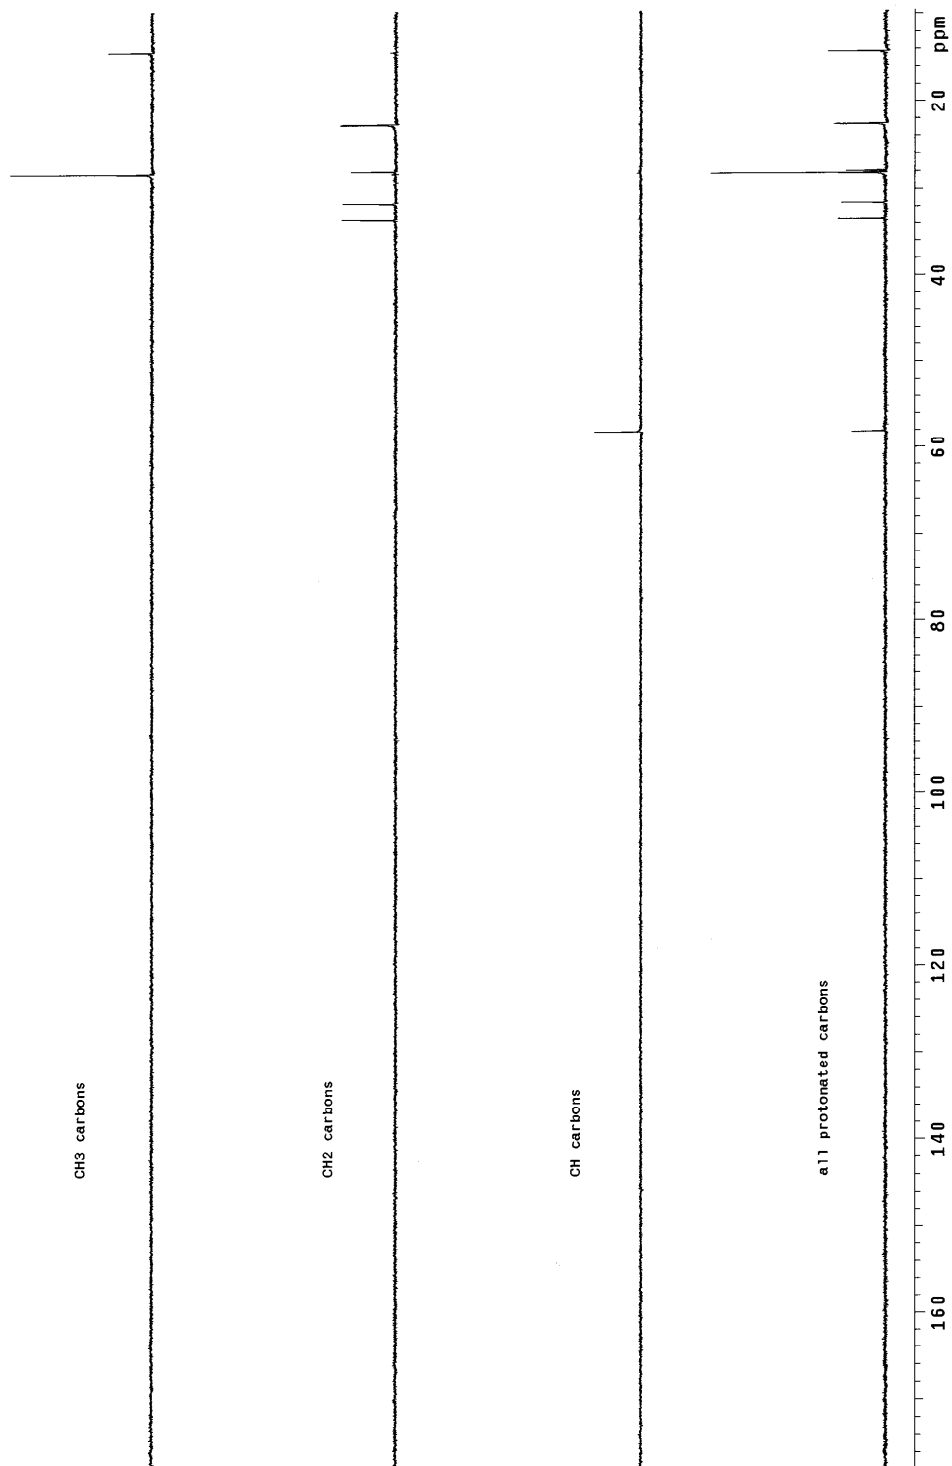

## STANDARD PROTON PARAMETERS

Pulse Sequence: s2pu1

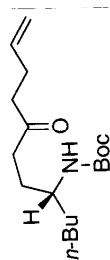

15

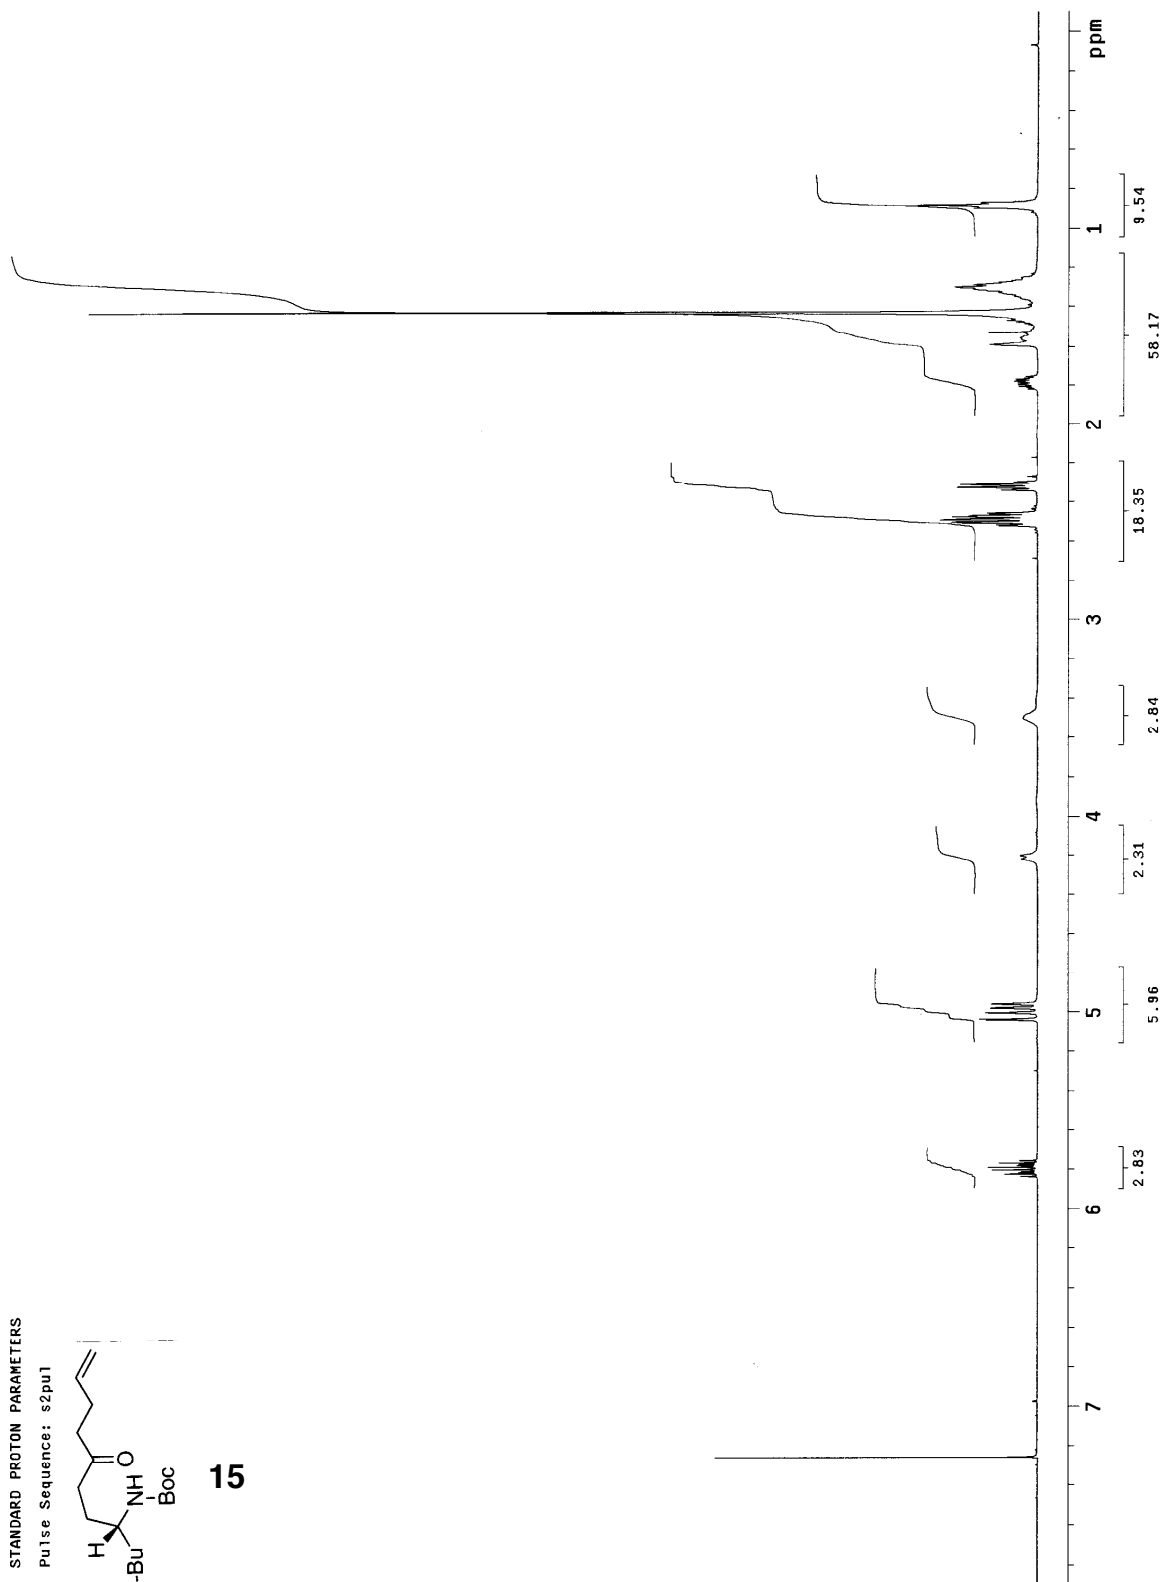

| INDEX | FREQUENCY | PPM     | HEIGHT |
|-------|-----------|---------|--------|
| 1     | 15767.685 | 208.976 | 15.8   |
| 2     | 11715.924 | 155.277 | 18.6   |
| 3     | 10301.043 | 136.524 | 29.2   |
| 4     | 8637.123  | 114.472 | 32.6   |
| 5     | 5883.049  | 77.971  | 23.1   |
| 6     | 5842.763  | 77.437  | 13.0   |
| 7     | 5809.802  | 77.000  | 11.5   |
| 8     | 5778.062  | 76.578  | 12.9   |
| 9     | 3762.558  | 49.867  | 22.4   |
| 10    | 3124.091  | 41.405  | 59.0   |
| 11    | 2938.533  | 38.946  | 24.6   |
| 12    | 2657.754  | 35.224  | 25.0   |
| 13    | 2176.768  | 28.850  | 25.2   |
| 14    | 2109.625  | 27.960  | 162.3  |
| 15    | 2091.313  | 27.717  | 58.5   |
| 16    | 2060.794  | 27.313  | 59.8   |
| 17    | 1671.366  | 22.151  | 35.1   |
| 18    | 1028.016  | 13.625  | 63.6   |

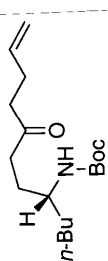**15**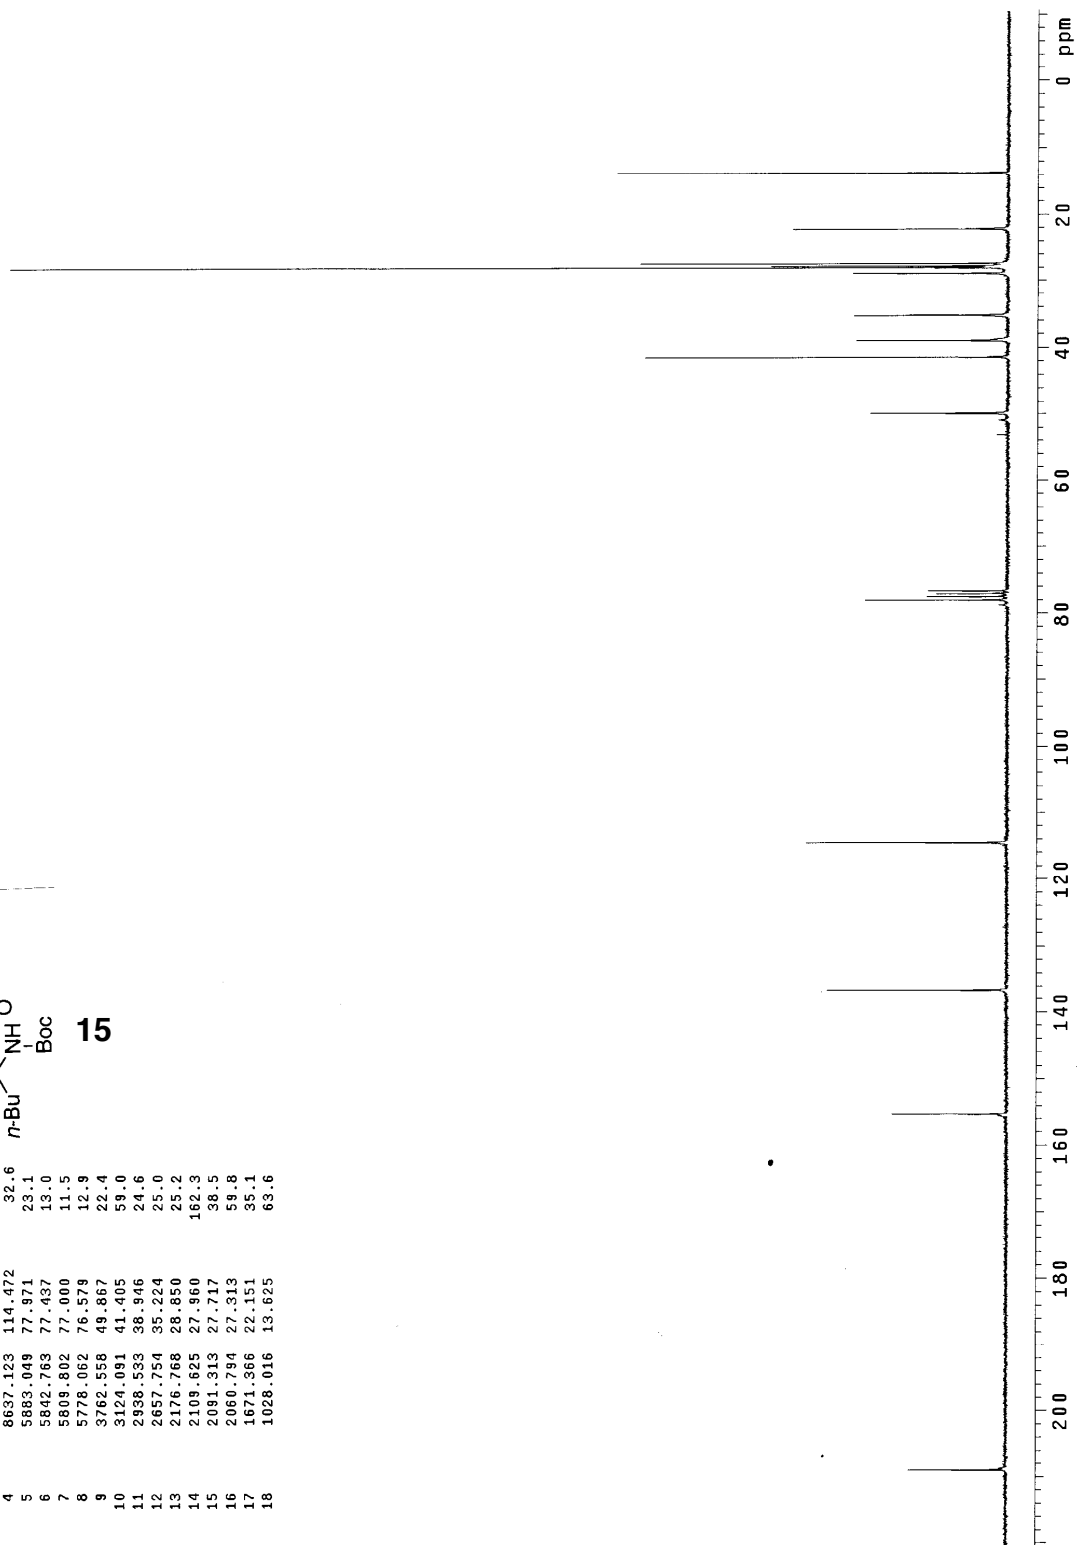



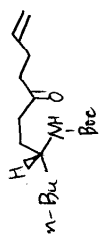

15

CH3 carbons

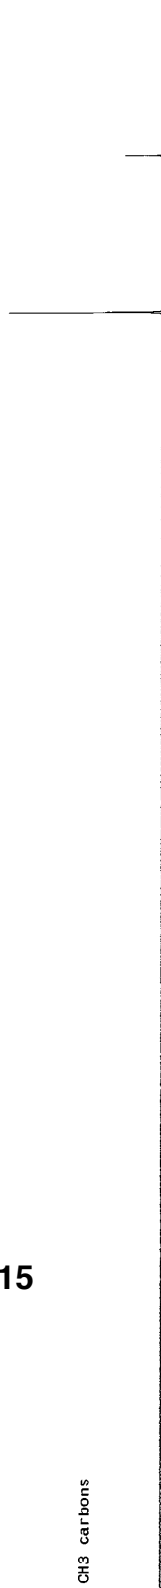

CH2 carbons

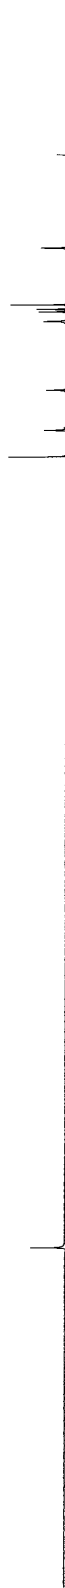

CH carbons

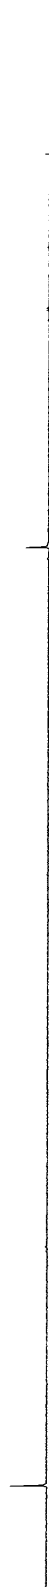

all protonated carbons

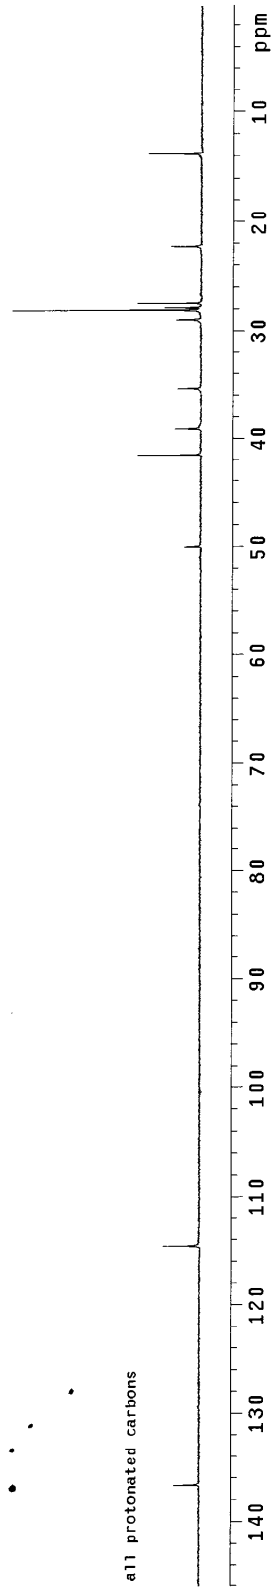

STANDARD PROTON PARAMETERS

Pulse Sequence: s2pu1

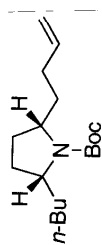

ent-11

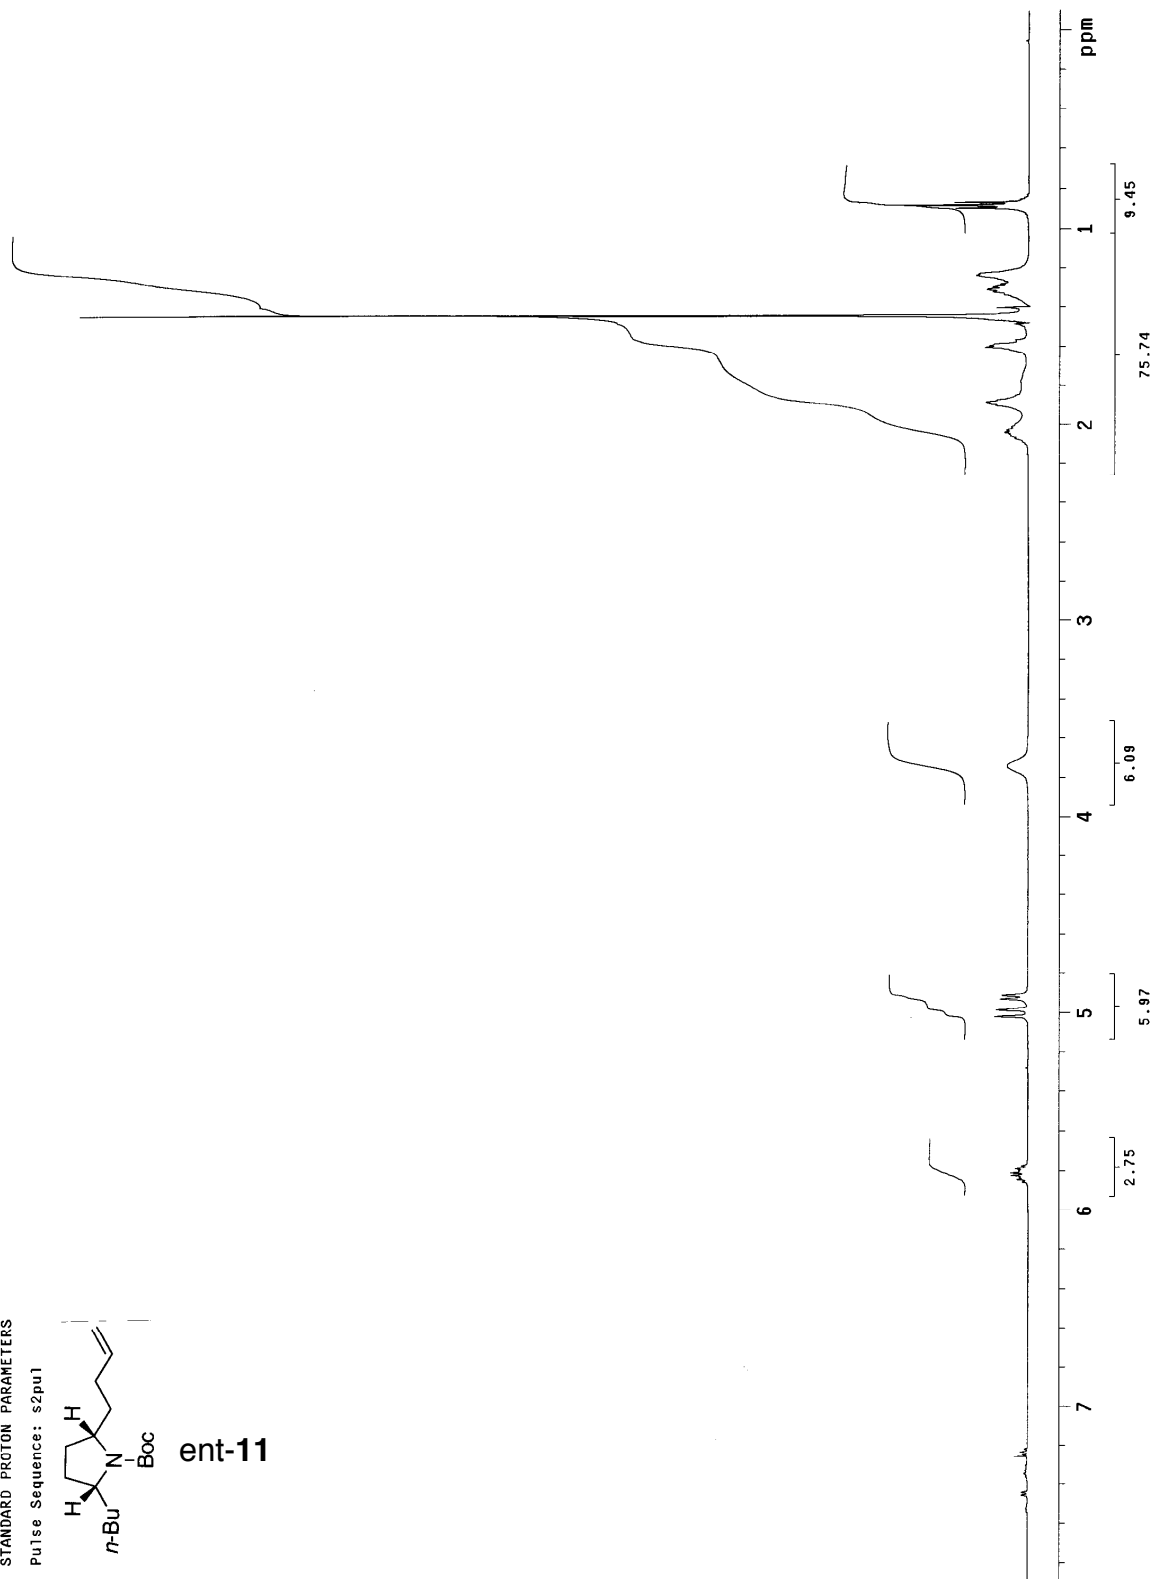

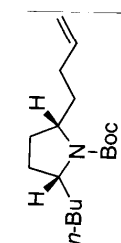

ent-11

| INDEX | FREQUENCY | PPM     | HEIGHT |
|-------|-----------|---------|--------|
| 1     | 11673.196 | 154.710 | 10.5   |
| 2     | 10437.769 | 138.337 | 21.3   |
| 3     | 10183.847 | 134.971 | 3.7    |
| 4     | 9778.549  | 129.600 | 2.3    |
| 5     | 9619.848  | 127.496 | 4.0    |
| 6     | 8621.252  | 114.261 | 25.1   |
| 7     | 5939.203  | 78.715  | 24.9   |
| 8     | 5841.541  | 77.421  | 20.9   |
| 9     | 5809.801  | 77.000  | 21.3   |
| 10    | 5778.060  | 76.579  | 20.1   |
| 11    | 4403.465  | 58.361  | 18.4   |
| 12    | 4366.841  | 57.876  | 15.5   |
| 13    | 2690.714  | 35.661  | 12.0   |
| 14    | 2652.870  | 35.160  | 8.5    |
| 15    | 2324.480  | 30.807  | 21.6   |
| 16    | 2223.156  | 29.485  | 7.8    |
| 17    | 2162.117  | 28.856  | 27.4   |
| 18    | 2156.013  | 28.575  | 90.1   |
| 19    | 1716.533  | 22.750  | 21.1   |
| 20    | 1071.963  | 14.207  | 30.0   |

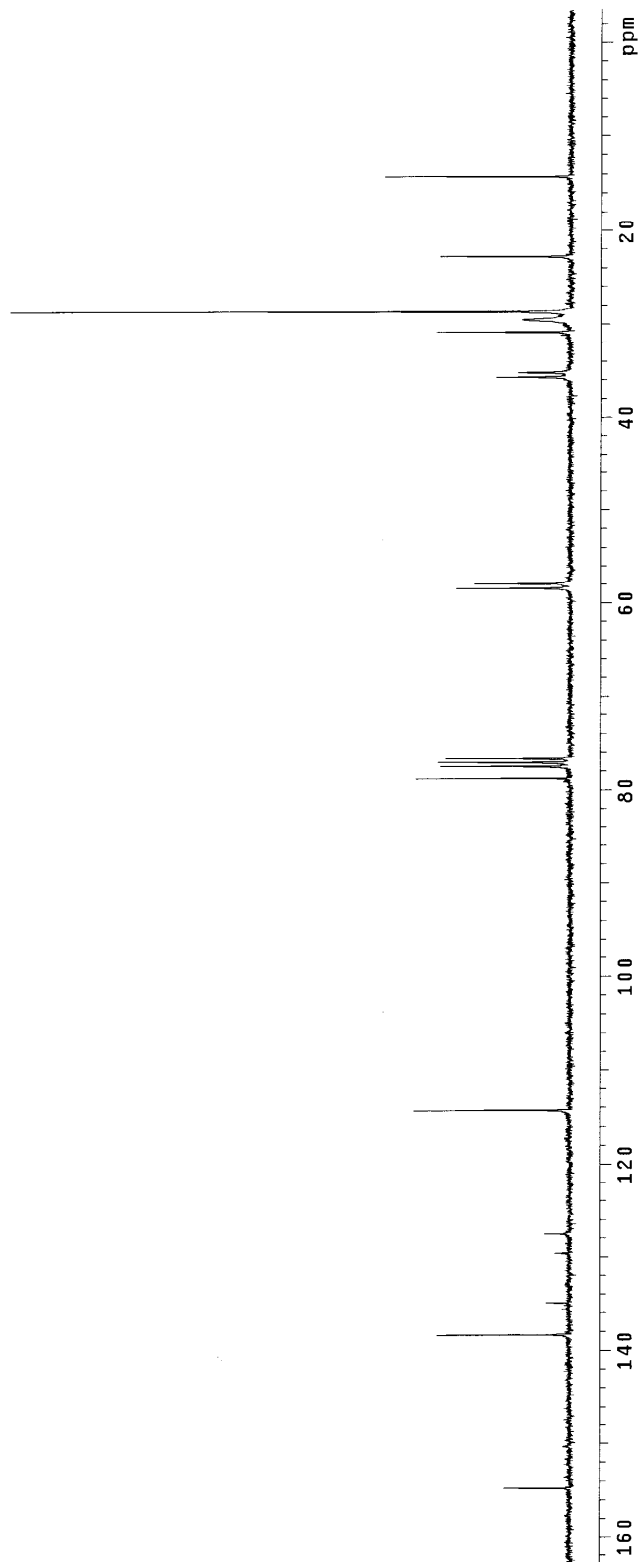

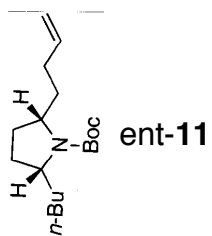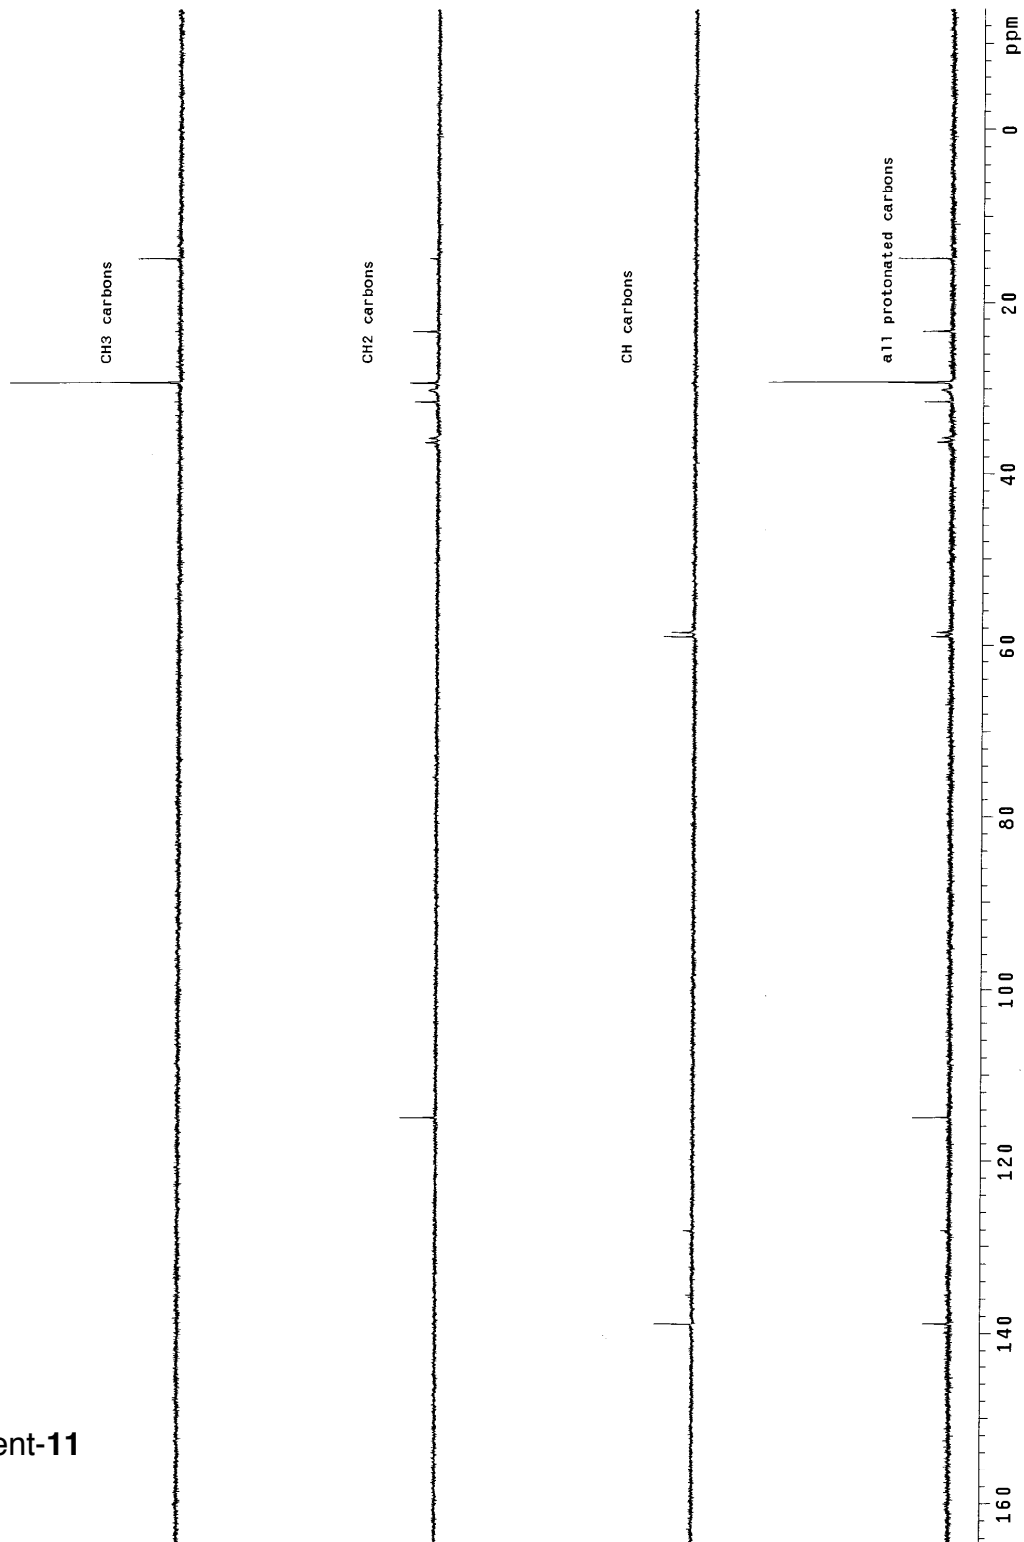

STANDARD 1H OBSERVE

Pulse Sequence: s2pu1

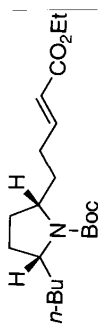

ent-12

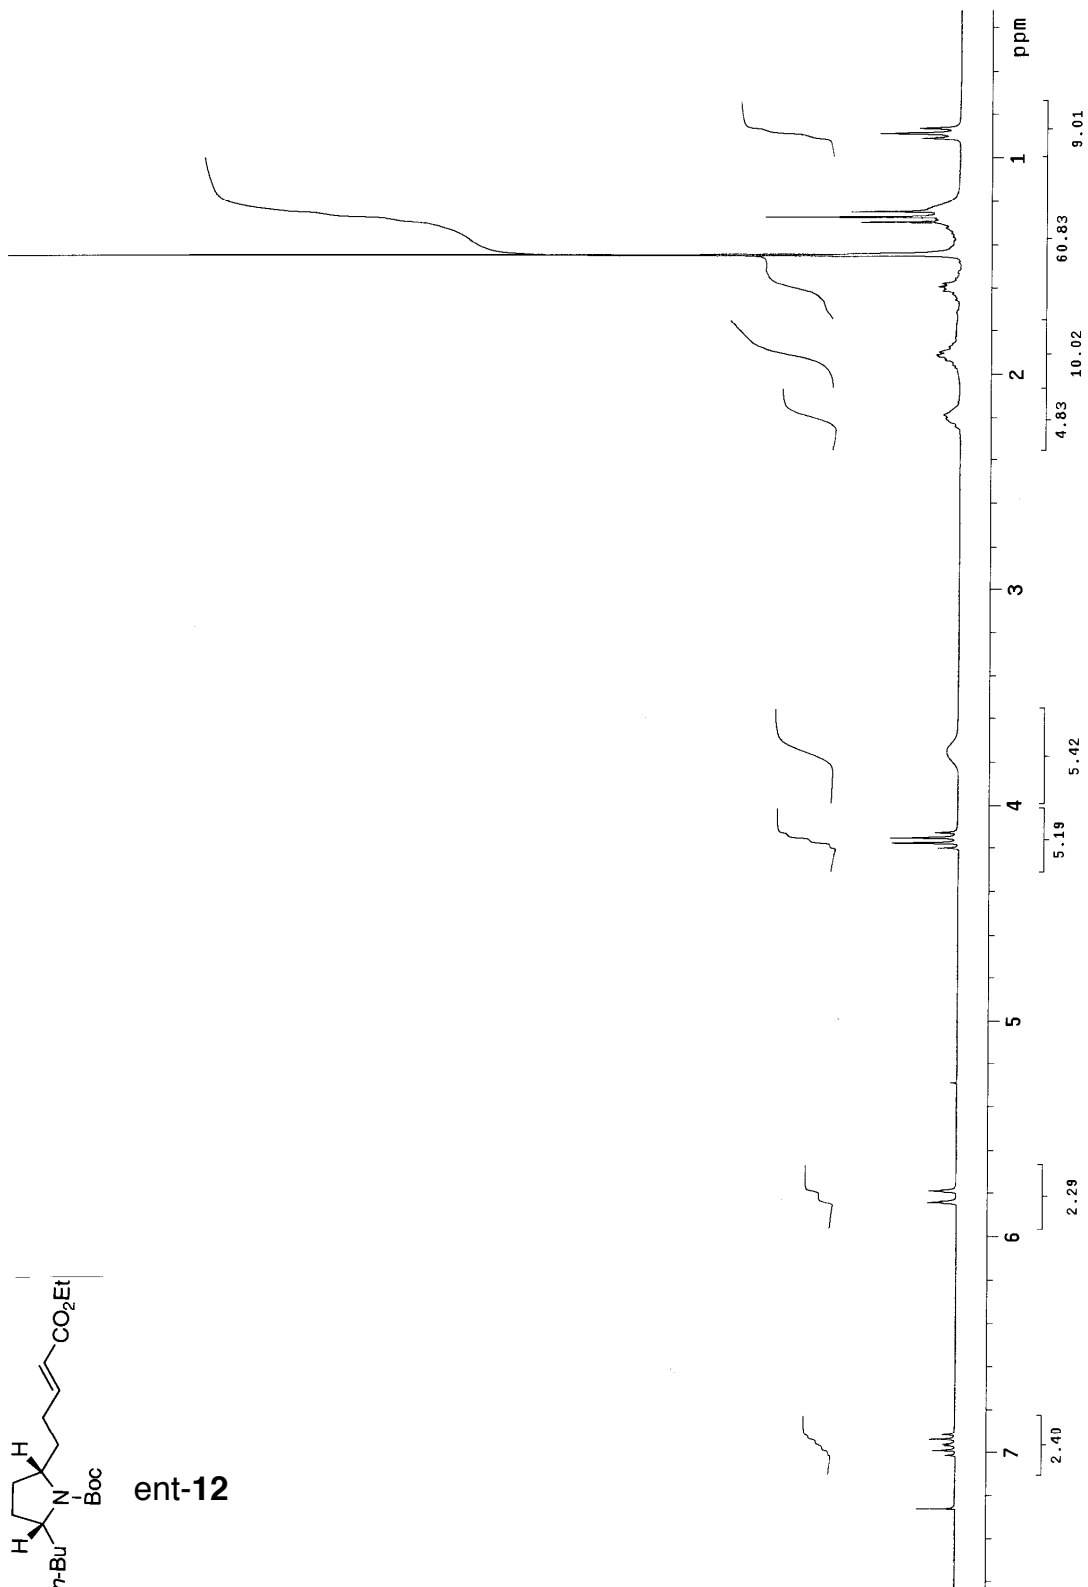

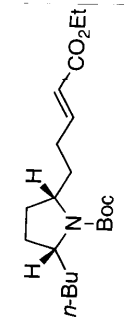

ent-12

| INDEX | FREQUENCY | PPM     | HEIGHT |
|-------|-----------|---------|--------|
| 1     | 12536.286 | 166.149 | 12.2   |
| 2     | 11663.430 | 154.581 | 7.7    |
| 3     | 11194.651 | 148.368 | 13.2   |
| 4     | 9136.420  | 121.069 | 19.4   |
| 5     | 5942.866  | 76.764  | 20.5   |
| 6     | 5842.762  | 77.437  | 23.1   |
| 7     | 5809.801  | 77.000  | 23.1   |
| 8     | 5778.061  | 76.579  | 25.3   |
| 9     | 4519.439  | 59.898  | 32.4   |
| 10    | 4397.361  | 58.260  | 21.7   |
| 11    | 4344.868  | 57.565  | 6.2    |
| 12    | 2685.831  | 35.597  | 12.3   |
| 13    | 2578.403  | 34.173  | 12.9   |
| 14    | 2220.715  | 29.432  | 9.3    |
| 15    | 2196.299  | 29.109  | 18.3   |
| 16    | 2147.468  | 28.461  | 37.5   |
| 17    | 2142.585  | 28.397  | 106.1  |
| 18    | 1704.326  | 22.588  | 25.9   |
| 19    | 1069.521  | 14.175  | 46.9   |
| 20    | 1060.976  | 14.062  | 41.5   |

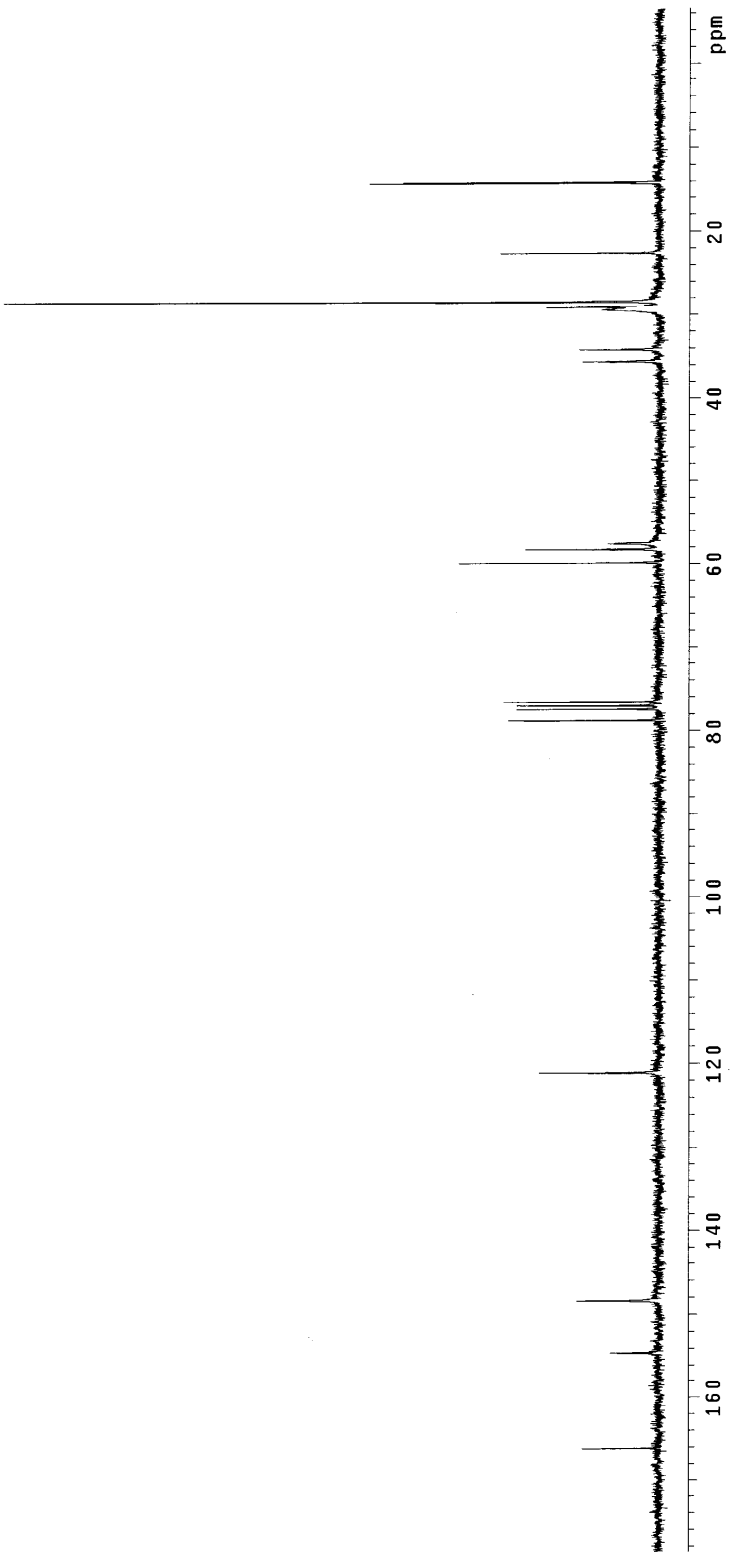

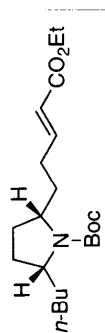

ent-12

CH<sub>3</sub> carbons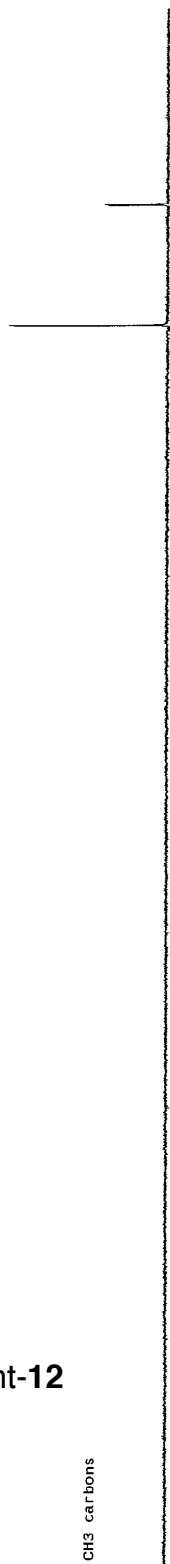CH<sub>2</sub> carbons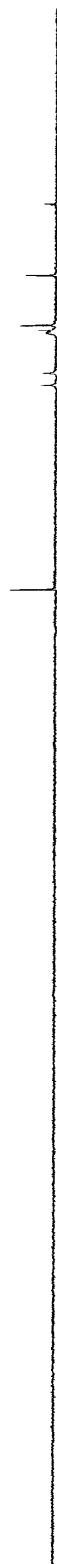

CH carbons

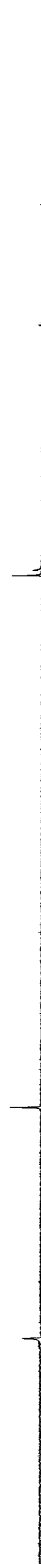

all protonated carbons

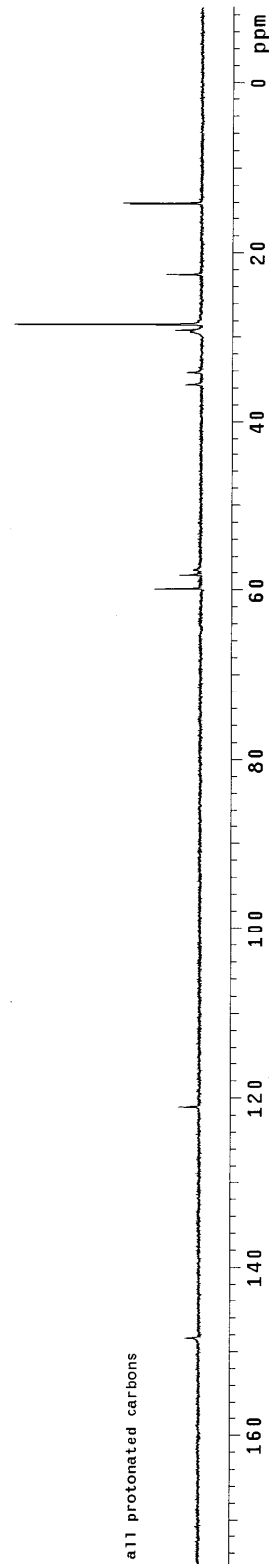

STANDARD PROTON PARAMETERS

Pulse Sequence: s2pu1

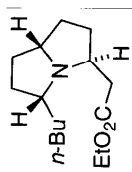

ent-13

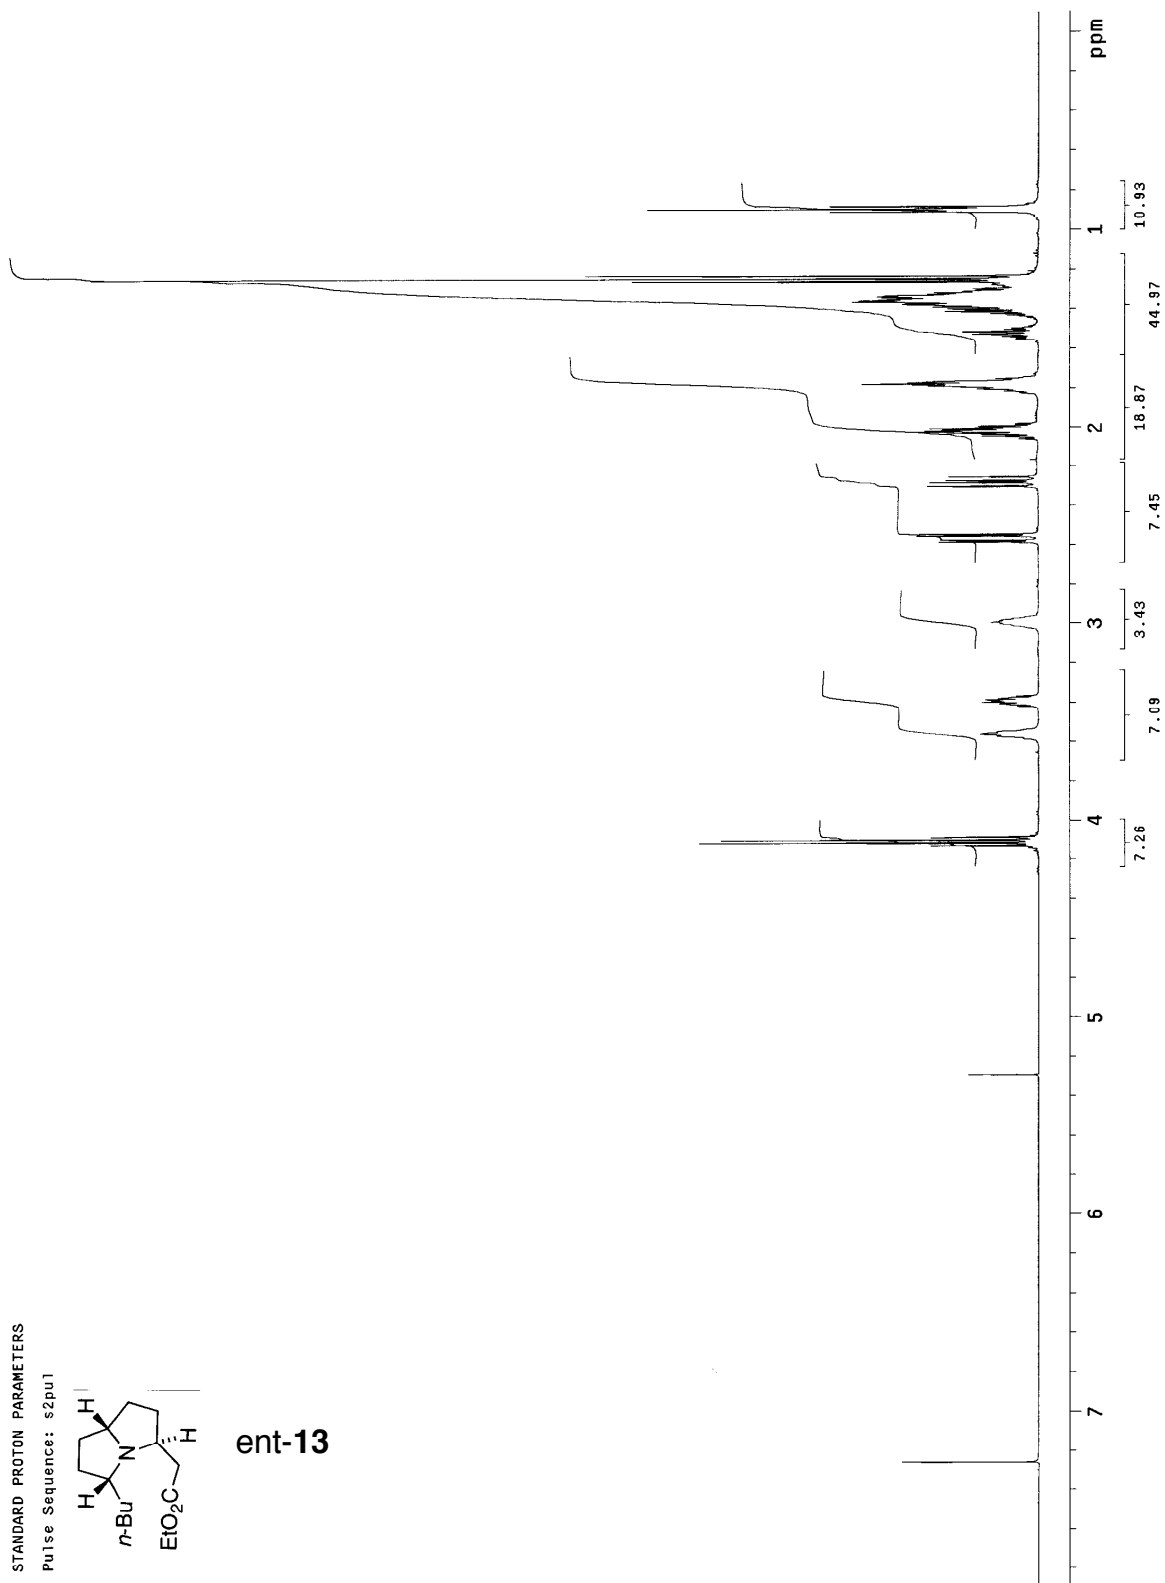



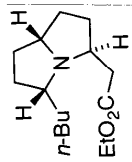

ent-13

| INDEX | FREQUENCY | PPM     | HEIGHT |
|-------|-----------|---------|--------|
| 1     | 12973.324 | 171.942 | 9.7    |
| 2     | 5841.541  | 77.421  | 9.6    |
| 3     | 5809.801  | 77.000  | 10.8   |
| 4     | 5778.061  | 76.579  | 10.7   |
| 5     | 4944.270  | 65.529  | 18.4   |
| 6     | 4801.439  | 63.636  | 18.2   |
| 7     | 4520.660  | 59.914  | 17.2   |
| 8     | 4077.517  | 54.041  | 20.9   |
| 9     | 3257.155  | 43.169  | 23.2   |
| 10    | 2436.792  | 32.296  | 18.5   |
| 11    | 2358.663  | 31.260  | 23.0   |
| 12    | 2329.364  | 30.872  | 19.9   |
| 13    | 2314.715  | 30.678  | 24.4   |
| 14    | 2291.520  | 30.371  | 22.9   |
| 15    | 2273.208  | 30.128  | 23.4   |
| 16    | 1723.858  | 22.847  | 19.5   |
| 17    | 1068.301  | 14.159  | 21.1   |
| 18    | 1056.093  | 13.997  | 17.7   |

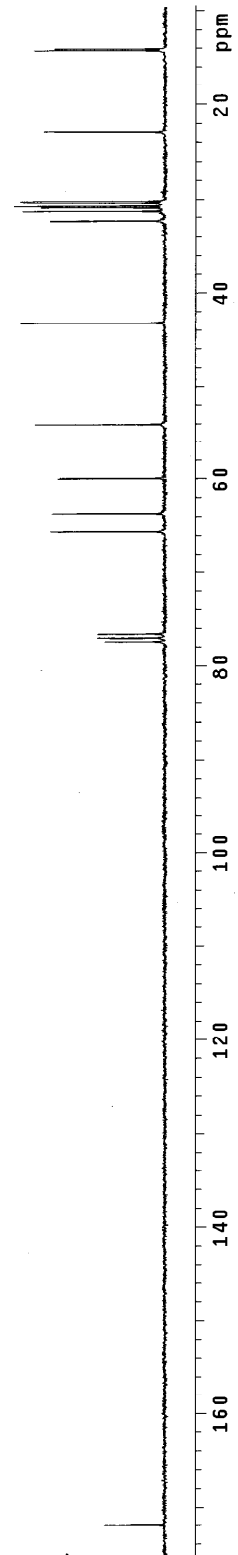

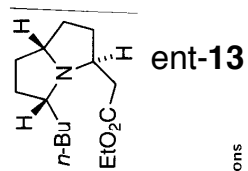CH<sub>3</sub> carbons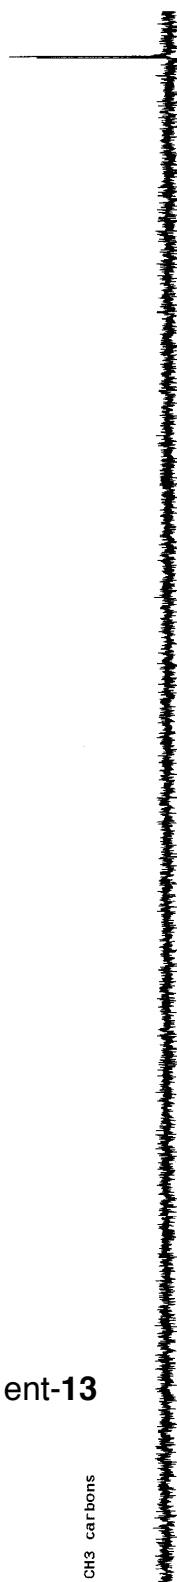CH<sub>2</sub> carbons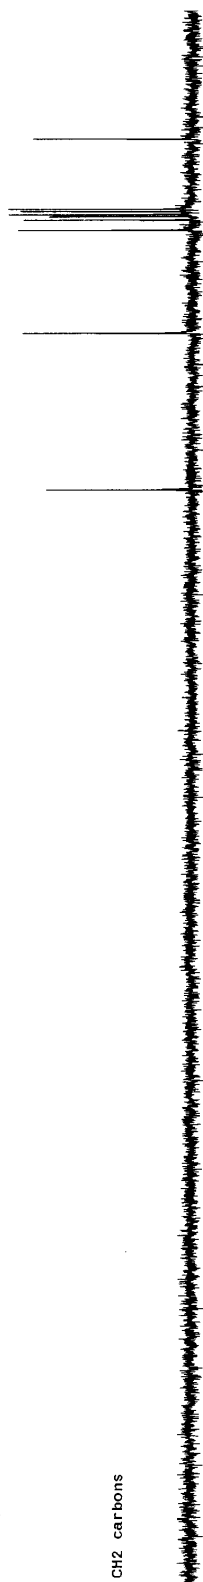

CH carbons

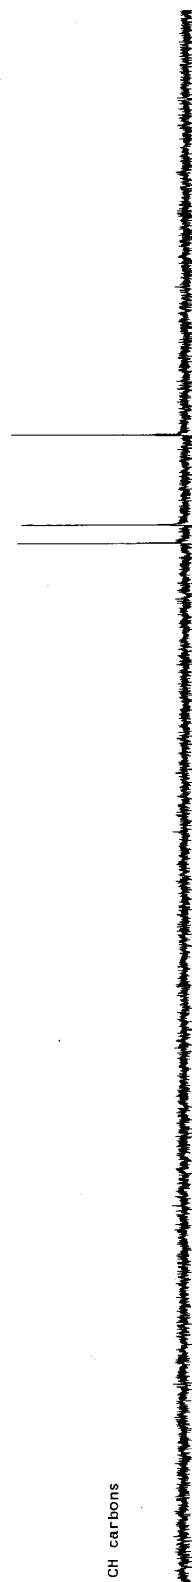

all protonated carbons

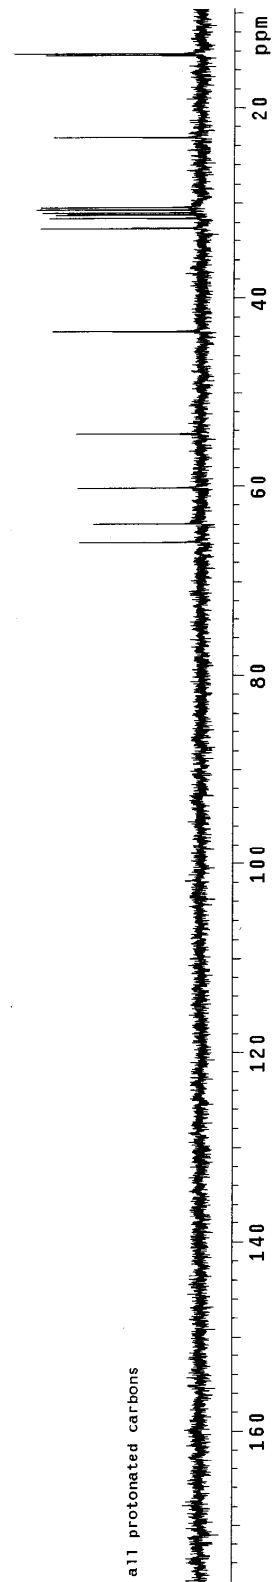

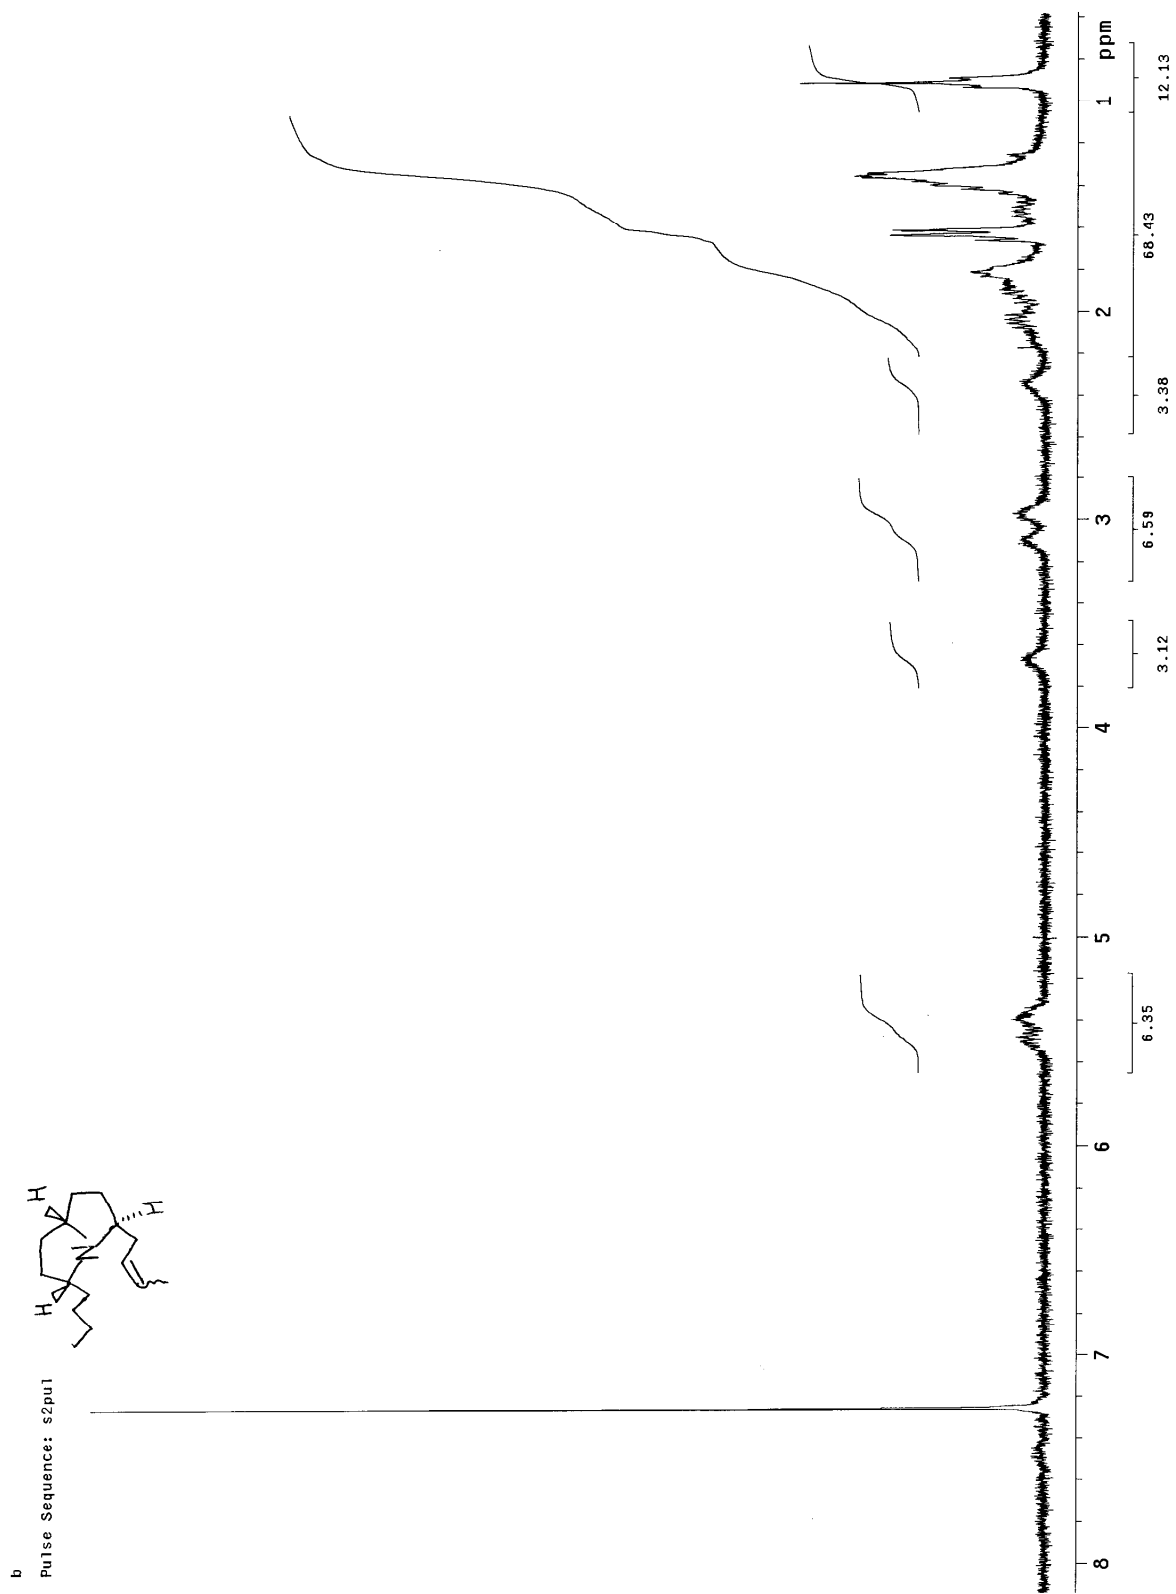

STANDARD 1H OBSERVE

Pulse Sequence: s2pu1

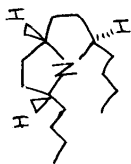

ent-14

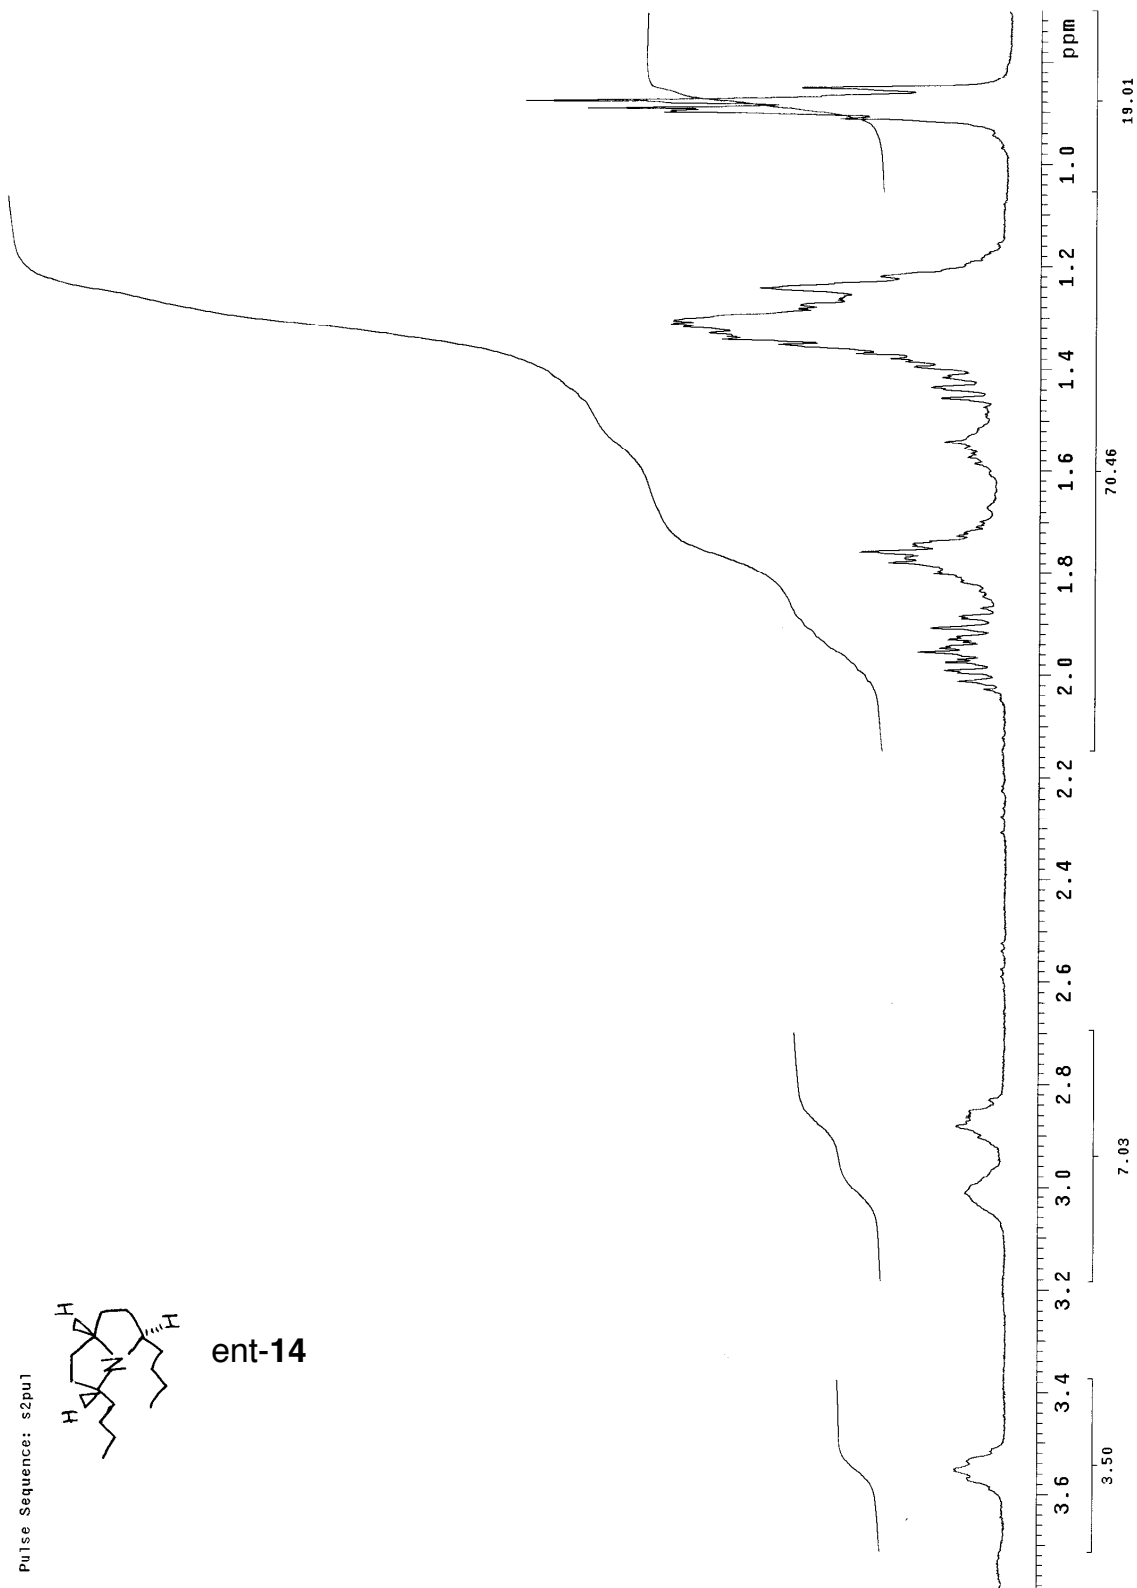

| INDEX | FREQUENCY PPM | HEIGHT |
|-------|---------------|--------|
| 1     | 5841.541      | 77.421 |
| 2     | 5809.800      | 77.000 |
| 3     | 5778.060      | 76.579 |
| 4     | 4963.802      | 65.788 |
| 5     | 4824.633      | 63.983 |
| 6     | 4344.867      | 57.585 |
| 7     | 2897.025      | 38.386 |
| 8     | 2422.143      | 32.102 |
| 9     | 2391.623      | 31.697 |
| 10    | 2352.558      | 31.180 |
| 11    | 2331.805      | 30.985 |
| 12    | 2308.610      | 30.597 |
| 13    | 2281.753      | 30.241 |
| 14    | 2218.273      | 29.400 |
| 15    | 1740.949      | 23.074 |
| 16    | 1736.065      | 23.008 |
| 17    | 1073.163      | 14.223 |
| 18    | 1069.521      | 14.175 |

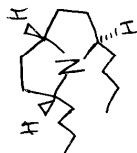

ent-14

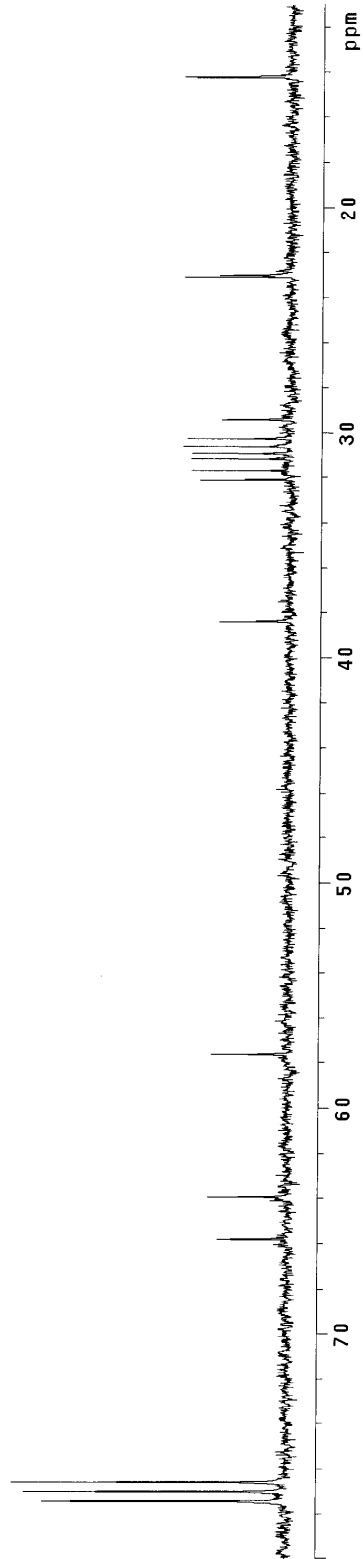

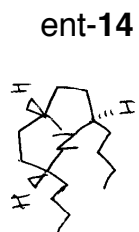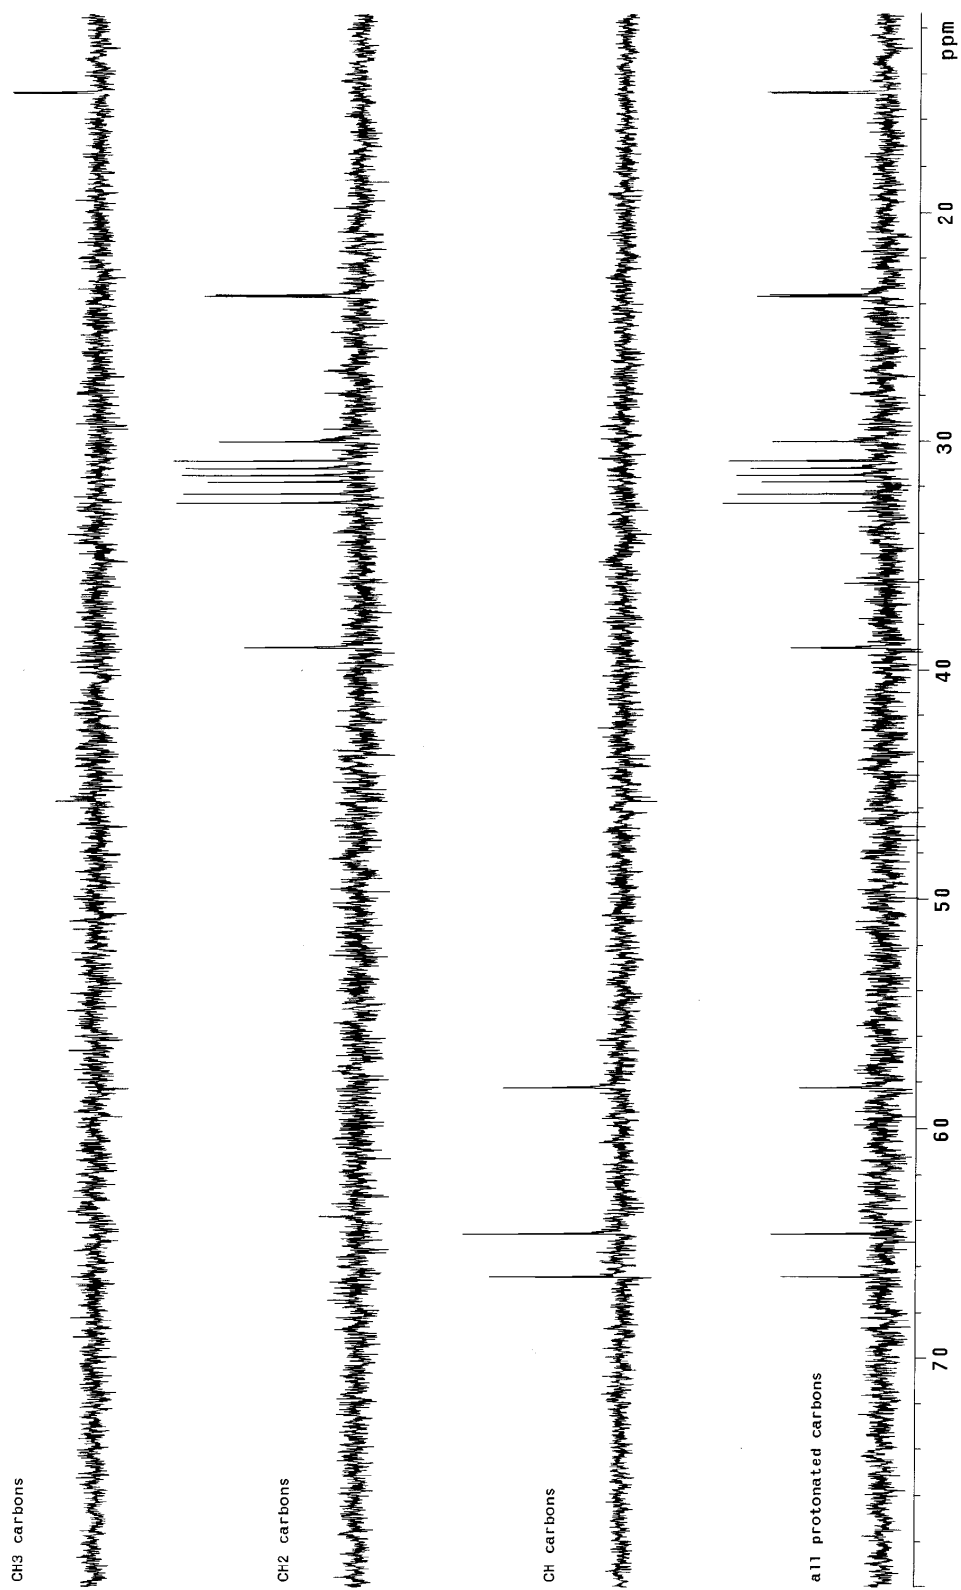

Peak 6 ( 12.91 : 12.95 ) Ref. ( 12.66 : 12.83 ) of C:\HPCHEM1\DATA\251OEDIA.D

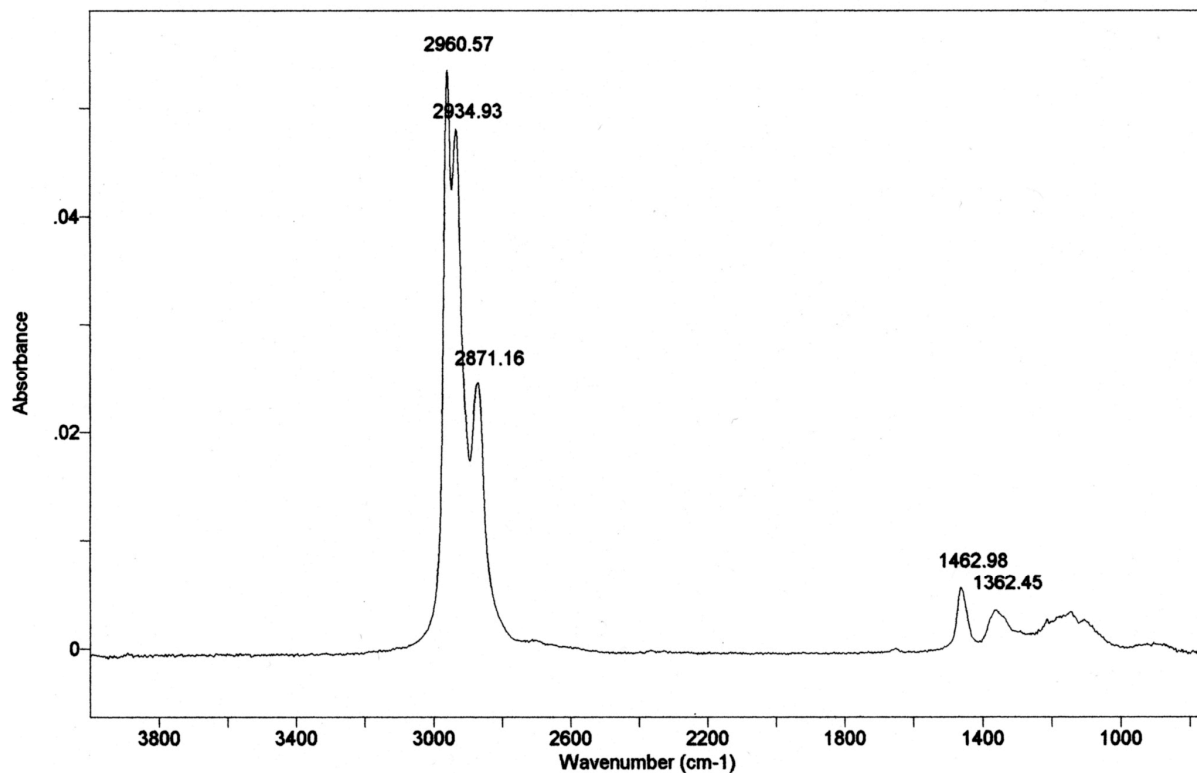

#### FT-IR spectrum of **7** (R = *n*-C<sub>7</sub>H<sub>15</sub>, R' = *n*-Pr)

The peak at around 2872 cm<sup>-1</sup> (2871.16 cm<sup>-1</sup>) is different from both FTIRs of **7** (R = *n*-Pr, R' = *n*-C<sub>7</sub>H<sub>15</sub>) and ent-**7** (R = *n*-Pr, R' = *n*-C<sub>7</sub>H<sub>15</sub>), but is identical with both FTIRs of *M. baroni* (2870.93 cm<sup>-1</sup>) and *M. bernhardi* (2870.98 cm<sup>-1</sup>). The shape between 1050 cm<sup>-1</sup> and 1250 cm<sup>-1</sup> is different from both FTIRs of **7** (R = *n*-Pr, R' = *n*-C<sub>7</sub>H<sub>15</sub>) and ent-**7** (R = *n*-Pr, R' = *n*-C<sub>7</sub>H<sub>15</sub>), but is identical with both FTIRs of *M. baroni* and *M. bernhardi*.

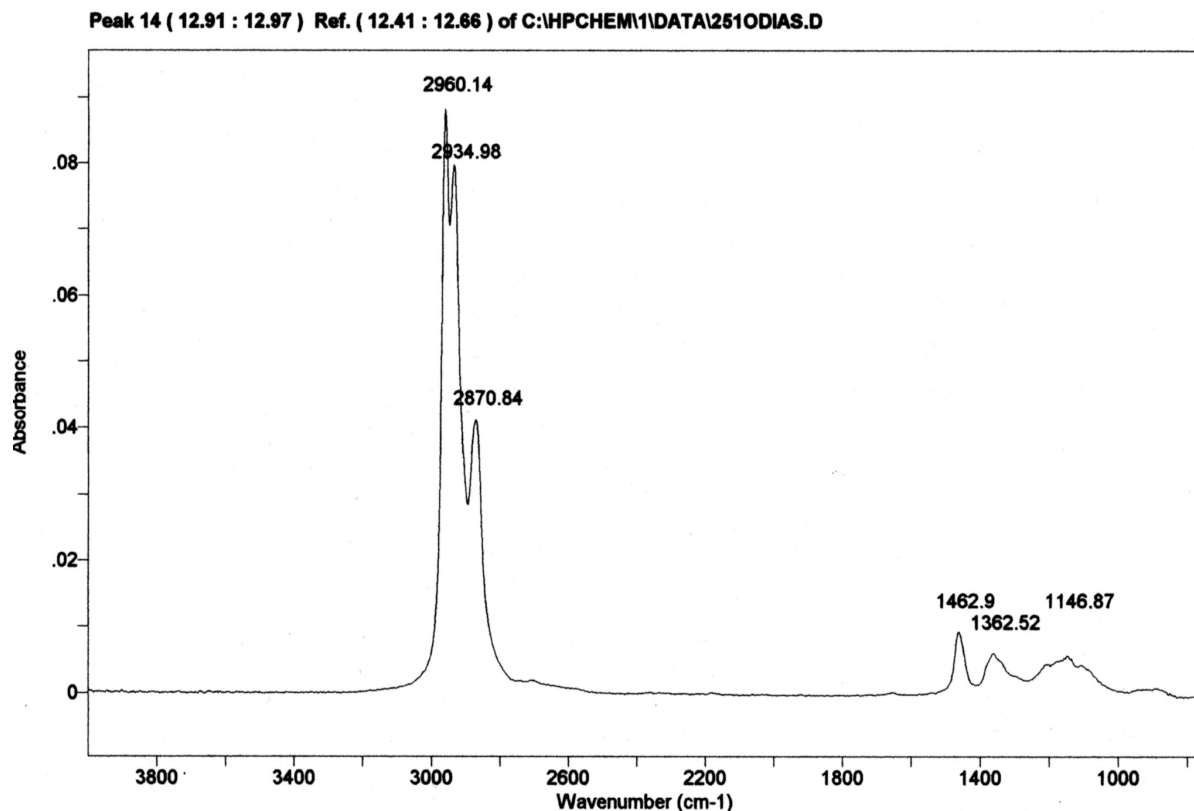

**FT-IR spectrum of ent-7 (R =  $n\text{-C}_7\text{H}_{15}$ , R' =  $n\text{-Pr}$ )**

The peak at around  $2872\text{ cm}^{-1}$  ( $2870.84\text{ cm}^{-1}$ ) is different from both FTIRs of **7** (R =  $n\text{-Pr}$ , R' =  $n\text{-C}_7\text{H}_{15}$ ) and ent-**7** (R =  $n\text{-Pr}$ , R' =  $n\text{-C}_7\text{H}_{15}$ ), but is identical with both FTIRs of *M. baroni* ( $2870.93\text{ cm}^{-1}$ ) and *M. bernhardi* ( $2870.98\text{ cm}^{-1}$ ). The shape between  $1050\text{ cm}^{-1}$  and  $1250\text{ cm}^{-1}$  is different from both FTIRs of **7** (R =  $n\text{-Pr}$ , R' =  $n\text{-C}_7\text{H}_{15}$ ) and ent-**7** (R =  $n\text{-Pr}$ , R' =  $n\text{-C}_7\text{H}_{15}$ ), but is identical with both FTIRs of *M. baroni* and *M. bernhardi*.



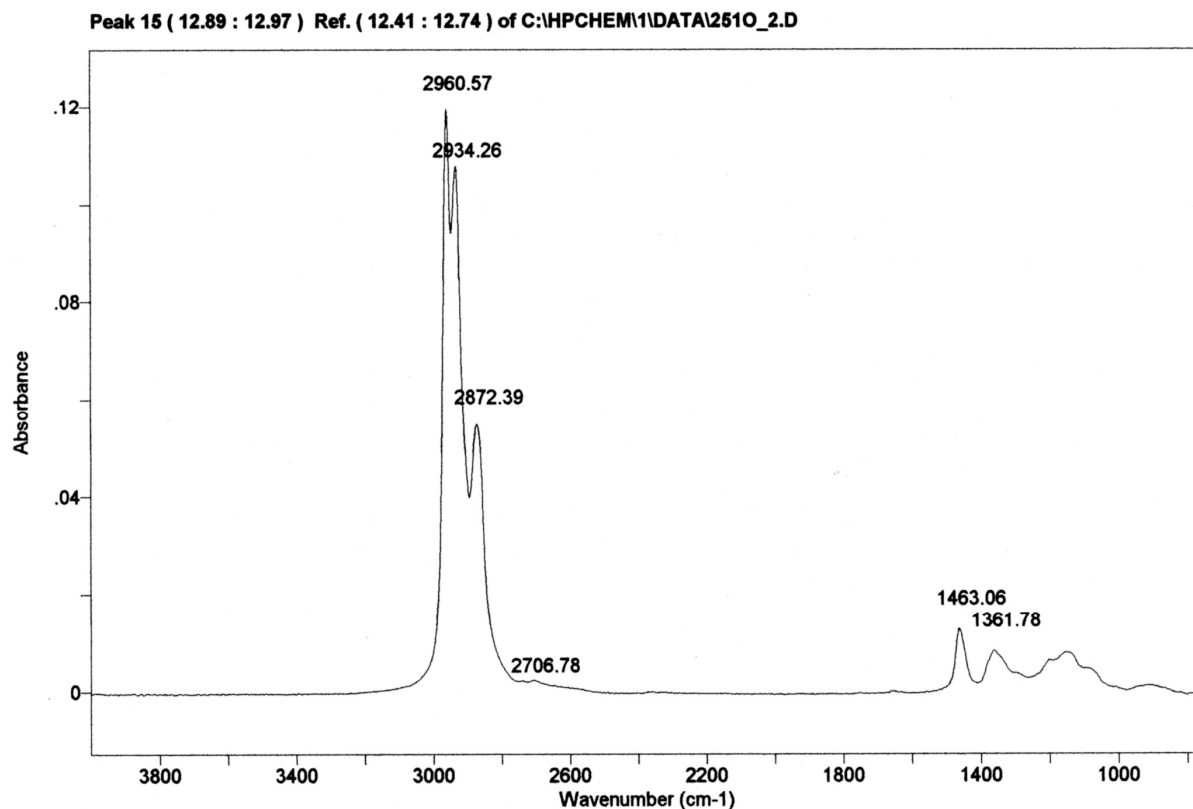

#### FT-IR spectrum of **7** ( $R = n\text{-Pr}$ , $R' = n\text{-C}_7\text{H}_{15}$ )

The peak at around  $2872\text{ cm}^{-1}$  ( $2872.39\text{ cm}^{-1}$ ) is different from both FTIRs of **7** ( $R = n\text{-C}_7\text{H}_{15}$ ,  $R' = n\text{-Pr}$ ,  $2871.16\text{ cm}^{-1}$ ) and ent-**7** ( $R = n\text{-C}_7\text{H}_{15}$ ,  $R' = n\text{-Pr}$ ,  $2870.84\text{ cm}^{-1}$ ), and is also different from both FTIRs of *M. baroni* ( $2870.93\text{ cm}^{-1}$ ) and *M. bernhardi* ( $2870.98\text{ cm}^{-1}$ ). The shape between  $1050\text{ cm}^{-1}$  and  $1250\text{ cm}^{-1}$  is different from both FTIRs of **7** ( $R = n\text{-C}_7\text{H}_{15}$ ,  $R' = n\text{-Pr}$ ) and ent-**7** ( $R = n\text{-C}_7\text{H}_{15}$ ,  $R' = n\text{-Pr}$ ), and is also different from both FTIRs of *M. baroni* and *M. bernhardi*.

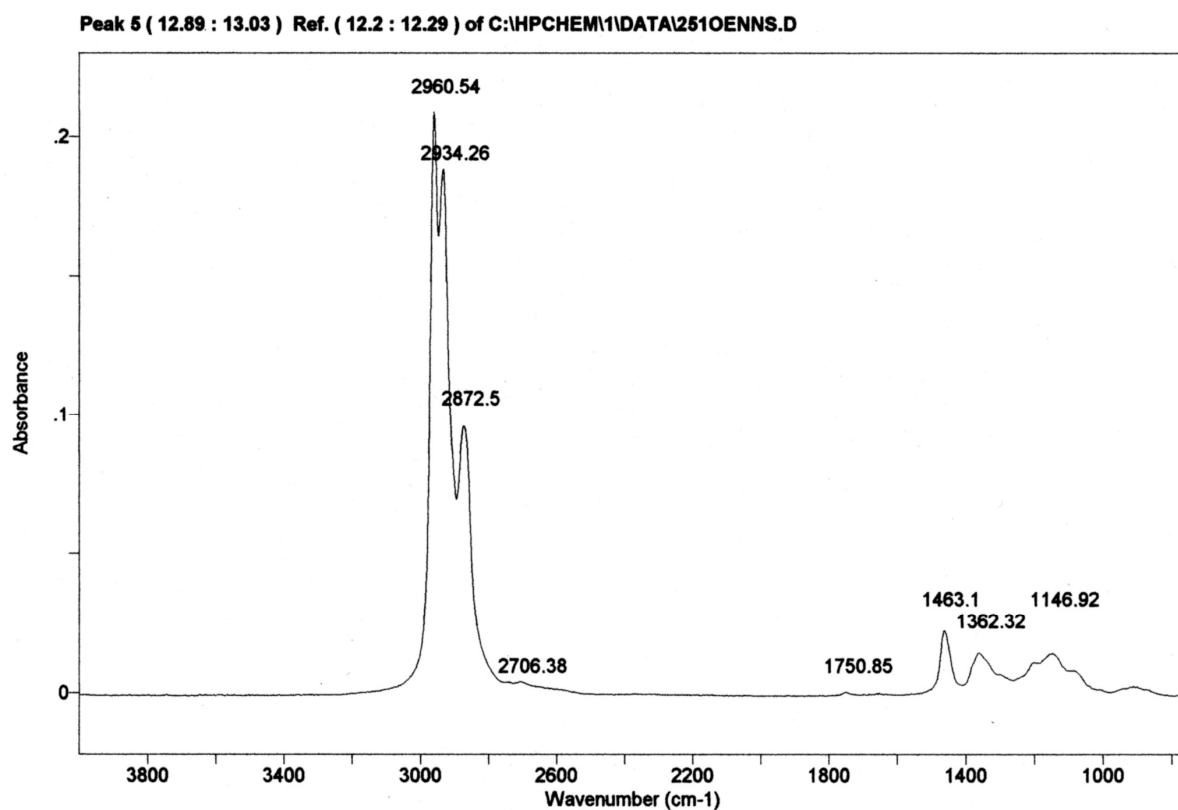

**FT-IR spectrum of ent-7 (R = *n*-Pr, R' = *n*-C<sub>7</sub>H<sub>15</sub>)**

The peak at around 2872 cm<sup>-1</sup> (2872.5 cm<sup>-1</sup>) is different from both FTIRs of **7** (R = *n*-C<sub>7</sub>H<sub>15</sub>, R' = *n*-Pr, 2871.16 cm<sup>-1</sup>) and ent-**7** (R = *n*-C<sub>7</sub>H<sub>15</sub>, R' = *n*-Pr, 2870.84 cm<sup>-1</sup>), and is also different from both FTIRs of *M. baroni* (2870.93 cm<sup>-1</sup>) and *M. bernhardi* (2870.98 cm<sup>-1</sup>). The shape between 1050 cm<sup>-1</sup> and 1250 cm<sup>-1</sup> is different from both FTIRs of **7** (R = *n*-C<sub>7</sub>H<sub>15</sub>, R' = *n*-Pr) and ent-**7** (R = *n*-C<sub>7</sub>H<sub>15</sub>, R' = *n*-Pr), and is also different from both FTIRs of *M. baroni* and *M. bernhardi*.

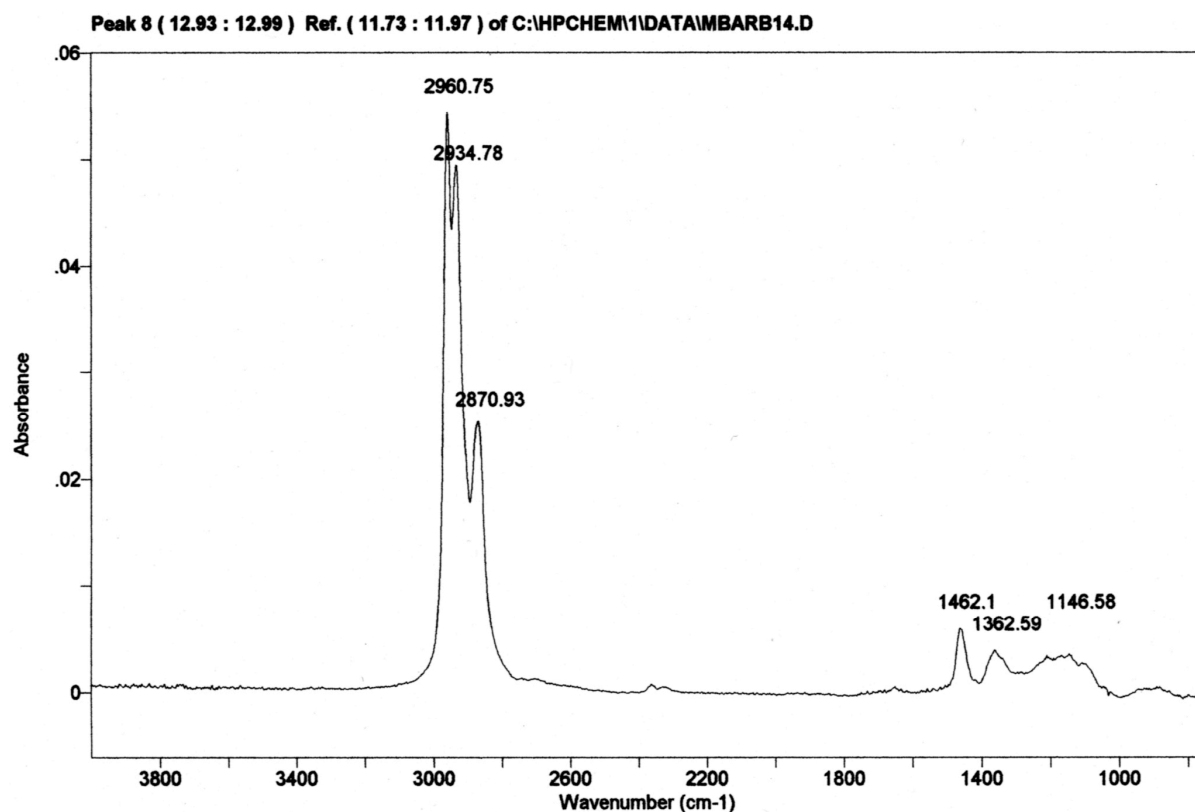

### FT-IR spectrum of *M. baroni*

The peak at around  $2872\text{ cm}^{-1}$  ( $2870.93\text{ cm}^{-1}$ ) is identical with both FTIRs of **7** ( $R = n\text{-C}_7\text{H}_{15}$ ,  $R' = n\text{-Pr}$ ,  $2871.16\text{ cm}^{-1}$ ) and ent-**7** ( $R = n\text{-C}_7\text{H}_{15}$ ,  $R' = n\text{-Pr}$ ,  $2870.84\text{ cm}^{-1}$ ), but is different from both FTIRs of **7** ( $R = n\text{-Pr}$ ,  $R' = n\text{-C}_7\text{H}_{15}$ ,  $2872.39\text{ cm}^{-1}$ ) and ent-**7** ( $R = n\text{-Pr}$ ,  $R' = n\text{-C}_7\text{H}_{15}$ ,  $2872.5\text{ cm}^{-1}$ ). The shape between  $1050\text{ cm}^{-1}$  and  $1250\text{ cm}^{-1}$  is identical with both FTIRs of **7** ( $R = n\text{-C}_7\text{H}_{15}$ ,  $R' = n\text{-Pr}$ ) and ent-**7** ( $R = n\text{-C}_7\text{H}_{15}$ ,  $R' = n\text{-Pr}$ ), but is different from both FTIRs of **7** ( $R = n\text{-Pr}$ ,  $R' = n\text{-C}_7\text{H}_{15}$ ) and ent-**7** ( $R = n\text{-Pr}$ ,  $R' = n\text{-C}_7\text{H}_{15}$ ).

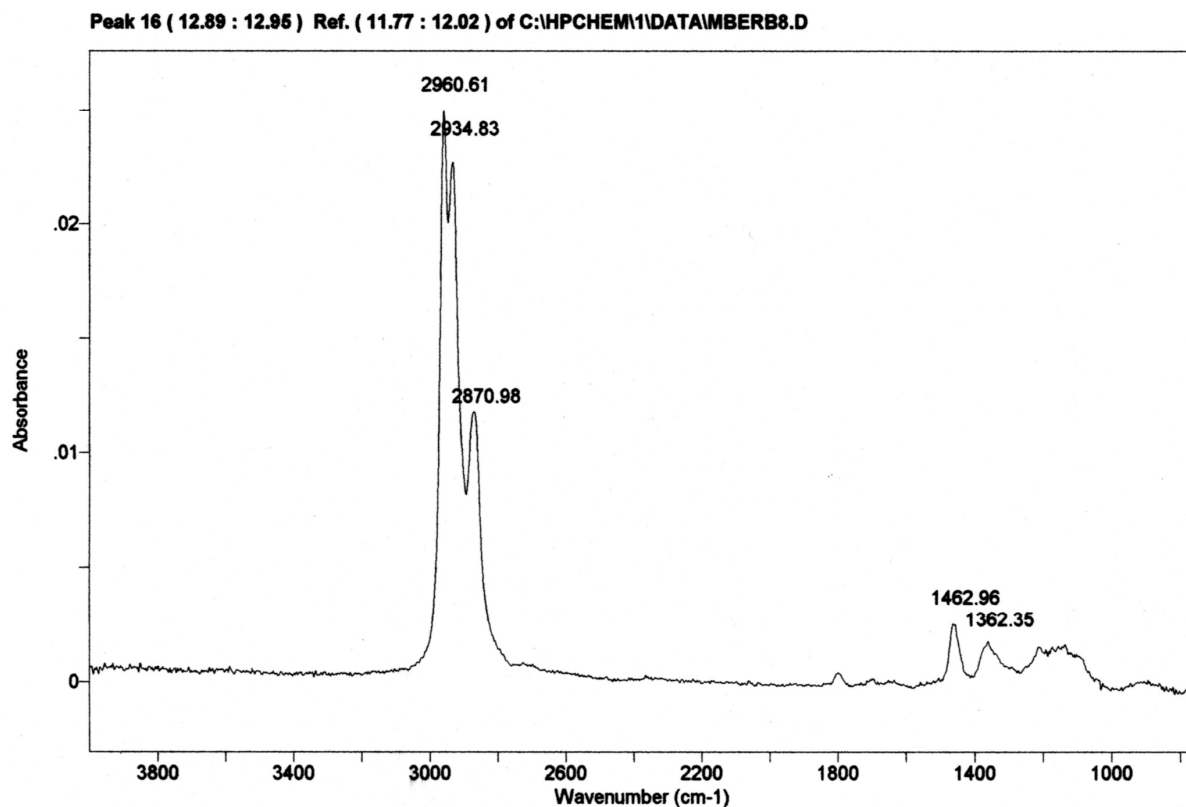

### FT-IR spectrum of *M. bernhardi*

The peak at around  $2872\text{ cm}^{-1}$  ( $2870.98\text{ cm}^{-1}$ ) is identical with both FTIRs of **7** ( $R = n\text{-C}_7\text{H}_{15}$ ,  $R' = n\text{-Pr}$ ,  $2871.16\text{ cm}^{-1}$ ) and ent-**7** ( $R = n\text{-C}_7\text{H}_{15}$ ,  $R' = n\text{-Pr}$ ,  $2870.84\text{ cm}^{-1}$ ), but is different from both FTIRs of **7** ( $R = n\text{-Pr}$ ,  $R' = n\text{-C}_7\text{H}_{15}$ ,  $2872.39\text{ cm}^{-1}$ ) and ent-**7** ( $R = n\text{-Pr}$ ,  $R' = n\text{-C}_7\text{H}_{15}$ ,  $2872.5\text{ cm}^{-1}$ ). The shape between  $1050\text{ cm}^{-1}$  and  $1250\text{ cm}^{-1}$  is identical with both FTIRs of **7** ( $R = n\text{-C}_7\text{H}_{15}$ ,  $R' = n\text{-Pr}$ ) and ent-**7** ( $R = n\text{-C}_7\text{H}_{15}$ ,  $R' = n\text{-Pr}$ ), but is different from both FTIRs of **7** ( $R = n\text{-Pr}$ ,  $R' = n\text{-C}_7\text{H}_{15}$ ) and ent-**7** ( $R = n\text{-Pr}$ ,  $R' = n\text{-C}_7\text{H}_{15}$ ).

251O\_en\_new\_sample\_more\_dilute+251O\_e...  
alkaloids

4/15/2009 10:10:49 AM

RT: 11.98 - 27.94

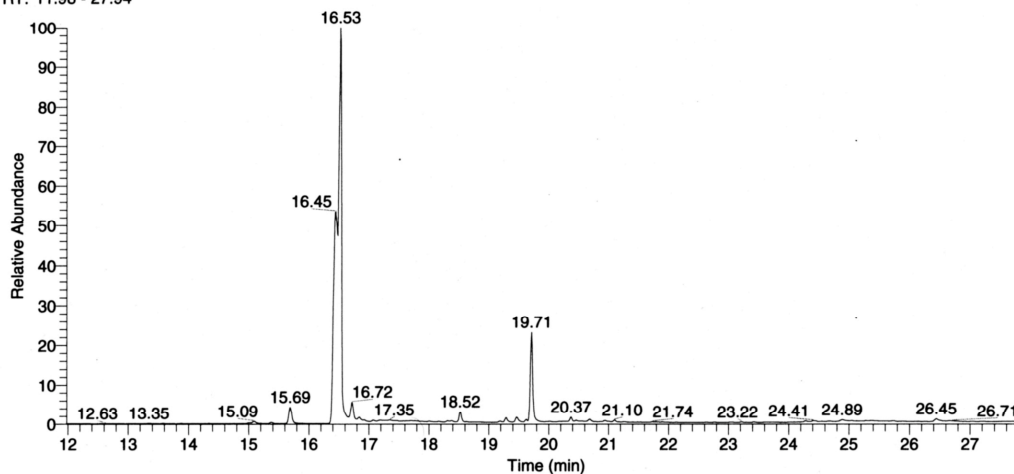251O\_en\_new\_sample\_more\_dilute+251O\_ent\_diast\_slow\_ramp #1228 RT: 16.45 AV: 1 NL: 7.61E5  
T: + c Full ms [ 50.00-650.00]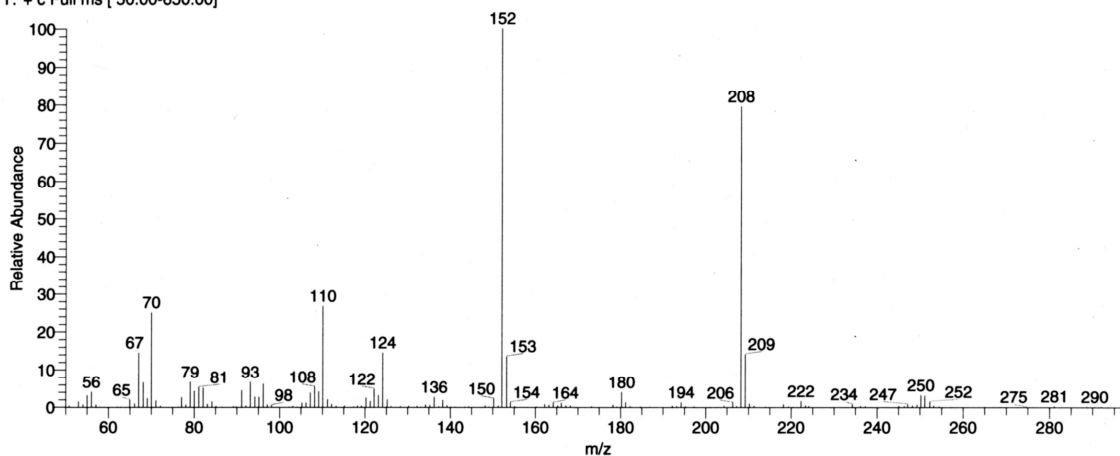251O\_en\_new\_sample\_more\_dilute+251O\_ent\_diast\_slow\_ramp #1238 RT: 16.53 AV: 1 NL: 1.19E6  
T: + c Full ms [ 50.00-650.00]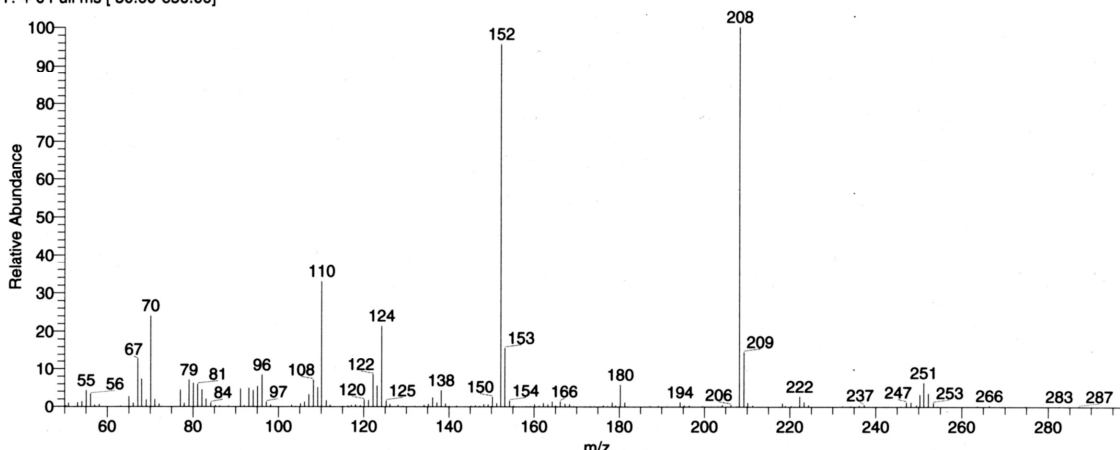

GC-MS of a coinjection of ent-**7** ( $R = n\text{-Pr}$ ,  $R' = n\text{-C}_7\text{H}_{15}$ ) and ent-**7** ( $R = n\text{-C}_7\text{H}_{15}$ ,  $R' = n\text{-Pr}$ ). They showed different  $R_t$ , and the fragment at  $m/z$  208 is larger for ent-**7** ( $R = n\text{-C}_7\text{H}_{15}$ ,  $R' = n\text{-Pr}$ ,  $R_t = 16.53$  min).

251O\_coinj\_M\_baroni14+251O\_2\_slow\_ramp  
alkaloids

4/14/2009 9:01:21 AM

RT: 11.96 - 28.02

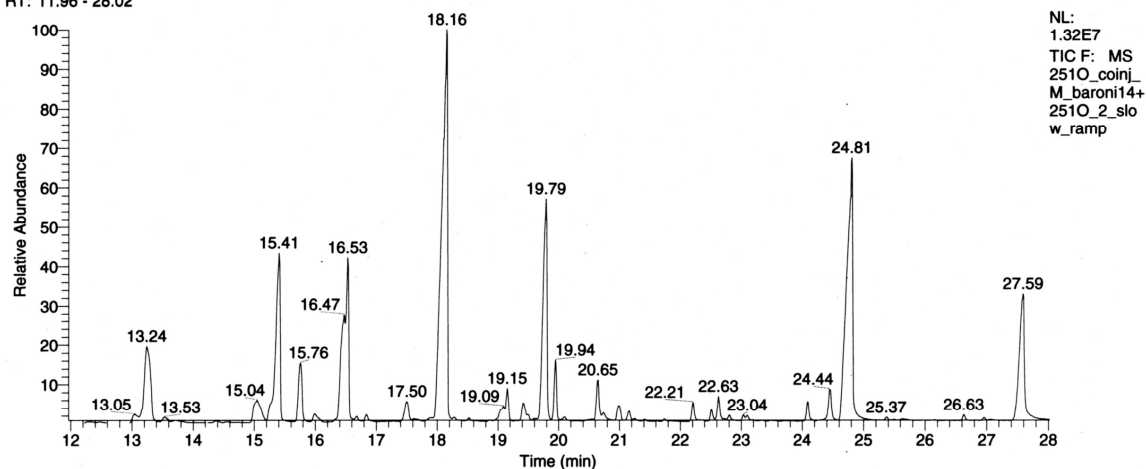

251O\_coinj\_M\_baroni14+251O\_2\_slow\_ramp #1244 RT: 16.47 AV: 1 NL: 8.95E5  
T: + c Full ms [ 50.00-650.00]

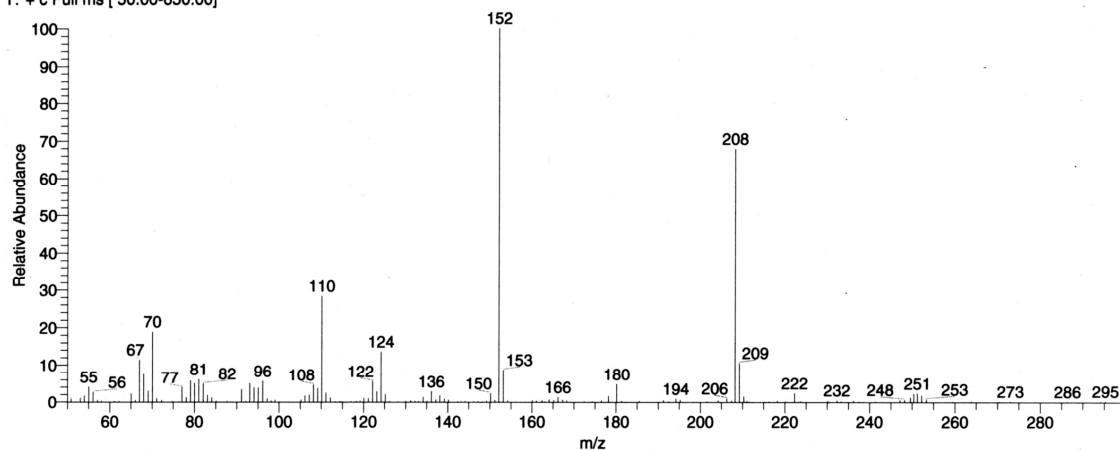

251O\_coinj\_M\_baroni14+251O\_2\_slow\_ramp #1251 RT: 16.53 AV: 1 NL: 1.09E6  
T: + c Full ms [ 50.00-650.00]

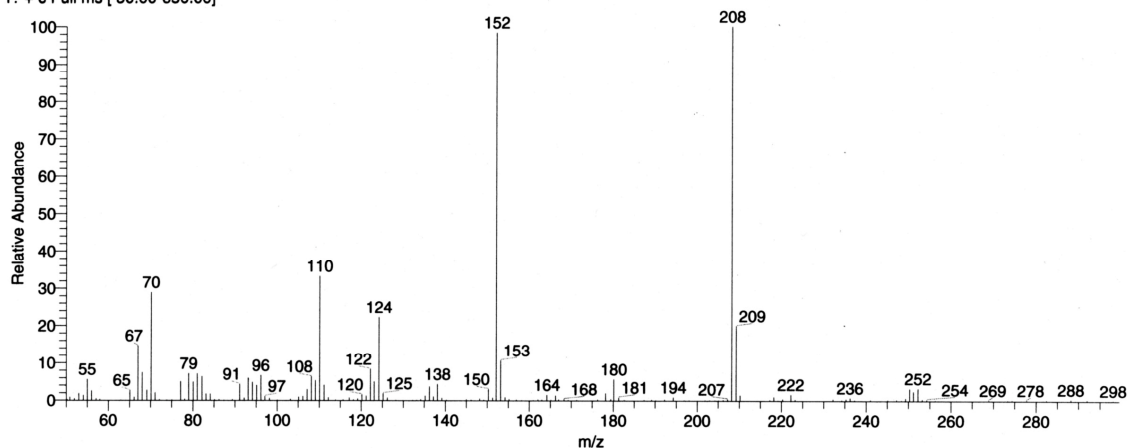

GC-MS of a coinjection of ent-7 ( $R = n\text{-Pr}$ ,  $R' = n\text{-C}_7\text{H}_{15}$ ) and an extract of *M. baroni*. They showed different Rt (ent-7 ( $R = n\text{-Pr}$ ,  $R' = n\text{-C}_7\text{H}_{15}$ ), Rt = 16.47 min, an extract of *M. baroni*, 16.53 min. The two mass spectra showed the same difference for the fragment at  $m/z$  208.

251O\_coinj\_M\_baroni14+251O\_diast\_slow...  
alkaloids

4/15/2009 8:34:12 AM

RT: 12.00 - 28.01

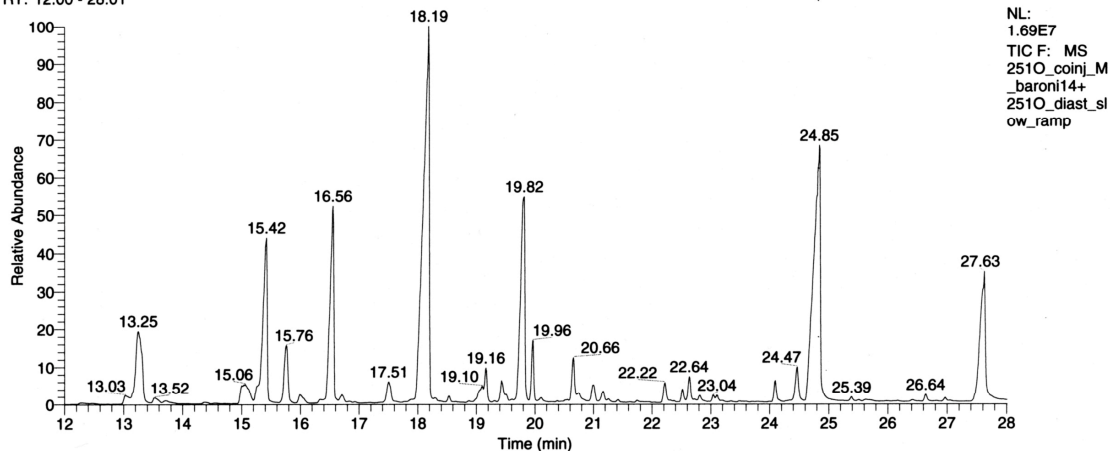251O\_coinj\_M\_baroni14+251O\_diast\_slow\_ramp #1257 RT: 16.56 AV: 1 NL: 1.81E6  
T: + c Full ms [ 50.00-650.00]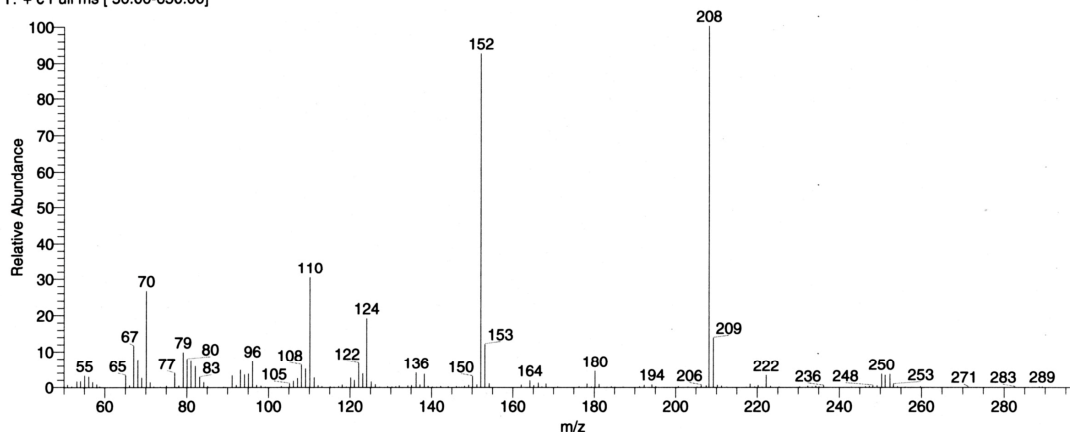251O\_coinj\_M\_baroni14+251O\_diast\_slow\_ramp #1248 RT: 16.48 AV: 1 NL: 5.52E5  
T: + c Full ms [ 50.00-650.00]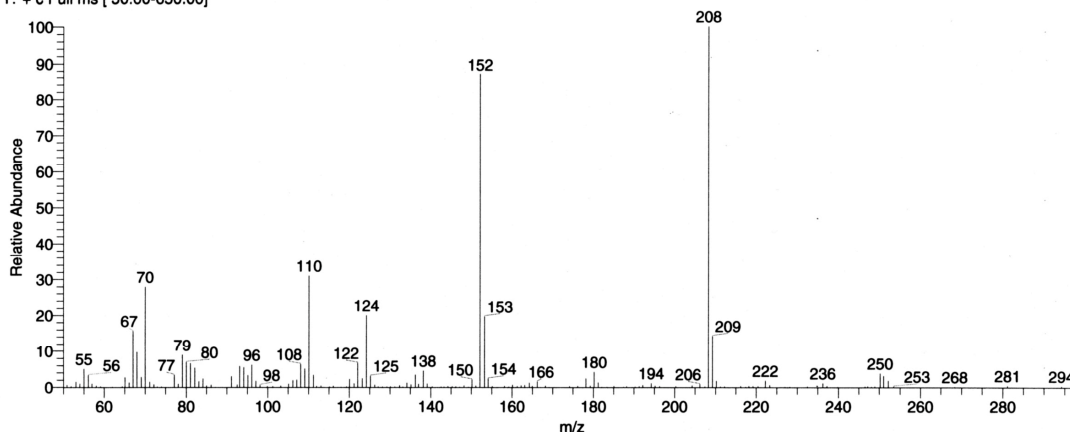

GC-MS of a coinjection of ent-**7** ( $R = n\text{-C}_7\text{H}_{15}$ ,  $R' = n\text{-Pr}$ ) and an extract of *M. baroni*. The samples coeluted with  $R_t = 16.56$  min, indicating that this is the right diastereomer for natural **251O**. Also the mass spec showed the large fragment at  $m/z$  208. The second spectrum was taken at the start of the peak (16.48 min) and still showed large  $m/z$  208. There is nothing here of the other diastereomer (ent-**7** ( $R = n\text{-Pr}$ ,  $R' = \text{C}_7\text{H}_{15}$ )).
